# Supplementary material for: Neural mechanisms of parasite-induced summiting behavior in “zombie” Drosophila
Source: bioRxiv preprint, doi:10.1101/2022.12.01.518723, version 1 (2022-12-01)
Supplement: File S1 [file 518723_file03.xlsx]

## Sheet: All_data_M
Molecular Weight	Putative Formula	Retention time [min]	Putative ID	Mean C	Mean NS	Mean S	CV% C	CV% NS	CV% S	NS/C	S/C	S/NS	log2(NS/C)	log2(S/C)	log2(S/NS)	pValue NS/C	pValue S/C	pValue S/NS	# ChemSpider Results	# mzCloud Results	# mzVault Results	mzCloud Best Match	mzVault Best Match	mzVault Library Match: Bamba lab 34 lipid mediators library stepped NCE 10 30 45	mzVault Library Match: Bamba lab 598 polar metabolites stepped NCE 10 30 45	mzVault Library Match: Custom mzVault Library	Mass List Match: CharlesHilicListWithRT_1807_QEI	MS2	Formula	Mz Cloud	Mz Vault	ChemSpider	Mass List	Manual chromatogram check
143.094	C7 H13 N O2	9.49	1-Aminocyclohexanecarboxylic acid	20000	60000	200000	100	16.6667	35	3	9	3	1.79	3.12	1.33	0.217001	0.0773159	0.478847	132	3	0	85.2		No matches found	No matches found	No matches found	No matches found	ddMS2 for preferred ion	C7 H13 N O2_ppm:-1.85_Ifit:92MatchedIso.:2	1-Aminocyclohexanecarboxylic acid_score:85.2; DL-Stachydrine_score:85.3		4520351_:(2E)-4-Amino-5-methyl-2-hexenoic acid_ppm:0_mzLogicScore:20; 474013_:7-Methoxy-8-oxa-1-azabicyclo(5.1.0)octane_ppm:0_mzLogicScore:26; 4518209_:N-[(3E)-2-Hydroxy-3-penten-1-yl]acetamide_ppm:0_mzLogicScore:19; 21240345_:1,1-Dimethyl-2-pyrrolidiniumcarboxylate_ppm:0_mzLogicScore:36; 115001_:8-Azabicyclo[3.2.1]octane-2,7-diol_ppm:0_mzLogicScore:32; 4521277_:Ethyl (2E)-4-amino-2-pentenoate_pp…		Present in E+ and E-, probably not in C
169.085	C7 H11 N3 O2	10.895	1-Methylhistidine	30000000	30000000	10000000	33.3333	0.333333	60	1	0.6	0.6	0.05	-0.79	-0.84	0.968338	0.378027	0.303493	38	13	0	97.7		No matches found	No matches found	No matches found	No matches found	ddMS2 for preferred ion	C7 H11 N3 O2_ppm:-2.51_Ifit:47MatchedIso.:4	Ethyl 4-[(2-oxopiperidino)methyl]tetrahydropyrazine-1(2H)-carboxylate_simScore:81.9; Methyl-L-histidinate_score:51.4; Ipronidazole_score:51.5; 3-Methylhistidine_score:53.2; α-Methyl-DL-histidine_score:95.3; 1-Methylhistidine_score:97.7		67028698_:3-(1(2H)-Pyrimidinyl)alanine_ppm:0_mzLogicScore:35; 67495082_:1,6-Dimethyl-2-oxo-1,2,3,4-tetrahydro-5-pyrimidinecarboxamide_ppm:0_mzLogicScore:39; 67177681_:Methyl 1,3a,4,5,6,6a-hexahydropyrrolo[3,4-c]pyrazole-3-carboxylate_ppm:0_mzLogicScore:39; 67163025_:1-Isobutyl-5-nitro-1H-imidazole_ppm:0_mzLogicScore:40; 67163360_:1-(2-Methyl-2-propanyl)-5-nitro-1H-imidazole_ppm:0_mzLogicScore:38;…		~same in all
75.0682	C3 H9 N O	15.943	2-Amino-1-propanol	1000000	3000000	10000000	30	20	50	2	9	4	1.13	3.21	2.08	0.126772	0.00832274	0.0285775	19	2	0	58.9		No matches found	No matches found	No matches found	No matches found	ddMS2 for preferred ion	C3 H9 N O_ppm:-2.62_Ifit:86MatchedIso.:5	(S)-(+)-2-Amino-1-propanol_score:58.9		8324492_:N-Hydroxy-1-propanamine_ppm:0_mzLogicScore:NA; 4415083_:Methylaminoethanol_ppm:0_mzLogicScore:NA; 122177_:Trimethylhydroxylamine_ppm:0_mzLogicScore:NA; 2049472_:2-(Aminooxy)propane_ppm:0_mzLogicScore:NA; 2049467_:aminopropylether_ppm:0_mzLogicScore:NA; 75918_:Dimethylaminomethanol_ppm:0_mzLogicScore:NA; 3751151_:S-(+-2-alaninol)_ppm:0_mzLogicScore:NA; 4422556_:1-Amino-1-propanol_ppm:0_mz…		High in E+, present in C and E-
109.064	C5 H7 N3	12.618	2-Amino-4-methylpyrimidine	2000000	2000000	1000000	45	10	100	1	0.8	0.8	-0.01	-0.26	-0.26	0.992963	0.888796	0.837261	37	4	0	76.5		No matches found	No matches found	No matches found	No matches found	ddMS2 for preferred ion	C5 H7 N3_ppm:-2.73_Ifit:78MatchedIso.:3	1-{2-[(1-Methyl-4-nitro-1H-imidazol-5-yl)amino]ethyl}tetrahydro-2H-imidazol-2-one_simScore:85.1; 2-Amino-4-methylpyrimidine_score:77.5		67029751_:(E)-N-Vinyl-1-[(E)-vinyldiazenyl]methanimine_ppm:0_mzLogicScore:22; 66000773_:3,4-Dihydro-1(2H)-pyrimidinecarbonitrile_ppm:0_mzLogicScore:22; 67174218_:4-Allyl-1H-1,2,3-triazole_ppm:0_mzLogicScore:28; 67172553_:4,5-Dihydro-1H-pyrazol-1-ylacetonitrile_ppm:0_mzLogicScore:24; 67159602_:N-1H-Pyrrol-2-ylimidoformamide_ppm:0_mzLogicScore:26; 67167640_:3-(1-Aziridinyl)-1H-pyrazole_ppm:0_mzLogi…		~same in all; reps don't agree well
103.063	C4 H9 N O2	4.279	3-Aminoisobutyric acid	1000000	800000	2000000	30	1.25	5	0.6	1	2	-0.7	0.3	1	0.0641378	0.328685	0.0236873	67	8	2	66	85	No matches found	Multiple matches found	No matches found	No matches found	ddMS2 for preferred ion	C4 H9 N O2_ppm:-3.09_Ifit:91MatchedIso.:2	DL-3-Aminoisobutyric acid_score:88; D-(-)-2-Aminobutyric acid_score:95.7; L(+)-2-Aminobutyric acid_score:95.9; 2-Aminobutyric acid_score:96.8; 2-Aminoisobutyric acid_score:96.9; N,N-Dimethylglycine_score:97; N-Ethylglycine_score:97.1	DL-3-Aminoisobutyric acid_score:85	67028775_:2-(Hydroxyamino)-2-methylpropanal_ppm:0_mzLogicScore:26; 67038495_:1,3,2-Dioxazepane_ppm:0_mzLogicScore:17; 67173409_:1,5,3-Dioxazepane_ppm:0_mzLogicScore:17; 67170584_:N-Hydroxytetrahydro-2-furanamine_ppm:0_mzLogicScore:22; 9994972_:(1E)-Butylideneazinic acid_ppm:0_mzLogicScore:13; 61041724_:N-(1-Hydroxyethyl)-N-methylformamide_ppm:0_mzLogicScore:13; 2282993_:(Methylamino)methyl acetat…		Highest in E+, C ~= E-
188.141	C10 H20 O3	2.726	3-Hydroxydecanoic acid	100000000	10000000	2000000	50	7	100	0.1	0.02	0.2	-3.05	-5.75	-2.7	0.126103	0.0200039	0.111259	62	4	0	59.8		No matches found	No matches found	No matches found	No matches found	ddMS2 for preferred ion	C10 H20 O3_ppm:-0.82_Ifit:52MatchedIso.:4	3-Hydroxydecanoic acid_score:59.8		67028545_:Ethyl 4-ethoxyhexanoate_ppm:0_mzLogicScore:51; 67034094_:9-Decene-1,3,5-triol_ppm:0_mzLogicScore:71; 11403653_:8-Hydroxydecanoic acid_ppm:0_mzLogicScore:80; 65998814_:1,2-Dihydroxy-3-decanone_ppm:0_mzLogicScore:73; 35014808_:4-(1-Hydroxy-2-propanyl)-1-methyl-1,2-cyclohexanediol_ppm:0_mzLogicScore:54; 35013631_:2-(3-Hydroxy-4-methylcyclohexyl)-1,2-propanediol_ppm:0_mzLogicScore:54; 66737…		Highest in C, present in all 3
203.115	C9 H17 N O4	9.753	Acetyl-L-carnitine	300000	500000	2000000	33.3333	8	100	1	6	4	0.52	2.55	2.03	0.875763	0.309924	0.486662	36	2	0	85.3		No matches found	No matches found	No matches found	Single match found	ddMS2 for preferred ion	C9 H17 N O4_ppm:-2.37_Ifit:64MatchedIso.:3	1-Methyl-4-(1-pyrrolidinyl)-1H-pyrazolo[3,4-d]pyrimidine_score:52; Acetyl-L-carnitine_score:85.3		67030207_:4-[(2-Carboxyethyl)(methyl)amino]-2-methylbutanoic acid_ppm:0_mzLogicScore:28; 67492553_:(3S)-3-Hydroxy-4-oxo-3-[(trimethylammonio)methyl]pentanoate_ppm:0_mzLogicScore:32; 67491884_:[(2-Methyl-2-propanyl)oxy]carbonyl 2-methylalaninate_ppm:0_mzLogicScore:15; 55869974_:N-(3-Methylbutanoyl)-L-homoserine_ppm:0_mzLogicScore:21; 65328523_:N-Butyl-3-methylaspartic acid_ppm:0_mzLogicScore:21; 6…	Acetyl-carnitine,ΔRT:-0.88	Highest in E+; reps don't agree well
216.122	C8 H16 N4 O3	12.868	Acetylarginine	10000000	10000000	700000	6	60	42.8571	1	0.07	0.08	-0.07	-3.79	-3.72	0.938226	0.024903	0.029769	6	4	0	98.9		No matches found	No matches found	No matches found	No matches found	ddMS2 for preferred ion	C8 H16 N4 O3_ppm:-2.49_Ifit:67MatchedIso.:4	N-α-L-Acetyl-arginine_score:93.1; Acetylarginine_score:98.9		66000567_:N~5~-Acetyl-N~5~-carbamimidoylornithine_ppm:0.001_mzLogicScore:78; 67163498_:2-Acetyl-L-arginine_ppm:0.001_mzLogicScore:78; 4518536_:(5E)-5-[(E)-Diazenyl(hydroxy)methylene]-2,2,4,4-tetramethyl-1,3-imidazolidinediol_ppm:0.001_mzLogicScore:33; 1415246_:N~2~-Acetyl-D-arginine_ppm:0.001_mzLogicScore:78; 92866_:acetylarginine_ppm:0.001_mzLogicScore:99; 60752_:ACETYL ARGININE_ppm:0.001_mzLogi…		Highest in E- and C; low but present in E+
145.11	C7 H15 N O2	11.539	Acetylcholine	800000	1000000	2000000	25	3	30	1	2	2	0.45	1.17	0.72	0.493669	0.104333	0.303754	93	3	0	90.7		No matches found	No matches found	No matches found	No matches found	ddMS2 for preferred ion	C7 H15 N O2_ppm:-2.28_Ifit:74MatchedIso.:3	Acetylcholine_score:90.7		67039446_:N,N-Dimethyl-L-isovaline_ppm:0_mzLogicScore:24; 67035464_:(1E)-N,N-Dimethoxy-1-penten-1-amine_ppm:0_mzLogicScore:5; 67166891_:2-Methyl-L-isoleucine_ppm:0_mzLogicScore:15; 10725663_:2-(Trimethylammonio)butanoate_ppm:0_mzLogicScore:29; 11380146_:5-Aminoheptanoic acid_ppm:0_mzLogicScore:15; 10304742_:Hexylcarbamic acid_ppm:0_mzLogicScore:15; 65547451_:N-Ethyl-L-norvaline_ppm:0_mzLogicScore…		Highest in E+, present in all 3
135.054	C5 H5 N5	8.333	Adenine	300000	2000000	10000000	20	100	20	7	40	5	2.9	5.15	2.26	0.113813	0.0189281	0.112473	39	3	0	98.9		No matches found	No matches found	No matches found	No matches found	ddMS2 for preferred ion	C5 H5 N5_ppm:-1.81_Ifit:84MatchedIso.:4	Adenine_score:98.9		67031367_:1,2-Dihydroimidazo[4,5-d][1,2,3]triazepine_ppm:0_mzLogicScore:17; 65999993_:7-Methyltetrazolo[1,5-a]pyrimidine_ppm:0_mzLogicScore:15; 67173802_:1H-Pyrazolo[4,3-c]pyridazin-3-amine_ppm:0_mzLogicScore:18; 67490874_:4-(1H-Pyrazol-3-yl)-1H-1,2,3-triazole_ppm:0_mzLogicScore:10; 67162665_:1-(2-Pyrimidinyl)hydrazinecarbonitrile_ppm:0_mzLogicScore:24; 67155773_:1H-Pyrazolo[3,4-d]pyridazin-7-ami…		Only in E+, E- (weird!)
267.096	C10 H13 N5 O4	8.401	Adenosine	300000	2000000	1000000	23.3333	50	100	5	4	0.8	2.42	2.16	-0.26	0.315966	0.405605	0.959375	65	1	0	97.8		No matches found	No matches found	No matches found	No matches found	ddMS2 for preferred ion	C12 H18 N3 P S_ppm:0.82_Ifit:36MatchedIso.:2; C10 H21 N O3 S2_ppm:-0.6_Ifit:35MatchedIso.:3; C9 H17 N O8_ppm:2.65_Ifit:64MatchedIso.:3; C10 H13 N5 O4_ppm:-2.36_Ifit:71MatchedIso.:4	Adenosine_score:97.8		67038149_:(2S)-2-Amino-3-({(2R,3R,4R,5S)-5-[(1R)-1,2-dihydroxyethyl]-3,4-dihydroxytetrahydro-2-furanyl}oxy)propanoic acid (non-preferred name)_ppm:-0.001_mzLogicScore:19; 65792879_:(1xi)-1-(6-Amino-7H-purin-2-yl)-1,5-anhydro-D-xylitol_ppm:0.001_mzLogicScore:16; 65793521_:(1xi)-1-(6-Amino-7H-purin-2-yl)-1,5-anhydro-D-arabinitol_ppm:0.001_mzLogicScore:16; 65793564_:2-Amino-9-(2-deoxy-L-threo-pentof…		Highest in one E+ and one E- sample
89.0474	C3 H7 N O2	13.242	Alanine	40000000	40000000	30000000	15	2.5	23.3333	1	0.8	0.7	0.12	-0.31	-0.43	0.85842	0.471625	0.289976	33	9	0	71		No matches found	No matches found	No matches found	Single match found	ddMS2 for preferred ion	C3 H7 N O2_ppm:-2.68_Ifit:83MatchedIso.:4	Lactamide_score:69.4; β-Alanine_score:69.9; DL-Alanine_score:71		66423762_:Ethyl methyleneazinate_ppm:0_mzLogicScore:NA; 67497017_:1,3,5-Dioxazinane_ppm:0_mzLogicScore:NA; 13354736_:1,3-Oxazolidin-2-ol_ppm:0_mzLogicScore:NA; 60999005_:(3E)-3-(Hydroxyimino)-1-propanol_ppm:0_mzLogicScore:NA; 67039198_:1,3,2-Dioxazinane_ppm:0_mzLogicScore:NA; 7875468_:(2E)-1-Hydroxy-2-propanone oxime_ppm:0_mzLogicScore:NA; 8488533_:3,3-Azetidinediol_ppm:0_mzLogicScore:NA; 1065236…	Alanine,ΔRT:-1.42	~same in all
146.021	C5 H6 O5	14.376	alpha-ketoglutarate	600000	200000	50000	66.6667	45	2	0.3	0.08	0.3	-1.79	-3.62	-1.83	0.1518	0.0278839	0.15726	20	0	0			No matches found	No matches found	No matches found	Single match found	ddMS2 for preferred ion	C5 H6 O5_ppm:-1.78_Ifit:80MatchedIso.:3			67497982_:2-Hydroxy-1,3-dioxepane-4,7-dione_ppm:0_mzLogicScore:15; 24769922_:acetoxy ketone_ppm:0_mzLogicScore:15; 389800_:(2R)-4,5-Dihydroxy-2-(hydroxymethyl)-3(2H)-furanone_ppm:0_mzLogicScore:11; 389720_:(S)-2-methyl-3-oxosuccinic acid_ppm:0_mzLogicScore:15; 32989602_:3-Ethoxy-2,3-dioxopropanoic acid_ppm:0_mzLogicScore:15; 4885628_:5-Hydroxy-2,4-dioxopentanoic acid_ppm:0_mzLogicScore:15; 190397…	alpha-ketoglutarate,ΔRT:-0.8	Highest in C, lowest in E+
152.068	C5 H12 O5	10.712	Arabitol or other pentol	7000000	4000000	3000000	11.4286	15	13.3333	0.6	0.5	0.8	-0.7	-1.05	-0.34	0.0646014	0.0227752	0.302989	9	6	6	97.7	90.3	No matches found	Multiple matches found	No matches found	No matches found	ddMS2 for preferred ion	C5 H12 O5_ppm:-2.17_Ifit:74MatchedIso.:3	Xylitol_score:92.6; L-(-)-Arabitol_score:97.6; D-(+)-Arabitol_score:97.7	D-Xylitol_score:88.5; D-Arabitol_score:89.9; Ribitol_score:90.3	67496980_:2-[Hydroxy(dimethoxy)methoxy]ethanol_ppm:0_mzLogicScore:23; 21865515_:apiitol_ppm:0_mzLogicScore:53; 133720_:D-apiitol_ppm:0_mzLogicScore:53; 21391692_:(3xi)-D-erythro-Pentitol_ppm:0_mzLogicScore:68; 10254628_:Ribitol_ppm:0_mzLogicScore:68; 388391_:L-(−)-Arabitol_ppm:0_mzLogicScore:68; 84971_:D-(+)-arabitol_ppm:0_mzLogicScore:68; 804_:pentane-1,2,3,4,5-pentol_ppm:0_mzLogicScore:68; 6646…		Highest in C, but reps don’t argee well
174.111	C6 H14 N4 O2	18.859	Arginine	8000000	5000000	800000	62.5	8	87.5	0.6	0.1	0.2	-0.74	-3.33	-2.59	0.839848	0.0824129	0.127103	10	2	1	98.1	93.5	No matches found	Single match found	No matches found	Single match found	ddMS2 for preferred ion	C6 H14 N4 O2_ppm:-2.65_Ifit:70MatchedIso.:4	L-(+)-Arginine_score:85.4; DL-Arginine_score:98.1	L-Arginine_score:93.5	10652931_:N-(3-Carbamimidamidopropyl)glycine_ppm:0_mzLogicScore:51; 10132526_:2-amino-5-ureidopentanamide_ppm:0_mzLogicScore:76; 8115599_:N,N'-Bis(2-aminoethyl)ethanediamide_ppm:0_mzLogicScore:25; 261379_:N,N,N',N'-Tetramethyl-1,2-hydrazinedicarboxamide_ppm:0_mzLogicScore:25; 22223_:N,N'-Diethyl-N,N'-dinitroso-1,2-ethanediamine_ppm:0_mzLogicScore:25; 21083_:Isobutylidenediurea_ppm:0_mzLogicScore:…	Arginine,ΔRT:-0.76	Highest in C, but reps don’t argee well
132.053	C4 H8 N2 O3	13.031	Asparagine	700000	400000	200000	57.1429	17.5	100	0.6	0.3	0.5	-0.72	-1.62	-0.89	0.845162	0.318749	0.529971	41	4	0			No matches found	No matches found	No matches found	Single match found	ddMS2 for preferred ion	C4 H8 N2 O3_ppm:-2.58_Ifit:97MatchedIso.:2	Actinomycin D_simScore:81.6; Creatine_score:61.4		67173907_:2-(Nitromethyl)-1,2-oxazolidine_ppm:0_mzLogicScore:34; 10351198_:3-Nitro-1,3-oxazinane_ppm:0_mzLogicScore:32; 24192336_:4-(Nitroamino)-2-butanone_ppm:0_mzLogicScore:28; 19961796_:1-(Nitrosoamino)ethyl acetate_ppm:0_mzLogicScore:26; 21375901_:4-Nitroso-3-morpholinol_ppm:0_mzLogicScore:36; 19961795_:(Methylamino)methyl N-oxoglycinate_ppm:0_mzLogicScore:32; 2340246_:N-Carbamoyl-2-methoxyac…	Asparagine,ΔRT:-0.83	~same in all; up in one C rep
117.079	C5 H11 N O2	9.652	Betaine	8000000	30000000	100000000	8.75	10	30	3	10	4	1.77	3.81	2.05	0.00877931	0.000976125	0.00584452	99	12	0	98.8		No matches found	No matches found	No matches found	Multiple matches found	ddMS2 for preferred ion	C5 H11 N O2_ppm:-3.08_Ifit:52MatchedIso.:5	5-Aminovaleric acid_score:96.9; Betaine_score:98.8; Valine_score:99.1		67036086_:3-Methyl-3-nitroso-2-butanol_ppm:0_mzLogicScore:14; 67024886_:5-Ethoxy-1,3-oxazolidine_ppm:0_mzLogicScore:19; 14455654_:2,6-Piperidinediol_ppm:0_mzLogicScore:19; 67031483_:1-Piperidinol 1-oxide_ppm:0_mzLogicScore:19; 10814156_:2-(1,3-Dioxolan-4-yl)ethanamine_ppm:0_mzLogicScore:10; 476893_:2-Methoxy-N-methylpropanamide_ppm:0_mzLogicScore:19; 9139677_:(2S,3S,4R)-2-Methyl-3,4-pyrrolidinedi…	Valine,ΔRT:0.16; Valine,ΔRT:-1.44	highest in E+, but present in other two (E+ >> E- > C)
237.085	C9 H11 N5 O3	10.382	Biopterin	300000	300000	1000000	10	2.33333	90	0.9	4	4	-0.2	1.95	2.15	0.956114	0.163989	0.129931	49	3	0	88.3		No matches found	No matches found	No matches found	No matches found	ddMS2 for preferred ion	C3 H12 N9 O2 P_ppm:1.38_Ifit:32MatchedIso.:2; C8 H15 N O7_ppm:2.67_Ifit:79MatchedIso.:2; C9 H19 N O2 S2_ppm:-0.99_Ifit:42MatchedIso.:2; C9 H11 N5 O3_ppm:-2.97_Ifit:86MatchedIso.:3	Mebendazole amine_score:56.2; Sepiapterin_score:71.9; Biopterin_score:88.3		67028081_:2-Oxo-N-(4-oxo-3,4,5,6,7,8-hexahydro-2-pteridinyl)propanamide_ppm:0.001_mzLogicScore:12; 67027843_:(4R,5S,6R,7R)-1-Amino-4,5,6,7,8-pentahydroxy-2,3-octanedione_ppm:-0.001_mzLogicScore:14; 67034407_:6-O-Glycyl-D-mannose_ppm:-0.001_mzLogicScore:14; 65791855_:N-[(3R,4S,5S,6R)-2,3,4,5-Tetrahydroxy-6-(hydroxymethyl)tetrahydro-2H-pyran-2-yl]acetamide (non-preferred name)_ppm:-0.001_mzLogicSco…		Highest in E+, present in all 3
244.088	C10 H16 N2 O3 S	7.552	Biotin	200000	100000	100000	30	20	9	0.8	0.9	1	-0.35	-0.11	0.23	0.691391	0.981599	0.786436	17	1	0	97.7		No matches found	No matches found	No matches found	No matches found	ddMS2 for preferred ion	C11 H17 O4 P_ppm:4.18_Ifit:76MatchedIso.:2; C12 H13 N4 P_ppm:-1.3_Ifit:72MatchedIso.:2; C10 H16 N2 O3 S_ppm:-2.85_Ifit:75MatchedIso.:3	Biotin_score:97.7		65998754_:5-(1,3-Dioxolan-2-yl)-1-(ethoxymethyl)-2-(methylsulfanyl)-1H-imidazole_ppm:0.001_mzLogicScore:12; 67025772_:2-Anilinoethyl 2-aminoethanesulfonate_ppm:0.001_mzLogicScore:14; 469512_:Methyl N-acetyl-S-(1-cyano-2-propanyl)cysteinate_ppm:0.001_mzLogicScore:22; 5408838_:5-[(3aR,4S,6aR)-2-Oxohexahydro-1H-thieno[3,4-d]imidazol-4-yl]pentanoic acid_ppm:0.001_mzLogicScore:41; 8809412_:3-(5-tert-b…		~same in all; reps don't agree well
161.105	C7 H15 N O3	11.425	Carnitine	300000000	300000000	200000000	20	1.33333	30	1	0.9	0.8	0.2	-0.12	-0.32	0.725411	0.891668	0.497733	35	15	0	99.6		No matches found	No matches found	No matches found	Single match found	ddMS2 for preferred ion	C7 H15 N O3_ppm:-2.86_Ifit:67MatchedIso.:5	L(-)-Carnitine_score:99.6; D-Carnitine_score:99.6; DL-Carnitine_score:99.7		66000461_:1-(Diethylamino)ethyl hydrogen carbonate_ppm:0_mzLogicScore:29; 67169859_:3-(Dimethylamino)-4-hydroxy-3-methylbutanoic acid_ppm:0_mzLogicScore:36; 67491388_:3-(Trimethylammonio)propyl carbonate_ppm:0_mzLogicScore:43; 67167340_:4-Hydroxy-N,N-dimethyl-L-isovaline_ppm:0_mzLogicScore:36; 13277426_:3-hydroxy-4-(trimethyl-$l^{4}-azanyl)butanoate_ppm:0_mzLogicScore:72; 19987102_:t-Butyl-D-seri…	Carnitine,ΔRT:-0.91	~same in all; up in one E+ rep
103.099	C5 H13 N O	15.5	Choline	200000000	200000000	1000000000	1.5	45	30	0.9	5	6	-0.13	2.38	2.51	0.899805	0.0384622	0.0300427	34	21	0	98.2		No matches found	No matches found	No matches found	No matches found	ddMS2 for preferred ion	C5 H13 N O_ppm:-3.52_Ifit:56MatchedIso.:6	Choline_score:98.2		16331058_:N-Methoxy-2-methyl-1-propanamine_ppm:0_mzLogicScore:18; 10808764_:Ethanolisopropylamine_ppm:0_mzLogicScore:27; 9426995_:2-(Dimethylamino)-2-propanol_ppm:0_mzLogicScore:36; 261783_:1-Ethoxy-N,N-dimethylmethanamine_ppm:0_mzLogicScore:27; 2284216_:1-Amino-2,2-dimethyl-1-propanol_ppm:0_mzLogicScore:18; 467287_:1-(Aminooxy)-3-methylbutane_ppm:0_mzLogicScore:18; 76829_:(Diethylamino)methanol_…		way up in E+, also present in E- and C
192.027	C6 H8 O7	12.643	Citric acid	400000	800000	20000	10	25	15	2	0.04	0.02	0.92	-4.75	-5.66	0.0765279	0.00074555	0.000444784	22	3	3	67.4	78.3	No matches found	Multiple matches found	No matches found	No matches found	ddMS2 for preferred ion	C6 H8 O7_ppm:-0.77_Ifit:73MatchedIso.:2	Citric acid_score:67.4	Citric acid_score:78.3	67159005_:7,8-Dihydroxy-7,8-dimethyl-1,2,4,5-tetraoxaspiro[2.5]octan-6-one_ppm:0_mzLogicScore:35; 67157197_:(5S)-3,4-Dihydroxy-5-(1,1,2-trihydroxyethyl)-2(5H)-furanone_ppm:0_mzLogicScore:36; 4450365_:4-Deoxy-D-xylo-hexarate_ppm:0.001_mzLogicScore:41; 35015997_:L-erythro-Hexo-2,3-diulosonic acid_ppm:0_mzLogicScore:40; 58837655_:(3aS,6S,6aR)-3,3,3a,6-Tetrahydroxytetrahydrofuro[3,2-b]furan-2(3H)-one…		present in all samples at comparable levels - erroneous p value!
175.095	C6 H13 N3 O3	13.679	Citrulline	200000	200000	500000	40	2.5	80	1	3	2	0.19	1.48	1.29	0.956304	0.50187	0.638426	13	2	0	88		No matches found	No matches found	No matches found	No matches found	ddMS2 for preferred ion	C6 H13 N3 O3_ppm:-2.49_Ifit:71MatchedIso.:4	L-(+)-Citrulline_score:88		67036862_:Glycyl-N-methyl-L-serinamide_ppm:0_mzLogicScore:24; 20171514_:N-carbamylornithine_ppm:0_mzLogicScore:47; 67490513_:4-(1,3-Dimethyl-2-triazanyl)-4-oxobutanoic acid_ppm:0_mzLogicScore:30; 67177381_:N~2~-(2-Hydroxyethyl)-L-aspartamide_ppm:0_mzLogicScore:30; 14625133_:Ethyl (2E)-3-(2-hydroxyethyl)-1-methyl-2-triazene-1-carboxylate_ppm:0_mzLogicScore:18; 24775579_:l-canavanine_ppm:0_mzLogicS…		~same in all; up in one E+ rep
113.059	C4 H7 N3 O	8.574	Creatinine	300000	60000	50000	133.333	33.3333	40	0.2	0.2	0.8	-2.31	-2.57	-0.26	0.860865	0.793024	0.989278	20	3	0	76.1		No matches found	No matches found	No matches found	No matches found	ddMS2 for preferred ion	C4 H7 N3 O_ppm:-1.99_Ifit:87MatchedIso.:3	Creatinine_score:76.1		67172533_:2-[(1E)-3-Oxo-1-propen-1-yl]guanidine_ppm:0_mzLogicScore:21; 67174943_:(2Z)-N-Hydroxy-3,4-dihydro-2(1H)-pyrimidinimine_ppm:0_mzLogicScore:29; 67495427_:4,5-Dihydro-1H-imidazole-1-carboxamide_ppm:0_mzLogicScore:31; 67177611_:1-(4,5-Dihydro-1H-1,2,4-triazol-3-yl)ethanone_ppm:0_mzLogicScore:25; 20129914_:3-Amino-1-diazo-2-butanone_ppm:0_mzLogicScore:20; 10544238_:5,5-Dimethyl-4,5-dihydro-3…		up in one C rep
243.085	C9 H13 N3 O5	10.553	Cytidine	60000	100000	3000000	100	20	33.3333	2	40	20	0.87	5.42	4.55	0.526616	0.0299906	0.061254	34	6	3	88.8	76.8	No matches found	Multiple matches found	No matches found	No matches found	ddMS2 for preferred ion	C11 H18 N O P S_ppm:1_Ifit:38MatchedIso.:2; C9 H13 N3 O5_ppm:-2.49_Ifit:76MatchedIso.:4	Cytarabine_score:88.7; Cytidine_score:88.8	Cytidine_score:76.8	19472415_:6-Amino-2'-deoxyuridine_ppm:0.001_mzLogicScore:NA; 10578699_:(1S)-1-(2-Amino-4-oxo-1,4-dihydro-5-pyrimidinyl)-1,4-anhydro-D-arabinitol_ppm:0.001_mzLogicScore:NA; 21377844_:2'-DeoxycytidineN-oxide_ppm:0.001_mzLogicScore:NA; 65792849_:4-Amino-1-(D-arabinopyranosyl)-2(1H)-pyrimidinone_ppm:0.001_mzLogicScore:NA; 58163503_:1-(beta-D-xylopyranosyl)cytosine_ppm:0.001_mzLogicScore:NA; 2281928_:…		Highest in E+, present in small amt C and E-
111.043	C4 H5 N3 O	9.718	Cytosine	80000	700000	4000000	25	28.5714	22.5	8	50	6	3.01	5.51	2.5	0.0078535	0.00134299	0.0127526	47	3	0	59.5		No matches found	No matches found	No matches found	No matches found	ddMS2 for preferred ion	C4 H5 N3 O_ppm:-2.51_Ifit:59MatchedIso.:4	Isocytosine_score:82.1; Cytosine_score:89.4		67030899_:5,6-Dihydro[1,3]oxazolo[3,2-b][1,2,4]triazole_ppm:0_mzLogicScore:29; 67034320_:(3E)-4-Azido-3-buten-2-one_ppm:0_mzLogicScore:27; 67037736_:3-Oxo-4-pyrazolidinecarbonitrile_ppm:0_mzLogicScore:23; 66738757_:4-Amino-5-methyl-3H-pyrazol-3-one_ppm:0_mzLogicScore:34; 67495025_:4-(1-Aziridinyl)-1,2,3-oxadiazole_ppm:0_mzLogicScore:29; 67162516_:1-(1-Cyanovinyl)urea_ppm:0_mzLogicScore:34; 145998…		Highest in E+, also in E-, absent in C
252.085	C10 H12 N4 O4	8.848	Deoxyinosine	200000	50000	200000	30	20	100	0.3	1	4	-1.79	0.03	1.82	0.344806	0.92541	0.48503	31	2	1	78	64.2	No matches found	Single match found	No matches found	No matches found	ddMS2 for preferred ion	C9 H16 O8_ppm:3.5_Ifit:80MatchedIso.:2; C10 H22 O P2 S_ppm:-5_Ifit:79MatchedIso.:2; C12 H17 N2 P S_ppm:1.56_Ifit:72MatchedIso.:2; C4 H13 N8 O3 P_ppm:2.28_Ifit:47MatchedIso.:2; C10 H20 O3 S2_ppm:0.05_Ifit:79MatchedIso.:2; C10 H12 N4 O4_ppm:-1.81_Ifit:78MatchedIso.:2	5,5-Diphenylhydantoin_score:69.8; 2'-Deoxyinosine_score:78	Deoxyinosine_score:64.2	11625634_:1,4-Anhydro-1-(1H-purin-2-yl)pentitol_ppm:0_mzLogicScore:21; 66424882_:(1xi)-1,5-Anhydro-1-(7H-purin-2-yl)-D-arabinitol_ppm:0_mzLogicScore:19; 67170588_:9-(beta-D-Ribopyranosyl)-9H-purine_ppm:0_mzLogicScore:32; 67497836_:1,3-Diethyl-6-nitro-1H-imidazo[4,5-b]pyridine-2,5(3H,4H)-dione_ppm:0_mzLogicScore:22; 58837546_:1-(4-Amino-2,3,4-trideoxy-beta-D-erythro-hex-2-enopyranuronosyl)-4-imino…		~ same; one E+ up
105.079	C4 H11 N O2	12.802	Diethanolamine	1000000	2000000	2000000	7	50	100	2	2	1	1.06	1.19	0.13	0.586114	0.58834	0.999988	16	4	0	99.5		No matches found	No matches found	No matches found	No matches found	ddMS2 for preferred ion	C4 H11 N O2_ppm:-2.6_Ifit:80MatchedIso.:5	Diethanolamine_score:99.5		13558581_:1-Amino-2-methyl-1,3-propanediol_ppm:0_mzLogicScore:52; 13284830_:1-Amino-2-ethoxyethanol_ppm:0_mzLogicScore:67; 10750874_:Iminodiethanol_ppm:0_mzLogicScore:54; 11186996_:4-Amino-1,3-butanediol_ppm:0_mzLogicScore:72; 34209023_:2-(Methylamino)-1,3-propanediol_ppm:0_mzLogicScore:67; 11500235_:2-Amino-1,4-butanediol_ppm:0_mzLogicScore:72; 8053026_:1-Amino-2,2-butanediol_ppm:0_mzLogicScore:…		Up in one E+, one E-, low in others, blank high
229.088	C9 H15 N3 O2 S	12.648	Ergothioneine	8000	100000	400000	1	200	50	20	60	3	4.11	5.86	1.75	0.476457	0.121774	0.378144	14	1	0	88.5		No matches found	No matches found	No matches found	No matches found	ddMS2 for preferred ion	C10 H16 N O3 P_ppm:4.56_Ifit:87MatchedIso.:2; C9 H15 N3 O2 S_ppm:-2.94_Ifit:74MatchedIso.:3	L-Ergothioneine_score:88.5		67039361_:Dimethyl (2-ethylphenyl)phosphoramidate_ppm:-0.001_mzLogicScore:9; 67038494_:Phenyl hydrogen diethylphosphoramidate_ppm:-0.001_mzLogicScore:13; 67027126_:Diethyl (6-methyl-2-pyridinyl)phosphonate_ppm:-0.001_mzLogicScore:9; 67496668_:5-Methyl-2-(4-morpholinylamino)-5,6-dihydro-4H-1,3-thiazin-4-one_ppm:0.001_mzLogicScore:17; 4516244_:N-[4-(5-Oxo-2-thioxo-4-imidazolidinyl)butyl]acetamide_p…		Only in E+, E-; completely gone in C
337.334	C22 H43 N O	2.055	Erucamide	1000000	2000000	6000000	100	100	33.3333	2	6	3	0.93	2.51	1.58	0.918502	0.334273	0.478304	18	1	0	92.8		No matches found	No matches found	No matches found	No matches found	ddMS2 for preferred ion	C22 H43 N O_ppm:-2.5_Ifit:66MatchedIso.:3	Erucamide_score:92.8		67161277_:1-Ethyl-3-(3-propylundecyl)-2-azepanone_ppm:0.001_mzLogicScore:54; 67160773_:3-(2-Butyldecyl)-1-ethyl-2-azepanone_ppm:0.001_mzLogicScore:50; 67160426_:1,4-Dioctyl-2-azepanone_ppm:0.001_mzLogicScore:46; 57561664_:2-Docosenamide_ppm:0.001_mzLogicScore:57; 499658_:2-Methyl-1-(1-pyrrolidinyl)-1-heptadecanone_ppm:0.001_mzLogicScore:54; 464643_:N,N-Bis(2-ethylhexyl)cyclopentanecarboxamide_ppm…		Highest in E+, present in one C and one E-
132.042	C5 H8 O4	12.506	Ethylmalonic acid	5000000	4000000	3000000	8	15	6.66667	0.8	0.6	0.8	-0.35	-0.73	-0.37	0.19675	0.0374035	0.190307	44	2	0	76.7		No matches found	No matches found	No matches found	No matches found	ddMS2 for preferred ion	C5 H8 O4_ppm:-1.57_Ifit:68MatchedIso.:3	Methylsuccinic acid_score:63.7; Ethylmalonic acid_score:76.7		67498581_:4,4-Dihydroxy-2,3-pentanedione_ppm:0_mzLogicScore:9; 67028211_:3-(2-Oxoethoxy)propanoic acid_ppm:0_mzLogicScore:9; 67030414_:3,3-Dihydroxytetrahydro-2H-pyran-2-one_ppm:0_mzLogicScore:10; 67030709_:Acetic (2R)-2-hydroxypropanoic anhydride_ppm:0_mzLogicScore:9; 60823083_:3,3-Dihydroxy-2,4-pentanedione_ppm:0_mzLogicScore:9; 33289523_:(3S,4R,5R)-3,4-Dihydroxy-5-methyldihydro-2(3H)-furanone …		~same in all Rxes; some peaks aren't integrated
180.063	C6 H12 O6	11.316	Galactose	100000	400000	2000000	60	10	50	3	10	4	1.53	3.4	1.87	0.244947	0.0494906	0.230141	143	4	0	87.3		No matches found	No matches found	No matches found	No matches found	ddMS2 for preferred ion	C6 H12 O6_ppm:-1.98_Ifit:85MatchedIso.:3	D-(+)-Mannose_score:82.2; D-(-)-Fructose_score:87.1; D-(+)-Galactose_score:95.8; D-(+)-Glucose_score:97.3		112956_:3-C-(Hydroxymethyl)pentose_ppm:0_mzLogicScore:58; 5447164_:alpha-D-Idopyranose_ppm:0_mzLogicScore:73; 388638_:L-fuconic acid_ppm:0_mzLogicScore:67; 9943812_:L-Fructofuranose_ppm:0_mzLogicScore:68; 606_:2-Deoxyhexonic acid_ppm:0_mzLogicScore:67; 5028037_:alpha-L-Allopyranose_ppm:0_mzLogicScore:73; 5341895_:alpha-L-Mannopyranose_ppm:0_mzLogicScore:73; 5360257_:beta-L-Sorbopyranose_ppm:0_mzL…		Higher in E+, present in all 3
103.063	C4 H9 N O2	13.206	Gamma-Aminobutyric acid	20000000	20000000	20000000	10	0.15	0.2	1	1	0.9	0.43	0.27	-0.16	0.0603457	0.171242	0.442232	67	17	2	99.8	91.3	No matches found	Multiple matches found	No matches found	No matches found	ddMS2 for preferred ion	C4 H9 N O2_ppm:-3.16_Ifit:88MatchedIso.:5	Desmethylenylnocardamine_simScore:63; 2-{4-[2-(Trifluoromethyl)quinolin-4-yl]piperazino}ethan-1-ol_simScore:63.7; Tilmicosin_simScore:68.3; Hydroxyacetildenafil_simScore:74.6; Triethanolamine_simScore:75.1; Tylosin_simScore:77; Spiramycin_simScore:84.6; Isopropyl myristate_score:94.7; Methyl palmitate_score:98.3; Diethanolamine_score:99.5; Υ-Aminobutyric acid (GABA)_score:99.8	Gamma-Aminobutyric acid_score:91.3	67028775_:2-(Hydroxyamino)-2-methylpropanal_ppm:0_mzLogicScore:43; 67038495_:1,3,2-Dioxazepane_ppm:0_mzLogicScore:48; 67173409_:1,5,3-Dioxazepane_ppm:0_mzLogicScore:32; 67170584_:N-Hydroxytetrahydro-2-furanamine_ppm:0_mzLogicScore:56; 9994972_:(1E)-Butylideneazinic acid_ppm:0_mzLogicScore:37; 61041724_:N-(1-Hydroxyethyl)-N-methylformamide_ppm:0_mzLogicScore:38; 2282993_:(Methylamino)methyl acetat…		~same in all; one E+ rep up
196.058	C6 H12 O7	12.59	Gluconic acid	500000	200000	200000	60	1	45	0.4	0.3	0.8	-1.37	-1.73	-0.37	0.274279	0.14366	0.751131	17	5	1	98.1	91	No matches found	Single match found	No matches found	No matches found	ddMS2 for preferred ion	C3 H4 N10 O_ppm:4.54_Ifit:58MatchedIso.:2; C10 H14 P2_ppm:3.93_Ifit:66MatchedIso.:2; C6 H12 O7_ppm:-2.34_Ifit:91MatchedIso.:2	1,7-Dimethyluric acid_score:79.6; 1,3-Dimethyluric acid_score:79.7; 3,7-Dimethyluric acid_score:80.2; Galactonic acid_score:85.6; Gluconic acid_score:98.1	D-Gluconic acid_score:91	29322575_:(2E)-[(2R,3S,4R,5R)-2,3,4,5,6-Pentahydroxyhexylidene]dioxidan-2-ium-1-ide_ppm:0_mzLogicScore:85; 66424486_:(2R,3R,4S,5S,6R)-1,1,2,3,4,5,6-Cyclohexaneheptol_ppm:0_mzLogicScore:73; 9654294_:(2xi)-D-arabino-Hexonic acid_ppm:0_mzLogicScore:91; 388973_:2-carboxy-D-arabinitol_ppm:0_mzLogicScore:78; 2496798_:D-Talonic acid_ppm:0_mzLogicScore:91; 29369693_:(3R,4S,5S,6R)-6-(Hydroxymethyl)tetrahy…		~same in all; one C rep up
147.053	C5 H9 N O4	9.47	Glutamate	900000	2000000	800000	55.5556	20	25	2	0.9	0.5	0.83	-0.18	-1.01	0.359872	0.990614	0.319656	56	5	0			No matches found	No matches found	No matches found	Single match found	ddMS2 for preferred ion	C5 H9 N O4_ppm:-1.54_Ifit:75MatchedIso.:4	1H-Benzotriazole-5-carboxylic acid_simScore:84.2; 2-{[5-Hydroxy-4-(3-pyridinyl)-4H-1,2,4-triazol-3-yl]sulfanyl}-N-phenylacetamide_simScore:84.2; 2-(1H-1,2,3-Benzotriazol-1-yl)-N'-(2-thienylmethylene)acetohydrazide_simScore:84.5; O1-[4-(Trifluoromethoxy)benzoyl]-2-(3-cyclopropyl-3H-imidazo[4,5-b]pyridin-2-yl)ethanehydroximamide_simScore:91.5; N-(4,6-Dimethyl-2-pyrimidinyl)-4-[(E)-(2-hydroxybenzyli…		67038194_:2-(2-Oxiranyl)-2-propanyl nitrate_ppm:0_mzLogicScore:9; 67497631_:2-(2-Oxetanyl)ethyl nitrate_ppm:0_mzLogicScore:9; 67162624_:2-(3-Oxetanyl)ethyl nitrate_ppm:0_mzLogicScore:9; 14580130_:2-Methyl-5-nitro-1,3-dioxane_ppm:0_mzLogicScore:11; 62947949_:[(3-Hydroxypropyl)amino](oxo)acetic acid_ppm:0_mzLogicScore:18; 61805390_:2-Hydroxycyclopentyl nitrate_ppm:0_mzLogicScore:9; 59664338_:N-[(2S…	Glutamate,ΔRT:-1.36	~same in all, multiple peaks, messy
146.069	C5 H10 N2 O3	12.973	Glutamine	100000000	90000000	40000000	30	5.55556	50	0.9	0.4	0.5	-0.08	-1.16	-1.07	0.994841	0.208477	0.226811	50	24	0	99.7		No matches found	No matches found	No matches found	Multiple matches found	ddMS2 for preferred ion	C5 H10 N2 O3_ppm:-2.45_Ifit:54MatchedIso.:5	D-(-)-Glutamine_score:98.6; DL-Glutamine_score:99.7		67033647_:5-Amino-4-hydroxy-4-nitrosopentanal_ppm:0_mzLogicScore:63; 16120135_:4-Hydroxy-1-piperazinecarboxylic acid_ppm:0_mzLogicScore:19; 19986982_:Nitrosooxopropylethanolamine_ppm:0_mzLogicScore:63; 67162371_:1-(1,3-Dihydroxy-2-imidazolidinyl)ethanone_ppm:0_mzLogicScore:28; 67161945_:Aminoacetyl L-alaninate_ppm:0_mzLogicScore:53; 26949302_:3-Hydroxy-1-piperazinecarboxylic acid_ppm:0_mzLogicSco…	glutamine,ΔRT:-0.84; glutamine,ΔRT:-1.87	~same in all Rxes
172.013	C3 H9 O6 P	14.034	glycerophosphate	200000	70000	6000	100	14.2857	16.6667	0.3	0.03	0.08	-1.7	-5.27	-3.57	0.369751	0.0211861	0.0509435	14	0	0			No matches found	No matches found	No matches found	Single match found	ddMS2 for preferred ion	C6 H8 N2 S2_ppm:2.32_Ifit:56MatchedIso.:2; C3 H9 O6 P_ppm:-2.24_Ifit:74MatchedIso.:2			62777911_:2-(Dimethylamino)-6H-1,3-thiazine-6-thione_ppm:0_mzLogicScore:18; 520754_:N-[(2Z)-3-Methyl-1,3-thiazol-2(3H)-ylidene]ethanethioamide_ppm:0_mzLogicScore:21; 520660_:2,6-Pyrazinediyldimethanethiol_ppm:0_mzLogicScore:20; 11368554_:4,4',5,5'-Tetrahydro-2,2'-bi-1,3-thiazole_ppm:0_mzLogicScore:12; 363840_:2-Thienylmethyl carbamimidothioate_ppm:0_mzLogicScore:9; 3145088_:2-(Allylsulfanyl)-5-me…	glycerophosphate,ΔRT:-0.87	Present in C, E-, absent in E+
257.102	C8 H20 N O6 P	12.52	Glycerophosphocholine	20000	20000	200000	15	5	25	2	10	9	0.6	3.74	3.14	0.210684	0.00182085	0.00306972	38	1	1		91.5	No matches found	Single match found	No matches found	No matches found	ddMS2 for preferred ion	C11 H19 N3 S2_ppm:0.27_Ifit:41MatchedIso.:2; C8 H20 N O6 P_ppm:-2.78_Ifit:88MatchedIso.:2; C10 H15 N3 O5_ppm:3.65_Ifit:91MatchedIso.:2; C11 H11 N7 O_ppm:-1.55_Ifit:86MatchedIso.:2	Choline_score:98.2	Glycerophosphocholine_score:91.5	67033688_:2-Amino-5-methyl-1-(beta-D-xylofuranosyl)-4(1H)-pyrimidinone_ppm:-0.001_mzLogicScore:NA; 29354171_:1,4-Di-O-acetyl-3-azido-2,3,6-trideoxy-beta-L-lyxo-hexopyranose_ppm:-0.001_mzLogicScore:NA; 67492449_:4-Amino-1-(3-deoxy-beta-D-erythro-hex-2-ulofuranosyl)-2(1H)-pyrimidinone_ppm:-0.001_mzLogicScore:NA; 19201287_:4-Amino-1-[(5xi)-6-deoxy-beta-D-ribo-hexofuranosyl]-2(1H)-pyrimidinone_ppm:-0…		present in all samples, but very low in E- and C
283.091	C10 H13 N5 O5	11.368	Guanosine	400000	100000	2000000	50	10	35	0.2	5	20	-2.06	2.21	4.27	0.067234	0.048998	0.00855145	36	7	1		73.4	No matches found	Single match found	No matches found	No matches found	ddMS2 for preferred ion	C12 H18 N3 O P S_ppm:0.24_Ifit:41MatchedIso.:2; C10 H21 N O4 S2_ppm:-1.1_Ifit:42MatchedIso.:2; C9 H17 N O9_ppm:1.97_Ifit:91MatchedIso.:2; C10 H13 N5 O5_ppm:-2.76_Ifit:69MatchedIso.:3	P1,P4-Bis(5'-guanosyl) tetraphosphate_simScore:93.8; Penciclovir_simScore:94; Acycloguanosine_simScore:94.1; 2'-O-Methylguanosine_simScore:94.1; 2'-Deoxyguanosine_simScore:94.1; Guanine_simScore:94.1; Guanosine 5'-diphosphate (GDP)_simScore:94.1	Guanosine_score:73.4	67036893_:N-(6-Oxo-6,7-dihydro-1H-purin-2-yl)-D-arabinofuranosylamine_ppm:0.001_mzLogicScore:32; 65999250_:2-Amino-9-(beta-D-arabinopyranosyl)-1,9-dihydro-6H-purin-6-one_ppm:0.001_mzLogicScore:42; 58837243_:1-Hydroxyadenosine_ppm:0.001_mzLogicScore:37; 66000946_:2'-Deoxy-8-oxo-7,8-dihydroguanosine_ppm:0.001_mzLogicScore:26; 67169379_:(2xi)-2'-Azidothymidine_ppm:0.001_mzLogicScore:27; 21109026_:5'…		Highest in E+, but looks present in E- and C as well
111.079	C5 H9 N3	16.815	Histamine	7000000	6000000	7000000	7.14286	0.5	28.5714	0.8	0.9	1	-0.28	-0.12	0.15	0.565063	0.822992	0.872325	30	12	0	99		No matches found	No matches found	No matches found	No matches found	ddMS2 for preferred ion	C5 H9 N3_ppm:-3.45_Ifit:84MatchedIso.:3	JWH 018 N-(5-hydroxypentyl) β-D-Glucuronide_simScore:85.4; JWH 018 7-hydroxyindole metabolite_simScore:86.5; UR-144 N-(5-Bromopentyl) analog_simScore:88.3; Creatinine_score:76.1; Histamine_score:99		67032884_:1,2-Dihydro-2,4-pyridinediamine_ppm:0_mzLogicScore:44; 67025023_:1,2,3,5,6,6a-Hexahydropyrrolo[3,4-c]pyrazole_ppm:0_mzLogicScore:40; 67025385_:1,2,4,5,6,6a-Hexahydrocyclopenta[d][1,2,3]triazole_ppm:0_mzLogicScore:30; 67170423_:5-Methyl-2,3-dihydro-4-pyrimidinamine_ppm:0_mzLogicScore:40; 67165030_:4-Cyclopropyl-4,5-dihydro-1H-1,2,3-triazole_ppm:0_mzLogicScore:30; 62978472_:(3E)-3-(Dimeth…		~same in all; reps don't agree well
155.069	C6 H9 N3 O2	12.679	Histidine	40000000	40000000	20000000	2.5	25	50	0.9	0.6	0.7	-0.15	-0.77	-0.62	0.93101	0.317147	0.440704	56	5	0	99.9		No matches found	No matches found	No matches found	No matches found	ddMS2 for preferred ion	C6 H9 N3 O2_ppm:-2.34_Ifit:68MatchedIso.:5	L-Histidine_score:99.9		67033291_:Hexahydroimidazo[1,2-a]pyrazine-5,6-dione_ppm:0_mzLogicScore:18; 67027486_:6-(Methoxyamino)-1-methyl-2(1H)-pyrimidinone_ppm:0_mzLogicScore:26; 67027945_:4-[Methoxy(methyl)amino]-2(1H)-pyrimidinone_ppm:0_mzLogicScore:26; 66738672_:N-1H-Pyrazol-1-yl-L-alanine_ppm:0_mzLogicScore:33; 67175059_:4-(1,2,5-Oxadiazol-3-yl)morpholine_ppm:0_mzLogicScore:18; 67170558_:1,3a,4,5,6,6a-Hexahydropyrrolo…		~same in all; reps don't agree well
131.058	C5 H9 N O3	11.955	hydroxyproline	30000	30000	80000	3.33333	23.3333	25	1	2	2	0.05	1.3	1.24	0.990297	0.039285	0.0424694	74	9	0			No matches found	No matches found	No matches found	Single match found	ddMS2 for preferred ion	C5 H9 N O3_ppm:-2.32_Ifit:86MatchedIso.:2	6-Aminocaproic acid_simScore:66.9; Triethanolamine_simScore:75.1; Glycyl-L-leucine_simScore:78.4; Actinomycin D_simScore:81.6; N-Acetyl-L-leucine_score:54.3; L-Norleucine_score:99.8; Isoleucine_score:99.8; Leucine_score:99.9		11526456_:4-amino-4-oxo-pentanoate_ppm:0_mzLogicScore:37; 67039241_:2-Methyl-3-buten-2-yl nitrate_ppm:0_mzLogicScore:20; 67038736_:(2E)-2-(Hydroxyimino)propyl acetate_ppm:0_mzLogicScore:22; 16188812_:4,4-Dimethoxy-4,5-dihydro-1,3-oxazole_ppm:0_mzLogicScore:21; 66738560_:4-Hydroxy-3-(hydroxymethyl)-2-butenamide_ppm:0_mzLogicScore:22; 66001276_:5-Hydroxy-4,5-dimethyl-1,2-oxazolidin-3-one_ppm:0_mzLo…	hydroxyproline,ΔRT:-0.29	Highest in E+, present in C and E-; peak unique to E+ also present
136.038	C5 H4 N4 O	10.018	Hypoxanthine	8000000	10000000	20000000	5	80	45	2	2	1	0.67	0.97	0.3	0.823108	0.600112	0.903118	40	2	0	97.5		No matches found	No matches found	No matches found	No matches found	ddMS2 for preferred ion	C5 H4 N4 O_ppm:-2.2_Ifit:86MatchedIso.:4	Allopurinol_score:99.7; Hypoxanthine_score:99.9		67175942_:[1,2,4]Triazolo[1,5-a]pyrimidin-1-ium-6-olate_ppm:0_mzLogicScore:30; 67172011_:[1,2,4]Triazolo[4,3-a]pyrimidin-5(3H)-one_ppm:0_mzLogicScore:42; 67498029_:1H-[1,2,3]Triazolo[4,5-b]pyridine 2-oxide_ppm:0_mzLogicScore:9; 67164957_:4-Amino-2-oxo-1(2H)-pyrimidinecarbonitrile_ppm:0_mzLogicScore:27; 67028797_:(1,3,5-Triazin-2-yloxy)acetonitrile_ppm:0_mzLogicScore:6; 67033459_:2H-[1,2,3]Triazol…		~same in all; up in one E+ rep
126.043	C5 H6 N2 O2	10.491	Imidazoleacetic acid	2000000	2000000	4000000	1	10	25	0.8	2	3	-0.41	0.98	1.39	0.443433	0.0995479	0.0396156	74	2	0	98.6		No matches found	No matches found	No matches found	No matches found	ddMS2 for preferred ion	C5 H6 N2 O2_ppm:-2.4_Ifit:81MatchedIso.:4	Imidazoleacetic acid_score:98.6		67028476_:(2E)-2-Cyano-3-hydroxy-2-butenamide_ppm:0_mzLogicScore:NA; 67028102_:1-(3-Oxido-4H-imidazol-5-yl)ethanone_ppm:0_mzLogicScore:NA; 67154432_:(4E)-4-(Hydroxyimino)-3,4-dihydro-2(1H)-pyridinone_ppm:0_mzLogicScore:NA; 10797221_:3-Methyl-1H-pyrazole-1-carboxylic acid_ppm:0_mzLogicScore:NA; 67174083_:2H-1,2-Oxazine-3-carboxamide_ppm:0_mzLogicScore:NA; 67169654_:(5Z,7Z)-2,3-Dihydro-4H-1,2,3-oxa…		Highest in E+, present in C and E-; peak unique to E+ also present
268.08	C10 H12 N4 O5	10.018	Inosine	10000000	20000000	30000000	10	100	66.6667	2	2	1	0.64	0.78	0.14	0.881785	0.798968	0.983348	19	3	3	99.6	83.1	No matches found	Multiple matches found	No matches found	Single match found	ddMS2 for preferred ion	C10 H20 O4 S2_ppm:-0.43_Ifit:32MatchedIso.:4; C10 H12 N4 O5_ppm:-2.18_Ifit:64MatchedIso.:5	Inosine_score:99.6	Inosine_score:83.1	10573930_:(1xi)-1,4-Anhydro-1-(6-oxo-6,7-dihydro-1H-purin-2-yl)-D-ribitol_ppm:0.001_mzLogicScore:46; 65792511_:(1xi)-1,4-Anhydro-1-(6-oxo-6,7-dihydro-1H-purin-2-yl)-D-arabinitol_ppm:0.001_mzLogicScore:46; 66423822_:(1xi)-1,5-Anhydro-1-(6-oxo-6,7-dihydro-1H-purin-2-yl)-D-arabinitol_ppm:0.001_mzLogicScore:46; 10468637_:(4E)-4-[(2,4-Dinitrophenyl)hydrazono]-1-butanol_ppm:0.001_mzLogicScore:15; 24654…	Inosine (Ino),ΔRT:-1.04	~same in all; reps don't agree well
131.094	C6 H13 N O2	9.98	Isoleucine	20000000	10000000	20000000	20	9	50	0.7	0.9	1	-0.61	-0.2	0.41	0.677675	0.832367	0.951369	102	8	0	99.5		No matches found	No matches found	No matches found	Multiple matches found	ddMS2 for preferred ion	C6 H13 N O2_ppm:-2.37_Ifit:55MatchedIso.:5	L-Isoleucine_score:99.5; L-Norleucine_score:99.8; Isoleucine_score:99.8; Leucine_score:99.9		61468284_:3-Hydroxyhexanamide_ppm:0_mzLogicScore:17; 10814141_:2-(1,2-Dioxolan-3-yl)-N-methylethanamine_ppm:0_mzLogicScore:17; 38008318_:N-Methoxypentanamide_ppm:0_mzLogicScore:17; 32971243_:2-Amino-1,5-anhydro-2,4-dideoxy-3-C-methylpentitol_ppm:0_mzLogicScore:21; 2555869_:3,3,5-Trimethyl-1,2-oxazolidin-5-ol_ppm:0_mzLogicScore:17; 32982172_:3-Ethoxybutanamide_ppm:0_mzLogicScore:14; 479863_:5-Amin…	Leucine,ΔRT:-1.28; Isoleucine,ΔRT:-0.77	~same in all; up in one E+ rep
208.084	C10 H12 N2 O3	9.858	Kynurenine	1000000	700000	700000	0.6	11.4286	71.4286	0.7	0.7	1	-0.47	-0.45	0.01	0.774196	0.623069	0.954268	74	1	1	99.3	92.7	No matches found	Single match found	No matches found	No matches found	ddMS2 for preferred ion	C4 H13 N6 O2 P_ppm:2.21_Ifit:100MatchedIso.:1; C10 H12 N2 O3_ppm:-2.75_Ifit:80MatchedIso.:2	L-Kynurenine_score:99.3	L-Kynurenine_score:92.7	67030321_:4,5-Dimethoxy-1-methyl-1,3-dihydro-2H-benzimidazol-2-one_ppm:0.001_mzLogicScore:43; 67039066_:O-[(E)-Benzylideneamino]-L-serine_ppm:0.001_mzLogicScore:46; 67024544_:Methyl 4-{[(1Z)-1-cyano-1-propen-2-yl]amino}-2-methylene-4-oxobutanoate_ppm:0.001_mzLogicScore:42; 14795798_:4-Amino-2-isonicotinoylbutanoic acid_ppm:0.001_mzLogicScore:59; 67175715_:Ethyl 4-oxo-4,5,6,7-tetrahydro-1H-indazol…		~same in all; reps don't agree well
90.0317	C3 H6 O3	7.949	Lactic acid	20000000	20000000	20000000	25	5	1.5	1	0.9	0.7	0.33	-0.09	-0.42	0.39291	0.959859	0.30655	23	6	0	99.9		No matches found	No matches found	No matches found	No matches found	ddMS2 for preferred ion	C3 H6 O3_ppm:0.17_Ifit:34MatchedIso.:2	DL-Lactic Acid_score:99.8; L-(+)-Lactic acid_score:99.9		61714322_:(2R)-2-(Hydroxymethyl)-2-oxiranol_ppm:0_mzLogicScore:NA; 10820349_:1-Hydroperoxyacetone_ppm:0_mzLogicScore:NA; 14214411_:2,2-Dihydroxypropanal_ppm:0_mzLogicScore:NA; 24590985_:3-Methyl-1,2,4-trioxolane_ppm:0_mzLogicScore:NA; 11312286_:1,2,3-Trioxane_ppm:0_mzLogicScore:NA; 128014_:Hydroxymethyl acetate_ppm:0_mzLogicScore:NA; 10629025_:1,2,4-Trioxane_ppm:0_mzLogicScore:NA; 62612_:Glycol m…		~same in all
131.094	C6 H13 N O2	9.745	Leucine	40000000	20000000	30000000	10	1.5	66.6667	0.6	0.9	1	-0.63	-0.19	0.44	0.464718	0.82102	0.764581	102	12	0	99.9		No matches found	No matches found	No matches found	Multiple matches found	ddMS2 for preferred ion	C6 H13 N O2_ppm:-2.17_Ifit:56MatchedIso.:5	L-Isoleucine_score:99.5; L-Norleucine_score:99.8; Isoleucine_score:99.8; Leucine_score:99.9		61468284_:3-Hydroxyhexanamide_ppm:0_mzLogicScore:NA; 10814141_:2-(1,2-Dioxolan-3-yl)-N-methylethanamine_ppm:0_mzLogicScore:NA; 38008318_:N-Methoxypentanamide_ppm:0_mzLogicScore:NA; 32971243_:2-Amino-1,5-anhydro-2,4-dideoxy-3-C-methylpentitol_ppm:0_mzLogicScore:NA; 2555869_:3,3,5-Trimethyl-1,2-oxazolidin-5-ol_ppm:0_mzLogicScore:NA; 32982172_:3-Ethoxybutanamide_ppm:0_mzLogicScore:NA; 479863_:5-Amin…	Leucine,ΔRT:-1.05; Isoleucine,ΔRT:-0.53	~same in all; reps don't agree well
130.11	C6 H14 N2 O	9.846	Leucineamide	100000	80000	600000	40	62.5	50	0.6	4	7	-0.8	1.91	2.71	0.538314	0.191853	0.0768517	54	1	0	97.4		No matches found	No matches found	No matches found	No matches found	ddMS2 for preferred ion	C6 H14 N2 O_ppm:-2.46_Ifit:92MatchedIso.:2	DL-Leucineamide_score:97.4		19985727_:N-Nitrosomethylisoamylamine_ppm:0_mzLogicScore:22; 67024236_:6-Nitroso-1-hexanamine_ppm:0_mzLogicScore:15; 67025688_:(3R,4S)-3-(Aminomethyl)-4-piperidinol_ppm:0_mzLogicScore:18; 66737794_:N-Methyl-5-nitroso-1-pentanamine_ppm:0_mzLogicScore:18; 67171750_:1-[(2R)-2-Butanyl]-3-methylurea_ppm:0_mzLogicScore:22; 11196352_:1-(2-Morpholinyl)ethanamine_ppm:0_mzLogicScore:22; 67159282_:N-(2-Nitr…		Present in all 3, E+ is highest
280.24	C18 H32 O2	2.078	Linoelaidic acid	10000000	5000000	5000000	20	16	40	0.5	0.5	1	-1	-0.97	0.03	0.123725	0.122265	0.999873	89	3	0	96		No matches found	No matches found	No matches found	No matches found	ddMS2 for preferred ion	C18 H32 O2_ppm:-0.99_Ifit:42MatchedIso.:2	9(Z),11(E)-Conjugated linoleic acid_score:96; Linoleic acid_score:96; Linoelaidic acid_score:96		67029332_:(8E,10E)-12-Hydroxy-8,10-octadecadien-2-one_ppm:0_mzLogicScore:27; 67037629_:(10E,12E)-10,12-Hexadecadien-1-yl acetate_ppm:0_mzLogicScore:27; 67154718_:Ethyl (11Z,13Z)-11,13-hexadecadienoate_ppm:0_mzLogicScore:26; 67175965_:(3E)-1,3-Hexadecadien-6-yl acetate_ppm:0_mzLogicScore:25; 67490421_:(3E,11E)-3,11-Hexadecadien-1-yl acetate_ppm:0_mzLogicScore:23; 67160388_:Methyl (2E,4E)-2,4-hepta…		~same in all; reps don't agree well
134.021	C4 H6 O5	14.856	Malic acid	900000	600000	500000	88.8889	10	40	0.6	0.5	0.8	-0.62	-1.02	-0.4	0.930679	0.672984	0.857442	11	13	0	95.1		No matches found	No matches found	No matches found	Single match found	ddMS2 for preferred ion	C4 H6 O5_ppm:-1.47_Ifit:91MatchedIso.:3	4-Allyl-1,2-diphenyl-3,5-pyrazolidinedione_simScore:84.4; 1-(2-Chloro-6-fluorobenzyl)-1,2,3,4-tetrahydro-2λ6,1-benzothiazine-2,2,4-trione_simScore:84.4; N-Benzyl-5-methoxy-1H-indole-2-carboxamide_simScore:84.4; N-Cyclohexyl-2-(2-furylmethyl)-3-oxo-1-isoindolinecarboxamide_simScore:84.4; 3-(1,3-Benzodioxol-5-yl)-2-(benzoylamino)acrylic acid_simScore:84.4; DL-5-Methoxytryptophan_simScore:84.4; Phen…		45403142_:2-Hydroxy-3-methoxy-3-oxopropanoic acid_ppm:0_mzLogicScore:38; 388930_:3-dehydro-L-threonic acid_ppm:0_mzLogicScore:53; 9415536_:Ethyl hydrogen dicarbonate_ppm:0_mzLogicScore:17; 69486_:4-Hydroperoxy-4-oxobutanoic acid_ppm:0_mzLogicScore:53; 67024492_:4-Hydroxy-4-(1-hydroxyethyl)-1,3-dioxetan-2-one_ppm:0_mzLogicScore:28; 120158_:Isomalic acid_ppm:0_mzLogicScore:38; 2976_:Velcorin_ppm:0_…	Malate,ΔRT:-1.03	~same in all; one C rep up
149.051	C5 H11 N O2 S	10.147	Methionine	600000	500000	200000	5	1	50	0.8	0.2	0.3	-0.31	-2.01	-1.7	0.870065	0.0714897	0.103342	21	2	0			No matches found	No matches found	No matches found	Single match found	ddMS2 for preferred ion	C5 H11 N O2 S_ppm:-0.51_Ifit:41MatchedIso.:2	1-(4,7-Dimethylpyrazolo[5,1-c][1,2,4]triazin-3-yl)ethan-1-one_simScore:89.9		15629240_:Amino(isopropylsulfanyl)acetic acid_ppm:0_mzLogicScore:21; 65791618_:(3S)-3-Amino-5-sulfanylpentanoic acid_ppm:0_mzLogicScore:26; 66737862_:(2S)-Amino(isopropylsulfanyl)acetic acid_ppm:0_mzLogicScore:21; 67036482_:4-Sulfanyl-L-isovaline_ppm:0_mzLogicScore:25; 7863497_:Propionaldehyde, 2-methyl-2-(methylsulfinyl)-, oxime_ppm:0_mzLogicScore:22; 10752282_:3-Sulfanylisovaline_ppm:0_mzLogicS…	Methionine,ΔRT:-0.69	Highest in C, present in E- and E+
165.045	C5 H11 N O3 S	11.462	Methionine sulfoxide	30000000	30000000	6000000	6.66667	30	33.3333	1	0.2	0.2	0.03	-2.27	-2.3	0.999998	0.0215822	0.0215625	23	2	0	99.7		No matches found	No matches found	No matches found	No matches found	ddMS2 for preferred ion	C7 H8 N3 P_ppm:-1.05_Ifit:31MatchedIso.:2; C5 H11 N O3 S_ppm:-3.36_Ifit:72MatchedIso.:6	Methionine sulfoxide_score:97.3; L-Methionine sulfoxide_score:99.7		67029978_:2-Amino-3-methyl-4-oxo-1-butanesulfinic acid_ppm:0.001_mzLogicScore:63; 65325881_:5,5-Dimethyl-1,2,3-oxathiazinane 2,2-dioxide_ppm:0.001_mzLogicScore:28; 57558107_:N-Hydroxy-L-methionine_ppm:0.001_mzLogicScore:84; 474491_:N-(2-Oxobutyl)methanesulfonamide_ppm:0.001_mzLogicScore:32; 7876295_:Propionaldehyde, 2-methyl-2-(methylsulfonyl)-, oxime_ppm:0.001_mzLogicScore:42; 477235_:2-(Aminoox…		Highest in C and E-, present but low in E+
161.068	C6 H11 N O4	9.807	Methyl 2-[(2-methoxy-2-oxoethyl)amino]acetate	5000	200000	1000000	20	10	80	40	200	6	5.17	7.69	2.51	0.0108637	0.00377933	0.0954303	71	1	0	88.8		No matches found	No matches found	No matches found	No matches found	ddMS2 for preferred ion	C6 H11 N O4_ppm:-2.55_Ifit:59MatchedIso.:3	Methyl 2-[(2-methoxy-2-oxoethyl)amino]acetate_score:88.8		67032714_:(Nitroperoxy)cyclohexane_ppm:0_mzLogicScore:20; 66738015_:2-[(1-Hydroxyethyl)amino]-3-oxobutanoic acid_ppm:0_mzLogicScore:36; 67178319_:5,5-Bis(hydroxymethyl)-2-morpholinone_ppm:0_mzLogicScore:36; 67167087_:2-[(2-Hydroxyethyl)amino]-3-oxobutanoic acid_ppm:0_mzLogicScore:39; 15256596_:N-(3,4-Dihydroxy-1-oxo-2-butanyl)acetamide_ppm:0_mzLogicScore:35; 65998988_:(2R)-2-Hydroxypropanoyl D-al…		Only in E+, E-
148.074	C6 H12 O4	6.758	Mevalonic acid	100000	20000	500000	200	10	140	0.1	4	30	-3.07	1.86	4.92	0.811096	0.960981	0.672156	91	2	0	56.2		No matches found	No matches found	No matches found	No matches found	ddMS2 for preferred ion	C6 H12 O4_ppm:-0.09_Ifit:88MatchedIso.:2	Mevalonic acid_score:56.2		67037193_:1,1,4,4-Cyclohexanetetrol_ppm:0_mzLogicScore:25; 65998996_:3-Hydroxy-2-methylpropyl methyl carbonate_ppm:0_mzLogicScore:25; 65998282_:4,6-Dideoxy-L-xylo-hexopyranose_ppm:0_mzLogicScore:32; 67024077_:Dihydroxymethyl valerate_ppm:0_mzLogicScore:28; 67025719_:2-(Dihydroxymethyl)pentanoic acid_ppm:0_mzLogicScore:31; 66001297_:(3R,4S)-3,4-Diethoxy-1,2-dioxetane_ppm:0_mzLogicScore:12; 6717008…		Only in one E+, one C
173.105	C8 H15 N O3	9.953	N-Acetyl-L-leucine	80000	60000	200000	25	3.33333	10	0.8	2	3	-0.37	1.2	1.57	0.452789	0.0322046	0.0163446	70	1	0	54.3		No matches found	No matches found	No matches found	No matches found	ddMS2 for preferred ion	C8 H15 N O3_ppm:-2.54_Ifit:72MatchedIso.:2	N-Acetyl-L-leucine_score:54.3		67038784_:(2Z)-5-Hydroxy-2-(2-hydroxyethyl)-3-methyl-2-pentenamide_ppm:0_mzLogicScore:30; 67177489_:4-(Butyryloxy)morpholine_ppm:0_mzLogicScore:25; 67177696_:5-{[2-(Vinyloxy)ethoxy]methyl}-1,3-oxazolidine_ppm:0_mzLogicScore:30; 24223370_:N-Acetyl-N-methyl-L-valine_ppm:0_mzLogicScore:47; 57485510_:Methyl N-formylisoleucinate_ppm:0_mzLogicScore:48; 30774149_:Ethyl 1,4-oxazepane-3-carboxylate_ppm:0_…		Present in E+ (low abundance), also in C, probably not in E-
195.089	C10 H13 N O3	8.715	N-Acetyldopamine	900000	400000	100000	44.4444	22.5	60	0.5	0.1	0.3	-1.08	-2.96	-1.89	0.2965	0.0258442	0.0779879	149	2	0	90.3		No matches found	No matches found	No matches found	No matches found	ddMS2 for preferred ion	C10 H13 N O3_ppm:-1.96_Ifit:82MatchedIso.:3	N-Acetyldopamine_score:90.3		514993_:(5-Ethoxy-2-pyridinyl)methyl acetate_ppm:0_mzLogicScore:17; 515260_:3-Isopropoxy-4-nitrotoluene_ppm:0_mzLogicScore:23; 527578_:Methoxynitromesitylene_ppm:0_mzLogicScore:23; 509628_:2-Hydroxy-2-(4-methoxyphenyl)-N-methylacetamide_ppm:0_mzLogicScore:31; 502516_:beta-Methoxyphenylalanine_ppm:0_mzLogicScore:26; 14365591_:Benzyl 3-amino-2-hydroxypropanoate_ppm:0_mzLogicScore:20; 527510_:2-(4-M…		C highest, E+ lowest. Only saying maybe interesting because putatively acetyldopamine
153.09	C7 H11 N3 O	8.206	N-Acetylhistamine	3000000	1000000	1000000	16.6667	20	4	0.4	0.5	1	-1.17	-0.96	0.22	0.020554	0.036612	0.571255	23	6	0	94		No matches found	No matches found	No matches found	No matches found	ddMS2 for preferred ion	C7 H11 N3 O_ppm:-2.44_Ifit:49MatchedIso.:3	2-Amino-3,5,6-trimethyl-3,4-dihydropyrimidin-4-one_score:58.1; N-Acetylhistamine_score:94		67036103_:3-Amino-2-oxo-3-azepanecarbonitrile_ppm:0_mzLogicScore:51; 65998195_:4,6-Diethyl-1,2,3-triazin-5-ol_ppm:0_mzLogicScore:18; 67034464_:3,4,4a,5,6,7-Hexahydropyrido[4,3-d]pyrimidin-2(1H)-one_ppm:0_mzLogicScore:55; 19993614_:3-Amino-4-(1H-imidazol-2-yl)-2-butanone_ppm:0_mzLogicScore:42; 4710554_:cyclohex-2-en-1-one semicarbazone_ppm:0_mzLogicScore:27; 464808_:4-(1-Pyrrolidinyl)-1,5-dihydro-…		up in C
174.1	C7 H14 N2 O3	13.068	N-Acetylornithine	20000	20000	200000	40	25	25	0.7	9	10	-0.5	3.11	3.6	0.570549	0.0113181	0.00749626	45	1	0	89.1		No matches found	No matches found	No matches found	No matches found	ddMS2 for preferred ion	C7 H14 N2 O3_ppm:-2.46_Ifit:78MatchedIso.:2	N-Acetylornithine_score:89.1		58837229_:N-[(2S)-2-Pyrrolidinylmethoxy]glycine_ppm:0_mzLogicScore:43; 67026614_:N,N,4,4-Tetramethyl-1,3,2-dioxazolidine-2-carboxamide_ppm:0_mzLogicScore:22; 67491468_:N-Carbamoyl-D-isoleucine_ppm:0_mzLogicScore:71; 13600398_:N~2~-Formyllysine_ppm:0_mzLogicScore:71; 65791819_:(2S)-2,5-Diamino-6-oxoheptanoic acid_ppm:0_mzLogicScore:63; 19993991_:N-(4,5-Dihydroxy-3-piperidinyl)acetamide_ppm:0_mzLog…		only in E+
202.143	C8 H18 N4 O2	16.269	N,N-Dimethylarginine	400000	600000	2000000	5	33.3333	50	2	7	4	0.81	2.74	1.93	0.341506	0.0213629	0.0544221	16	1	1	90.1	88.2	No matches found	Single match found	No matches found	No matches found	ddMS2 for preferred ion	C8 H18 N4 O2_ppm:-2.03_Ifit:76MatchedIso.:4	N3,N4-Dimethyl-L-arginine_score:90.1	N,N-Dimethylarginine_score:88.2	10750256_:N~2~-Ethylarginine_ppm:0_mzLogicScore:43; 67155398_:Methyl N~2~-methyl-L-argininate_ppm:0_mzLogicScore:43; 8305932_:Ethyl N~5~-(diaminomethylene)-D-ornithinate_ppm:0_mzLogicScore:59; 4932255_:Methyl N~6~-(diaminomethylene)lysinate_ppm:0_mzLogicScore:43; 8483406_:N~5~-(Diaminomethylene)-N~2~-ethyl-L-ornithine_ppm:0_mzLogicScore:59; 10465923_:3,3'-(1,2-Ethanediyldiimino)dipropanamide (non…		Highest in E+, also present in C and E-
188.152	C9 H20 N2 O2	16.827	N6,N6,N6-Trimethyl-L-lysine	60000	100000	400000	33.3333	20	100	2	7	4	0.88	2.83	1.96	0.624304	0.131998	0.311204	17	2	0	66.3		No matches found	No matches found	No matches found	No matches found	ddMS2 for preferred ion	C9 H20 N2 O2_ppm:-2.81_Ifit:81MatchedIso.:2	N6,N6,N6-Trimethyl-L-lysine_score:66.3		67037413_:(4Z)-N-Hydroxy-4-(hydroxyimino)-N-isopropyl-2-methyl-2-pentanamine_ppm:0.001_mzLogicScore:31; 65792271_:(2S)-2,6-Diamino-2,6-dimethylheptanoic acid_ppm:0.001_mzLogicScore:43; 67490562_:8,8-Diaminononanoic acid_ppm:0.001_mzLogicScore:36; 67178237_:2,5-Diamino-1,2,5,6-tetradeoxy-3,4-O-isopropylidene-L-threo-hexitol_ppm:0.001_mzLogicScore:30; 65792389_:2,6-Diamino-2,6-dimethylheptanoic aci…		Highest in E+, but reps don't agree very well
122.048	C6 H6 N2 O	17.901	Nicotinamide	200000	90000	600000	25	22.2222	50	0.5	3	7	-1.11	1.66	2.77	0.193707	0.0834435	0.0213148	48	3	0	98.1		No matches found	No matches found	No matches found	No matches found	ddMS2 for preferred ion	C6 H6 N2 O_ppm:-2.97_Ifit:76MatchedIso.:4	Nicotinamide_score:98.1		67028534_:2-Oxo-1,2,3,4-tetrahydro-3-pyridinecarbonitrile_ppm:0_mzLogicScore:30; 67027933_:4-Hydrazono-2,5-cyclohexadien-1-one_ppm:0_mzLogicScore:23; 67038837_:4-Diazo-1,5-cyclohexadien-1-ol_ppm:0_mzLogicScore:17; 67153049_:1,2-Dihydropyrano[3,4-c]pyrazole_ppm:0_mzLogicScore:24; 67171342_:1,3-Dihydro[1,2]oxazolo[4,3-b]pyridine_ppm:0_mzLogicScore:44; 67495207_:2-Imino-4-methyl-2,5-dihydro-3-furanc…		Highest in E+, E+ > C > E-
123.032	C6 H5 N O2	7.298	Nicotinic acid	3000000	2000000	10000000	3.33333	10	50	0.8	4	5	-0.37	1.95	2.32	0.589847	0.0248895	0.0150724	35	10	2	98.2	71.2	No matches found	Multiple matches found	No matches found	No matches found	ddMS2 for preferred ion	C6 H5 N O2_ppm:-1.62_Ifit:92MatchedIso.:5	N4-Acetyl sulfamethazine_simScore:97.5; N-(4,6-Dimethyl-2-pyrimidinyl)-4-({[2-(trifluoromethyl)anilino]carbonyl}amino)benzenesulfonamide_simScore:98.3; Sulfamethazine_simScore:98.4; Sulfisomidine_simScore:98.7; α-Methyl-DL-histidine_score:95.3; 1-Methylhistidine_score:97.7; Picolinic acid_score:97.9; Nicotinic acid_score:98.2	Nicotinic acid_score:71.2	67037613_:2,4-Dihydro-5H-furo[3,2-b]pyrrol-5-one_ppm:0_mzLogicScore:23; 66738254_:1H-Pyrrolo[1,2-c][1,3]oxazol-1-one_ppm:0_mzLogicScore:26; 67177070_:Phenyldioxaziridine_ppm:0_mzLogicScore:43; 67177828_:(2E)-(4-Oxodihydro-2(3H)-furanylidene)acetonitrile_ppm:0_mzLogicScore:23; 67493657_:2-Hydroxy-3-oxo-1-cyclopentene-1-carbonitrile_ppm:0_mzLogicScore:19; 29318930_:2H-Pyrano[2,3-d][1,2]oxazole_ppm:…		Highest in E+, present in C and E- as well (vitamin B3)
282.256	C18 H34 O2	2.057	Oleic acid	30000000	20000000	5000000	66.6667	25	120	0.6	0.1	0.2	-0.65	-2.88	-2.23	0.96029	0.233626	0.297878	122	1	0	99		No matches found	No matches found	No matches found	No matches found	ddMS2 for preferred ion	C18 H34 O2_ppm:-1.05_Ifit:82MatchedIso.:3	Oleic acid_score:99		4517163_:Z-10-Methyl-11-tetradecen-1-ol propionate_ppm:0_mzLogicScore:25; 2339149_:4,4'-(3,4-Hexanediyl)dicyclohexanol_ppm:0_mzLogicScore:19; 4517239_:(10Z)-13,13-Dimethyl-10-tetradecen-1-yl acetate_ppm:0_mzLogicScore:26; 4516806_:Methyl (11E)-15-methyl-11-hexadecenoate_ppm:0_mzLogicScore:28; 4509702_:E-4-hexadecenyl acetate_ppm:0_mzLogicScore:26; 4509700_:E-3-hexadecenyl acetate_ppm:0_mzLogicSco…		Highest in C, but reps don’t argee well
254.224	C16 H30 O2	2.09	Palmitoleic acid	30000000	20000000	10000000	23.3333	10	40	0.6	0.3	0.6	-0.75	-1.55	-0.81	0.332551	0.0659031	0.252284	117	5	0	99.3		No matches found	No matches found	No matches found	No matches found	ddMS2 for preferred ion	C16 H30 O2_ppm:-0.62_Ifit:42MatchedIso.:2	Δ2-cis-Hexadecenoic acid_score:99.3; cis-7-Hexadecenoic acid_score:99.3; Palmitoleic acid_score:99.3; Δ2-trans-Hexadecenoic acid_score:99.3; Palmitelaidic acid_score:99.3		231079_:Dodecyl 2-butenoate_ppm:0_mzLogicScore:34; 492222_:6-Ethyl-3-octanyl cyclopentanecarboxylate_ppm:0_mzLogicScore:27; 492392_:Octyl 2,2,3,3-tetramethylcyclopropanecarboxylate_ppm:0_mzLogicScore:30; 473092_:1,2-15,16-Diepoxyhexadecane_ppm:0_mzLogicScore:34; 493717_:Undecyl 3-methyl-2-butenoate_ppm:0_mzLogicScore:34; 493914_:Undecyl cyclobutanecarboxylate_ppm:0_mzLogicScore:34; 478430_:15,15-…		Highest in C
165.079	C9 H11 N O2	9.58	Phenylalanine	20000000	9000000	9000000	10	8.88889	55.5556	0.5	0.6	1	-0.93	-0.86	0.08	0.348712	0.313512	0.992412	221	1	0	52.4		No matches found	No matches found	No matches found	Multiple matches found	ddMS2 for preferred ion	C9 H11 N O2_ppm:-2.08_Ifit:60MatchedIso.:5	L-Phenylalanine_score:52.4		8117851_:MFCD18434494_ppm:0_mzLogicScore:17; 514364_:1-(2-Amino-5-methoxyphenyl)ethanone_ppm:0_mzLogicScore:20; 291417_:2-Hydroxy-N-(4-methylphenyl)acetamide_ppm:0_mzLogicScore:29; 4540519_:(1E)-1-(4-Methoxyphenyl)ethanone oxime_ppm:0_mzLogicScore:17; 23717650_:2-Propylisonicotinic acid_ppm:0_mzLogicScore:23; 234648_:2-(1,3-Dioxolan-2-yl)aniline_ppm:0_mzLogicScore:20; 490811_:MFCD03427128_ppm:0_m…	Phenylalanine,ΔRT:-0.71; Phenylalanine,ΔRT:-0.92	~same in all; reps don't agree well
129.079	C6 H11 N O2	10.843	Pipecolic acid	300000	300000	400000	26.6667	16.6667	10	0.9	1	1	-0.16	0.36	0.52	0.895736	0.507679	0.337602	134	8	0	79.5		No matches found	No matches found	No matches found	No matches found	ddMS2 for preferred ion	C6 H11 N O2_ppm:-2.42_Ifit:96MatchedIso.:2	Nipecotic acid_score:72.1; D-(+)-Pipecolinic acid_score:79.1; L(-)-Pipecolinic acid_score:79.3; Pipecolic acid_score:79.5		10524756_:(4,4-Dimethyl-4,5-dihydro-1,3-oxazol-2-yl)methanol_ppm:0_mzLogicScore:21; 468708_:3,5-Dihydroxy-3-methylpentanenitrile_ppm:0_mzLogicScore:29; 10617929_:aminoethyl methacrylate_ppm:0_mzLogicScore:23; 465755_:2-Methyl-5-nitro-2-pentene_ppm:0_mzLogicScore:18; 13684518_:Ethyl (2Z)-2-amino-2-butenoate_ppm:0_mzLogicScore:18; 486063_:3-(1-Hydroxyethyl)-2-pyrrolidinone_ppm:0_mzLogicScore:31; 18…		Slightly up in E+. Present in all
115.063	C5 H9 N O2	11.052	Proline	500000000	500000000	400000000	6	6	10	1	0.8	0.8	-0.04	-0.37	-0.34	0.931934	0.0645126	0.0827223	105	20	10	99.9	79.6	No matches found	Multiple matches found	No matches found	Single match found	ddMS2 for preferred ion	C5 H9 N O2_ppm:-3.26_Ifit:55MatchedIso.:5	Proline_score:98.4; D-(+)-Proline_score:99.9	L-Proline_score:79.6	65793756_:2-Nitroso-3-pentanone_ppm:0_mzLogicScore:NA; 19574196_:2,4-Dimethyl-1,3-oxazolidin-5-one_ppm:0_mzLogicScore:NA; 14027984_:(2E)-1-(Aminooxy)-2-methyl-2-buten-1-one_ppm:0_mzLogicScore:NA; 66424583_:Methyl N-methylene-beta-alaninate_ppm:0_mzLogicScore:NA; 18966238_:2-Methyl-3-nitro-2-butene_ppm:0_mzLogicScore:NA; 61264797_:N-Vinyl-beta-alanine_ppm:0_mzLogicScore:NA; 66737482_:Ethyl (1E)-et…	Proline,ΔRT:-0.95	~same in all Rxes
228.147	C11 H20 N2 O3	9.35	Prolylleucine	70000	200000	900000	100	45	11.1111	3	10	4	1.54	3.7	2.15	0.331134	0.0700722	0.274724	21	1	0	97.1		No matches found	No matches found	No matches found	No matches found	ddMS2 for preferred ion	C11 H20 N2 O3_ppm:-2.61_Ifit:83MatchedIso.:4	Prolylleucine_score:97.1		67039067_:Methyl 7-(2-oxo-4-imidazolidinyl)heptanoate_ppm:0.001_mzLogicScore:NA; 66738681_:N~2~-(Cyclobutylcarbonyl)-L-lysine_ppm:0.001_mzLogicScore:NA; 21377255_:morpholinyl-4-piperidinylacetic acid_ppm:0.001_mzLogicScore:NA; 67159825_:Methyl L-prolyl-L-valinate_ppm:0.001_mzLogicScore:NA; 67159794_:(2S)-2-Amino-4-methylpentanoyl L-prolinate_ppm:0.001_mzLogicScore:NA; 515820_:3-(2-Isobutoxyethyl)…		Highest in E+
129.042	C5 H7 N O3	12.983	Pyroglutamic acid	90000000	80000000	40000000	33.3333	6.25	50	0.9	0.5	0.5	-0.08	-1.13	-1.05	0.995967	0.21242	0.228883	51	2	1	93.5	69.8	No matches found	Single match found	No matches found	No matches found	ddMS2 for preferred ion	C5 H7 N O3_ppm:-2.83_Ifit:53MatchedIso.:5	D-(+)-Pyroglutamic Acid_score:93; L-Pyroglutamic acid_score:93.5	L-Pyroglutamic acid_score:69.8	19343992_:3-Cyano-4-hydroxybutanoic acid_ppm:0_mzLogicScore:26; 15997844_:2,3-Dihydro-1,2-oxazol-5-ylacetic acid_ppm:0_mzLogicScore:27; 66000970_:3-Hydroxy-5-methylene-1,3-oxazinan-2-one_ppm:0_mzLogicScore:15; 67497021_:(2E)-2-Butenoyl carbamate_ppm:0_mzLogicScore:20; 67155286_:(2Z)-2-(Hydroxyimino)-3-oxopentanal_ppm:0_mzLogicScore:28; 67029578_:2-Nitro-3,4-dihydro-2H-pyran_ppm:0_mzLogicScore:25;…		~same in all Rxes
88.016	C3 H4 O3	7.429	Pyruvate	500000000	300000000	2000000	20	3.33333	50	0.6	0.004	0.007	-0.71	-7.97	-7.26	0.570089	0.0020003	0.00258673	15	0	0			No matches found	No matches found	No matches found	Single match found	ddMS2 for preferred ion	C3 H4 O3_ppm:-0.58_Ifit:88MatchedIso.:3			14752964_:3H-1,2$l^{4}-dioxole 2-oxide_ppm:0_mzLogicScore:NA; 67166250_:2,4-Dioxabicyclo[1.1.0]but-1-ylmethanol_ppm:0_mzLogicScore:NA; 395690_:3-Hydroxypropenoate_ppm:0_mzLogicScore:NA; 2298663_:Glucic acid_ppm:0_mzLogicScore:NA; 65792168_:1-(3-Dioxiranyl)ethanone_ppm:0_mzLogicScore:NA; 8466213_:1,3-Dioxolan-4-one_ppm:0_mzLogicScore:NA; 34727_:Hydroxy acrylic acid_ppm:0_mzLogicScore:NA; 91619_:Gl…	Pyruvate,ΔRT:-1.17	Highest in C, lower in E-, lowest in E+ (but not gone!)
150.053	C5 H10 O5	8.973	ribose	1000000	500000	700000	30	2	28.5714	0.3	0.5	2	-1.53	-0.94	0.59	0.0281651	0.0930918	0.27559	83	1	0			No matches found	No matches found	No matches found	Single match found	ddMS2 for preferred ion	C5 H10 O5_ppm:-1.14_Ifit:79MatchedIso.:2	3-{[4-(6-Chloro-1,3-benzothiazol-2-yl)-1,4-diazepan-1-yl]carbonyl}-2-pyrazinecarboxylic acid_simScore:64.7		67033613_:D-threo-Pent-3-ulose_ppm:0_mzLogicScore:16; 67152969_:5-Deoxy-D-ribonic acid_ppm:0_mzLogicScore:16; 67036770_:2,2,4,4-Tetrahydroxy-3-pentanone_ppm:0_mzLogicScore:16; 17216229_:D-Xylulofuranose_ppm:0_mzLogicScore:15; 65793897_:Methyl (2S,3R)-2,3,4-trihydroxybutanoate_ppm:0_mzLogicScore:16; 30776610_:L-Arabinofuranose_ppm:0_mzLogicScore:15; 66738821_:(3xi)-L-erythro-Pentopyranose_ppm:0_mz…	ribose,ΔRT:-0.13	Highest in C
105.042	C3 H7 N O3	13.39	Serine	700000	300000	300000	71.4286	6.66667	66.6667	0.5	0.4	0.9	-1.11	-1.26	-0.15	0.518145	0.365332	0.921063	23	15	1	74	73.9	No matches found	Single match found	No matches found	Single match found	ddMS2 for preferred ion	C3 H7 N O3_ppm:-2.81_Ifit:67MatchedIso.:2	4-{7-Acetoxy-5-chloro-3-[(1E,3E)-3,5-dimethyl-1,3-heptadien-1-yl]-7-methyl-6,8-dioxo-7,8-dihydro-2(6H)-isoquinolinyl}butanoic acid_simScore:61.7; (6,6-Dimethylbicyclo[3.1.1]hept-2-yl)methyl 6-O-[(2R,3R,4R)-3,4-dihydroxy-4-(hydroxymethyl)tetrahydro-2-furanyl]-β-D-glucopyranoside_simScore:63.6; 2-Hydroxypropyl methacrylate_simScore:64.1; 3,4-Dimethoxyphenyl 6-O-pentopyranosylhexopyranoside_simScore…	L-Serine_score:73.9	67492032_:(2E)-2-(Hydroxyimino)-1,1-propanediol_ppm:0_mzLogicScore:24; 61031713_:(3E)-3-(Hydroxyimino)-1,2-propanediol_ppm:0_mzLogicScore:24; 13341496_:2,2-Dihydroxypropanamide_ppm:0_mzLogicScore:24; 10691879_:2-Hydroxyalanine_ppm:0_mzLogicScore:41; 24769989_:N-Hydroxy-L-alanine_ppm:0_mzLogicScore:41; 4903729_:1-(Aminooxy)-2-hydroxy-1-propanone_ppm:0_mzLogicScore:33; 8305435_:N-Hydroxy-beta-alani…	Serine,ΔRT:-0.85	~same in all; one C rep up
182.079	C6 H14 O6	11.715	Sorbitol	2000000	1000000	3000000	15	30	33.3333	0.8	1	2	-0.34	0.57	0.91	0.695161	0.484223	0.223283	13	3	3	97.4	88.8	No matches found	Multiple matches found	No matches found	No matches found	ddMS2 for preferred ion	C6 H14 O6_ppm:-2.27_Ifit:74MatchedIso.:3	Dulcitol_score:85.6; D-(-)-Mannitol_score:96; L-Iditol_score:97.4	Galactitol_score:88.1; D-Mannitol_score:88.5; D-Sorbitol_score:88.8	65998676_:(3R,4R)-2-(Hydroxymethyl)-1,2,3,4,5-pentanepentol (non-preferred name)_ppm:0_mzLogicScore:73; 14080973_:Hexanhexol_ppm:0_mzLogicScore:65; 1266058_:L-Talitol_ppm:0_mzLogicScore:89; 81747_:D-Iditol_ppm:0_mzLogicScore:89; 133318_:Talitol_ppm:0_mzLogicScore:89; 107748_:D-Sorbitol_ppm:0_mzLogicScore:89; 4573729_:L-Iditol_ppm:0_mzLogicScore:89; 120230_:L-Mannitol_ppm:0_mzLogicScore:89; 74156_…		~same in all Rxes
118.027	C4 H6 O4	9.569	Succinic acid	4000000	4000000	2000000	25	25	15	1	0.4	0.4	-0.03	-1.26	-1.23	0.998049	0.169358	0.178021	21	1	2	63	64.1	No matches found	Multiple matches found	No matches found	Single match found	ddMS2 for preferred ion	C4 H6 O4_ppm:-0.34_Ifit:74MatchedIso.:3	Methylmalonic acid_score:63	Methylmalonic acid_score:63; Succinic acid_score:64.1	67161779_:2,2'-Dioxydiacetaldehyde_ppm:0_mzLogicScore:NA; 10017681_:3,3'-Dimethyl-3,3'-bidioxirane_ppm:0_mzLogicScore:NA; 67031203_:1,2,4,7-Tetraoxaspiro[2.5]octane_ppm:0_mzLogicScore:NA; 67031159_:1-Hydroxy-2-oxoethyl acetate_ppm:0_mzLogicScore:NA; 16146439_:3,4-Dihydroxy-2-oxobutanal_ppm:0_mzLogicScore:NA; 10137246_:4-Hydroxy-2-oxobutanoic acid_ppm:0_mzLogicScore:NA; 14491053_:2-Hydroxy-3-oxobu…	Succinate,ΔRT:-1.03	Highest in C, lowest in E+
342.115	C12 H22 O11	13.13	Sucrose	500000	2000000	30000000	60	30	100	5	70	10	2.42	6.08	3.66	0.235251	0.0362918	0.153289	119	4	8	97.5	94	No matches found	Multiple matches found	No matches found	Single match found	ddMS2 for preferred ion	C17 H20 N4 P2_ppm:-2.8_Ifit:34MatchedIso.:2; C10 H25 N4 O3 P3_ppm:4.13_Ifit:36MatchedIso.:2; C16 H22 O6 S_ppm:4.83_Ifit:37MatchedIso.:4; C16 H24 O4 P2_ppm:1.11_Ifit:53MatchedIso.:4; C12 H22 O11_ppm:-2.48_Ifit:82MatchedIso.:4	Sucrose_score:67.3; α-Lactose_score:89.5; D-(+)-Maltose_score:98.6; α,α-Trehalose_score:98.8	Beta-Lactose_score:77.8; Maltose_score:80.3; Melibiose_score:81.3; Gentiobiose_score:86.2; D-Turanose_score:87.3; Trehalose_score:92.2; Galactinol_score:93.3; Sucrose_score:95.5	67034837_:(1R,4S,5S,6R,7R)-6-(Benzyloxy)-5,7-dimethyl-2,8-dioxabicyclo[3.2.1]oct-4-yl methanesulfonate (non-preferred name)_ppm:-0.002_mzLogicScore:30; 30791300_:6-O-alpha-D-Galactopyranosyl-D-mannopyranose_ppm:0.001_mzLogicScore:59; 17215917_:Melibiose_ppm:0.001_mzLogicScore:59; 65792814_:3-O-beta-D-Glucopyranosyl-alpha-D-allopyranose_ppm:0.001_mzLogicScore:55; 65793888_:4-O-[(3xi)-alpha-D-xylo-…	sucrose,ΔRT:-0.81	Highest in E+, but in all; second peak not integrated, highest in C
125.014	C2 H7 N O3 S	12.303	Taurine	20000000	20000000	30000000	15	5	10	1	1	1	0.12	0.48	0.36	0.767403	0.141295	0.261801	8	1	0	92.2		No matches found	No matches found	No matches found	No matches found	ddMS2 for preferred ion	C2 H7 N O3 S_ppm:-2.35_Ifit:85MatchedIso.:6	Taurine_score:92.2		472590_:N-Methoxymethanesulfonamide_ppm:0_mzLogicScore:22; 147374_:Methyl methylsulfamate_ppm:0_mzLogicScore:22; 70733_:N-Hydroxyethanesulfonamide_ppm:0_mzLogicScore:29; 305536_:Aminoethanesulfonic acid_ppm:0_mzLogicScore:37; 11478680_:Ammonium isethionate_ppm:0_mzLogicScore:29; 89971_:(Methylamino)methanesulfonic acid_ppm:0_mzLogicScore:29; 65791939_:2-[Dihydroxy(oxido)-lambda~6~-sulfanylidene]e…		Highest in E+, but not super consistent
119.058	C4 H9 N O3	12.171	Threonine	2000000	2000000	2000000	50	35	50	0.9	1	1	-0.22	-0.03	0.18	0.986124	0.990127	0.99965	62	4	0	98.4		No matches found	No matches found	No matches found	Multiple matches found	ddMS2 for preferred ion	C4 H9 N O3_ppm:-2.3_Ifit:54MatchedIso.:4	Threonine_score:89.9; L-Homoserine_score:91.4; DL-Homoserine_score:95.7; L-Threonine_score:98.4		67035170_:1,3,6,2-Trioxazocane_ppm:0_mzLogicScore:18; 14694879_:[bis(hydroxymethylene)-methyl-$l^{7}-azanylidene]methanol_ppm:0_mzLogicScore:10; 67176120_:Ethyl aminoethaneperoxoate_ppm:0_mzLogicScore:41; 67159144_:3-Hydroxy-2-(hydroxymethyl)propanimidic acid_ppm:0_mzLogicScore:36; 391372_:2,3-Dihydroxybutanamide_ppm:0_mzLogicScore:46; 13315998_:2-Hydroxyethyl glycinate_ppm:0_mzLogicScore:41; 134…	Threonine,ΔRT:-0.86; Threonine,ΔRT:-0.12	~same in all; reps don't agree well
187.063	C11 H9 N O2	10.485	trans-3-Indoleacrylic acid	5000000	3000000	1000000	12	1.33333	50	0.5	0.2	0.4	-0.93	-2.18	-1.25	0.170228	0.018779	0.0769587	109	2	0	92.7		No matches found	No matches found	No matches found	No matches found	ddMS2 for preferred ion	C11 H9 N O2_ppm:-2.15_Ifit:42MatchedIso.:3	Indole-3-acrylic acid_score:82.1; trans-3-Indoleacrylic acid_score:92.7		67028204_:(2Z)-1(2H)-Isoquinolinylideneacetic acid_ppm:0_mzLogicScore:67; 67027977_:3,3a-Dihydrofuro[2,3-b]quinolin-4(2H)-one_ppm:0_mzLogicScore:61; 67030351_:(4E)-4-(Hydroxyimino)-3-methyl-1(4H)-naphthalenone_ppm:0_mzLogicScore:59; 15088372_:[1,3]Oxazolo[3,4-a]quinolin-3(5H)-one_ppm:0_mzLogicScore:74; 35253379_:4-[(2-furylmethylene)amino]phenol_ppm:0_mzLogicScore:60; 14371454_:2-(2-Propyn-1-yl)-…		Highest in C, lowest in E+
131.058	C5 H9 N O3	12.557	trans-4-Hydroxy-L-proline	200000	400000	1000000	20	0.75	2	2	5	3	0.82	2.38	1.56	0.0330294	0.00163537	0.00564408	74	7	0	77		No matches found	No matches found	No matches found	Single match found	ddMS2 for preferred ion	C5 H9 N O3_ppm:-2.31_Ifit:73MatchedIso.:3	5-Aminolevulinic acid_score:54.3; 3-Hydroxy-L-proline_score:74.7; cis-4-Hydroxy-D-proline_score:75.8; trans-4-Hydroxy-L-proline_score:77		11526456_:4-amino-4-oxo-pentanoate_ppm:0_mzLogicScore:36; 67039241_:2-Methyl-3-buten-2-yl nitrate_ppm:0_mzLogicScore:10; 67038736_:(2E)-2-(Hydroxyimino)propyl acetate_ppm:0_mzLogicScore:16; 16188812_:4,4-Dimethoxy-4,5-dihydro-1,3-oxazole_ppm:0_mzLogicScore:9; 66738560_:4-Hydroxy-3-(hydroxymethyl)-2-butenamide_ppm:0_mzLogicScore:16; 66001276_:5-Hydroxy-4,5-dimethyl-1,2-oxazolidin-3-one_ppm:0_mzLog…	hydroxyproline,ΔRT:-0.89	highest in E+, definitely present in E- and C
204.09	C11 H12 N2 O2	10.49	Tryptophan	500000	200000	100000	8	4	40	0.4	0.2	0.5	-1.18	-2.31	-1.13	0.0914501	0.0143368	0.0879269	110	2	0	97.1		No matches found	No matches found	No matches found	Single match found	ddMS2 for preferred ion	C11 H12 N2 O2_ppm:-1.27_Ifit:53MatchedIso.:3	D-(+)-Tryptophan_score:96.8; DL-Tryptophan_score:97.1		10222331_:Spiro[benzimidazole-2,1'-cyclopentane] 1,3-dioxide_ppm:0_mzLogicScore:28; 479451_:(2Z)-3-Methyl-2-(methylimino)-5-phenyl-1,3-oxazolidin-4-one_ppm:0_mzLogicScore:47; 21379109_:3,4,5,6-Tetrahydro-1H-1,4-benzodiazonine-2,7-dione_ppm:0_mzLogicScore:71; 62911761_:Ethyl 1H-indol-2-ylcarbamate_ppm:0_mzLogicScore:59; 14825927_:6,7-Dimethoxy-4-isoquinolinamine_ppm:0_mzLogicScore:35; 9031886_:2-O…	Tryptophan,ΔRT:-0.92	Highest in C, lowest in E+, E-
168.028	C5 H4 N4 O3	11.478	Uric acid	1000000	400000	200000	30	50	1	0.3	0.1	0.5	-1.7	-2.79	-1.09	0.0581477	0.0171049	0.203995	12	2	2	74.6	73.3	No matches found	Multiple matches found	No matches found	No matches found	ddMS2 for preferred ion	C5 H12 O2 S2_ppm:0.93_Ifit:36MatchedIso.:3; C5 H4 N4 O3_ppm:-1.87_Ifit:80MatchedIso.:4	Uric acid_score:74.6	Uric acid_score:73.3	67028463_:5-Diazo-1-methyl-2,4,6(1H,3H,5H)-pyrimidinetrione_ppm:0_mzLogicScore:30; 4474525_:4,9-Dihydro-1H-purine-2,6,8(3H)-trione_ppm:0_mzLogicScore:48; 4523995_:6,7-Dihydro-3H-[1,2,5]oxadiazolo[3,4-e][1,4]diazepine-5,8-dione_ppm:0_mzLogicScore:26; 21865627_:5,7-Dihydro-1H-purine-2,6,8(3H)-trione_ppm:0_mzLogicScore:48; 2331052_:[(4,6-Dioxo-1,4,5,6-tetrahydro-1,3,5-triazin-2-yl)oxy]acetonitrile_p…		Highest in C, in al 3
244.069	C9 H12 N2 O6	10.64	Uridine	60000	200000	900000	1	2.5	22.2222	3	10	5	1.47	3.88	2.41	0.00935113	0.000592027	0.00226088	29	2	1	88.9	51.6	No matches found	Single match found	No matches found	No matches found	ddMS2 for preferred ion	C11 H17 O2 P S_ppm:1.15_Ifit:39MatchedIso.:2; C11 H19 P3_ppm:-4.06_Ifit:78MatchedIso.:2; C9 H12 N2 O6_ppm:-2.33_Ifit:76MatchedIso.:4	Cytarabine_score:88.7; Pseudouridine_score:88.9	Uridine_score:51.6	67032949_:2,2'-{[(2Z)-2-Methyl-1,4-dioxo-2-butene-1,4-diyl]diimino}diacetic acid (non-preferred name)_ppm:0.001_mzLogicScore:31; 67030473_:3-(beta-D-Arabinofuranosyl)-2,4(1H,3H)-pyrimidinedione_ppm:0.001_mzLogicScore:61; 67152888_:3-(alpha-D-Xylofuranosyl)-2,4(1H,3H)-pyrimidinedione_ppm:0.001_mzLogicScore:61; 65793235_:Dimethyl 5-cyano-2-methoxy-1,2-oxazolidine-3,3-dicarboxylate_ppm:0.001_mzLogic…		highest in E+, but present in E- and C as well. IDed as uridine
244.069	C9 H12 N2 O6	8.872	Uridine (Urd)	600000	500000	2000000	11.6667	20	10	0.8	3	4	-0.33	1.6	1.93	0.481677	0.0199048	0.011311	29	0	0			No matches found	No matches found	No matches found	Single match found	ddMS2 for preferred ion	C11 H17 O2 P S_ppm:2.3_Ifit:38MatchedIso.:2; C11 H19 P3_ppm:-2.92_Ifit:75MatchedIso.:2; C9 H12 N2 O6_ppm:-1.18_Ifit:85MatchedIso.:4			67032949_:2,2'-{[(2Z)-2-Methyl-1,4-dioxo-2-butene-1,4-diyl]diimino}diacetic acid (non-preferred name)_ppm:0_mzLogicScore:23; 67030473_:3-(beta-D-Arabinofuranosyl)-2,4(1H,3H)-pyrimidinedione_ppm:0_mzLogicScore:51; 67152888_:3-(alpha-D-Xylofuranosyl)-2,4(1H,3H)-pyrimidinedione_ppm:0_mzLogicScore:51; 65793235_:Dimethyl 5-cyano-2-methoxy-1,2-oxazolidine-3,3-dicarboxylate_ppm:0_mzLogicScore:23; 200801…	Uridine (Urd),ΔRT:-1.07	Highest in E+, but in all samples
138.043	C6 H6 N2 O2	10.292	Urocanic acid	2000000	2000000	1000000	10	10	4	1	0.8	0.7	0.26	-0.35	-0.61	0.32613	0.202301	0.0551036	84	13	3	86.4	76.2	No matches found	Multiple matches found	No matches found	No matches found	ddMS2 for preferred ion	C6 H6 N2 O2_ppm:-2.29_Ifit:90MatchedIso.:3	Nicotinamide 1-oxide_score:75; 5-Aminonicotinic acid_score:76.3; 6-Aminonicotinic acid_score:78.2; 2-Aminonicotinic acid_score:83.9; 4-Aminonicotinic acid_score:85.5; Urocanic acid_score:86.4	Urocanic acid_score:76.2	67027757_:5-(Diazomethyl)-4-methyl-3(2H)-furanone_ppm:0_mzLogicScore:20; 67027691_:3-(3-Oxo-3H-pyrazol-5-yl)propanal_ppm:0_mzLogicScore:22; 67027985_:1-Oxa-7,8-diazaspiro[4.4]nona-2,6-dien-4-one_ppm:0_mzLogicScore:17; 67030048_:4-(2-Oxopropyl)-3H-pyrazol-3-one_ppm:0_mzLogicScore:20; 67028962_:1-(6-Oxa-2,3-diazabicyclo[3.1.0]hexa-1,4-dien-4-yl)-1-propanone_ppm:0_mzLogicScore:18; 13273364_:1H-1,2-D…		~same in all Rxes; really high peak for E+ for one peak
117.079	C5 H11 N O2	10.766	Valine	10000000	10000000	20000000	8	6	50	1	2	2	-0.06	1.01	1.07	0.989368	0.263538	0.23295	99	9	0	99.2		No matches found	No matches found	No matches found	Single match found	ddMS2 for preferred ion	C5 H11 N O2_ppm:-2.93_Ifit:54MatchedIso.:5	2-(Methylamino)isobutyric acid_score:98.2; Valine_score:99.1; L-Valine_score:99.2		67036086_:3-Methyl-3-nitroso-2-butanol_ppm:0_mzLogicScore:NA; 67024886_:5-Ethoxy-1,3-oxazolidine_ppm:0_mzLogicScore:NA; 14455654_:2,6-Piperidinediol_ppm:0_mzLogicScore:NA; 67031483_:1-Piperidinol 1-oxide_ppm:0_mzLogicScore:NA; 10814156_:2-(1,3-Dioxolan-4-yl)ethanamine_ppm:0_mzLogicScore:NA; 476893_:2-Methoxy-N-methylpropanamide_ppm:0_mzLogicScore:NA; 9139677_:(2S,3S,4R)-2-Methyl-3,4-pyrrolidinedi…	Valine,ΔRT:-0.96	~same in all Rxes; up in one E+ rep
152.033	C5 H4 N4 O2	9.343	Xanthine	400000	500000	900000	50	40	44.4444	1	2	2	0.38	1.11	0.73	0.774204	0.32247	0.604456	11	1	0	68.1		No matches found	No matches found	No matches found	No matches found	ddMS2 for preferred ion	C5 H4 N4 O2_ppm:-0.96_Ifit:96MatchedIso.:3	Xanthine_score:68.1		9301575_:2-Methyl-4-nitro-1H-imidazole-5-carbonitrile_ppm:0_mzLogicScore:NA; 7705230_:3-Nitro-1-(2-propyn-1-yl)-1H-1,2,4-triazole_ppm:0_mzLogicScore:NA; 514905_:1H-Pyrazolo[3,4-d]pyrimidine-3,4(2H,5H)-dione_ppm:0_mzLogicScore:NA; 10565250_:hypoxanthine 3-oxide_ppm:0_mzLogicScore:NA; 75116_:1H-purine-2,8(3H,7H)-dione_ppm:0_mzLogicScore:NA; 10571693_:pyrazolo[1,5-a][1,3,5]triazine-2,4-diol_ppm:0_mz…		~same in all; up in one E+ rep
205.037	C10 H7 N O4	10.265	Xanthurenic acid	400000	200000	1000000	17.5	45	100	0.4	3	9	-1.48	1.62	3.1	0.285602	0.350009	0.0752876	32	17	0	90.6		No matches found	No matches found	No matches found	No matches found	ddMS2 for preferred ion	C10 H7 N O4_ppm:-2.33_Ifit:58MatchedIso.:3	2-[3-({5-[2-Methyl-6-(trifluoromethyl)pyridin-3-yl]-1,3,4-oxadiazol-2-yl}thio)propyl]-1H-isoindole-1,3(2H)-dione_simScore:76.3; N-Acetyl-DL-tryptophan_simScore:79.6; 6-Methyl-5,7,8,15-tetrahydrobis[1,3]benzodioxolo[5,6-c:5',6'-g]azecin-14(6H)-one_simScore:80.3; 3-{4-[(4-Fluorophenyl)sulfonyl]piperazino}-4H-chromen-4-one_simScore:80.8; (1S,19R)-8,10-Dioxa-4,17-diazaheptacyclo[15.4.3.01,18 04,19 05…		67154580_:7-Hydroxy-4-methyl-8-nitroso-2H-chromen-2-one_ppm:0_mzLogicScore:39; 67153212_:5,8-Dihydroxy-2-imino-2,3-dihydro-1,4-naphthalenedione_ppm:0_mzLogicScore:45; 67024695_:4,6-Dihydroxy-2-methyl-5,8-quinolinedione_ppm:0_mzLogicScore:33; 67172433_:3-Hydroperoxy-8-nitroso-1-naphthol_ppm:0_mzLogicScore:31; 67497756_:5-Methyl-7-nitro-1-benzofuran-2-carbaldehyde_ppm:0_mzLogicScore:36; 67497230_:6…		Present in all 3, E+ is highest
159.126	C8 H17 N O2	8.729	α-Aminocaprylic acid	100000	40000	10000	30	7.5	50	0.3	0.09	0.3	-1.67	-3.51	-1.84	0.0488072	0.00583376	0.0339606	62	1	0	91.2		No matches found	No matches found	No matches found	No matches found	ddMS2 for preferred ion	C8 H17 N O2_ppm:-2.09_Ifit:95MatchedIso.:2	DL-α-Aminocaprylic acid_score:91.2		67028571_:2-(Aminomethyl)-1,5-anhydro-2,4-dideoxy-5,5-dimethyl-D-erythro-pentitol_ppm:0_mzLogicScore:23; 67030018_:(2,2-Dimethylpropyl)ethylcarbamic acid_ppm:0_mzLogicScore:13; 67034073_:3-(Diethylamino)-2-hydroxybutanal_ppm:0_mzLogicScore:17; 11380147_:7-Aminooctanoic acid_ppm:0_mzLogicScore:38; 67036921_:2-(Aminooxy)-4-pentyloxetane_ppm:0_mzLogicScore:31; 66424934_:4-Nitroso-1-octanol_ppm:0_mzL…		Highest in C; present in E- and E+
189.042	C10 H7 N O3	7.134	α-Cyano-3-hydroxycinnamic acid	2000000	2000000	2000000	35	35	15	0.7	0.7	1	-0.51	-0.55	-0.04	0.561916	0.589208	0.998232	78	2	0	89.1		No matches found	No matches found	No matches found	No matches found	ddMS2 for preferred ion	C10 H7 N O3_ppm:-1.49_Ifit:80MatchedIso.:3	Kynurenic acid_score:83.5; α-Cyano-3-hydroxycinnamic acid_score:89.1		67032194_:5-Hydroxy-2-imino-2,3-dihydro-1,4-naphthalenedione_ppm:0_mzLogicScore:40; 67030440_:4-Acryloyl-1,3-benzoxazol-2(3H)-one_ppm:0_mzLogicScore:41; 67026913_:7-Amino-2-oxo-2H-chromene-3-carbaldehyde_ppm:0_mzLogicScore:49; 67173087_:7H-Furo[2,3-f][1,3]benzoxazin-3(2H)-one_ppm:0_mzLogicScore:36; 67174636_:(3E)-3-(Aminomethylene)-2H-chromene-2,4(3H)-dione_ppm:0_mzLogicScore:36; 67495486_:3-Oxo-…		~same in all; reps don't agree well
278.224	C18 H30 O2	2.086	α-Linolenic acid	4000000	2000000	2000000	25	4.5	20	0.4	0.5	1	-1.44	-0.91	0.54	0.034115	0.109582	0.311539	82	5	0	99.7		No matches found	No matches found	No matches found	No matches found	ddMS2 for preferred ion	C12 H31 N4 O P_ppm:2.51_Ifit:58MatchedIso.:2; C18 H30 O2_ppm:-1.2_Ifit:96MatchedIso.:2	Oleic acid alkyne_score:99.6; Pinolenic acid_score:99.6; γ-Linolenic acid_score:99.6; α-Eleostearic acid_score:99.7; α-Linolenic acid_score:99.7		67031873_:(4E,6E,10E)-4,6,10-Hexadecatrien-1-yl acetate_ppm:0_mzLogicScore:46; 67032085_:1,1'-Bi(cyclononyl)-2,3-dione_ppm:0_mzLogicScore:45; 67032540_:(3E)-3-Hexadecen-11-yn-1-yl acetate_ppm:0_mzLogicScore:49; 67033829_:(10E,12E,14E)-10,12,14-Hexadecatrien-1-yl acetate_ppm:0_mzLogicScore:46; 67152846_:(4E,6E,15E)-4,6,15-Octadecatrienoic acid_ppm:0_mzLogicScore:53; 67037688_:(1E)-1-Hexadecen-11-y…		~same in all
342.115	C12 H22 O11	13.918	α,α-Trehalose	20000000	10000000	3000000	45	0.5	66.6667	0.6	0.2	0.3	-0.78	-2.51	-1.73	0.604707	0.0608206	0.128802	119	16	32	98.8	95.5	No matches found	Multiple matches found	No matches found	Single match found	ddMS2 for preferred ion	C17 H20 N4 P2_ppm:-2.73_Ifit:33MatchedIso.:2; C10 H25 N4 O3 P3_ppm:4.2_Ifit:37MatchedIso.:2; C9 H14 N10 O5_ppm:1.53_Ifit:31MatchedIso.:2; C16 H22 O6 S_ppm:4.9_Ifit:36MatchedIso.:4; C16 H24 O4 P2_ppm:1.18_Ifit:51MatchedIso.:4; C12 H22 O11_ppm:-2.41_Ifit:81MatchedIso.:4	Sucrose_score:67.3; α-Lactose_score:89.5; D-(+)-Maltose_score:98.6; α,α-Trehalose_score:98.8	Beta-Lactose_score:77.8; Maltose_score:80.3; Melibiose_score:81.3; Gentiobiose_score:86.2; D-Turanose_score:87.3; Trehalose_score:92.2; Galactinol_score:93.3; Sucrose_score:95.5	67034837_:(1R,4S,5S,6R,7R)-6-(Benzyloxy)-5,7-dimethyl-2,8-dioxabicyclo[3.2.1]oct-4-yl methanesulfonate (non-preferred name)_ppm:-0.002_mzLogicScore:29; 30791300_:6-O-alpha-D-Galactopyranosyl-D-mannopyranose_ppm:0.001_mzLogicScore:58; 17215917_:Melibiose_ppm:0.001_mzLogicScore:58; 65792814_:3-O-beta-D-Glucopyranosyl-alpha-D-allopyranose_ppm:0.001_mzLogicScore:55; 65793888_:4-O-[(3xi)-alpha-D-xylo-…	sucrose,ΔRT:-1.6	Highest in C, lowest in E+; neighboring peak that's highest in E+
194.042	C6 H10 O7	12.687	β-D-Glucopyranuronic acid	70000	70000	400000	85.7143	10	25	1	5	6	-0.02	2.45	2.47	0.947865	0.0819365	0.103033	46	1	0	62		No matches found	No matches found	No matches found	No matches found	ddMS2 for preferred ion	C10 H12 P2_ppm:4.07_Ifit:61MatchedIso.:2; C6 H10 O7_ppm:-2.26_Ifit:76MatchedIso.:3	β-D-Glucopyranuronic acid_score:62		66000378_:(2E)-L-threo-Hex-2-enonic acid_ppm:0_mzLogicScore:41; 67159802_:(1R,2R,3R,4R,5S,6S)-7-Oxabicyclo[4.1.0]heptane-1,2,3,4,5,6-hexol_ppm:0_mzLogicScore:44; 388398_:D-arabino-Hex-5-ulofuranosonic acid_ppm:0_mzLogicScore:50; 29353972_:alpha-D-Gulopyranuronic acid_ppm:0_mzLogicScore:53; 29353971_:beta-D-Gulopyranuronic acid_ppm:0_mzLogicScore:53; 61405836_:beta-D-Allopyranuronic acid_ppm:0_mzL…		Highest in E+, present in all 3
61.0525	C2 H7 N O	10.426		2000000	6000000	20000	100	133.333	2.5	3	0.01	0.004	1.5	-6.48	-7.98	0.998252	0.352852	0.335309	9	33	0			No matches found	No matches found	No matches found	No matches found	ddMS2 for other ion	C2 H7 N O_ppm:-4.16_Ifit:78MatchedIso.:3	4-Acetamidobutanoic acid_simScore:68.7; 3-(3-sec-Butyl-6-isopropyl-5,8,9-trimethyl-1,4,7,10,14,17-hexaoxoicosahydropyrrolo[1,2-d][1,4,7,10,13,16]oxapentaazacyclononadecin-16-yl)-2-methylpropanoic acid_simScore:68.8; Dihydrothymine_simScore:70.3; N-(3,5-Dimethyl-4-isoxazolyl)-N'-{[5-methyl-2-(trifluoromethyl)-3-furyl]methyl}urea_simScore:70.8; 5-(4-Methylpiperazino)-4-nitrothiophene-2-sulfonamide_…		10632948_:Dimethylazane oxide_ppm:0_mzLogicScore:NA; 13514839_:Methoxymethylamine_ppm:0_mzLogicScore:NA; 4414674_:(Methylamino)methanol_ppm:0_mzLogicScore:NA; 144383_:Hydroxyethylamine_ppm:0_mzLogicScore:NA; 455852_:aminoethanol_ppm:0_mzLogicScore:NA; 26020_:N,N-DIMETHYLHYDROXYLAMINE_ppm:0_mzLogicScore:NA; 13596_:N,O-Dimethylhydroxylamine_ppm:0_mzLogicScore:NA; 62566_:(Aminooxy)ethane_ppm:0_mzLog…		High in C
61.0528	C2 H7 N O	15.726		4000000	5000000	20000000	5	2	30	1	5	4	0.36	2.38	2.02	0.460735	0.00636183	0.0103091	9	0	0			No matches found	No matches found	No matches found	No matches found	ddMS2 for preferred ion	C2 H7 N O_ppm:0.65_Ifit:71MatchedIso.:4			10632948_:Dimethylazane oxide_ppm:0_mzLogicScore:NA; 13514839_:Methoxymethylamine_ppm:0_mzLogicScore:NA; 4414674_:(Methylamino)methanol_ppm:0_mzLogicScore:NA; 144383_:Hydroxyethylamine_ppm:0_mzLogicScore:NA; 455852_:aminoethanol_ppm:0_mzLogicScore:NA; 26020_:N,N-DIMETHYLHYDROXYLAMINE_ppm:0_mzLogicScore:NA; 13596_:N,O-Dimethylhydroxylamine_ppm:0_mzLogicScore:NA; 62566_:(Aminooxy)ethane_ppm:0_mzLog…		Highest in E+, but looks present in E- and C as well
61.9741		21.838		200000	200000	200000	15	10	3	1	0.8	0.7	0.07	-0.36	-0.42	0.843882	0.126489	0.0825489	0	19	0			No matches found	No matches found	No matches found	No matches found	ddMS2 for other ion		4-[2-Nitro-4-(trifluoromethyl)phenyl]-N-phenyl-1,4-diazepane-1-carboxamide_simScore:62.1; 3-(3-sec-Butyl-6-isopropyl-5,8,9-trimethyl-1,4,7,10,14,17-hexaoxoicosahydropyrrolo[1,2-d][1,4,7,10,13,16]oxapentaazacyclononadecin-16-yl)-2-methylpropanoic acid_simScore:68.8; 5-(4-Methylpiperazino)-4-nitrothiophene-2-sulfonamide_simScore:72.6; 4-Guanidinobutyric acid_simScore:76.7; DL-3-Aminoisobutyric acid…				~same in all Rxes
61.9745		21.827		8000000	8000000	6000000	7.5	6.25	5	1	0.7	0.7	0.09	-0.47	-0.56	0.632747	0.0326683	0.0197914	0	0	0			No matches found	No matches found	No matches found	No matches found	ddMS2 for preferred ion						~same in all Rxes
63.0084		21.811		10000000	20000000	10000000	20	10	6	1	0.8	0.7	0.18	-0.4	-0.58	0.511244	0.132194	0.0546647	0	0	0			No matches found	No matches found	No matches found	No matches found	ddMS2 for preferred ion						Don't see anything?
68.0623	C5 H8	9.983		2000000	2000000	2000000	15	2.5	50	0.7	0.9	1	-0.6	-0.14	0.45	0.594741	0.872739	0.851904	25	0	0			No matches found	No matches found	No matches found	No matches found	ddMS2 for preferred ion	C5 H8_ppm:-3.62_Ifit:77MatchedIso.:3			14429277_:2-methylbut-1-en-2-yne_ppm:0_mzLogicScore:NA; 10628655_:2,2-di(methyl)propane_ppm:0_mzLogicScore:NA; 10179182_:3-Methylcyclobutene_ppm:0_mzLogicScore:NA; 123829_:1-Methyl-2-methylenecyclopropane_ppm:0_mzLogicScore:NA; 120744_:1-Methylcyclobutene_ppm:0_mzLogicScore:NA; 123224_:1,2-Dimethylcyclopropene_ppm:0_mzLogicScore:NA; 14564_:Piperylene_ppm:0_mzLogicScore:NA; 119929_:Bicyclo(1.1.1)p…		~same in all; reps don't agree well
69.0577	C4 H7 N	11.05		8000000	8000000	6000000	5	7.5	16.6667	1	0.8	0.8	-0.01	-0.3	-0.29	0.996561	0.278443	0.29893	20	0	0			No matches found	No matches found	No matches found	No matches found	ddMS2 for preferred ion	C4 H7 N_ppm:-1.68_Ifit:76MatchedIso.:2			67162372_:1-Azaspiro[2.2]pentane_ppm:0_mzLogicScore:NA; 10281239_:N-Ethylethenimine_ppm:0_mzLogicScore:NA; 11567545_:2,2-Dimethylethylenimine_ppm:0_mzLogicScore:NA; 10431642_:2-Vinylaziridine_ppm:0_mzLogicScore:NA; 13398024_:1-Buten-1-imine_ppm:0_mzLogicScore:NA; 8504704_:buta-2,3-dien-1-amine_ppm:0_mzLogicScore:NA; 4957825_:(1E)-1,3-Butadien-1-amine_ppm:0_mzLogicScore:NA; 309665_:1-Methyl-2-meth…		~same in all
71.0734	C4 H9 N	10.762		700000	700000	1000000	11.4286	5.71429	60	1	2	2	0.06	0.85	0.79	0.988163	0.322991	0.369027	21	0	0			No matches found	No matches found	No matches found	No matches found	ddMS2 for preferred ion	C4 H9 N_ppm:-2.12_Ifit:90MatchedIso.:2			10661407_:butan-1-amine_ppm:0_mzLogicScore:18; 10677453_:2-Methyl-1-propen-1-amine_ppm:0_mzLogicScore:18; 61387526_:(2S)-2-Methylazetidine_ppm:0_mzLogicScore:15; 13516126_:2-Butanimine_ppm:0_mzLogicScore:16; 120671_:(1E)-N-Ethylethanimine_ppm:0_mzLogicScore:18; 47170_:2,3-Dimethylaziridine_ppm:0_mzLogicScore:15; 474055_:1,2-Dimethylaziridine_ppm:0_mzLogicScore:15; 455177_:N,N-Dimethylethenamine_p…		~same in all; one E+ rep up
72.0209	C3 H4 O2	12.49		6000000	4000000	3000000	16.6667	12.5	10	0.7	0.5	0.8	-0.51	-0.88	-0.38	0.197957	0.0547417	0.33056	15	2	0	99.4		No matches found	No matches found	No matches found	No matches found	ddMS2 for preferred ion	C3 H4 O2_ppm:-2.67_Ifit:90MatchedIso.:2	Acrylic acid_score:99.4		67177284_:2H-Oxet-4-ol_ppm:0_mzLogicScore:NA; 21378141_:methoxyketene_ppm:0_mzLogicScore:NA; 9291120_:(2Z)-3-Hydroxyacrylaldehyde_ppm:0_mzLogicScore:NA; 9095687_:(2R)-2-Oxiranecarbaldehyde_ppm:0_mzLogicScore:NA; 15391077_:2-Hydroxyacrylaldehyde_ppm:0_mzLogicScore:NA; 9204931_:1,3-Dioxole_ppm:0_mzLogicScore:NA; 4447484_:3-Hydroxy-2-propenal_ppm:0_mzLogicScore:NA; 10637298_:dioxolene_ppm:0_mzLogicS…		~same in all, one C rep high
72.021	C3 H4 O2	11.324		70000	200000	800000	57.1429	10	62.5	3	10	3	1.7	3.46	1.76	0.199079	0.0471729	0.265082	15	1	0	89.7		No matches found	No matches found	No matches found	No matches found	ddMS2 for preferred ion	C3 H4 O2_ppm:-2.08_Ifit:100MatchedIso.:1	Acrylic acid_score:99.4		67177284_:2H-Oxet-4-ol_ppm:0_mzLogicScore:NA; 21378141_:methoxyketene_ppm:0_mzLogicScore:NA; 9291120_:(2Z)-3-Hydroxyacrylaldehyde_ppm:0_mzLogicScore:NA; 9095687_:(2R)-2-Oxiranecarbaldehyde_ppm:0_mzLogicScore:NA; 15391077_:2-Hydroxyacrylaldehyde_ppm:0_mzLogicScore:NA; 9204931_:1,3-Dioxole_ppm:0_mzLogicScore:NA; 4447484_:3-Hydroxy-2-propenal_ppm:0_mzLogicScore:NA; 10637298_:dioxolene_ppm:0_mzLogicS…		highest in E+
72.021	C3 H4 O2	9.675		20000	40000	400000	50	75	50	2	10	9	0.77	3.86	3.1	0.711978	0.0399742	0.0672728	15	0	0			No matches found	No matches found	No matches found	No matches found	ddMS2 for preferred ion	C3 H4 O2_ppm:-1.29_Ifit:83MatchedIso.:2			67177284_:2H-Oxet-4-ol_ppm:0_mzLogicScore:NA; 21378141_:methoxyketene_ppm:0_mzLogicScore:NA; 9291120_:(2Z)-3-Hydroxyacrylaldehyde_ppm:0_mzLogicScore:NA; 9095687_:(2R)-2-Oxiranecarbaldehyde_ppm:0_mzLogicScore:NA; 15391077_:2-Hydroxyacrylaldehyde_ppm:0_mzLogicScore:NA; 9204931_:1,3-Dioxole_ppm:0_mzLogicScore:NA; 4447484_:3-Hydroxy-2-propenal_ppm:0_mzLogicScore:NA; 10637298_:dioxolene_ppm:0_mzLogicS…		main peak only in E+
72.0685	C3 H8 N2	6.655		2000000	1000000	200000	50	20	45	0.8	0.1	0.2	-0.31	-2.8	-2.49	0.983399	0.0674601	0.0760197	21	0	0			No matches found	No matches found	No matches found	No matches found	ddMS2 for preferred ion	C3 H8 N2_ppm:-3.19_Ifit:78MatchedIso.:3			67037586_:1-(1-Aziridinyl)methanamine_ppm:0_mzLogicScore:NA; 65793835_:1-Methyl-2-vinylhydrazine_ppm:0_mzLogicScore:NA; 67160226_:3-Imino-1-propanamine_ppm:0_mzLogicScore:NA; 61365683_:(1E)-Propylidenehydrazine_ppm:0_mzLogicScore:NA; 466603_:1,3-Dimethyldiaziridine_ppm:0_mzLogicScore:NA; 458633_:trans-methyl-ethyl-diazene_ppm:0_mzLogicScore:NA; 7875917_:(1E)-1-Ethylidene-2-methylhydrazine_ppm:0_m…		~same in all Rxes. Very noisy.
72.0686	C3 H8 N2	4.817		1000000	2000000	800000	6	100	37.5	2	0.8	0.4	0.95	-0.31	-1.26	0.688206	0.901098	0.476708	21	0	0			No matches found	No matches found	No matches found	No matches found	ddMS2 for preferred ion	C3 H8 N2_ppm:-2.41_Ifit:66MatchedIso.:3			67037586_:1-(1-Aziridinyl)methanamine_ppm:0_mzLogicScore:NA; 65793835_:1-Methyl-2-vinylhydrazine_ppm:0_mzLogicScore:NA; 67160226_:3-Imino-1-propanamine_ppm:0_mzLogicScore:NA; 61365683_:(1E)-Propylidenehydrazine_ppm:0_mzLogicScore:NA; 466603_:1,3-Dimethyldiaziridine_ppm:0_mzLogicScore:NA; 458633_:trans-methyl-ethyl-diazene_ppm:0_mzLogicScore:NA; 7875917_:(1E)-1-Ethylidene-2-methylhydrazine_ppm:0_m…		~same, huge mess, up in one E-
74.0367	C3 H6 O2	3.419		500000	500000	300000	10	20	6.66667	1	0.7	0.6	0.25	-0.59	-0.84	0.469818	0.0902935	0.038094	23	0	0			No matches found	No matches found	No matches found	No matches found	ddMS2 for preferred ion	C3 H6 O2_ppm:-1.03_Ifit:87MatchedIso.:2			67167247_:(1E)-1-Propene-1,2-diol_ppm:0_mzLogicScore:NA; 10693992_:1,3-Propanediolate_ppm:0.001_mzLogicScore:NA; 14476653_:dimethoxymethane_ppm:0_mzLogicScore:NA; 9301293_:1-Methoxyethenol_ppm:0_mzLogicScore:NA; 9157685_:Allyl hydroperoxide_ppm:0_mzLogicScore:NA; 141532_:1,1-Cyclopropanediol_ppm:0_mzLogicScore:NA; 8488625_:(1E)-1-Propene-1,3-diol_ppm:0_mzLogicScore:NA; 388368_:L-lactaldehyde_ppm:…		~same in all Rxes
75.0319	C2 H5 N O2	13.44		700000	500000	200000	57.1429	2	50	0.7	0.2	0.3	-0.45	-2.04	-1.59	0.916278	0.147097	0.206374	17	0	0			No matches found	No matches found	No matches found	No matches found	ddMS2 for preferred ion	C2 H5 N O2_ppm:-2.36_Ifit:70MatchedIso.:4			15547741_:1-amino-1-oxo-ethanolate_ppm:0_mzLogicScore:NA; 11308297_:1-Nitrosoethanol_ppm:0_mzLogicScore:NA; 67025773_:1,3,2-Dioxazolidine_ppm:0_mzLogicScore:NA; 13709843_:(2E)-2-(Hydroxyimino)ethanol_ppm:0_mzLogicScore:NA; 14394937_:bisoxazolidine_ppm:0_mzLogicScore:NA; 67038709_:(E)-(Methoxymethylene)azane oxide_ppm:0_mzLogicScore:NA; 15050381_:N-Hydroxy-N-methylformamide_ppm:0_mzLogicScore:NA; …		Highest in C, but reps don’t argee well
77.9482		22.087		2000000	2000000	1000000	10	15	6	1	0.6	0.6	-0.04	-0.73	-0.69	0.960373	0.0607673	0.0729567	0	0	0			No matches found	No matches found	No matches found	No matches found	ddMS2 for preferred ion						~same in all Rxes
78.9822		22.138		2000000	2000000	1000000	15	10	0.9	1	0.6	0.6	0.08	-0.67	-0.75	0.865753	0.0601361	0.0433794	4	0	0			No matches found	No matches found	No matches found	No matches found	ddMS2 for preferred ion				10628184_:(Aminooxy)(oxo)phosphine_ppm:0_mzLogicScore:NA; 13866554_:Cyanomethyl potassium_ppm:0_mzLogicScore:NA; 15001277_:N-Chloroformamide_ppm:0_mzLogicScore:NA; 61363_:Carbamic chloride_ppm:0_mzLogicScore:NA		~same in all Rxes
79.042	C5 H5 N	2.611		60000000	40000000	20000000	50	125	50	0.6	0.4	0.7	-0.69	-1.26	-0.57	0.636307	0.773968	0.961952	11	0	0			No matches found	No matches found	No matches found	No matches found	ddMS2 for preferred ion	C5 H5 N_ppm:-2.86_Ifit:71MatchedIso.:4			67036188_:1,3-Pentadiyn-1-amine_ppm:0_mzLogicScore:NA; 67166151_:(2E)-2-Penten-4-yn-1-imine_ppm:0_mzLogicScore:NA; 32979753_:2,4-Pentadiyn-1-amine_ppm:0_mzLogicScore:NA; 24771845_:azafulvene_ppm:0_mzLogicScore:NA; 10607720_:2-Methylene-3-butenenitrile_ppm:0_mzLogicScore:NA; 29320501_:2,4-Cyclopentadien-1-imine_ppm:0_mzLogicScore:NA; 123603_:1-Cyanobicyclo[1.1.0]butane_ppm:0_mzLogicScore:NA; 12799…		~same in all; reps don't agree well
81.0189		21.816		1000000	1000000	700000	10	3	14.2857	1	0.8	0.7	0.13	-0.41	-0.54	0.748965	0.182427	0.0996332	0	0	0			No matches found	No matches found	No matches found	No matches found	ddMS2 for preferred ion						~same in all Rxes
81.0327	C3 H3 N3	7.663		5000000	3000000	2000000	100	30	25	0.6	0.4	0.7	-0.71	-1.25	-0.54	0.957939	0.735017	0.873552	8	0	0			No matches found	No matches found	No matches found	No matches found	ddMS2 for preferred ion	C3 H3 N3_ppm:0.2_Ifit:80MatchedIso.:2			65793198_:2,3-Diiminopropanenitrile_ppm:0_mzLogicScore:NA; 67493038_:2,4,6-Triazabicyclo[3.1.0]hexa-1,3-diene_ppm:0_mzLogicScore:NA; 67164606_:4H-Imidazol-4-imine_ppm:0_mzLogicScore:NA; 11463137_:2H-Imidazol-2-imine_ppm:0_mzLogicScore:NA; 133313_:Aminomalononitrile_ppm:0_mzLogicScore:NA; 60843_:1,2,4-Triazine_ppm:0_mzLogicScore:NA; 109669_:1,2,3-Triazine_ppm:0_mzLogicScore:NA; 8905_:XY2957000_ppm…		~same in all; big mess
81.9816		9.571		300000	400000	200000	26.6667	17.5	3	1	0.7	0.6	0.39	-0.47	-0.86	0.373022	0.304629	0.0831804	0	0	0			No matches found	No matches found	No matches found	No matches found	ddMS2 for preferred ion						~same in all Rxes
81.9821	C H3 Cl O2	9.538		1000000	1000000	800000	6	10	3.75	1	0.8	0.7	0.27	-0.26	-0.54	0.184992	0.200363	0.037146	2	0	0			No matches found	No matches found	No matches found	No matches found	ddMS2 for preferred ion	C H3 Cl O2_ppm:-0.38_Ifit:60MatchedIso.:5			97036_:PHOSPHOROUS ACID_ppm:0_mzLogicScore:NA; 10449259_:Phosphonic acid_ppm:0_mzLogicScore:NA		~same in all Rxes
82.053	C4 H6 N2	9.735		300000	800000	600000	6.66667	50	66.6667	2	2	0.8	1.23	0.87	-0.36	0.396336	0.656856	0.835932	35	0	0			No matches found	No matches found	No matches found	No matches found	ddMS2 for preferred ion	C4 H6 N2_ppm:-0.54_Ifit:86MatchedIso.:2			67029970_:2,3-Diazabicyclo[3.1.0]hex-3-ene_ppm:0_mzLogicScore:NA; 67024477_:2-Ethynyl-1-aziridinamine_ppm:0_mzLogicScore:NA; 66424753_:1,2-Cyclobutanediimine_ppm:0_mzLogicScore:NA; 67169047_:Diazocyclobutane_ppm:0_mzLogicScore:NA; 67495171_:2,3-Diazabicyclo[3.1.0]hex-1-ene_ppm:0_mzLogicScore:NA; 10609631_:4,5-Dihydropyridazine_ppm:0_mzLogicScore:NA; 10609325_:1,4-Dihydropyridazine_ppm:0_mzLogicSc…		~same in all
82.9793		9.604		100000	100000	80000	20	40	6.25	1	0.8	0.6	0.3	-0.38	-0.69	0.671976	0.536587	0.238066	0	0	0			No matches found	No matches found	No matches found	No matches found	ddMS2 for preferred ion						~same in all Rxes
83.0369	C4 H5 N O	12.975		2000000	2000000	800000	25	3	50	1	0.5	0.5	-0.01	-1.12	-1.11	0.999789	0.206361	0.202911	42	0	0			No matches found	No matches found	No matches found	No matches found	ddMS2 for preferred ion	C4 H5 N O_ppm:-2.44_Ifit:94MatchedIso.:2			15706647_:4-Methylene-2-oxetanimine_ppm:0_mzLogicScore:NA; 67024237_:4-Methyl-2(1H)-azetone_ppm:0_mzLogicScore:NA; 66738568_:N-1-Propen-1-ylideneformamide_ppm:0_mzLogicScore:NA; 13672418_:5-Methylene-4,5-dihydro-1,3-oxazole_ppm:0_mzLogicScore:NA; 67174402_:(E)-3-Butyn-1-ylideneazane oxide_ppm:0_mzLogicScore:NA; 67174660_:5-Methylene-2,5-dihydro-1,3-oxazole_ppm:0_mzLogicScore:NA; 67495220_:(1E)-1-…		~same in all Rxes
84.0209	C4 H4 O2	13.133		10000	10000	200000	100	60	100	1	20	20	-0.05	4.16	4.21	0.9936	0.164137	0.179653	29	0	0			No matches found	No matches found	No matches found	No matches found	ddMS2 for preferred ion	C4 H4 O2_ppm:-2.56_Ifit:87MatchedIso.:2			67026144_:(3E)-3-Ethylidene-2-oxiranone_ppm:0_mzLogicScore:NA; 66000956_:2-Hydroxy-2,3-butadienal_ppm:0_mzLogicScore:NA; 29318463_:2-Hydroxy-2-cyclobuten-1-one_ppm:0_mzLogicScore:NA; 14766444_:4-Hydroxy-2-cyclobuten-1-one_ppm:0_mzLogicScore:NA; 67026826_:2,6-Dioxabicyclo[3.1.0]hex-3-ene_ppm:0_mzLogicScore:NA; 57489028_:2,4-Bis(methylene)-1,3-dioxetane_ppm:0_mzLogicScore:NA; 15683752_:Methylenemal…		Really only in one E+ rep - anomaly?
84.0685	C4 H8 N2	10.424		2000000	5000000	9000	150	140	11.1111	2	0.005	0.002	1.3	-7.75	-9.05	0.967232	0.386869	0.309363	35	0	0			No matches found	No matches found	No matches found	No matches found	ddMS2 for preferred ion	C4 H8 N2_ppm:-2.43_Ifit:92MatchedIso.:2			67031251_:1,2-Divinylhydrazine_ppm:0_mzLogicScore:NA; 67170172_:1-Cyclopropyldiaziridine_ppm:0_mzLogicScore:NA; 10668251_:2,3,5,6-tetrahydropyrazine_ppm:0_mzLogicScore:NA; 29337233_:2-Methyl-2,3-dihydro-1H-pyrazole_ppm:0_mzLogicScore:NA; 371346_:(1E,2E)-N,N'-Dimethyl-1,2-ethanediimine_ppm:0_mzLogicScore:NA; 11515235_:1-$l^{1}-azanylpyrrolidine_ppm:0_mzLogicScore:NA; 67027146_:(1E)-N-(1-Aziridinyl…		~same in all, huge mess
85.0163	C3 H3 N O2	6.923		8000000	20000000	20000000	50	25	20	2	2	1	1.05	1.28	0.23	0.256479	0.174455	0.899789	23	0	0			No matches found	No matches found	No matches found	No matches found	ddMS2 for preferred ion	C3 H3 N O2_ppm:-0.4_Ifit:85MatchedIso.:4			67030338_:1-Nitrocyclopropene_ppm:0_mzLogicScore:NA; 67034122_:Ethynyl carbamate_ppm:0_mzLogicScore:NA; 65792942_:2-Propyn-1-yl nitrite_ppm:0_mzLogicScore:NA; 16311377_:oxazole 1-oxide_ppm:0_mzLogicScore:NA; 10751523_:Acetyl cyanate_ppm:0_mzLogicScore:NA; 10609055_:1,4,2-Dioxazine_ppm:0_mzLogicScore:NA; 11455991_:1,3-Oxazol-5-ol_ppm:0_mzLogicScore:NA; 28671205_:3-Nitrocyclopropene_ppm:0_mzLogicSc…		~same in all
85.0164	C3 H3 N O2	7.067		8000000	7000000	10000000	50	10	20	0.9	1	2	-0.14	0.57	0.72	0.998082	0.487701	0.462909	23	0	0			No matches found	No matches found	No matches found	No matches found	ddMS2 for preferred ion	C3 H3 N O2_ppm:-0.33_Ifit:74MatchedIso.:4			67030338_:1-Nitrocyclopropene_ppm:0_mzLogicScore:NA; 67034122_:Ethynyl carbamate_ppm:0_mzLogicScore:NA; 65792942_:2-Propyn-1-yl nitrite_ppm:0_mzLogicScore:NA; 16311377_:oxazole 1-oxide_ppm:0_mzLogicScore:NA; 10751523_:Acetyl cyanate_ppm:0_mzLogicScore:NA; 10609055_:1,4,2-Dioxazine_ppm:0_mzLogicScore:NA; 11455991_:1,3-Oxazol-5-ol_ppm:0_mzLogicScore:NA; 28671205_:3-Nitrocyclopropene_ppm:0_mzLogicSc…		~same in all
85.0525	C4 H7 N O	9.883		800000	1000000	5000000	37.5	0.5	20	1	6	4	0.51	2.6	2.09	0.420112	0.0128537	0.0250478	55	0	0			No matches found	No matches found	No matches found	No matches found	ddMS2 for preferred ion	C4 H7 N O_ppm:-3.33_Ifit:87MatchedIso.:2			66425180_:(1Z,2E)-N-Hydroxy-2-buten-1-imine_ppm:0_mzLogicScore:NA; 67169932_:N-Cyclopropyl-N-methyleneamine oxide_ppm:0_mzLogicScore:NA; 67166549_:N-(Vinyloxy)ethenamine_ppm:0_mzLogicScore:NA; 29315324_:[(Cyclopropylmethyliumyl)amino]oxidanide_ppm:0_mzLogicScore:NA; 22376995_:2-Amino-2-butenal_ppm:0_mzLogicScore:NA; 65418720_:4-Methylene-1,2-oxazolidine_ppm:0_mzLogicScore:NA; 13792888_:Dihydro-2(…		Highest in E+, E+ >> E- > C (present in C)
85.0526	C4 H7 N O	13.206		1000000	1000000	1000000	10	2	40	1	1	0.9	0.4	0.3	-0.09	0.470195	0.679251	0.901822	55	0	0			No matches found	No matches found	No matches found	No matches found	ddMS2 for preferred ion	C4 H7 N O_ppm:-2.31_Ifit:79MatchedIso.:2			66425180_:(1Z,2E)-N-Hydroxy-2-buten-1-imine_ppm:0_mzLogicScore:NA; 67169932_:N-Cyclopropyl-N-methyleneamine oxide_ppm:0_mzLogicScore:NA; 67166549_:N-(Vinyloxy)ethenamine_ppm:0_mzLogicScore:NA; 29315324_:[(Cyclopropylmethyliumyl)amino]oxidanide_ppm:0_mzLogicScore:NA; 22376995_:2-Amino-2-butenal_ppm:0_mzLogicScore:NA; 65418720_:4-Methylene-1,2-oxazolidine_ppm:0_mzLogicScore:NA; 13792888_:Dihydro-2(…		~same in all; up in one E+ rep
85.0526	C4 H7 N O	6.917		300000	100000	100000	66.6667	30	3	0.5	0.5	1	-1.14	-1.02	0.12	0.202288	0.259007	0.957605	55	0	0			No matches found	No matches found	No matches found	No matches found	ddMS2 for preferred ion	C4 H7 N O_ppm:-2.12_Ifit:94MatchedIso.:2			66425180_:(1Z,2E)-N-Hydroxy-2-buten-1-imine_ppm:0_mzLogicScore:NA; 67169932_:N-Cyclopropyl-N-methyleneamine oxide_ppm:0_mzLogicScore:NA; 67166549_:N-(Vinyloxy)ethenamine_ppm:0_mzLogicScore:NA; 29315324_:[(Cyclopropylmethyliumyl)amino]oxidanide_ppm:0_mzLogicScore:NA; 22376995_:2-Amino-2-butenal_ppm:0_mzLogicScore:NA; 65418720_:4-Methylene-1,2-oxazolidine_ppm:0_mzLogicScore:NA; 13792888_:Dihydro-2(…		~same in all
85.0889	C5 H11 N	9.743		2000000	1000000	2000000	20	3	50	0.6	0.9	1	-0.64	-0.12	0.52	0.482243	0.898986	0.697644	30	0	0			No matches found	No matches found	No matches found	No matches found	ddMS2 for preferred ion	C5 H11 N_ppm:-2.79_Ifit:99MatchedIso.:2			11207421_:pentan-2-amine_ppm:0_mzLogicScore:NA; 67178325_:(1E)-N-Ethyl-1-propen-1-amine_ppm:0_mzLogicScore:NA; 65793824_:(1E)-1-Penten-1-amine_ppm:0_mzLogicScore:NA; 10265296_:(2Z)-N-Methyl-2-butanimine_ppm:0_mzLogicScore:NA; 466622_:(1E)-N-Methyl-1-butanimine_ppm:0_mzLogicScore:NA; 466652_:1,2,3-Trimethylaziridine_ppm:0_mzLogicScore:NA; 466508_:1,3-Dimethylazetidine_ppm:0_mzLogicScore:NA; 124371…		~same in all
85.0889	C5 H11 N	9.98		2000000	1000000	2000000	15	5	50	0.7	0.9	1	-0.59	-0.14	0.45	0.598704	0.872959	0.855427	30	0	0			No matches found	No matches found	No matches found	No matches found	ddMS2 for preferred ion	C5 H11 N_ppm:-2.73_Ifit:85MatchedIso.:3			11207421_:pentan-2-amine_ppm:0_mzLogicScore:NA; 67178325_:(1E)-N-Ethyl-1-propen-1-amine_ppm:0_mzLogicScore:NA; 65793824_:(1E)-1-Penten-1-amine_ppm:0_mzLogicScore:NA; 10265296_:(2Z)-N-Methyl-2-butanimine_ppm:0_mzLogicScore:NA; 466622_:(1E)-N-Methyl-1-butanimine_ppm:0_mzLogicScore:NA; 466652_:1,2,3-Trimethylaziridine_ppm:0_mzLogicScore:NA; 466508_:1,3-Dimethylazetidine_ppm:0_mzLogicScore:NA; 124371…		~same in all; up in one E+ rep
86.0365	C4 H6 O2	13.205		20000000	20000000	20000000	10	0.02	2	1	1	0.9	0.43	0.27	-0.16	0.0623061	0.177992	0.443282	47	0	0			No matches found	No matches found	No matches found	No matches found	ddMS2 for preferred ion	C4 H6 O2_ppm:-3.32_Ifit:82MatchedIso.:5			67171146_:(3S)-3-Methyl-2-oxetanone_ppm:0_mzLogicScore:NA; 15416599_:2,3-Dihydro-2-furanol_ppm:0_mzLogicScore:NA; 26946391_:Dimethoxyacetylene_ppm:0_mzLogicScore:NA; 8805801_:1,5-dioxaspiro(3.2)hexane_ppm:0_mzLogicScore:NA; 8232998_:2-hydroxybut-3-enal_ppm:0_mzLogicScore:NA; 57312458_:3-Methyl-2-oxiranecarbaldehyde_ppm:0_mzLogicScore:NA; 10004003_:2,3-Dihydro-3-furanol_ppm:0_mzLogicScore:NA; 9768…		~same in all; one E+ rep up
87.032	C3 H5 N O2	9.761		400000	600000	600000	25	8.33333	10	1	1	1	0.44	0.44	0.01	0.39926	0.395679	0.999945	32	0	0			No matches found	No matches found	No matches found	No matches found	ddMS2 for preferred ion	C3 H5 N O2_ppm:-0.2_Ifit:90MatchedIso.:2			67162524_:Methyl formylimidoformate_ppm:0_mzLogicScore:NA; 13501019_:(2E)-3-Hydroxyacrylamide_ppm:0_mzLogicScore:NA; 11605321_:Allyl nitrite_ppm:0_mzLogicScore:NA; 10654504_:1,2-Oxazolidin-5-one_ppm:0_mzLogicScore:NA; 10344104_:1-Hydroxy-2-azetidinone_ppm:0_mzLogicScore:NA; 26331746_:(Z)-3-aminoacrylic acid_ppm:0_mzLogicScore:NA; 8324493_:(2E)-3-Aminoacrylic acid_ppm:0_mzLogicScore:NA; 10708809_:…		~same in all
87.9918		7.362		1000000	500000	20000	60	60	100	0.5	0.03	0.05	-0.92	-5.31	-4.4	0.756385	0.0438432	0.0705875	0	0	0			No matches found	No matches found	No matches found	No matches found	ddMS2 for preferred ion						Junk
89.0213		13.216		200000	200000	200000	50	50	5	1	0.8	0.8	0.03	-0.3	-0.33	0.982557	0.997047	0.965867	0	0	0			No matches found	No matches found	No matches found	No matches found	ddMS2 for preferred ion						~same in all; big mess
89.0474	C3 H7 N O2	12.076		20000000	20000000	5000000	20	20	140	1	0.3	0.3	0.02	-1.76	-1.78	0.999971	0.388951	0.386419	33	0	0			No matches found	No matches found	No matches found	Single match found	ddMS2 for preferred ion	C3 H7 N O2_ppm:-2.66_Ifit:90MatchedIso.:2			66423762_:Ethyl methyleneazinate_ppm:0_mzLogicScore:NA; 67497017_:1,3,5-Dioxazinane_ppm:0_mzLogicScore:NA; 13354736_:1,3-Oxazolidin-2-ol_ppm:0_mzLogicScore:NA; 60999005_:(3E)-3-(Hydroxyimino)-1-propanol_ppm:0_mzLogicScore:NA; 67039198_:1,3,2-Dioxazinane_ppm:0_mzLogicScore:NA; 7875468_:(2E)-1-Hydroxy-2-propanone oxime_ppm:0_mzLogicScore:NA; 8488533_:3,3-Azetidinediol_ppm:0_mzLogicScore:NA; 1065236…	Alanine,ΔRT:-0.26	~same in all
89.0474	C3 H7 N O2	12.642		20000000	20000000	10000000	20	20	50	1	0.8	0.8	0.02	-0.39	-0.41	0.999487	0.578451	0.563826	33	0	0			No matches found	No matches found	No matches found	Single match found	ddMS2 for preferred ion	C3 H7 N O2_ppm:-2.68_Ifit:80MatchedIso.:4			66423762_:Ethyl methyleneazinate_ppm:0_mzLogicScore:NA; 67497017_:1,3,5-Dioxazinane_ppm:0_mzLogicScore:NA; 13354736_:1,3-Oxazolidin-2-ol_ppm:0_mzLogicScore:NA; 60999005_:(3E)-3-(Hydroxyimino)-1-propanol_ppm:0_mzLogicScore:NA; 67039198_:1,3,2-Dioxazinane_ppm:0_mzLogicScore:NA; 7875468_:(2E)-1-Hydroxy-2-propanone oxime_ppm:0_mzLogicScore:NA; 8488533_:3,3-Azetidinediol_ppm:0_mzLogicScore:NA; 1065236…	Alanine,ΔRT:-0.82	~same in all
90.0316	C3 H6 O3	11.316		300000	900000	3000000	33.3333	5.55556	66.6667	3	10	3	1.69	3.44	1.75	0.205439	0.0485452	0.26752	23	4	0	82.9		No matches found	No matches found	No matches found	No matches found	ddMS2 for preferred ion	C3 H6 O3_ppm:-1.43_Ifit:85MatchedIso.:3	DL-Lactic Acid_score:99.8; L-(+)-Lactic acid_score:99.9		61714322_:(2R)-2-(Hydroxymethyl)-2-oxiranol_ppm:0_mzLogicScore:NA; 10820349_:1-Hydroperoxyacetone_ppm:0_mzLogicScore:NA; 14214411_:2,2-Dihydroxypropanal_ppm:0_mzLogicScore:NA; 24590985_:3-Methyl-1,2,4-trioxolane_ppm:0_mzLogicScore:NA; 11312286_:1,2,3-Trioxane_ppm:0_mzLogicScore:NA; 128014_:Hydroxymethyl acetate_ppm:0_mzLogicScore:NA; 10629025_:1,2,4-Trioxane_ppm:0_mzLogicScore:NA; 62612_:Glycol m…		highest in E+
90.0316	C3 H6 O3	12.477		20000000	10000000	10000000	20	30	6	0.6	0.5	0.8	-0.65	-0.91	-0.25	0.14735	0.0707976	0.634393	23	6	0	79.6		No matches found	No matches found	No matches found	No matches found	ddMS2 for preferred ion	C3 H6 O3_ppm:-1.25_Ifit:90MatchedIso.:3	DL-Lactic Acid_score:99.8; L-(+)-Lactic acid_score:99.9		61714322_:(2R)-2-(Hydroxymethyl)-2-oxiranol_ppm:0_mzLogicScore:NA; 10820349_:1-Hydroperoxyacetone_ppm:0_mzLogicScore:NA; 14214411_:2,2-Dihydroxypropanal_ppm:0_mzLogicScore:NA; 24590985_:3-Methyl-1,2,4-trioxolane_ppm:0_mzLogicScore:NA; 11312286_:1,2,3-Trioxane_ppm:0_mzLogicScore:NA; 128014_:Hydroxymethyl acetate_ppm:0_mzLogicScore:NA; 10629025_:1,2,4-Trioxane_ppm:0_mzLogicScore:NA; 62612_:Glycol m…		~same in all; up in one C rep
92.0292	C3 H8 O S	3.157		90000	100000	80000	4.44444	20	62.5	1	0.8	0.8	0.11	-0.26	-0.37	0.989273	0.789349	0.717205	8	0	0			No matches found	No matches found	No matches found	No matches found	ddMS2 for other ion	C3 H8 O S_ppm:-4_Ifit:100MatchedIso.:1			25947238_:propanesulfenic acid_ppm:0_mzLogicScore:20; 2285203_:1-Sulfanyl-1-propanol_ppm:0_mzLogicScore:20; 4910091_:Corey-Chaykovsky reagent_ppm:0_mzLogicScore:20; 92975_:2,3-Mercaptopropanol_ppm:0_mzLogicScore:20; 108141_:(Methylsulfinyl)ethane_ppm:0_mzLogicScore:30; 92620_:MFCD00004878_ppm:0_mzLogicScore:20; 79578_:1731082_ppm:0_mzLogicScore:20; 71259_:4004_ppm:0_mzLogicScore:30		~same in all
92.0298	C3 H8 O S	3.144		200000	400000	300000	1.5	0.75	66.6667	2	1	0.7	0.7	0.09	-0.61	0.598402	0.979354	0.506965	8	0	0			No matches found	No matches found	No matches found	No matches found	ddMS2 for preferred ion	C3 H8 O S_ppm:2.32_Ifit:100MatchedIso.:1			25947238_:propanesulfenic acid_ppm:0_mzLogicScore:NA; 2285203_:1-Sulfanyl-1-propanol_ppm:0_mzLogicScore:NA; 4910091_:Corey-Chaykovsky reagent_ppm:0_mzLogicScore:NA; 92975_:2,3-Mercaptopropanol_ppm:0_mzLogicScore:NA; 108141_:(Methylsulfinyl)ethane_ppm:0_mzLogicScore:NA; 92620_:MFCD00004878_ppm:0_mzLogicScore:NA; 79578_:1731082_ppm:0_mzLogicScore:NA; 71259_:4004_ppm:0_mzLogicScore:NA		~same in all
92.0379		9.697		2000000	2000000	1000000	25	100	10	2	0.6	0.4	0.65	-0.66	-1.3	0.703942	0.641417	0.304869	0	0	0			No matches found	No matches found	No matches found	No matches found	ddMS2 for preferred ion						~same in all, huge mess
92.0472	C3 H8 O3	7.955		100000	40000	400000	60	100	25	0.3	4	10	-1.69	1.82	3.51	0.356254	0.474099	0.115216	7	0	0			No matches found	No matches found	No matches found	No matches found	ddMS2 for other ion	C3 H8 O3_ppm:-2.09_Ifit:88MatchedIso.:2			19285396_:2-Methoxyethyl hydroperoxide_ppm:0_mzLogicScore:17; 10627258_:2-Hydroperoxy-1-propanol_ppm:0_mzLogicScore:19; 395997_:1,1,2-Propanetriol_ppm:0_mzLogicScore:20; 9567759_:1,1,3-Propanetriol_ppm:0_mzLogicScore:18; 4401411_:Ethoxymethanediol_ppm:0_mzLogicScore:16; 2283029_:2-(Hydroxymethoxy)ethanol_ppm:0_mzLogicScore:17; 733_:glycerin_ppm:0_mzLogicScore:19		Up in E+, present in C
92.0477	C3 H8 O3	7.945		500000	300000	1000000	40	33.3333	30	0.7	3	4	-0.58	1.53	2.12	0.644873	0.131317	0.0651643	7	0	0			No matches found	No matches found	No matches found	No matches found	ddMS2 for preferred ion	C3 H8 O3_ppm:4.39_Ifit:85MatchedIso.:2			19285396_:2-Methoxyethyl hydroperoxide_ppm:0_mzLogicScore:NA; 10627258_:2-Hydroperoxy-1-propanol_ppm:0_mzLogicScore:NA; 395997_:1,1,2-Propanetriol_ppm:0_mzLogicScore:NA; 9567759_:1,1,3-Propanetriol_ppm:0_mzLogicScore:NA; 4401411_:Ethoxymethanediol_ppm:0_mzLogicScore:NA; 2283029_:2-(Hydroxymethoxy)ethanol_ppm:0_mzLogicScore:NA; 733_:glycerin_ppm:0_mzLogicScore:NA		Highest in E+, present in C and E- too
94.0528	C5 H6 N2	10.822		70000	100000	400000	142.857	100	25	1	6	4	0.58	2.48	1.91	0.733503	0.314889	0.630743	28	1	0	91.9		No matches found	No matches found	No matches found	No matches found	ddMS2 for preferred ion	C5 H6 N2_ppm:-3.12_Ifit:63MatchedIso.:2	1-Vinylimidazole_score:91.9		67162695_:3,4-Diazabicyclo[4.1.0]hepta-1,3-diene_ppm:0_mzLogicScore:33; 67157666_:2,3-Diazabicyclo[4.1.0]hepta-1,3-diene_ppm:0_mzLogicScore:40; 9073905_:2,4-Cyclopentadien-1-ylidenehydrazine_ppm:0_mzLogicScore:38; 13270175_:1-(1H-Pyrrol-2-yl)methanimine_ppm:0_mzLogicScore:45; 477784_:[(E)-2-Propenylideneamino]acetonitrile_ppm:0_mzLogicScore:53; 4515251_:(2E)-3-(1-Aziridinyl)acrylonitrile_ppm:0_mz…		Only in E+
94.0539		10.82		7000	10000	200000	1.42857	80	50	2	30	20	0.64	4.69	4.05	0.899836	0.0268902	0.0341416	0	7	0			No matches found	No matches found	No matches found	No matches found	ddMS2 for preferred ion		SSR161421_simScore:63.6; Isopropyl 4-hydroxybenzoate_simScore:68.7; 1-Phenyl-1H-pyrazolo[3,4-d]pyrimidin-4-amine_score:99.3; Allopurinol_score:99.7; Hypoxanthine_score:99.9				Only present in E+ and E-
95.9202		22.148		400000	300000	100000	10	16.6667	20	0.8	0.4	0.5	-0.3	-1.31	-1.01	0.374318	0.012987	0.0270892	0	2	0			No matches found	No matches found	No matches found	No matches found	ddMS2 for preferred ion		Flupentixol_simScore:70.1; Zuclopenthixol_simScore:70.3				~same in all Rxes
95.9332		11.072		400000	400000	300000	10	25	3.33333	0.9	0.6	0.6	-0.13	-0.77	-0.64	0.784919	0.0808777	0.135917	0	13	0			No matches found	No matches found	No matches found	No matches found	ddMS2 for preferred ion		3-Phenoxybenzoic acid_simScore:65.2; Methanesulfonic acid_simScore:65.8; GW 9508_simScore:68.3; Amoxicillin_simScore:68.3; Isopropyl 4-hydroxybenzoate_simScore:68.7; N-(6-{4-[5-(Trifluoromethyl)pyridin-2-yl]piperazino}pyridin-3-yl)methanesulfonamide_simScore:78.5				~same in all Rxes
97.9785		11.123		30000000	20000000	20000000	6.66667	10	0.5	0.9	0.7	0.7	-0.08	-0.62	-0.54	0.768636	0.0211465	0.0305336	0	4	0			No matches found	No matches found	No matches found	No matches found	ddMS2 for preferred ion		N-(6-{4-[5-(Trifluoromethyl)pyridin-2-yl]piperazino}pyridin-3-yl)methanesulfonamide_simScore:78.5				~same in all Rxes
97.9785		9.54		3000000	4000000	3000000	10	10	6.66667	1	0.8	0.7	0.31	-0.26	-0.57	0.17458	0.262073	0.0426524	0	0	0			No matches found	No matches found	No matches found	No matches found	ddMS2 for preferred ion						~same in all Rxes
99.0335		6.741		400000	200000	300000	50	2.5	33.3333	0.4	0.7	2	-1.2	-0.58	0.61	0.232937	0.57856	0.614253	0	0	0			No matches found	No matches found	No matches found	No matches found	ddMS2 for preferred ion						~same in all
99.0681	C5 H9 N O	15.023		1000000	1000000	2000000	30	50	10	1	1	1	-0.05	0.45	0.5	0.969455	0.610435	0.498654	83	18	0	56.9		No matches found	No matches found	No matches found	No matches found	ddMS2 for preferred ion	C5 H9 N O_ppm:-3.25_Ifit:92MatchedIso.:3	N1-(4-Bromo-3-methylphenyl)azepane-1-carbothioamide_simScore:65.1; Hexamethylene diisocyanate_simScore:66.1; Dicyclomine_simScore:67.8; N,N'-Dicyclohexylurea_simScore:67.9; Oleamide_simScore:77.9; CUDA_simScore:81.6; 4-Piperidone_score:54.5; 2-Ethyl-2-oxazoline_score:55.6; N-Methyl-2-pyrrolidone_score:56.2; δ-Valerolactam_score:56.9; Erucamide_score:92.8; Cyclohexylamine_score:97.9		67033931_:(3E)-1-Amino-3-penten-2-one_ppm:0_mzLogicScore:20; 67027330_:(E)-1-(Dihydro-2(3H)-furanylidene)methanamine_ppm:0_mzLogicScore:17; 67034517_:2-Methyl-5,6-dihydro-2H-1,3-oxazine_ppm:0_mzLogicScore:12; 67037248_:2-(1-Propyn-1-ylamino)ethanol_ppm:0_mzLogicScore:20; 67036291_:(1E)-3-Imino-1-penten-1-ol_ppm:0_mzLogicScore:20; 67173397_:2,3,6,7-Tetrahydro-1,2-oxazepine_ppm:0_mzLogicScore:12; 6…		~same in all; up in one E+ rep
99.9579		2.808		200000	500000	300000	100	140	100	3	1	0.5	1.33	0.37	-0.96	0.997851	0.994068	0.984914	0	0	0			No matches found	No matches found	No matches found	No matches found	ddMS2 for preferred ion						Present in all; peaks not well aligned. Maybe different in E+ and E- vs. C
99.9755		11.111		9000000	9000000	6000000	7.77778	10	1.66667	1	0.6	0.7	-0.06	-0.63	-0.57	0.865264	0.0203861	0.0264334	0	0	0			No matches found	No matches found	No matches found	No matches found	ddMS2 for preferred ion						~same in all Rxes
100.052	C5 H8 O2	2.086		30000	200000	300000	26.6667	100	33.3333	6	9	2	2.49	3.18	0.68	0.590096	0.239659	0.61855	103	0	0			No matches found	No matches found	No matches found	No matches found	ddMS2 for preferred ion	C5 H8 O2_ppm:-2.5_Ifit:77MatchedIso.:2			66425146_:3,5-Dimethyl-3H-1,2-dioxole_ppm:0_mzLogicScore:NA; 61057695_:3,4-Anhydro-1,2-dideoxypent-1-enitol_ppm:0_mzLogicScore:NA; 67158616_:4,5-Dihydro-3H-1,2-dioxepine_ppm:0_mzLogicScore:NA; 14342385_:2-Methoxy-2,3-dihydrofuran_ppm:0_mzLogicScore:NA; 9128650_:2-Methylene-1,3-dioxane_ppm:0_mzLogicScore:NA; 475095_:2-Hydroxy-4-methylcyclobutanone_ppm:0_mzLogicScore:NA; 558871_:(1Z)-1-Propen-1-yl …		~same in all
100.1	C5 H12 N2	8.016		100000	200000	90000	100	50	111.111	2	0.8	0.5	0.82	-0.3	-1.12	0.888954	0.854567	0.615955	55	0	0			No matches found	No matches found	No matches found	No matches found	ddMS2 for preferred ion	C5 H12 N2_ppm:-4.21_Ifit:95MatchedIso.:2			16304580_:3-$l^{1}-azanyl-N,N-dimethyl-propan-1-amine_ppm:0_mzLogicScore:NA; 66737968_:N-[(1E)-1-Propen-1-yl]-1,2-ethanediamine_ppm:0_mzLogicScore:NA; 67493915_:N-Ethyl-N'-vinylmethanediamine_ppm:0_mzLogicScore:NA; 67494940_:4-Imino-2-pentanamine_ppm:0_mzLogicScore:NA; 15067863_:1,4-Dimethylpyrazolidine_ppm:0_mzLogicScore:NA; 7878668_:(2E)-1-Ethyl-2-ethylidene-1-methylhydrazine_ppm:0_mzLogicScore…		~same in all
101.047	C4 H7 N O2	12.961		2000000	2000000	900000	25	3	66.6667	1	0.5	0.5	-0.02	-1.01	-1	0.99993	0.287602	0.284715	69	0	0			No matches found	No matches found	No matches found	No matches found	ddMS2 for preferred ion	C4 H7 N O2_ppm:-2.26_Ifit:81MatchedIso.:2			19031013_:Methyl (1E)-ethylidenecarbamate_ppm:0_mzLogicScore:NA; 67173782_:4,7-Dihydro-1,3,5-dioxazepine_ppm:0_mzLogicScore:NA; 67493436_:3-Hydroperoxy-2-methylpropanenitrile_ppm:0_mzLogicScore:NA; 67157620_:(2Z)-2-Hydroxy-3-(methylamino)acrylaldehyde_ppm:0_mzLogicScore:NA; 67159383_:4-Hydroperoxybutanenitrile_ppm:0_mzLogicScore:NA; 32981953_:(2Z)-3-Hydroxy-2-butenamide_ppm:0_mzLogicScore:NA; 143…		Highest in C, but reps don’t argee well
101.047	C4 H7 N O2	9.57		100000	90000	70000	70	77.7778	8.57143	0.7	0.5	0.7	-0.45	-0.87	-0.43	0.808036	0.712655	0.981202	69	0	0			No matches found	No matches found	No matches found	No matches found	ddMS2 for preferred ion	C4 H7 N O2_ppm:-2.27_Ifit:67MatchedIso.:2			19031013_:Methyl (1E)-ethylidenecarbamate_ppm:0_mzLogicScore:NA; 67173782_:4,7-Dihydro-1,3,5-dioxazepine_ppm:0_mzLogicScore:NA; 67493436_:3-Hydroperoxy-2-methylpropanenitrile_ppm:0_mzLogicScore:NA; 67157620_:(2Z)-2-Hydroxy-3-(methylamino)acrylaldehyde_ppm:0_mzLogicScore:NA; 67159383_:4-Hydroperoxybutanenitrile_ppm:0_mzLogicScore:NA; 32981953_:(2Z)-3-Hydroxy-2-butenamide_ppm:0_mzLogicScore:NA; 143…		~same in all; reps don't agree well
101.994		21.804		10000000	10000000	9000000	7	2	0.333333	1	0.8	0.8	0.12	-0.24	-0.36	0.22487	0.0483613	0.0157871	3	0	0			No matches found	No matches found	No matches found	No matches found	ddMS2 for preferred ion				18663802_:MFCD00037531_ppm:0_mzLogicScore:NA; 9150622_:3-Fluorothiophene_ppm:0_mzLogicScore:NA; 120018_:2-Fluorothiophene_ppm:0_mzLogicScore:NA		~same in all Rxes
102.033		12.494		5000000	4000000	3000000	18	7.5	6.66667	0.7	0.5	0.7	-0.42	-0.9	-0.48	0.201364	0.0313693	0.143118	0	0	0			No matches found	No matches found	No matches found	No matches found	ddMS2 for preferred ion						~same in all Rxes; one non-integrated peak that is high in E+
102.033		9.509		80000	100000	90000	37.5	1	77.7778	2	1	0.7	0.87	0.28	-0.59	0.54554	0.994776	0.592169	0	0	0			No matches found	No matches found	No matches found	No matches found	ddMS2 for preferred ion						~same in all
102.033		6.611		300000	200000	2000000	30	30	45	0.8	8	9	-0.26	2.91	3.18	0.891879	0.0259119	0.0205988	0	0	0			No matches found	No matches found	No matches found	No matches found	ddMS2 for preferred ion						Highest in E+, E+ >> C > E-, multiple peaks
102.047	C8 H6	9.577		2000000	1000000	1000000	15	7	60	0.6	0.6	0.9	-0.76	-0.86	-0.1	0.430597	0.290328	0.903437	6	0	0			No matches found	No matches found	No matches found	No matches found	ddMS2 for preferred ion	C8 H6_ppm:-2.97_Ifit:93MatchedIso.:2			65792018_:1,7-Octadiene-3,5-diyne_ppm:0_mzLogicScore:NA; 67161802_:7-Methylenebicyclo[4.1.0]hepta-1,3,5-triene_ppm:0_mzLogicScore:NA; 26537418_:Calicene_ppm:0_mzLogicScore:NA; 4574194_:Pentalene_ppm:0_mzLogicScore:NA; 70373_:Benzocyclobutadiene_ppm:0_mzLogicScore:NA; 10364_:Phenylacetylene_ppm:0_mzLogicScore:NA		~same in all; reps don't agree well
102.069		2.665		1000000	900000	1000000	20	22.2222	60	0.8	1	1	-0.39	-0.01	0.38	0.73439	0.973345	0.845974	0	0	0			No matches found	No matches found	No matches found	No matches found	ddMS2 for preferred ion						~same in all
102.079	C4 H10 N2 O	9.721		4000000	20000000	9000000	125	40	22.2222	4	2	0.6	1.95	1.26	-0.69	0.365117	0.473918	0.955235	36	0	0			No matches found	No matches found	No matches found	No matches found	ddMS2 for preferred ion	C4 H10 N2 O_ppm:-2.78_Ifit:78MatchedIso.:4			67028909_:1-(2-Methyl-2-propanyl)diazene 1-oxide_ppm:0_mzLogicScore:7; 471771_:Ethyl (1Z)-2-aminoethanimidate_ppm:0_mzLogicScore:14; 62032782_:3-Amino-2-pyrrolidinol_ppm:0_mzLogicScore:14; 18952850_:1,3-Diamino-2-butanone_ppm:0_mzLogicScore:11; 67038057_:Tetrahydro-1(2H)-pyrimidinol_ppm:0_mzLogicScore:7; 32973781_:1,1-Diamino-2-butanone_ppm:0_mzLogicScore:11; 61236895_:[(Z)-Ethyl-NNO-azoxy]ethane…		~same in all
103.045	C4 H9 N S	10.151		500000	400000	100000	1.8	10	70	0.8	0.2	0.3	-0.4	-2.19	-1.79	0.789145	0.0565406	0.090076	11	13	0			No matches found	No matches found	No matches found	No matches found	ddMS2 for preferred ion	C4 H9 N S_ppm:-3.31_Ifit:59MatchedIso.:3	4-Acetamidobutanoic acid_simScore:68.7; 3-(3-sec-Butyl-6-isopropyl-5,8,9-trimethyl-1,4,7,10,14,17-hexaoxoicosahydropyrrolo[1,2-d][1,4,7,10,13,16]oxapentaazacyclononadecin-16-yl)-2-methylpropanoic acid_simScore:68.8; Doxorubicin_simScore:74.8; [3,5-Bis(5-nitro-3-thienyl)-1H-[1,3]oxazolo[3,4-c][1,3]oxazol-7(7H)-yl]methanol_simScore:75.4; 4-Guanidinobutyric acid_simScore:76.7; DL-3-Aminoisobutyric a…		32974933_:N-Isopropylthioformamide_ppm:0_mzLogicScore:9; 15543012_:2-Aminocyclobutanethiol_ppm:0_mzLogicScore:13; 11339174_:3-Pyrrolidinethiol_ppm:0_mzLogicScore:13; 494262_:3-Methyl-1,3-thiazolidine_ppm:0_mzLogicScore:4; 10642558_:thiazinane_ppm:0_mzLogicScore:13; 107379_:1,3-Thiazinane_ppm:0_mzLogicScore:9; 10721734_:Butanethioamide_ppm:0_mzLogicScore:13; 11927_:NN-Dimethylthioacetamide_ppm:0_m…		Highest in C, lowest in E+, E-
103.067		15.459		900000	300000	1000000	55.5556	16.6667	50	0.3	2	5	-1.54	0.75	2.29	0.215321	0.463872	0.0749447	0	7	0			No matches found	No matches found	No matches found	No matches found	ddMS2 for preferred ion		Choline_score:98.2				E+ is highest, other two are there?? Super messy
103.068		15.522		300000	200000	1000000	100	50	90	0.8	4	5	-0.4	1.95	2.35	0.979264	0.336551	0.282147	0	14	0			No matches found	No matches found	No matches found	No matches found	ddMS2 for preferred ion		Choline_score:98.2				Highest in E+, but big mess
103.099	C5 H13 N O	10.336		100000	100000	200000	30	40	50	1	2	2	0.21	0.8	0.6	0.948364	0.602347	0.762702	34	93	0			No matches found	No matches found	No matches found	No matches found	ddMS2 for preferred ion	C5 H13 N O_ppm:-3.28_Ifit:91MatchedIso.:2	16-Allyl-3-sec-butyl-6-isopropyl-5,8,9-trimethyldodecahydropyrrolo[1,2-d][1,4,7,10,13,16]oxapentaazacyclononadecine-1,4,7,10,14,17(11H,16H)-hexone_simScore:67.9; 4-Acetamidobutanoic acid_simScore:68.7; 3-(3-sec-Butyl-6-isopropyl-5,8,9-trimethyl-1,4,7,10,14,17-hexaoxoicosahydropyrrolo[1,2-d][1,4,7,10,13,16]oxapentaazacyclononadecin-16-yl)-2-methylpropanoic acid_simScore:68.8; Idarubicin_simScore:6…		16331058_:N-Methoxy-2-methyl-1-propanamine_ppm:0_mzLogicScore:13; 10808764_:Ethanolisopropylamine_ppm:0_mzLogicScore:19; 9426995_:2-(Dimethylamino)-2-propanol_ppm:0_mzLogicScore:19; 261783_:1-Ethoxy-N,N-dimethylmethanamine_ppm:0_mzLogicScore:19; 2284216_:1-Amino-2,2-dimethyl-1-propanol_ppm:0_mzLogicScore:19; 467287_:1-(Aminooxy)-3-methylbutane_ppm:0_mzLogicScore:19; 76829_:(Diethylamino)methanol_…		~same in all; one E+ rep up
104.048	C4 H8 O3	6.848		1000000	2000000	3000000	40	10	3.33333	1	3	2	0.29	1.36	1.07	0.568682	0.0352464	0.0702347	0	3	0	86.2		No matches found	No matches found	No matches found	No matches found	ddMS2 for preferred ion		4-Hydroxybutyric acid (GHB)_score:61.3; 3-Hydroxybutyric acid_score:86.2				Highest in E+ but present in other two
105.043		13.385		300000	200000	100000	66.6667	15	90	0.6	0.4	0.7	-0.76	-1.23	-0.47	0.850674	0.499579	0.774941	0	7	0			No matches found	No matches found	No matches found	No matches found	ddMS2 for preferred ion		2-[1-(2,6-Dichlorophenyl)-2-nitroethyl]indane-1,3-dione_simScore:61.7; Myriocin_simScore:62.2; Cefuroxime_simScore:67.8; DL-5-Methoxytryptophan_simScore:84.4; D-(+)-Tryptophan_score:96.8; DL-Tryptophan_score:97.1				~same in all; up in one C rep
105.079	C4 H11 N O2	9.659		600000	800000	700000	16.6667	8.75	14.2857	1	1	0.9	0.43	0.29	-0.14	0.257661	0.476161	0.788841	16	2	0			No matches found	No matches found	No matches found	No matches found	ddMS2 for preferred ion	C4 H11 N O2_ppm:-2.93_Ifit:86MatchedIso.:2	Isopropyl myristate_score:94.7; Methyl palmitate_score:98.3		13558581_:1-Amino-2-methyl-1,3-propanediol_ppm:0_mzLogicScore:12; 13284830_:1-Amino-2-ethoxyethanol_ppm:0_mzLogicScore:16; 10750874_:Iminodiethanol_ppm:0_mzLogicScore:8; 11186996_:4-Amino-1,3-butanediol_ppm:0_mzLogicScore:16; 34209023_:2-(Methylamino)-1,3-propanediol_ppm:0_mzLogicScore:12; 11500235_:2-Amino-1,4-butanediol_ppm:0_mzLogicScore:16; 8053026_:1-Amino-2,2-butanediol_ppm:0_mzLogicScore:1…		~same in all; one E+ rep up
105.964		21.815		40000000	40000000	30000000	7.5	7.5	6.66667	1	0.7	0.7	0.04	-0.48	-0.52	0.905079	0.0397518	0.0311954	2	0	0			No matches found	No matches found	No matches found	No matches found	ddMS2 for preferred ion				67177050_:5H-1,2,3-Oxathiaphosphole_ppm:0_mzLogicScore:NA; 67039344_:1,3,2-Oxathiaphosphole_ppm:0_mzLogicScore:NA		~same in all Rxes
110.949		9.59		300000	300000	200000	16.6667	23.3333	1	1	0.7	0.6	0.33	-0.48	-0.81	0.425494	0.248208	0.0784357	0	3	0			No matches found	No matches found	No matches found	No matches found	ddMS2 for preferred ion		N'1-[(4-Oxo-4H-chromen-3-yl)methylidene]-3-(4-hydroxyphenyl)propanohydrazide_simScore:75; Cytarabine_score:88.7; Cytidine_score:88.8				~same in all Rxes
111.965	C H4 O2 S2	6.625		30000	40000	500000	13.3333	22.5	4	2	20	10	0.72	4.17	3.45	0.0932629	0.000705691	0.00118077	1	0	0			No matches found	No matches found	No matches found	No matches found	ddMS2 for preferred ion	C H4 O2 S2_ppm:-0.51_Ifit:90MatchedIso.:2			4422180_:Methanesulfonothioic O-acid_ppm:0_mzLogicScore:NA		v. abundant in E+, probably peak in E-, maybe peak in C
111.983	C H4 O4 S	6.637		700000	800000	6000000	28.5714	12.5	116.667	1	9	8	0.15	3.11	2.96	0.993153	0.349272	0.38644	2	0	0			No matches found	No matches found	No matches found	No matches found	ddMS2 for preferred ion	C H4 O4 S_ppm:-1.02_Ifit:84MatchedIso.:5			6171_:Hydroxymethanesulfonic acid_ppm:0_mzLogicScore:NA; 6172_:Methyl bisulfate_ppm:0_mzLogicScore:NA		~same in all; one E+ rep up
112.027	C4 H4 N2 O2	8.871		600000	300000	1000000	33.3333	10	10	0.5	2	4	-1.02	0.93	1.96	0.110338	0.110589	0.0183869	46	1	0	66.2		No matches found	No matches found	No matches found	Single match found	ddMS2 for preferred ion	C4 H4 N2 O2_ppm:-1.05_Ifit:72MatchedIso.:3	1H-Imidazole-4-carboxylic acid_score:66.2		67031467_:6-Imino-6H-1,3-oxazin-4-ol_ppm:0_mzLogicScore:14; 67033869_:4-Imino-2H-1,2-oxazin-3(4H)-one_ppm:0_mzLogicScore:10; 67030410_:1,2,6-Oxadiazepin-7(2H)-one_ppm:0_mzLogicScore:14; 67026641_:2-Diazo-1-(2-oxiranyl)ethanone_ppm:0_mzLogicScore:13; 67175947_:2-Hydroxy-3(2H)-pyridazinone_ppm:0_mzLogicScore:12; 67490989_:2,2-Dihydroxysuccinonitrile_ppm:0_mzLogicScore:11; 67168719_:(3E)-4-Nitro-3-b…	Uracil,ΔRT:-0.98	really high in one E+ sample, but otherwise comparable to other Rxes
112.027	C4 H4 N2 O2	7.306		2000000	1000000	7000000	20	3	71.4286	0.6	3	5	-0.71	1.69	2.4	0.60339	0.216612	0.0936573	46	2	0	61.5		No matches found	No matches found	No matches found	Multiple matches found	ddMS2 for preferred ion	C4 H4 N2 O2_ppm:-1.03_Ifit:48MatchedIso.:3	1H-Imidazole-4-carboxylic acid_score:66.2		67031467_:6-Imino-6H-1,3-oxazin-4-ol_ppm:0_mzLogicScore:13; 67033869_:4-Imino-2H-1,2-oxazin-3(4H)-one_ppm:0_mzLogicScore:10; 67030410_:1,2,6-Oxadiazepin-7(2H)-one_ppm:0_mzLogicScore:14; 67026641_:2-Diazo-1-(2-oxiranyl)ethanone_ppm:0_mzLogicScore:12; 67175947_:2-Hydroxy-3(2H)-pyridazinone_ppm:0_mzLogicScore:12; 67490989_:2,2-Dihydroxysuccinonitrile_ppm:0_mzLogicScore:11; 67168719_:(3E)-4-Nitro-3-b…	Uracil,ΔRT:-0.97; Uracil,ΔRT:0.58	Highest in E+, present in all 3
112.052	C6 H8 O2	2.072		8000	40000	400000	12.5	100	125	5	50	10	2.33	5.67	3.34	0.711882	0.195186	0.409501	113	10	0			No matches found	No matches found	No matches found	No matches found	ddMS2 for preferred ion	C6 H8 O2_ppm:-3.12_Ifit:80MatchedIso.:2	Methyl N5-(N-nitrocarbamimidoyl)-L-ornithinate_simScore:74.7; Microcystin-LR_simScore:76.9; 5-[(1,3-Dimethyl-1H-pyrazol-5-yl)amino]-5-oxopentanoic acid_simScore:80.9; 2-({2-[(1,3-Dimethyl-1H-pyrazol-5-yl)amino]-2-oxoethyl}sulfanyl)acetic acid_simScore:84; Hexamethylenetetramine_simScore:95.1; Acetylarginine_score:98.9		263228_:7-Oxabicyclo[4.1.0]hept-4-en-3-ol_ppm:0_mzLogicScore:31; 9380790_:Cyclopropyl acrylate_ppm:0_mzLogicScore:21; 10178868_:2-Ethoxyfuran_ppm:0_mzLogicScore:24; 9041575_:Methyl 2-methyl-2-cyclopropene-1-carboxylate_ppm:0_mzLogicScore:33; 8853551_:4-Hydroxy-4-methyl-2-cyclopenten-1-one_ppm:0_mzLogicScore:29; 8346743_:2-hydroxycyclohex-3-en-1-one_ppm:0_mzLogicScore:31; 9989972_:4,5-Dihydro-2(3H…		~same in all; up in one E+ rep
112.945		9.588		100000	100000	90000	20	40	0.0555556	1	0.8	0.7	0.16	-0.31	-0.46	0.882704	0.611447	0.400676	1	0	0			No matches found	No matches found	No matches found	No matches found	No MS2				10700674_:Chlorophosphoramidoite_ppm:0_mzLogicScore:NA		~same in all
113.993		2.478		400000	300000	300000	5	23.3333	33.3333	0.7	0.9	1	-0.46	-0.22	0.24	0.451201	0.757773	0.811186	2	22	0			No matches found	No matches found	No matches found	No matches found	ddMS2 for preferred ion		1-(3,4-Dimethylthieno[2,3-b]thiophen-2-yl)-4,4,4-trifluorobutane-1,3-dione_simScore:79; 3-[(2,2,2-Trifluoroacetyl)amino]thiophene-2-carboxamide_simScore:79; N1-[2-(4-Pyridyl)ethyl]-2,2,2-trifluoroacetamide_simScore:79; Perfluoro-tert-butyl alcohol_simScore:79; Perfluoropentanoic acid_simScore:79; Efavirenz_simScore:79.3; Ethyl 2-[(2-chlorobenzoyl)amino]-3,3,3-trifluoro-2-[(2-pyridylmethyl)amino]p…		11276941_:3-(Trifluoromethyl)dioxirane_ppm:0_mzLogicScore:NA; 10239201_:Trifluoroacetic acid_ppm:0_mzLogicScore:NA		~same in all
114.031	C5 H6 O3	9.416		100000	10000	60000	70	70	33.3333	0.06	0.4	6	-3.96	-1.42	2.54	0.0326891	0.343534	0.0953837	57	2	0			No matches found	No matches found	No matches found	No matches found	ddMS2 for preferred ion	C5 H6 O3_ppm:-1.77_Ifit:93MatchedIso.:2	Maduramicin_simScore:98.9		66423971_:2-Oxopent-5-yliumoate_ppm:0_mzLogicScore:30; 67176235_:Ethyl 3-hydroxy-2-propynoate_ppm:0_mzLogicScore:19; 67169827_:(5Z,7Z)-4H-1,2,3-Trioxocine_ppm:0_mzLogicScore:15; 67171177_:6-Hydroxy-5,6-dihydro-2H-pyran-2-one_ppm:0_mzLogicScore:21; 67177854_:3-Methoxy-2(3H)-furanone_ppm:0_mzLogicScore:25; 67159476_:(1E,4E)-1,5-Dihydroxy-1,4-pentadien-3-one_ppm:0_mzLogicScore:15; 13828658_:Acetylac…		Multiple peaks, one unique to E+, main peak highest for C
114.031	C5 H6 O3	12.488		5000000	4000000	3000000	8	12.5	6.66667	0.8	0.6	0.8	-0.35	-0.76	-0.41	0.179517	0.0274358	0.1303	57	50	0			No matches found	No matches found	No matches found	No matches found	ddMS2 for preferred ion	C5 H6 O3_ppm:-1.82_Ifit:74MatchedIso.:3	Lisinopril_simScore:64.1; Ergocristine_simScore:64.1; Bromocriptine_simScore:64.3; 4-(Tetrahydro-2-furanylcarbonyl)-N-(2-thienyl)tetrahydro-1(2H)-pyrazinecarboxamide_simScore:67.2; Cymarin_simScore:72.6; (-)-Erythromycin_simScore:72.6; Azithromycin impurity A_simScore:72.7; Digoxin_simScore:73.2; (3β,8ξ,9ξ,12β,14β)-11,12,14-Trihydroxy-20-oxopregn-5-en-3-yl 6-deoxyhexopyranosyl-(1->4)-2,6-dideoxy-…		66423971_:2-Oxopent-5-yliumoate_ppm:0_mzLogicScore:34; 67176235_:Ethyl 3-hydroxy-2-propynoate_ppm:0_mzLogicScore:34; 67169827_:(5Z,7Z)-4H-1,2,3-Trioxocine_ppm:0_mzLogicScore:25; 67171177_:6-Hydroxy-5,6-dihydro-2H-pyran-2-one_ppm:0_mzLogicScore:30; 67177854_:3-Methoxy-2(3H)-furanone_ppm:0_mzLogicScore:30; 67159476_:(1E,4E)-1,5-Dihydroxy-1,4-pentadien-3-one_ppm:0_mzLogicScore:34; 13828658_:Acetylac…		Highest in C, but reps don’t argee well
114.031	C5 H6 O3	8.97		200000	90000	60000	35	8.88889	1.66667	0.4	0.3	0.6	-1.27	-1.99	-0.73	0.0457655	0.0128938	0.162023	57	1	0			No matches found	No matches found	No matches found	No matches found	ddMS2 for preferred ion	C5 H6 O3_ppm:-1.77_Ifit:70MatchedIso.:2	Maduramicin_simScore:98.9		66423971_:2-Oxopent-5-yliumoate_ppm:0_mzLogicScore:32; 67176235_:Ethyl 3-hydroxy-2-propynoate_ppm:0_mzLogicScore:22; 67169827_:(5Z,7Z)-4H-1,2,3-Trioxocine_ppm:0_mzLogicScore:15; 67171177_:6-Hydroxy-5,6-dihydro-2H-pyran-2-one_ppm:0_mzLogicScore:23; 67177854_:3-Methoxy-2(3H)-furanone_ppm:0_mzLogicScore:27; 67159476_:(1E,4E)-1,5-Dihydroxy-1,4-pentadien-3-one_ppm:0_mzLogicScore:15; 13828658_:Acetylac…		~same in all Rxes
114.031	C5 H6 O3	9.67		20000	50000	100000	50	10	100	2	6	3	0.96	2.65	1.69	0.457087	0.0914916	0.280048	57	3	0			No matches found	No matches found	No matches found	No matches found	ddMS2 for preferred ion	C5 H6 O3_ppm:-1.77_Ifit:76MatchedIso.:2	Disuccinimidyl suberate (DSS)_simScore:63.6; Maduramicin_simScore:98.9		66423971_:2-Oxopent-5-yliumoate_ppm:0_mzLogicScore:33; 67176235_:Ethyl 3-hydroxy-2-propynoate_ppm:0_mzLogicScore:22; 67169827_:(5Z,7Z)-4H-1,2,3-Trioxocine_ppm:0_mzLogicScore:15; 67171177_:6-Hydroxy-5,6-dihydro-2H-pyran-2-one_ppm:0_mzLogicScore:23; 67177854_:3-Methoxy-2(3H)-furanone_ppm:0_mzLogicScore:27; 67159476_:(1E,4E)-1,5-Dihydroxy-1,4-pentadien-3-one_ppm:0_mzLogicScore:15; 13828658_:Acetylac…		Only in E+
114.031	C5 H6 O3	11.321		50000	200000	600000	60	5	66.6667	3	10	3	1.81	3.4	1.59	0.181441	0.0506425	0.324233	57	4	0			No matches found	No matches found	No matches found	No matches found	ddMS2 for preferred ion	C5 H6 O3_ppm:-1.77_Ifit:92MatchedIso.:2	4-(Tetrahydro-2-furanylcarbonyl)-N-(2-thienyl)tetrahydro-1(2H)-pyrazinecarboxamide_simScore:67.2; Maduramicin_simScore:98.9		66423971_:2-Oxopent-5-yliumoate_ppm:0_mzLogicScore:33; 67176235_:Ethyl 3-hydroxy-2-propynoate_ppm:0_mzLogicScore:17; 67169827_:(5Z,7Z)-4H-1,2,3-Trioxocine_ppm:0_mzLogicScore:12; 67171177_:6-Hydroxy-5,6-dihydro-2H-pyran-2-one_ppm:0_mzLogicScore:17; 67177854_:3-Methoxy-2(3H)-furanone_ppm:0_mzLogicScore:22; 67159476_:(1E,4E)-1,5-Dihydroxy-1,4-pentadien-3-one_ppm:0_mzLogicScore:12; 13828658_:Acetylac…		Highest in E+, present in all
114.043	C4 H6 N2 O2	7.119		1000000	1000000	900000	60	100	111.111	1	0.7	0.7	-0.02	-0.62	-0.59	0.992923	0.709864	0.768653	56	1	0			No matches found	No matches found	No matches found	No matches found	ddMS2 for preferred ion	C4 H6 N2 O2_ppm:-1.7_Ifit:96MatchedIso.:2	UR-144 N-(5-Bromopentyl) analog_simScore:88.3		67028419_:2,3-Dihydropyrazine 1,4-dioxide_ppm:0_mzLogicScore:13; 13350245_:4-Hydroxy-4,5-dihydro-3(2H)-pyridazinone_ppm:0_mzLogicScore:24; 67030295_:1,2-Dihydropyrazine 1,4-dioxide_ppm:0_mzLogicScore:19; 67029993_:2,5-Dihydropyrazine 1,4-dioxide_ppm:0_mzLogicScore:13; 67037251_:2,5-Dihydro-1H-imidazole-4-carbaldehyde 3-oxide_ppm:0_mzLogicScore:23; 67024091_:1-Nitroso-3-pyrrolidinone_ppm:0_mzLogic…		~same in all
115.025		11.02		1000000	2000000	1000000	40	45	100	2	1	0.6	0.77	0.03	-0.75	0.673246	0.972047	0.559881	0	305	0			No matches found	No matches found	No matches found	No matches found	ddMS2 for preferred ion		Ornithine_simScore:98.6; Argininosuccinic acid_simScore:99.1; S-Methyl-L-thiocitrulline_simScore:99.1; L(+)-Ornithine_simScore:99.5; 1-(2,2-Dimethylpropanoyl)pyrrolidine-2-carboxylic acid_simScore:99.5; L-(+)-Citrulline_score:88; N3,N4-Dimethyl-L-arginine_score:90.1; DL-Arginine_score:98.1; Proline_score:98.4; Acetylarginine_score:98.9; D-(+)-Proline_score:99.9				~same in all; big mess
115.1	C6 H13 N O	13.872		100000	100000	500000	0.8	1	40	0.8	4	5	-0.39	1.86	2.25	0.542595	0.0242157	0.0141116	94	25	0			No matches found	No matches found	No matches found	No matches found	ddMS2 for preferred ion	C6 H13 N O_ppm:-1.38_Ifit:94MatchedIso.:2	Azithromycin_simScore:60.8; Ethylene glycol tetraacetic acid (EGTA)_simScore:66.5; Levodropropizine_simScore:81.5; Captopril_simScore:96.4; Ornithine_simScore:98.6; Argininosuccinic acid_simScore:99.1; S-Methyl-L-thiocitrulline_simScore:99.1; L(+)-Ornithine_simScore:99.5; N3,N4-Dimethyl-L-arginine_score:90.1; DL-Arginine_score:98.1; Proline_score:98.4; Acetylarginine_score:98.9; D-(+)-Proline_sco…		11407534_:1-Ethoxypyrrolidine_ppm:0_mzLogicScore:10; 67155996_:1,2-Dimethylpyrrolidine 1-oxide_ppm:0_mzLogicScore:13; 67167084_:2-Amino-2,3-dimethylbutanal_ppm:0_mzLogicScore:12; 8278674_:2,2-dimethyl-1-oxido-pyrrolidin-1-ium_ppm:0_mzLogicScore:13; 10308367_:3,5-Dimethyl-1,3-oxazinane_ppm:0_mzLogicScore:9; 5192_:N-(2-Methoxy-2-methylpropyl)methanimine_ppm:0_mzLogicScore:9; 61165759_:(1E)-N-Methox…		Highest in E+, present in C, barely present in E-
115.1	C6 H13 N O	11.004		500000	90000	500000	100	55.5556	60	0.2	0.9	6	-2.68	-0.12	2.56	0.24587	0.982734	0.210367	94	174	0			No matches found	No matches found	No matches found	No matches found	ddMS2 for preferred ion	C6 H13 N O_ppm:3.48_Ifit:56MatchedIso.:2	Ornithine_simScore:98.6; Argininosuccinic acid_simScore:99.1; S-Methyl-L-thiocitrulline_simScore:99.1; L(+)-Ornithine_simScore:99.5; 1-(2,2-Dimethylpropanoyl)pyrrolidine-2-carboxylic acid_simScore:99.5; L-(+)-Citrulline_score:88; N3,N4-Dimethyl-L-arginine_score:90.1; DL-Arginine_score:98.1; Proline_score:98.4; Acetylarginine_score:98.9; D-(+)-Proline_score:99.9		11407534_:1-Ethoxypyrrolidine_ppm:0_mzLogicScore:NA; 67155996_:1,2-Dimethylpyrrolidine 1-oxide_ppm:0_mzLogicScore:NA; 67167084_:2-Amino-2,3-dimethylbutanal_ppm:0_mzLogicScore:NA; 8278674_:2,2-dimethyl-1-oxido-pyrrolidin-1-ium_ppm:0_mzLogicScore:NA; 10308367_:3,5-Dimethyl-1,3-oxazinane_ppm:0_mzLogicScore:NA; 5192_:N-(2-Methoxy-2-methylpropyl)methanimine_ppm:0_mzLogicScore:NA; 61165759_:(1E)-N-Meth…		~same in all Rxes - big mess
115.101		11.035		800000	1000000	1000000	25	20	30	2	2	0.9	0.75	0.65	-0.09	0.154923	0.214889	0.922663	0	174	0			No matches found	No matches found	No matches found	No matches found	ddMS2 for preferred ion		Ornithine_simScore:98.6; Argininosuccinic acid_simScore:99.1; S-Methyl-L-thiocitrulline_simScore:99.1; L(+)-Ornithine_simScore:99.5; 1-(2,2-Dimethylpropanoyl)pyrrolidine-2-carboxylic acid_simScore:99.5; L-(+)-Citrulline_score:88; N3,N4-Dimethyl-L-arginine_score:90.1; DL-Arginine_score:98.1; Proline_score:98.4; Acetylarginine_score:98.9; D-(+)-Proline_score:99.9				~same in all
116.058	C4 H8 N2 O2	12.895		100000	200000	300000	10	15	33.3333	1	2	2	0.56	1.25	0.69	0.354172	0.0742194	0.2771	65	49	0			No matches found	No matches found	No matches found	No matches found	ddMS2 for preferred ion	C4 H8 N2 O2_ppm:-2.64_Ifit:73MatchedIso.:2	Levodropropizine_simScore:81.5; Carbetamide_simScore:96.3; Captopril_simScore:96.4; Bicine_simScore:96.8; Ornithine_simScore:98.6; Argininosuccinic acid_simScore:99.1; S-Methyl-L-thiocitrulline_simScore:99.1; L(+)-Ornithine_simScore:99.5; 1-(2,2-Dimethylpropanoyl)pyrrolidine-2-carboxylic acid_simScore:99.5; N3,N4-Dimethyl-L-arginine_score:90.1; DL-Arginine_score:98.1; Proline_score:98.4; Betaine_…		67038650_:(Z)-2-(Allyloxy)-1-methyldiazene 1-oxide_ppm:0_mzLogicScore:8; 19985728_:Nitroso-5-methyl-1,3-oxazolidine_ppm:0_mzLogicScore:17; 13915654_:2,3,5,6-tetrahydropyrazine 1,4-dioxide_ppm:0_mzLogicScore:17; 66424588_:N,N'-Dimethyl-2-oxoacetohydrazide_ppm:0_mzLogicScore:17; 67176720_:4-Hydroxytetrahydro-3(2H)-pyridazinone_ppm:0_mzLogicScore:13; 67160942_:(E)-1-Allyl-2-methoxydiazene 1-oxide_pp…		~same in all Rxes; up in one E+ rep
116.066		11.051		30000000	30000000	20000000	3.33333	6.66667	15	1	0.8	0.8	-0.02	-0.33	-0.32	0.990293	0.174043	0.194824	52	348	0			No matches found	No matches found	No matches found	No matches found	ddMS2 for preferred ion		Ornithine_simScore:98.6; Argininosuccinic acid_simScore:99.1; S-Methyl-L-thiocitrulline_simScore:99.1; L(+)-Ornithine_simScore:99.5; 1-(2,2-Dimethylpropanoyl)pyrrolidine-2-carboxylic acid_simScore:99.5; L-(+)-Citrulline_score:88; N3,N4-Dimethyl-L-arginine_score:90.1; DL-Arginine_score:98.1; Proline_score:98.4; Acetylarginine_score:98.9; D-(+)-Proline_score:99.9		67036080_:(2S)-2-Propylthietane_ppm:0_mzLogicScore:NA; 67026763_:3-Ethyl-3-methylthietane_ppm:0_mzLogicScore:NA; 67162222_:(2S,4R)-2-Ethyl-4-methylthietane_ppm:0_mzLogicScore:NA; 67161944_:(2S,3S)-2-Ethyl-3-methylthietane_ppm:0_mzLogicScore:NA; 58606664_:2-Isopropylthietane_ppm:0_mzLogicScore:NA; 67028675_:[(3-Methyl-2-buten-1-yl)oxy]silane_ppm:0_mzLogicScore:NA; 67037303_:(2S,3R)-2-Ethyl-3-methy…		~same in all Rxes
116.095	C5 H12 N2 O	15.036		700000	700000	1000000	28.5714	42.8571	10	1	1	1	-0.05	0.48	0.53	0.969029	0.582516	0.473616	44	18	0			No matches found	No matches found	No matches found	No matches found	ddMS2 for preferred ion	C5 H12 N2 O_ppm:-2.61_Ifit:81MatchedIso.:2	Levodropropizine_simScore:81.5; Netilmicin_simScore:81.9; Carbetamide_simScore:96.3; Bicine_simScore:96.8; 5-Aminovaleric acid_score:96.9; Betaine_score:98.8; Valine_score:99.1		66738085_:N-Methyl-4-nitroso-1-butanamine_ppm:0_mzLogicScore:16; 67036833_:(1E)-2-Ethoxy-1-propene-1,3-diamine_ppm:0_mzLogicScore:16; 67495635_:2-Ethoxy-2-propene-1,1-diamine_ppm:0_mzLogicScore:16; 67157245_:1-Methoxyhexahydropyrimidine_ppm:0_mzLogicScore:16; 67166261_:(4R)-4-Aminopentanamide_ppm:0_mzLogicScore:11; 14944025_:3,5-Diamino-2-pentanone_ppm:0_mzLogicScore:16; 62981744_:2,4-Dimethyl-1,…		Highest in E+, present in all
116.131	C6 H16 N2	9.913		400000	700000	500000	75	71.4286	80	2	1	0.7	0.95	0.47	-0.49	0.693853	0.926464	0.880848	42	5	0			No matches found	No matches found	No matches found	No matches found	ddMS2 for preferred ion	C6 H16 N2_ppm:-2.69_Ifit:90MatchedIso.:2	Carbetamide_simScore:96.3; Bicine_simScore:96.8; 5-Aminovaleric acid_score:96.9; Betaine_score:98.8; Valine_score:99.1		10724453_:N,N-Diethylethanediamine_ppm:0_mzLogicScore:30; 10732229_:tetramethyldiaminoethane_ppm:0_mzLogicScore:10; 19205896_:N,N'-Dimethyl-2,3-butanediamine_ppm:0_mzLogicScore:15; 15724036_:N~1~,N~1~,N~2~-Trimethyl-1,2-propanediamine_ppm:0_mzLogicScore:20; 11567892_:1,3-Hexanediamine_ppm:0_mzLogicScore:10; 472447_:1-Isopropyl-2-propylhydrazine_ppm:0_mzLogicScore:10; 480332_:1-Ethyl-1-isobutylhyd…		~same in all; reps don't agree well
117.079	C5 H11 N O2	3.758		1000000	500000	800000	50	6	25	0.4	0.6	2	-1.48	-0.76	0.72	0.0535352	0.237296	0.265512	99	0	0			No matches found	No matches found	No matches found	No matches found	ddMS2 for preferred ion	C5 H11 N O2_ppm:-2.64_Ifit:71MatchedIso.:3			67036086_:3-Methyl-3-nitroso-2-butanol_ppm:0_mzLogicScore:NA; 67024886_:5-Ethoxy-1,3-oxazolidine_ppm:0_mzLogicScore:NA; 14455654_:2,6-Piperidinediol_ppm:0_mzLogicScore:NA; 67031483_:1-Piperidinol 1-oxide_ppm:0_mzLogicScore:NA; 10814156_:2-(1,3-Dioxolan-4-yl)ethanamine_ppm:0_mzLogicScore:NA; 476893_:2-Methoxy-N-methylpropanamide_ppm:0_mzLogicScore:NA; 9139677_:(2S,3S,4R)-2-Methyl-3,4-pyrrolidinedi…		~same in all Rxes; 2 peaks not integrated, highest in E+
117.115	C6 H15 N O	14.484		1000000	500000	6000000	10	60	83.3333	0.4	5	10	-1.25	2.19	3.44	0.471057	0.324139	0.10582	38	2	0	79.3		No matches found	No matches found	No matches found	No matches found	ddMS2 for preferred ion	C6 H15 N O_ppm:-2.91_Ifit:58MatchedIso.:5	N,N-Diethylethanolamine_score:84.2		66000496_:2-(Ethylamino)-2-butanol_ppm:0_mzLogicScore:17; 10650609_:1-Amino-1-hexanol_ppm:0_mzLogicScore:9; 10563686_:_ppm:0_mzLogicScore:22; 14810099_:N-Ethoxy-N-ethylethanamine_ppm:0_mzLogicScore:17; 11650026_:1-(Aminooxy)hexane_ppm:0_mzLogicScore:9; 476264_:4-Amino-1-hexanol_ppm:0_mzLogicScore:9; 476013_:2-Ethoxy-N,N-dimethylethanamine_ppm:0_mzLogicScore:22; 3393368_:MFCD00026730_ppm:0_mzLogic…		Higher in E+, but inconsistent across reps
117.118		9.648		10000	70000	500000	100	71.4286	20	6	40	8	2.53	5.45	2.92	0.223556	0.0428629	0.204945	0	5	0			No matches found	No matches found	No matches found	No matches found	ddMS2 for preferred ion		Carbetamide_simScore:96.3; Bicine_simScore:96.8; 5-Aminovaleric acid_score:96.9; Betaine_score:98.8; Valine_score:99.1				In E+, maybe oneE-
117.936		9.609		1000000	700000	500000	60	28.5714	12	0.7	0.5	0.7	-0.6	-1.1	-0.51	0.753204	0.397106	0.743301	1	0	0			No matches found	No matches found	No matches found	No matches found	ddMS2 for preferred ion				22834_:Chromic acid_ppm:0_mzLogicScore:NA		~same in all
117.967		22.144		3000000	3000000	1000000	10	3.33333	6	1	0.6	0.6	0	-0.79	-0.79	0.99652	0.0167426	0.0161601	0	0	0			No matches found	No matches found	No matches found	No matches found	ddMS2 for preferred ion						~same in all Rxes
118.027	C4 H6 O4	14.015		1000000	2000000	800000	20	15	3.75	1	0.6	0.5	0.29	-0.74	-1.03	0.411217	0.0639399	0.026796	21	2	0			No matches found	No matches found	No matches found	No matches found	ddMS2 for preferred ion	C4 H6 O4_ppm:-0.34_Ifit:68MatchedIso.:3	Chloramben_simScore:80.4		67161779_:2,2'-Dioxydiacetaldehyde_ppm:0_mzLogicScore:NA; 10017681_:3,3'-Dimethyl-3,3'-bidioxirane_ppm:0_mzLogicScore:NA; 67031203_:1,2,4,7-Tetraoxaspiro[2.5]octane_ppm:0_mzLogicScore:NA; 67031159_:1-Hydroxy-2-oxoethyl acetate_ppm:0_mzLogicScore:NA; 16146439_:3,4-Dihydroxy-2-oxobutanal_ppm:0_mzLogicScore:NA; 10137246_:4-Hydroxy-2-oxobutanoic acid_ppm:0_mzLogicScore:NA; 14491053_:2-Hydroxy-3-oxobu…		~same in all Rxes
118.074	C4 H10 N2 O2	9.805		2000000	5000000	5000000	20	20	60	2	2	1	0.92	1.12	0.2	0.340672	0.283737	0.977743	53	5	0			No matches found	No matches found	No matches found	No matches found	ddMS2 for preferred ion	C4 H10 N2 O2_ppm:-2.52_Ifit:90MatchedIso.:4	Carbetamide_simScore:96.3; Bicine_simScore:96.8; 5-Aminovaleric acid_score:96.9; Betaine_score:98.8; Valine_score:99.1		67152752_:N-(1-Hydroxyethyl)glycinamide_ppm:0_mzLogicScore:21; 67037283_:L-Homoserinamide_ppm:0_mzLogicScore:16; 65793614_:1-[(2,2-Dimethylhydrazino)oxy]ethanone_ppm:0_mzLogicScore:16; 19962352_:1-Methoxy-ethyl-methylnitrosamine_ppm:0_mzLogicScore:16; 67024969_:2-[(2-Nitrosoethyl)amino]ethanol_ppm:0_mzLogicScore:27; 67159430_:2-(2-Nitrosoethoxy)ethanamine_ppm:0_mzLogicScore:16; 67164091_:3-(2-Met…		~same in all
119.073	C8 H9 N	9.58		2000000	1000000	1000000	15	9	60	0.6	0.6	0.9	-0.76	-0.85	-0.09	0.423564	0.294756	0.917328	33	7	0			No matches found	No matches found	No matches found	No matches found	ddMS2 for preferred ion	C8 H9 N_ppm:-2.85_Ifit:93MatchedIso.:2	Levodropropizine_simScore:81.5; Netilmicin_simScore:81.9; Carbetamide_simScore:96.3; Bicine_simScore:96.8; 5-Aminovaleric acid_score:96.9; Betaine_score:98.8; Valine_score:99.1		67037923_:(3E,5E)-3,5,7-Octatrienenitrile_ppm:0_mzLogicScore:5; 67024240_:2,3-Dihydroindolizine_ppm:0_mzLogicScore:26; 62834025_:(2E)-2-(2-Propen-1-ylidene)-1,2-dihydropyridine_ppm:0_mzLogicScore:16; 13424776_:1-Phenylethanimine_ppm:0_mzLogicScore:5; 9632526_:1-Methyl-2-(2-propyn-1-yl)-1H-pyrrole_ppm:0_mzLogicScore:21; 13479451_:3-Methyl-4-vinylpyridine_ppm:0_mzLogicScore:5; 5254694_:N-Vinylanili…		~same in all; reps don't agree well
119.094	C5 H13 N O2	16.728		200000	100000	300000	10	30	1.33333	0.7	1	2	-0.45	0.55	0.99	0.275189	0.200022	0.0485627	10	0	0			No matches found	No matches found	No matches found	No matches found	ddMS2 for preferred ion	C5 H13 N O2_ppm:-2.52_Ifit:90MatchedIso.:2			472579_:5-(Hydroxyamino)-1-pentanol_ppm:0_mzLogicScore:12; 487095_:2-(Methoxyamino)-2-methyl-1-propanol_ppm:0_mzLogicScore:8; 15604008_:2-[(2-Hydroxyethyl)amino]-1-propanol_ppm:0_mzLogicScore:10; 8233042_:MFCD15474854_ppm:0_mzLogicScore:8; 454052_:2-(2-Methoxyethoxy)ethanamine_ppm:0_mzLogicScore:8; 71410_:Dimethylamino-2,3-propanediol_ppm:0_mzLogicScore:10; 7981_:2-Amino-2-ethyl-1,3-propanediol_p…		E+ mildly up compared to E- and C
120.042	C4 H8 O4	12.478		1000000	800000	700000	40	12.5	10	0.6	0.4	0.8	-0.85	-1.16	-0.31	0.124979	0.0580212	0.587931	36	37	0			No matches found	No matches found	No matches found	No matches found	ddMS2 for preferred ion	C4 H8 O4_ppm:-1.9_Ifit:71MatchedIso.:3	(1S,4R,6S)-1,3,3-Trimethyl-2-oxabicyclo[2.2.2]oct-6-yl hexopyranoside_simScore:78.4; Mussaenosidic acid_simScore:78.6; 8-Oxo-9-(3,4,5-trimethoxyphenyl)-5,5a,6,8,8a,9-hexahydrofuro[3',4':6,7]naphtho[2,3-d][1,3]dioxol-5-yl hexopyranoside_simScore:79.5; (1β,3β,8ξ,9ξ)-1-Acetoxy-3-{[(1R)-4-O-(6-deoxy-3-O-methylhexopyranosyl)hexopyranosyl]oxy}-14-hydroxycard-20(22)-enolide_simScore:79.8; 4-(3-Hydroxybu…		65998582_:Dihydroxymethyl propionate_ppm:0_mzLogicScore:17; 67493097_:2-Methoxy-1,3-dioxolan-2-ol_ppm:0_mzLogicScore:18; 67160971_:4,4,4-Trihydroxybutanal_ppm:0_mzLogicScore:20; 67168295_:2-Methyl-1-propene-1,1,3,3-tetrol_ppm:0_mzLogicScore:17; 67032843_:1,2-Dihydroxypropyl formate_ppm:0_mzLogicScore:20; 66424978_:2-(Hydroxymethyl)-1-propene-1,1,3-triol_ppm:0_mzLogicScore:17; 21406292_:1-Hydroxye…		~same in all
120.983	C2 H3 N O3 S	6.411		1000000	2000000	4000000	60	20	22.5	2	2	1	0.79	1.29	0.5	0.275307	0.109096	0.570707	2	5	0			No matches found	No matches found	No matches found	No matches found	ddMS2 for preferred ion	C2 H3 N O3 S_ppm:-0.68_Ifit:82MatchedIso.:5	N4-(2,1,3-Benzoxadiazol-5-yl)morpholine-4-carboxamide_simScore:78.5; 1-(4,7-Dimethylpyrazolo[5,1-c][1,2,4]triazin-3-yl)ethan-1-one_simScore:89.9; N1-Tetrahydrofuran-2-ylmethyl-2-(3-pyridylmethylidene)hydrazine-1-carbothioamide_simScore:90.1		67139940_:Nitroso(sulfanyl)acetic acid_ppm:0_mzLogicScore:23; 67157112_:Hydroxy(nitroso)ethanethioic O-acid_ppm:0_mzLogicScore:19		~same in all; up in one E+ rep
121.938		22.08		600000	600000	400000	6.66667	5	5	1	0.7	0.7	0	-0.55	-0.55	0.999719	0.0182589	0.0180705	0	55	0			No matches found	No matches found	No matches found	No matches found	ddMS2 for preferred ion		N-[(2-Chloro-6-fluorobenzyl)oxy]-2-cyano-3-(dimethylamino)acrylamide_simScore:84.3; (1,5-Dimethyl-1H-pyrazol-3-yl)[4-(2-pyrimidinyl)piperazino]methanone_simScore:84.3; 1-(2,4-Dimethyl-1,3-oxazol-5-yl)ethan-1-one 1-(2,4,6-trichlorophenyl)hydrazone_simScore:84.3; Methyl 2-cyano-3-(dimethylamino)acrylate_simScore:84.4; 2-(Cyclopropylcarbonyl)-3-(dimethylamino)acrylonitrile_simScore:84.5; N1-Methyl-2…				~same in all Rxes
122.058	C4 H10 O4	9.575		50000	6000	100000	20	1.66667	20	0.1	2	20	-2.89	1.08	3.97	0.00352822	0.0552669	0.00141474	7	1	0			No matches found	No matches found	No matches found	No matches found	ddMS2 for preferred ion	C4 H10 O4_ppm:-1.83_Ifit:100MatchedIso.:1	N1-Tetrahydrofuran-2-ylmethyl-2-(3-pyridylmethylidene)hydrazine-1-carbothioamide_simScore:90.1		13464876_:1-Methoxy-1,2,3-propanetriol_ppm:0_mzLogicScore:35; 2299867_:1-(Ethylperoxy)ethyl hydroperoxide_ppm:0_mzLogicScore:20; 56287_:Dimethylol glycol_ppm:0_mzLogicScore:22; 393447_:D-TREITOL_ppm:0_mzLogicScore:37; 147828_:threitol_ppm:0_mzLogicScore:37; 192963_:Erythritol_ppm:0_mzLogicScore:37; 13835932_:Erythritol_ppm:0_mzLogicScore:37		Present in E+ and C
123.079	C6 H9 N3	10.899		900000	1000000	500000	33.3333	8	40	1	0.5	0.5	0.16	-0.89	-1.05	0.875703	0.233056	0.152211	44	2	0			No matches found	No matches found	No matches found	No matches found	ddMS2 for preferred ion	C6 H9 N3_ppm:-2.87_Ifit:80MatchedIso.:2	Saxitoxin_simScore:69.1; 1-Methylhistidine_score:97.7		67035851_:3-(2,5-Dihydro-1H-pyrazol-1-yl)propanenitrile_ppm:0_mzLogicScore:NA; 65792110_:2,3,7,7a-Tetrahydro-1H-imidazo[4,5-c]pyridine_ppm:0_mzLogicScore:NA; 67172631_:1,2,3,3a-Tetrahydropyrazolo[1,5-c]pyrimidine_ppm:0_mzLogicScore:NA; 67174328_:2,3,3a,4-Tetrahydro-1H-pyrazolo[3,4-b]pyridine_ppm:0_mzLogicScore:NA; 67174527_:1,2,3,3a-Tetrahydropyrazolo[1,5-a]pyrimidine_ppm:0_mzLogicScore:NA; 67170…		~same in all Rxes
123.975		21.813		5000000	5000000	3000000	12	0.2	10	1	0.7	0.7	0.13	-0.42	-0.55	0.610022	0.0939411	0.047117	5	29	0			No matches found	No matches found	No matches found	No matches found	ddMS2 for preferred ion		Oregonin_simScore:79.3; Herkinorin_simScore:79.4; N'-(3,4-Dimethoxyphenethyl)-N,N-dimethylthiourea_simScore:79.6; 25H-NBOH_simScore:80.1; Cyclo(glycyltryptophylprolylglycylvalylglycyl-β-hydroxytyrosyl)_simScore:80.3; 2,3-Dinitrotoluene_simScore:82.7; Isoxaben_simScore:83.4; Metaraminol_simScore:83.6; CB-52_simScore:83.6; Chloramphenicol_simScore:84.1		10286945_:1,3,2-Oxathiaphospholane 2-oxide_ppm:0_mzLogicScore:14; 9117642_:2-Propene-1-sulfinyl chloride_ppm:0_mzLogicScore:8; 16796_:S-(Chloromethyl) ethanethioate_ppm:0_mzLogicScore:14; 123369_:trisilylphosphine_ppm:0_mzLogicScore:0; 17059_:FG3855000_ppm:0_mzLogicScore:7		~same in all Rxes
123.983	C2 H4 O4 S	6.642		300000	300000	600000	20	10	16.6667	1	2	2	0.44	1.18	0.74	0.328474	0.0418652	0.138427	3	0	0			No matches found	No matches found	No matches found	No matches found	ddMS2 for preferred ion	C4 H N2 O P_ppm:2.95_Ifit:100MatchedIso.:1; C2 H4 O4 S_ppm:-0.11_Ifit:96MatchedIso.:2			75262_:Vinyl hydrogen sulfate_ppm:0_mzLogicScore:7; 140827_:sulfoacetaldehyde_ppm:0_mzLogicScore:14; 13456_:1,3,2-Dioxathiolane 2,2-dioxide_ppm:0_mzLogicScore:7		Highest in E+, present in all 3
124.1	C7 H12 N2	9.843		300000	80000	500000	33.3333	2.5	60	0.3	2	6	-1.83	0.84	2.67	0.148465	0.580646	0.0662094	49	4	0			No matches found	No matches found	No matches found	No matches found	ddMS2 for preferred ion	C7 H12 N2_ppm:-2.65_Ifit:91MatchedIso.:3	Chlorhexidine_simScore:61.5; 2,4-Dimethoxybenzaldehyde 1-(4-methyl-6-oxo-1,6-dihydropyrimidin-2-yl)hydrazone_simScore:88.6; Decarbamoyl-neosaxitoxin_simScore:88.7; 5-Methylcytosine_score:70		67036444_:(1S,4R)-Bicyclo[2.2.1]hept-2-ene-1,2-diamine_ppm:0_mzLogicScore:17; 28542211_:6,7-Diazabicyclo[3.2.2]non-6-ene_ppm:0_mzLogicScore:17; 67492739_:2,3,4,5,6,7-Hexahydro-1H-indazole_ppm:0_mzLogicScore:28; 29335533_:1,4-Dimethyl-1,2-dihydro-2-pyridinamine_ppm:0_mzLogicScore:28; 67498479_:3-Isopropenyl-3-methyl-4,5-dihydro-3H-pyrazole_ppm:0_mzLogicScore:22; 10677116_:1,2,6,7,8,8a-Hexahydropyr…		~same in all Rxes
125.047	C6 H7 N O2	6.849		70000	90000	300000	42.8571	4.44444	66.6667	1	5	3	0.41	2.21	1.8	0.829042	0.152856	0.255798	85	34	0			No matches found	No matches found	No matches found	No matches found	ddMS2 for preferred ion	C6 H7 N O2_ppm:-2.52_Ifit:93MatchedIso.:2	Simetone_simScore:75.7; Simetryn_simScore:97.4; Simazine_simScore:97.4; Sebuthylazine-desethyl_simScore:97.4; N4-Acetyl sulfamethazine_simScore:97.5; N3-(1,3,5-Trimethyl-1H-pyrazol-4-yl)-2,5-dichlorothiophene-3-sulfonamide_simScore:98.3; N-(4,6-Dimethyl-2-pyrimidinyl)-4-({[2-(trifluoromethyl)anilino]carbonyl}amino)benzenesulfonamide_simScore:98.3; Sulfamethazine_simScore:98.4; Sulfisomidine_simSc…		67027513_:(3Z)-4-Cyano-3-methyl-3-butenoic acid_ppm:0_mzLogicScore:27; 67028818_:6-Imino-2,4-cyclohexadiene-1,2-diol_ppm:0_mzLogicScore:27; 67036115_:3-(Aminomethyl)-2-furaldehyde_ppm:0_mzLogicScore:20; 67036145_:(5Z,7Z)-2H-1,2-Oxazocin-3(4H)-one_ppm:0_mzLogicScore:22; 67025711_:2-Methyl-5-nitroso-2H-pyran_ppm:0_mzLogicScore:18; 67159994_:Hydroxy(phenoxy)amine_ppm:0_mzLogicScore:9; 67159690_:3-Im…		Highest in E+
125.059	C5 H7 N3 O	9.851		300000	100000	500000	16.6667	5	40	0.4	2	4	-1.21	0.78	1.99	0.11743	0.32138	0.0365866	41	1	0	70		No matches found	No matches found	No matches found	No matches found	ddMS2 for preferred ion	C5 H7 N3 O_ppm:-2.72_Ifit:79MatchedIso.:3	5-Methylcytosine_score:70		67025131_:1-(1H-Pyrrol-1-yl)urea_ppm:0_mzLogicScore:21; 67494146_:1-Nitroso-3-vinyl-4,5-dihydro-1H-pyrazole_ppm:0_mzLogicScore:16; 67156557_:4-(Dimethylamino)-3H-pyrazol-3-one_ppm:0_mzLogicScore:21; 67159654_:3-Amino-6-methyl-4(3H)-pyridazinone_ppm:0_mzLogicScore:16; 62859799_:4,6-Dimethyl-1,2,3-triazin-5-ol_ppm:0_mzLogicScore:5; 37700136_:1-(1H-Pyrrol-2-yl)urea_ppm:0_mzLogicScore:32; 44788580_:1…		Highest in E+, present in C and E-; peak unique to E+ also present
125.095	C6 H11 N3	14.696		100000	40000	70000	30	15	42.8571	0.3	0.5	2	-1.8	-0.89	0.91	0.0561107	0.229759	0.293158	34	6	0	64.1		No matches found	No matches found	No matches found	No matches found	ddMS2 for preferred ion	C6 H11 N3_ppm:-2.66_Ifit:77MatchedIso.:2	Saxitoxin_simScore:69.1; Neosaxitoxin_simScore:88.6; α-Methylhistamine_score:63.8; N-Methylhistamine_score:64.1		67024463_:1,2,3,5,6,7-Hexahydroimidazo[1,5-c]pyrimidine_ppm:0_mzLogicScore:24; 67169955_:2,3,4,4a,5,6-Hexahydro-1H-pyrrolo[3,2-d]pyrimidine_ppm:0_mzLogicScore:31; 67498495_:4-Methyl-3,4-dihydro-3,4-pyridinediamine_ppm:0_mzLogicScore:31; 21376238_:2-hydrazino-1-methylpyridine_ppm:0_mzLogicScore:19; 67167804_:2,3,4,4a,5,6-Hexahydro-1H-pyrrolo[2,3-d]pyrimidine_ppm:0_mzLogicScore:27; 485229_:5-Butyl-…		~same in all
126.018	C3 H2 N4 O2	12.299		200000	200000	300000	25	5	13.3333	1	2	1	0.16	0.63	0.46	0.735113	0.135731	0.26471	4	18	0			No matches found	No matches found	No matches found	No matches found	ddMS2 for preferred ion	C3 H2 N4 O2_ppm:-1.01_Ifit:100MatchedIso.:1	Taurocholic acid_simScore:89.4; N-Arachidonoyl taurine_simScore:90.6; N-Palmitoyl taurine_simScore:90.7; N-Stearoyl taurine_simScore:91.2; Guanidinoethyl sulfonate_simScore:93.3; Taurine_score:92.2		67493906_:4-[(Oxido-lambda~5~-azanylidyne)methyl]-1,2,5-oxadiazol-3-amine_ppm:0_mzLogicScore:23; 67030937_:2-Nitro-1,3,5-triazine_ppm:0_mzLogicScore:10; 29318241_:4-Nitro-1,2,3-triazine_ppm:0_mzLogicScore:10; 24183670_:4-Amino-1,2,5-oxadiazole-3-carbonitrile 2-oxide_ppm:0_mzLogicScore:23		Highest in E+, but not super consistent
126.031	C6 H6 O3	13.131		4000	20000	300000	22.5	45	133.333	5	80	20	2.2	6.26	4.06	0.365531	0.0488909	0.154983	57	0	0			No matches found	No matches found	No matches found	No matches found	ddMS2 for preferred ion	C6 H6 O3_ppm:-2.18_Ifit:80MatchedIso.:2			67176400_:5,6-Dihydro-4H-cyclopenta[d][1,3]dioxol-2-one_ppm:0_mzLogicScore:12; 67176596_:2-Hydroperoxy-2,4-cyclohexadien-1-one_ppm:0_mzLogicScore:12; 67169398_:(4Z,6Z,8Z)-1,2,3-Trioxonine_ppm:0_mzLogicScore:12; 67498282_:2-(2-Propyn-1-yloxy)-1,4-dioxaspiro[2.2]pentane_ppm:0_mzLogicScore:12; 4934394_:5-Hydroxy-6-methyl-2H-pyran-2-one_ppm:0_mzLogicScore:15; 13281751_:hexane-1,3,6-trione_ppm:0_mzLog…		Only in E+, maybe E- as well
126.043	C5 H6 N2 O2	7.013		40000	30000	400000	7.5	33.3333	12.5	0.9	10	10	-0.14	3.29	3.43	0.84233	0.0037798	0.00323782	74	3	0			No matches found	No matches found	No matches found	No matches found	ddMS2 for preferred ion	C5 H6 N2 O2_ppm:-2.26_Ifit:71MatchedIso.:3	Cyclo(glycyl-N5-acetyl-N5-hydroxyornithyl-N5-acetyl-N5-hydroxyornithyl-N5-acetyl-N5-hydroxyornithylglycylglycyl)_simScore:65; Hydroxyacetildenafil_simScore:74.6; Microcystin-LR_simScore:76.9		67028476_:(2E)-2-Cyano-3-hydroxy-2-butenamide_ppm:0_mzLogicScore:NA; 67028102_:1-(3-Oxido-4H-imidazol-5-yl)ethanone_ppm:0_mzLogicScore:NA; 67154432_:(4E)-4-(Hydroxyimino)-3,4-dihydro-2(1H)-pyridinone_ppm:0_mzLogicScore:NA; 10797221_:3-Methyl-1H-pyrazole-1-carboxylic acid_ppm:0_mzLogicScore:NA; 67174083_:2H-1,2-Oxazine-3-carboxamide_ppm:0_mzLogicScore:NA; 67169654_:(5Z,7Z)-2,3-Dihydro-4H-1,2,3-oxa…		Highest in E+, but small real-looking peaks in E- and C
126.043	C5 H6 N2 O2	3.762		300000	200000	300000	10	150	66.6667	0.8	1	2	-0.3	0.33	0.62	0.703635	0.994414	0.651613	74	1	0			No matches found	No matches found	No matches found	No matches found	ddMS2 for preferred ion	C5 H6 N2 O2_ppm:-0.59_Ifit:68MatchedIso.:2	2,4-Dimethoxybenzaldehyde 1-(4-methyl-6-oxo-1,6-dihydropyrimidin-2-yl)hydrazone_simScore:88.6		67028476_:(2E)-2-Cyano-3-hydroxy-2-butenamide_ppm:0_mzLogicScore:32; 67028102_:1-(3-Oxido-4H-imidazol-5-yl)ethanone_ppm:0_mzLogicScore:18; 67154432_:(4E)-4-(Hydroxyimino)-3,4-dihydro-2(1H)-pyridinone_ppm:0_mzLogicScore:30; 10797221_:3-Methyl-1H-pyrazole-1-carboxylic acid_ppm:0_mzLogicScore:35; 67174083_:2H-1,2-Oxazine-3-carboxamide_ppm:0_mzLogicScore:33; 67169654_:(5Z,7Z)-2,3-Dihydro-4H-1,2,3-oxa…		Only in E+
127.009	C5 H5 N O S	6.682		70000	70000	300000	28.5714	42.8571	100	0.9	4	5	-0.11	2.08	2.19	0.983091	0.264339	0.226216	23	1	0			No matches found	No matches found	No matches found	No matches found	ddMS2 for preferred ion	C5 H5 N O S_ppm:-0.37_Ifit:67MatchedIso.:3	2,4-Dimethoxybenzaldehyde 1-(4-methyl-6-oxo-1,6-dihydropyrimidin-2-yl)hydrazone_simScore:88.6		67036324_:(3E)-3-(Aminomethylene)-2(3H)-thiophenone_ppm:0_mzLogicScore:12; 67177057_:2,5-Bis(methylene)-1,3-thiazolidin-4-one_ppm:0_mzLogicScore:12; 10618963_:2(1H)-Pyridinethione 1-oxide_ppm:0_mzLogicScore:12; 67155384_:2H-1,2-Thiazine-6-carbaldehyde_ppm:0_mzLogicScore:12; 67029907_:1-Sulfanyl-2(1H)-pyridinone_ppm:0_mzLogicScore:15; 21865229_:penem_ppm:0_mzLogicScore:9; 11259769_:1,2-Thiazepin-3…		~same in all Rxes; up in one E+ rep
127.01		12.301		300000	400000	500000	26.6667	10	12	1	2	1	0.11	0.61	0.49	0.852263	0.141088	0.224618	0	6	0			No matches found	No matches found	No matches found	No matches found	ddMS2 for preferred ion		Taurocholic acid_simScore:89.4; N-Arachidonoyl taurine_simScore:90.6; N-Palmitoyl taurine_simScore:90.7; N-Stearoyl taurine_simScore:91.2; Guanidinoethyl sulfonate_simScore:93.3; Taurine_score:92.2				~same in all Rxes
128.058	C5 H8 N2 O2	12.816		200000	300000	400000	30	6.66667	15	1	2	1	0.25	0.74	0.49	0.651711	0.157104	0.36014	56	0	0			No matches found	No matches found	No matches found	No matches found	ddMS2 for preferred ion	C5 H8 N2 O2_ppm:-2.53_Ifit:81MatchedIso.:3			67032806_:1-(1-Hydroxy-2,5-dihydro-1H-imidazol-2-yl)ethanone_ppm:0_mzLogicScore:18; 67033235_:5-Methyl-2-oxo-4-imidazolidinecarbaldehyde_ppm:0_mzLogicScore:32; 67030393_:5-Ethyl-4H-imidazole 1,3-dioxide_ppm:0_mzLogicScore:14; 67039171_:1-(4,5-Dihydro-1,2,4-oxadiazol-3-yl)acetone_ppm:0_mzLogicScore:23; 67169111_:Tetrahydro-1H-imidazo[1,5-c][1,3]oxazol-3-one_ppm:0_mzLogicScore:29; 67163144_:2-Amino…		~same in all; one E+ rep up
129.042	C5 H7 N O3	9.533		100000	200000	70000	20	30	71.4286	2	0.6	0.3	0.98	-0.79	-1.77	0.43353	0.426652	0.124448	51	0	0			No matches found	No matches found	No matches found	No matches found	ddMS2 for preferred ion	C5 H7 N O3_ppm:-2.28_Ifit:96MatchedIso.:2			19343992_:3-Cyano-4-hydroxybutanoic acid_ppm:0_mzLogicScore:36; 15997844_:2,3-Dihydro-1,2-oxazol-5-ylacetic acid_ppm:0_mzLogicScore:29; 66000970_:3-Hydroxy-5-methylene-1,3-oxazinan-2-one_ppm:0_mzLogicScore:31; 67497021_:(2E)-2-Butenoyl carbamate_ppm:0_mzLogicScore:21; 67155286_:(2Z)-2-(Hydroxyimino)-3-oxopentanal_ppm:0_mzLogicScore:36; 67029578_:2-Nitro-3,4-dihydro-2H-pyran_ppm:0_mzLogicScore:29;…		~same in all Rxes
129.043	C5 H7 N O3	9.365		5000000	6000000	4000000	40	16.6667	50	1	0.9	0.7	0.2	-0.23	-0.43	0.897256	0.885993	0.661465	51	2	0	99.5		No matches found	No matches found	No matches found	No matches found	ddMS2 for preferred ion	C5 H7 N O3_ppm:-0.27_Ifit:45MatchedIso.:3	4-Oxoproline_score:99.5		19343992_:3-Cyano-4-hydroxybutanoic acid_ppm:0_mzLogicScore:26; 15997844_:2,3-Dihydro-1,2-oxazol-5-ylacetic acid_ppm:0_mzLogicScore:23; 66000970_:3-Hydroxy-5-methylene-1,3-oxazinan-2-one_ppm:0_mzLogicScore:22; 67497021_:(2E)-2-Butenoyl carbamate_ppm:0_mzLogicScore:18; 67155286_:(2Z)-2-(Hydroxyimino)-3-oxopentanal_ppm:0_mzLogicScore:23; 67029578_:2-Nitro-3,4-dihydro-2H-pyran_ppm:0_mzLogicScore:21;…		~same in all
129.079	C6 H11 N O2	9.455		30000	100000	600000	16.6667	30	8.33333	3	20	6	1.63	4.2	2.57	0.0366006	0.00231448	0.0091557	134	1	0			No matches found	No matches found	No matches found	No matches found	ddMS2 for preferred ion	C6 H11 N O2_ppm:-2.23_Ifit:79MatchedIso.:3	N,N-Diisopropylethylamine (DIPEA)_score:79.9		10524756_:(4,4-Dimethyl-4,5-dihydro-1,3-oxazol-2-yl)methanol_ppm:0_mzLogicScore:17; 468708_:3,5-Dihydroxy-3-methylpentanenitrile_ppm:0_mzLogicScore:23; 10617929_:aminoethyl methacrylate_ppm:0_mzLogicScore:19; 465755_:2-Methyl-5-nitro-2-pentene_ppm:0_mzLogicScore:14; 13684518_:Ethyl (2Z)-2-amino-2-butenoate_ppm:0_mzLogicScore:14; 486063_:3-(1-Hydroxyethyl)-2-pyrrolidinone_ppm:0_mzLogicScore:25; 18…		Multiple peaks, one highest in E+, but still present in C and E-
129.949	C H3 Cl O3 S	6.594		20000	30000	80000	100	1.33333	37.5	1	4	3	0.44	1.95	1.52	0.682344	0.120862	0.254204	2	0	0			No matches found	No matches found	No matches found	No matches found	No MS2	C H3 Cl O3 S_ppm:-0.32_Ifit:77MatchedIso.:2			163247_:Chloromethanesulfonic acid_ppm:0_mzLogicScore:NA; 63132_:methyl chlorosulphate_ppm:0_mzLogicScore:NA		Highest in E+
130.027	C5 H6 O4	6.817		100000	600000	300000	10	16.6667	30	4	2	0.4	2.13	0.83	-1.31	0.0198689	0.220862	0.0678238	33	0	0			No matches found	No matches found	No matches found	No matches found	ddMS2 for preferred ion	C5 H6 O4_ppm:-0.27_Ifit:93MatchedIso.:2			67024241_:2-(Trioxidanylmethyl)furan_ppm:0_mzLogicScore:NA; 66425231_:1-(3-Dioxiranyl)-1,3-butanedione_ppm:0_mzLogicScore:NA; 67491760_:1,4-Dioxepane-5,7-dione_ppm:0_mzLogicScore:NA; 5323414_:(2R)-2-Methylsuccinate_ppm:0_mzLogicScore:NA; 60820624_:5-Hydroxy-2,3-dioxopentanal_ppm:0_mzLogicScore:NA; 5323412_:(S)-2-methylsuccinate_ppm:0_mzLogicScore:NA; 24192258_:2-Hydroxy-3,4-dioxopentanal_ppm:0_mz…		Highest in E-, maybe also in E+ and C
130.027	C5 H6 O4	9.523		300000	300000	50000	16.6667	26.6667	80	0.7	0.1	0.2	-0.42	-2.76	-2.35	0.819133	0.0508974	0.0766901	33	9	0			No matches found	No matches found	No matches found	No matches found	ddMS2 for preferred ion	C5 H6 O4_ppm:-0.03_Ifit:93MatchedIso.:2	Microcystin LF_simScore:81.3; AB-FUBINACA metabolite 2B_simScore:83.7; N-Acetyl-1-aspartylglutamic acid_simScore:84.4; Microcystin LY_simScore:85.5; Microcystin RR_simScore:85.8; Nodularin_simScore:86.1; Microcystin-YR_simScore:86.7; Microcystin LA_simScore:87.3; 4-Oxoproline_score:99.5		67024241_:2-(Trioxidanylmethyl)furan_ppm:0_mzLogicScore:15; 66425231_:1-(3-Dioxiranyl)-1,3-butanedione_ppm:0_mzLogicScore:21; 67491760_:1,4-Dioxepane-5,7-dione_ppm:0_mzLogicScore:18; 5323414_:(2R)-2-Methylsuccinate_ppm:0_mzLogicScore:22; 60820624_:5-Hydroxy-2,3-dioxopentanal_ppm:0_mzLogicScore:21; 5323412_:(S)-2-methylsuccinate_ppm:0_mzLogicScore:22; 24192258_:2-Hydroxy-3,4-dioxopentanal_ppm:0_mz…		~same in all Rxes
130.027	C5 H6 O4	7.014		500000	1000000	200000	4	20	20	2	0.4	0.2	1.01	-1.33	-2.34	0.0329604	0.0148269	0.00296684	33	0	0			No matches found	No matches found	No matches found	No matches found	ddMS2 for preferred ion	C5 H6 O4_ppm:0.02_Ifit:100MatchedIso.:1			67024241_:2-(Trioxidanylmethyl)furan_ppm:0_mzLogicScore:NA; 66425231_:1-(3-Dioxiranyl)-1,3-butanedione_ppm:0_mzLogicScore:NA; 67491760_:1,4-Dioxepane-5,7-dione_ppm:0_mzLogicScore:NA; 5323414_:(2R)-2-Methylsuccinate_ppm:0_mzLogicScore:NA; 60820624_:5-Hydroxy-2,3-dioxopentanal_ppm:0_mzLogicScore:NA; 5323412_:(S)-2-methylsuccinate_ppm:0_mzLogicScore:NA; 24192258_:2-Hydroxy-3,4-dioxopentanal_ppm:0_mz…		present in all comparably, very messy trace
130.063	C6 H10 O3	3.557		4000000	5000000	30000000	50	6	13.3333	1	6	5	0.23	2.59	2.36	0.731214	0.00954713	0.013059	142	0	0			No matches found	No matches found	No matches found	No matches found	ddMS2 for preferred ion	C6 H10 O3_ppm:-0.15_Ifit:78MatchedIso.:4			472902_:3,8,9-Trioxabicyclo[4.2.1]nonane_ppm:0_mzLogicScore:11; 9128758_:4-Methyl-5-oxopentanoic acid_ppm:0_mzLogicScore:13; 233373_:2,6-Anhydro-1,5-dideoxyhex-5-enitol_ppm:0_mzLogicScore:13; 24785964_:2-Methylene-1,3,6-trioxocane_ppm:0_mzLogicScore:12; 465623_:6,8-Dioxabicyclo[3.2.1]octan-3-ol_ppm:0_mzLogicScore:12; 465670_:6,8-Dioxabicyclo[3.2.1]octan-4-ol_ppm:0_mzLogicScore:12; 4517445_:(E)-2-…		Highest in E+, but in all samples
130.11	C6 H14 N2 O	15.265		50000	30000	100000	40	20	90	0.5	2	4	-0.87	1.24	2.11	0.562466	0.448547	0.165535	54	1	0			No matches found	No matches found	No matches found	No matches found	ddMS2 for preferred ion	C6 H14 N2 O_ppm:-2.11_Ifit:94MatchedIso.:2	N,N-Diisopropylethylamine (DIPEA)_score:79.9		19985727_:N-Nitrosomethylisoamylamine_ppm:0_mzLogicScore:28; 67024236_:6-Nitroso-1-hexanamine_ppm:0_mzLogicScore:28; 67025688_:(3R,4S)-3-(Aminomethyl)-4-piperidinol_ppm:0_mzLogicScore:33; 66737794_:N-Methyl-5-nitroso-1-pentanamine_ppm:0_mzLogicScore:29; 67171750_:1-[(2R)-2-Butanyl]-3-methylurea_ppm:0_mzLogicScore:27; 11196352_:1-(2-Morpholinyl)ethanamine_ppm:0_mzLogicScore:33; 67159282_:N-(2-Nitr…		Highest in E+, looks weak but present in C and E-
131.04	C5 H9 N O S	2.756		10000	10000	500000	8	6	80	1	40	40	0.13	5.37	5.24	0.985176	0.0148894	0.0160008	29	3	0			No matches found	No matches found	No matches found	No matches found	ddMS2 for preferred ion	C5 H9 N O S_ppm:-2.22_Ifit:89MatchedIso.:3	2-[(3-Chlorobenzoyl)amino]-N-tetrahydrothiophen-3-ylbenzamide_simScore:61.5; Ethyl N-(1,4-thiazinan-4-ylcarbothioyl)carbamate_simScore:62.6; L-(-)-Methionine_simScore:68.3		67032690_:1-Sulfanyl-2-piperidinone_ppm:0_mzLogicScore:NA; 67028129_:(1E)-N-Hydroxy-1-(2-methyl-2-thiiranyl)ethanimine_ppm:0_mzLogicScore:NA; 67028245_:(2E)-3-(Dimethylamino)-2-propenethioic O-acid_ppm:0_mzLogicScore:NA; 67027577_:(1E)-N-Hydroxy-1-(2-methyl-2-thiiranyl)ethanimine_ppm:0_mzLogicScore:NA; 67029972_:6-Hydroxy-2-piperidinethione_ppm:0_mzLogicScore:NA; 67024507_:(3aS,6aR)-Hexahydrothie…		Only in E+ (E- peak looks like noise)
131.047		9.957		40000	30000	50000	15	100	80	0.7	1	2	-0.59	0.24	0.83	0.721095	0.999747	0.732223	0	42	0			No matches found	No matches found	No matches found	No matches found	ddMS2 for preferred ion		3-Methoxy PCP_simScore:92.7; 3-(1-(Piperidin-1-yl)cyclohexyl)phenol_simScore:92.7; N-(3-Methyl-1-{[2-(2-thienylmethylene)hydrazino]carbonyl}butyl)-2-(3-thienyl)acetamide_simScore:92.8; Phencyclidine_simScore:92.9; AH 7959_simScore:93; Primaquine_simScore:94.7; L-Isoleucine_score:99.5; L-Norleucine_score:99.8; Isoleucine_score:99.8; Leucine_score:99.9				~same in all
131.058	C5 H9 N O3	7.542		2000000	700000	900000	1.5	14.2857	11.1111	0.4	0.6	1	-1.24	-0.79	0.45	0.017906	0.0611294	0.208269	74	10	0			No matches found	No matches found	No matches found	No matches found	ddMS2 for preferred ion	C5 H9 N O3_ppm:-1.59_Ifit:86MatchedIso.:2	4-Allyl-1,2-diphenyl-3,5-pyrazolidinedione_simScore:84.4; 1-(2-Chloro-6-fluorobenzyl)-1,2,3,4-tetrahydro-2λ6,1-benzothiazine-2,2,4-trione_simScore:84.4; N-Benzyl-5-methoxy-1H-indole-2-carboxamide_simScore:84.4; N-Cyclohexyl-2-(2-furylmethyl)-3-oxo-1-isoindolinecarboxamide_simScore:84.4; 3-(1,3-Benzodioxol-5-yl)-2-(benzoylamino)acrylic acid_simScore:84.4; DL-5-Methoxytryptophan_simScore:84.4; Phen…		11526456_:4-amino-4-oxo-pentanoate_ppm:0_mzLogicScore:27; 67039241_:2-Methyl-3-buten-2-yl nitrate_ppm:0_mzLogicScore:19; 67038736_:(2E)-2-(Hydroxyimino)propyl acetate_ppm:0_mzLogicScore:16; 16188812_:4,4-Dimethoxy-4,5-dihydro-1,3-oxazole_ppm:0_mzLogicScore:18; 66738560_:4-Hydroxy-3-(hydroxymethyl)-2-butenamide_ppm:0_mzLogicScore:22; 66001276_:5-Hydroxy-4,5-dimethyl-1,2-oxazolidin-3-one_ppm:0_mzLo…		~same in all Rxes
132.024	C5 H8 O2 S	10.149		20000000	20000000	5000000	2	4.5	60	0.8	0.2	0.3	-0.35	-2.16	-1.81	0.816206	0.0506804	0.0766414	27	44	0			No matches found	No matches found	No matches found	No matches found	ddMS2 for preferred ion	C5 H8 O2 S_ppm:-2.7_Ifit:71MatchedIso.:8	Methionine_simScore:60.2; L-(-)-Methionine_simScore:68.3; tert-Butyl N-[1-(aminocarbonyl)-3-methylbutyl]carbamate_simScore:93.1; Clomipramine_simScore:93.1; Imipramine_simScore:93.1; Lidocaine_simScore:93.2; Primaquine_simScore:94.7; 12-Benzyl-3-isobutyl-6,9-diisopropyl-5,8-dimethyldodecahydro-1H,3H-pyrrolo[1,2-q][1,4,7,10,13,17]oxapentaazacyclononadecine-1,4,7,10,13,17(14H)-hexone_simScore:95.1;…		67033281_:(3xi)-4,5-Dideoxy-2-thiopentos-2-ulooxirose_ppm:0_mzLogicScore:21; 67037639_:(Vinylsulfanyl)methyl acetate_ppm:0_mzLogicScore:18; 66424884_:2-Formylbutanethioic O-acid_ppm:0_mzLogicScore:24; 557937_:(6R)-6-Methyl-1,4-oxathian-2-one_ppm:0_mzLogicScore:21; 67159483_:(3Z)-4-(Sulfanyloxy)-3-penten-2-one_ppm:0_mzLogicScore:24; 67034706_:5-Sulfanyltetrahydro-2H-pyran-2-one_ppm:0_mzLogicScore:…		Highest in C, lowest in E+
132.042	C5 H8 O4	11.32		300000	200000	600000	100	0.15	83.3333	0.8	2	3	-0.36	1.29	1.65	0.936103	0.522068	0.694143	44	2	0	73.9		No matches found	No matches found	No matches found	No matches found	ddMS2 for preferred ion	C5 H8 O4_ppm:-1.57_Ifit:85MatchedIso.:2	Methylsuccinic acid_score:63.7; Ethylmalonic acid_score:76.7		67498581_:4,4-Dihydroxy-2,3-pentanedione_ppm:0_mzLogicScore:10; 67028211_:3-(2-Oxoethoxy)propanoic acid_ppm:0_mzLogicScore:8; 67030414_:3,3-Dihydroxytetrahydro-2H-pyran-2-one_ppm:0_mzLogicScore:10; 67030709_:Acetic (2R)-2-hydroxypropanoic anhydride_ppm:0_mzLogicScore:8; 60823083_:3,3-Dihydroxy-2,4-pentanedione_ppm:0_mzLogicScore:10; 33289523_:(3S,4R,5R)-3,4-Dihydroxy-5-methyldihydro-2(3H)-furanon…		up in E+
132.079	C6 H12 O3	4.756		2000000	800000	1000000	20	12.5	70	0.5	0.8	2	-0.87	-0.24	0.63	0.377706	0.829647	0.636361	124	70	0			No matches found	No matches found	No matches found	No matches found	ddMS2 for preferred ion	C6 H12 O3_ppm:-0.58_Ifit:91MatchedIso.:2	4-Allyl-1,2-diphenyl-3,5-pyrazolidinedione_simScore:84.4; 1-(2-Chloro-6-fluorobenzyl)-1,2,3,4-tetrahydro-2λ6,1-benzothiazine-2,2,4-trione_simScore:84.4; N-Benzyl-5-methoxy-1H-indole-2-carboxamide_simScore:84.4; N-Cyclohexyl-2-(2-furylmethyl)-3-oxo-1-isoindolinecarboxamide_simScore:84.4; 3-(1,3-Benzodioxol-5-yl)-2-(benzoylamino)acrylic acid_simScore:84.4; DL-5-Methoxytryptophan_simScore:84.4; Phen…		4450177_:(2R,5S,6R)-6-Methyltetrahydro-2H-pyran-2,5-diol_ppm:0_mzLogicScore:29; 477139_:2,6-Anhydro-1,5-dideoxyhexitol_ppm:0_mzLogicScore:29; 252954_:1-Hydroperoxycyclohexanol_ppm:0_mzLogicScore:29; 11488259_:4-methyl-5-hydroxyvaleric acid_ppm:0_mzLogicScore:36; 461296_:3-Hydroxypropyl propionate_ppm:0_mzLogicScore:23; 479144_:1,2,4-Cyclohexanetriol_ppm:0_mzLogicScore:31; 480221_:9-crown-3_ppm:0_…		~same in all
134.094	C6 H14 O3	2.734		7000000	700000	900000	42.8571	1.28571	11.1111	0.1	0.1	1	-3.32	-2.91	0.41	0.00542082	0.00796396	0.54885	35	15	0			No matches found	No matches found	No matches found	No matches found	ddMS2 for preferred ion	C6 H14 O3_ppm:-2.8_Ifit:74MatchedIso.:3	N,N'-Diphenylthiourea_simScore:64.3; 3-[(2-{[(3,5-Dichloro-2-hydroxyphenyl)methylene]amino}phenyl)sulfanyl]propanenitrile_simScore:70.9; 2-Phenyl-3,4-dihydro-2H-1,4-benzothiazin-3-one_simScore:72.1; Benzothiazole_simScore:72.1; N2-Phenyl-3-methylbenzo[b]thiophene-2-carbothioamide_simScore:72.6; 5-({[4-(2-Thienyl)-2-pyrimidinyl]sulfanyl}methyl)-2,1,3-benzoxadiazole_simScore:72.7; TCMTB_simScore:73…		67033161_:1-[(2-Methyl-2-propanyl)oxy]-1,1-ethanediol_ppm:0_mzLogicScore:9; 10609106_:2,2-Dimethyl-4-hydroxymethyldioxolane_ppm:0_mzLogicScore:9; 26326907_:(2R,3S,4R)-2,3,4-Hexanetriol_ppm:0_mzLogicScore:11; 34980661_:(2S,3S,4R)-2,3,4-Hexanetriol_ppm:0_mzLogicScore:11; 14401982_:3,4-Dimethoxy-1-butanol_ppm:0_mzLogicScore:9; 10722749_:1,3,4-Hexanetriol_ppm:0_mzLogicScore:11; 11351812_:2-(1-Ethoxye…		up in C
136.037	C4 H8 O5	10.838		100000	100000	200000	50	70	20	1	2	2	0.09	0.96	0.87	0.996443	0.376295	0.404652	5	4	0			No matches found	No matches found	No matches found	No matches found	ddMS2 for preferred ion	C4 H8 O5_ppm:-1.94_Ifit:74MatchedIso.:2	Tenofovir_simScore:66.3; 2-[2-(1,3-Benzodioxol-5-ylmethylene)hydrazino]-N-(3,4-dimethylphenyl)-2-oxoacetamide_simScore:73.4; trans-Zeatin_simScore:84.6; Adenosine_score:97.8		10466326_:2,3-Dihydroxy-2-(hydroxymethyl)propanoic acid_ppm:0_mzLogicScore:26; 2061231_:D-erythronic acid_ppm:0_mzLogicScore:34; 4573940_:L-threonic acid_ppm:0_mzLogicScore:34; 133224_:threonic acid_ppm:0_mzLogicScore:34; 388628_:THREONIC ACID, L-_ppm:0_mzLogicScore:34		Highest in E+, but only moderately so
136.038	C5 H4 N4 O	7.791		30000	10000	60000	33.3333	5	83.3333	0.5	2	4	-0.98	1.06	2.04	0.574087	0.647147	0.244701	64	44	0			No matches found	No matches found	No matches found	No matches found	ddMS2 for preferred ion	C5 H12 S2_ppm:0.9_Ifit:90MatchedIso.:2; C5 H4 N4 O_ppm:-2.55_Ifit:90MatchedIso.:2	Cordycepin_simScore:70.4; Deoxyadenosine diphosphate (dADP)_simScore:73.5; S-Adenosylmethionine_simScore:79.4; trans-Zeatin_simScore:84.6; Adenosine triphosphate (ATP)_simScore:84.8; 2'-Deoxyadenosine_simScore:85.2; Deoxyadenosine 5'-triphosphate (dATP)_simScore:85.3; Cyclic ADP-ribose_simScore:85.3; Nicotinamide adenine dinucleotide phosphate (NADP+)_simScore:85.3; 2'-O-Methyladenosine_simScore:…		19292811_:2,4-Pentanedithiol_ppm:0_mzLogicScore:8; 67175942_:[1,2,4]Triazolo[1,5-a]pyrimidin-1-ium-6-olate_ppm:0_mzLogicScore:19; 67172011_:[1,2,4]Triazolo[4,3-a]pyrimidin-5(3H)-one_ppm:0_mzLogicScore:20; 67498029_:1H-[1,2,3]Triazolo[4,5-b]pyridine 2-oxide_ppm:0_mzLogicScore:23; 67164957_:4-Amino-2-oxo-1(2H)-pyrimidinecarbonitrile_ppm:0_mzLogicScore:17; 67028797_:(1,3,5-Triazin-2-yloxy)acetonitri…		~same in all Rxes; up in one E+ rep
136.052	C8 H8 O2	8.713		100000	50000	20000	20	20	40	0.6	0.2	0.3	-0.86	-2.56	-1.7	0.315246	0.0249498	0.0709341	81	88	0			No matches found	No matches found	No matches found	No matches found	ddMS2 for preferred ion	C8 H8 O2_ppm:-2.01_Ifit:84MatchedIso.:2	Deoxyadenosine diphosphate (dADP)_simScore:73.5; 5'-S-Methyl-5'-thioadenosine_simScore:74; Zeatin-7-N-glucoside_simScore:78.3; Adenosine 5'-monophosphate_simScore:84.3; trans-Zeatin_simScore:84.6; Adenosine triphosphate (ATP)_simScore:84.8; 2'-Deoxyadenosine_simScore:85.2; Deoxyadenosine 5'-triphosphate (dATP)_simScore:85.3; Cyclic ADP-ribose_simScore:85.3; Nicotinamide adenine dinucleotide phosp…		67033074_:Methyl 4,6-heptadiynoate_ppm:0_mzLogicScore:12; 67036855_:Bicyclo[4.1.0]hepta-2,4-diene-1-carboxylic acid_ppm:0_mzLogicScore:13; 15438716_:3-Methyl-3H-1,2-benzodioxole_ppm:0_mzLogicScore:15; 67170754_:4H,5H-Pyrano[4,3-b]pyran_ppm:0_mzLogicScore:16; 67493970_:Bicyclo[2.2.2]oct-4-ene-2,3-dione_ppm:0_mzLogicScore:14; 67177315_:3,10-Dioxatricyclo[5.2.1.0~1,5~]deca-5,8-diene_ppm:0_mzLogicSco…		~same in all Rxes. Super messy
136.052	C8 H8 O2	3.751		7000000	10000000	6000000	10	6	16.6667	1	0.8	0.6	0.47	-0.25	-0.73	0.231006	0.520027	0.0869547	81	1	0			No matches found	No matches found	No matches found	No matches found	ddMS2 for preferred ion	C8 H8 O2_ppm:-0.16_Ifit:67MatchedIso.:4	N4-(2,1,3-Benzoxadiazol-5-yl)morpholine-4-carboxamide_simScore:78.5		67033074_:Methyl 4,6-heptadiynoate_ppm:0_mzLogicScore:51; 67036855_:Bicyclo[4.1.0]hepta-2,4-diene-1-carboxylic acid_ppm:0_mzLogicScore:43; 15438716_:3-Methyl-3H-1,2-benzodioxole_ppm:0_mzLogicScore:45; 67170754_:4H,5H-Pyrano[4,3-b]pyran_ppm:0_mzLogicScore:47; 67493970_:Bicyclo[2.2.2]oct-4-ene-2,3-dione_ppm:0_mzLogicScore:48; 67177315_:3,10-Dioxatricyclo[5.2.1.0~1,5~]deca-5,8-diene_ppm:0_mzLogicSco…		~same in all Rxes
136.085	C4 H12 N2 O3	8.981		3000	10000	90000	3.33333	40	88.8889	5	30	7	2.24	5.03	2.79	0.220785	0.0406626	0.192148	1	24	0			No matches found	No matches found	No matches found	No matches found	ddMS2 for preferred ion	C4 H12 N2 O3_ppm:1.7_Ifit:100MatchedIso.:1	Trimethoprim impurity B_simScore:97.5; Inosine-5'-monophosphate (IMP)_simScore:98.4; 2',3'-Dideoxyinosine_simScore:98.4; 4-Amino-N'-hydroxypyrimidine-5-carboximidamide_simScore:98.6; 2'-Deoxyinosine_score:78; Inosine_score:99.6; Allopurinol_score:99.7; Hypoxanthine_score:99.9		67175904_:2,2-Bis[(hydroxymethyl)amino]ethanol_ppm:0_mzLogicScore:23		Only in E+, maybe in one E- sample - messy
136.088		8.98		2000	10000	100000	50	20	100	6	40	7	2.63	5.39	2.76	0.293448	0.0983148	0.476053	0	48	0			No matches found	No matches found	No matches found	No matches found	ddMS2 for preferred ion		Trimethoprim impurity B_simScore:97.5; Inosine-5'-monophosphate (IMP)_simScore:98.4; 2',3'-Dideoxyinosine_simScore:98.4; 4-Amino-N'-hydroxypyrimidine-5-carboximidamide_simScore:98.6; 2'-Deoxyinosine_score:78; Inosine_score:99.6; Allopurinol_score:99.7; Hypoxanthine_score:99.9				Present in E+, one E- sample; absent in C
136.952		9.596		9000000	10000000	6000000	11.1111	30	5	1	0.7	0.6	0.37	-0.49	-0.85	0.435353	0.284634	0.0891041	0	3	0			No matches found	No matches found	No matches found	No matches found	ddMS2 for preferred ion		2-[2-(1,3-Benzodioxol-5-ylmethylene)hydrazino]-N-(3,4-dimethylphenyl)-2-oxoacetamide_simScore:73.4				~same in all Rxes
137.047	C7 H7 N O2	10.169		500000	200000	300000	100	100	66.6667	0.5	0.5	1	-1.1	-0.91	0.19	0.823697	0.876897	0.992883	100	8	0			No matches found	No matches found	No matches found	No matches found	ddMS2 for preferred ion	C7 H7 N O2_ppm:-2.29_Ifit:92MatchedIso.:2	Trimethoprim impurity B_simScore:97.5; Inosine-5'-monophosphate (IMP)_simScore:98.4; 2',3'-Dideoxyinosine_simScore:98.4; 4-Amino-N'-hydroxypyrimidine-5-carboximidamide_simScore:98.6; 2'-Deoxyinosine_score:78; Inosine_score:99.6; Allopurinol_score:99.7; Hypoxanthine_score:99.9		67033340_:3-(Iminomethyl)-1,2-benzenediol_ppm:0_mzLogicScore:9; 65792603_:3-[(1E)-1-Propen-1-yl]-1H-pyrrole-2,5-dione_ppm:0_mzLogicScore:34; 67174386_:6,7-Dihydro-1,2-benzoxazol-3(2H)-one_ppm:0_mzLogicScore:28; 67170751_:5-[(E)-(Hydroxyimino)methyl]-3-methylene-1,4-cyclopentadien-1-ol_ppm:0_mzLogicScore:18; 67156949_:(6-Amino-5-hydroxy-2,4-cyclohexadien-1-ylidene)methanone_ppm:0_mzLogicScore:22; …		~same in all; reps don't agree well
137.912		22.129		3000000	3000000	2000000	13.3333	10	5	0.9	0.5	0.5	-0.23	-1.1	-0.87	0.341733	0.00765141	0.0147187	0	0	0			No matches found	No matches found	No matches found	No matches found	ddMS2 for preferred ion						In all samples, highest in C > E- > E+
137.95		9.579		700000	800000	500000	14.2857	12.5	0.2	1	0.8	0.6	0.36	-0.32	-0.69	0.209834	0.273957	0.0501025	1	0	0			No matches found	No matches found	No matches found	No matches found	ddMS2 for preferred ion				97271_:Methylstannane_ppm:-0.001_mzLogicScore:NA		~same in all Rxes
138.032	C7 H6 O3	3.783		2000000	2000000	1000000	40	10	30	1	0.8	0.8	0.08	-0.24	-0.32	0.93993	0.943093	0.79649	37	0	0			No matches found	No matches found	No matches found	No matches found	ddMS2 for preferred ion	C7 H6 O3_ppm:-0.74_Ifit:88MatchedIso.:2			67152721_:1,6-Heptadiene-3,4,5-trione_ppm:0_mzLogicScore:NA; 67173161_:2,3-Dihydro-4H-furo[3,2-c]pyran-4-one_ppm:0_mzLogicScore:NA; 67171978_:7,7a-Dihydro-5H-furo[3,4-b]pyran-5-one_ppm:0_mzLogicScore:NA; 67156131_:4-Methyl-6-oxabicyclo[3.1.1]hepta-1,3,5(7)-triene-2,7-diol_ppm:0_mzLogicScore:NA; 67160395_:(2Z)-(4-Oxo-2-cyclopenten-1-ylidene)acetic acid_ppm:0_mzLogicScore:NA; 58828398_:DESOXYPHYLLO…		~same in all
138.032	C7 H6 O3	7.983		300000	200000	400000	16.6667	4.5	25	0.7	1	2	-0.42	0.43	0.85	0.40197	0.407556	0.112108	37	1	0	51.7		No matches found	No matches found	No matches found	No matches found	ddMS2 for preferred ion	C7 H6 O3_ppm:-0.61_Ifit:93MatchedIso.:2	Salicylic acid_score:51.7		67152721_:1,6-Heptadiene-3,4,5-trione_ppm:0_mzLogicScore:17; 67173161_:2,3-Dihydro-4H-furo[3,2-c]pyran-4-one_ppm:0_mzLogicScore:23; 67171978_:7,7a-Dihydro-5H-furo[3,4-b]pyran-5-one_ppm:0_mzLogicScore:24; 67156131_:4-Methyl-6-oxabicyclo[3.1.1]hepta-1,3,5(7)-triene-2,7-diol_ppm:0_mzLogicScore:21; 67160395_:(2Z)-(4-Oxo-2-cyclopenten-1-ylidene)acetic acid_ppm:0_mzLogicScore:19; 58828398_:DESOXYPHYLLO…		Highest in E+, present in all 3
138.043	C6 H6 N2 O2	9.489		500000	500000	700000	20	2	14.2857	1	1	2	-0.04	0.56	0.6	0.998913	0.261052	0.250959	84	2	0	50.1		No matches found	No matches found	No matches found	No matches found	ddMS2 for preferred ion	C6 H6 N2 O2_ppm:-2.44_Ifit:78MatchedIso.:4	4-Aminonicotinic acid_score:85.5; Urocanic acid_score:86.4		67027757_:5-(Diazomethyl)-4-methyl-3(2H)-furanone_ppm:0_mzLogicScore:19; 67027691_:3-(3-Oxo-3H-pyrazol-5-yl)propanal_ppm:0_mzLogicScore:21; 67027985_:1-Oxa-7,8-diazaspiro[4.4]nona-2,6-dien-4-one_ppm:0_mzLogicScore:16; 67030048_:4-(2-Oxopropyl)-3H-pyrazol-3-one_ppm:0_mzLogicScore:19; 67028962_:1-(6-Oxa-2,3-diazabicyclo[3.1.0]hexa-1,4-dien-4-yl)-1-propanone_ppm:0_mzLogicScore:18; 13273364_:1H-1,2-D…		Highest in E+, present in all 3
138.043	C6 H6 N2 O2	2.62		900000	700000	400000	44.4444	128.571	50	0.8	0.5	0.6	-0.38	-1.13	-0.75	0.663209	0.893905	0.890875	84	6	0			No matches found	No matches found	No matches found	No matches found	ddMS2 for preferred ion	C6 H6 N2 O2_ppm:-2.32_Ifit:95MatchedIso.:2	N'-Cyclohexylidenaminomethanehydrazonamide_simScore:71.7; Zolazepam_simScore:72.1; 1,3-Dimethyl-N-(3-morpholinopropyl)-4-nitro-1H-pyrazol-5-amine_simScore:74.9		67027757_:5-(Diazomethyl)-4-methyl-3(2H)-furanone_ppm:0_mzLogicScore:20; 67027691_:3-(3-Oxo-3H-pyrazol-5-yl)propanal_ppm:0_mzLogicScore:20; 67027985_:1-Oxa-7,8-diazaspiro[4.4]nona-2,6-dien-4-one_ppm:0_mzLogicScore:25; 67030048_:4-(2-Oxopropyl)-3H-pyrazol-3-one_ppm:0_mzLogicScore:22; 67028962_:1-(6-Oxa-2,3-diazabicyclo[3.1.0]hexa-1,4-dien-4-yl)-1-propanone_ppm:0_mzLogicScore:25; 13273364_:1H-1,2-D…		~same in all; absent in one E- sample
138.948		9.606		3000000	5000000	3000000	20	20	6.66667	1	0.7	0.5	0.47	-0.46	-0.94	0.332208	0.335077	0.0818608	0	0	0			No matches found	No matches found	No matches found	No matches found	ddMS2 for preferred ion						~same in all Rxes
139.949		22.084		600000	600000	400000	1.5	10	0.5	1	0.7	0.6	0.1	-0.62	-0.72	0.490653	0.00808431	0.00527609	0	17	0			No matches found	No matches found	No matches found	No matches found	ddMS2 for preferred ion		Ethyl 4-[2-(2,4-dinitrophenyl)hydrazono]piperidine-1-carboxylate_simScore:71.2; 2-Hydroxynicotinic acid_simScore:79.6; 6-Hydroxynicotinic acid_simScore:79.6; 5,5'-Dithiobis(2-nitrobenzoic acid)_simScore:79.6; 4-Nitrophenol_simScore:79.6; N1-(2-Furylmethyl)-2,4-dinitroaniline_simScore:79.6; 5-Hydroxynicotinic acid_simScore:79.6; 6-Hydroxypicolinic acid_simScore:96; 3-Hydroxypicolinic acid_simScore…				~same in all Rxes
140.058	C6 H8 N2 O2	9.472		400000	200000	400000	25	4	17.5	0.6	1	2	-0.69	-0.05	0.64	0.240733	0.995832	0.260035	82	1	0			No matches found	No matches found	No matches found	No matches found	ddMS2 for preferred ion	C6 H8 N2 O2_ppm:-2.61_Ifit:80MatchedIso.:3	N1-Benzyl-2-[(2-oxo-3-piperidyl)carbonyl]hydrazine-1-carbothioamide_simScore:62.7		67033926_:1-(2-Hydroxyethyl)-4(1H)-pyrimidinone_ppm:0_mzLogicScore:24; 67174140_:Tetrahydro-1H-pyrrolo[1,2-a]imidazole-2,3-dione_ppm:0_mzLogicScore:29; 67173358_:1,3,4,5-Tetrahydro-2,1,3-benzoxadiazole 1-oxide_ppm:0_mzLogicScore:19; 67493448_:3,6-Diazabicyclo[3.2.1]octane-2,4-dione_ppm:0_mzLogicScore:25; 67163568_:5-Acetyl-3,4-dihydro-2(1H)-pyrimidinone_ppm:0_mzLogicScore:29; 67155908_:4,5,6,7-Te…		~same in all Rxes; up in one E+ rep
140.983	C H4 N O5 P	22.136		1000000	1000000	600000	20	8	1.16667	1	0.6	0.6	-0.02	-0.77	-0.75	0.993394	0.0263688	0.0279136	2	0	0			No matches found	No matches found	No matches found	No matches found	ddMS2 for preferred ion	C H4 N O5 P_ppm:-0.62_Ifit:39MatchedIso.:3			67495066_:(Aminooxy)(hydroxy)phosphinecarboxylic acid oxide_ppm:0_mzLogicScore:NA; 272_:Carbamoylphosphate_ppm:0_mzLogicScore:NA		~same in all Rxes
141.054	C5 H7 N3 O2	9.715		200000	500000	300000	20	60	23.3333	3	2	0.6	1.45	0.6	-0.85	0.150515	0.557102	0.408498	61	0	0			No matches found	No matches found	No matches found	No matches found	ddMS2 for preferred ion	C5 H7 N3 O2_ppm:-0.18_Ifit:74MatchedIso.:2			67028488_:2-(1,3,5-Triazin-2-yloxy)ethanol_ppm:0_mzLogicScore:14; 13265160_:Amino(1H-imidazol-1-yl)acetic acid_ppm:0_mzLogicScore:28; 67153195_:6-Amino-1-(hydroxymethyl)-2(1H)-pyrimidinone_ppm:0_mzLogicScore:26; 67036508_:1H-Pyrazol-4-ylmethyl carbamate_ppm:0_mzLogicScore:19; 66738544_:1-(3-Cyano-2-oxopropyl)urea_ppm:0_mzLogicScore:32; 67173002_:4,4a,5,6-Tetrahydroimidazo[4,5-e][1,2]oxazin-3(2H)-…		~same in all
141.927	C H3 Br O3	9.499		100000	80000	80000	6	12.5	0.25	0.6	0.6	1	-0.72	-0.75	-0.03	0.0175334	0.0160881	0.980003	1	0	0			No matches found	No matches found	No matches found	No matches found	ddMS2 for preferred ion	C H3 Br O3_ppm:-0.17_Ifit:93MatchedIso.:2			11221029_:Methyl bromate_ppm:0_mzLogicScore:NA		~same in all
141.985		21.81		5000000	5000000	4000000	12	0.14	7.5	1	0.7	0.7	0.12	-0.42	-0.54	0.636864	0.0907175	0.0472789	7	0	0			No matches found	No matches found	No matches found	No matches found	ddMS2 for preferred ion				10467379_:S-Ethyl dihydrogen phosphorothioate_ppm:0_mzLogicScore:5; 10143907_:O-Ethyl dihydrogen phosphorothioate_ppm:0_mzLogicScore:10; 4954347_:O,S-Dimethyl hydrogen phosphorothioate_ppm:0_mzLogicScore:5; 268347_:RA8449000_ppm:0_mzLogicScore:5; 147078_:DIMETHYL THIOPHOSPHATE_ppm:0_mzLogicScore:5; 74370_:2-Propanesulfonyl chloride_ppm:0_mzLogicScore:10; 59658_:1-Propanesulfonyl chloride_ppm:0_mz…		~same in all Rxes
142.074	C6 H10 N2 O2	9.85		400000	900000	2000000	17.5	4.44444	40	3	7	3	1.37	2.74	1.37	0.0460619	0.00712136	0.0512269	59	0	0			No matches found	No matches found	No matches found	No matches found	ddMS2 for preferred ion	C6 H10 N2 O2_ppm:-3.06_Ifit:83MatchedIso.:3			67028386_:2-(2-Oxiranyl)-3,4-dihydro-1(2H)-pyrimidinol_ppm:0_mzLogicScore:NA; 67152841_:(1E)-N,N-Dimethyl-1-nitro-1,3-butadien-1-amine_ppm:0_mzLogicScore:NA; 67153330_:(1Z)-N,N-Dimethyl-1-nitro-1,3-butadien-1-amine_ppm:0_mzLogicScore:NA; 67153447_:1,2-Dihydroxy-2-piperidinecarbonitrile_ppm:0_mzLogicScore:NA; 14776727_:1-Acetamido-2-pyrrolidinone_ppm:0_mzLogicScore:NA; 67177675_:2-Nitro-2-azabicyc…		Hugely abundant in E+, present in E-, absent in C (peak is shifted)
142.074	C6 H10 N2 O2	10.448		700000	700000	400000	1.14286	4.28571	50	1	0.6	0.6	0.04	-0.63	-0.67	0.994105	0.279972	0.255254	59	1	0			No matches found	No matches found	No matches found	No matches found	ddMS2 for preferred ion	C6 H10 N2 O2_ppm:-2.06_Ifit:77MatchedIso.:2	Ethyl 4-[(2-oxopiperidino)methyl]tetrahydropyrazine-1(2H)-carboxylate_simScore:81.9		67028386_:2-(2-Oxiranyl)-3,4-dihydro-1(2H)-pyrimidinol_ppm:0_mzLogicScore:16; 67152841_:(1E)-N,N-Dimethyl-1-nitro-1,3-butadien-1-amine_ppm:0_mzLogicScore:18; 67153330_:(1Z)-N,N-Dimethyl-1-nitro-1,3-butadien-1-amine_ppm:0_mzLogicScore:18; 67153447_:1,2-Dihydroxy-2-piperidinecarbonitrile_ppm:0_mzLogicScore:25; 14776727_:1-Acetamido-2-pyrrolidinone_ppm:0_mzLogicScore:19; 67177675_:2-Nitro-2-azabicyc…		~same in all Rxes
142.136	C9 H18 O	2.684		100000000	10000000	2000000	50	7	100	0.1	0.02	0.2	-3.04	-5.74	-2.7	0.127353	0.0201647	0.11163	124	0	0			No matches found	No matches found	No matches found	No matches found	ddMS2 for preferred ion	C9 H18 O_ppm:-1.04_Ifit:41MatchedIso.:3			4515878_:(5Z)-5-Methyl-5-octen-1-ol_ppm:0_mzLogicScore:NA; 4516624_:5-octen-2-ol, 5-methyl-_ppm:0_mzLogicScore:NA; 478481_:2-Ethyl-4,6-dimethyltetrahydropyran_ppm:0_mzLogicScore:NA; 484399_:5-Isopropyl-2,2-dimethyltetrahydrofuran_ppm:0_mzLogicScore:NA; 461302_:3-Butyl-3-ethyloxetane_ppm:0_mzLogicScore:NA; 474908_:2,2,5-Trimethylhexan-4-one_ppm:0_mzLogicScore:NA; 461241_:3,3-Dipropyloxetane_ppm:0_…		Highest in C, present in all 3
143.058	C6 H9 N O3	6.74		20000	90000	300000	10	4.44444	1.66667	4	20	4	1.93	3.96	2.02	0.00028609	1e-15	0.000233997	59	2	0			No matches found	No matches found	No matches found	No matches found	ddMS2 for preferred ion	C6 H9 N O3_ppm:-0.87_Ifit:84MatchedIso.:2	3-(1H-Imidazol-4-yl)-2-(2-thienylsulfonyl)acrylonitrile_simScore:60.4; 6-Amino-3-methyl-1-phenyl-1H-pyrazolo[3,4-b]pyridine-5-carboxamide_simScore:64.1		67032803_:2-(Nitromethyl)cyclopentanone_ppm:0_mzLogicScore:11; 67028485_:4-Methyl-5-nitro-3,6-dihydro-2H-pyran_ppm:0_mzLogicScore:13; 67029282_:4-Methyl-3-nitro-3,6-dihydro-2H-pyran_ppm:0_mzLogicScore:14; 67036753_:(2E)-2-(Ethylimino)-3-oxobutanoic acid_ppm:0_mzLogicScore:16; 67176685_:2-Hydroxy-2-azabicyclo[3.1.0]hexane-1-carboxylic acid_ppm:0_mzLogicScore:12; 10609034_:4-Oxo-1-piperidinecarboxy…		In E+, maybe a bit in E- but not present in C
143.094	C7 H13 N O2	9.187		30000	60000	200000	6.66667	50	50	2	5	3	0.87	2.28	1.41	0.691166	0.231915	0.506388	132	2	0	85.3		No matches found	No matches found	No matches found	No matches found	ddMS2 for preferred ion	C7 H13 N O2_ppm:-1.76_Ifit:98MatchedIso.:2	1-Aminocyclohexanecarboxylic acid_score:85.2; DL-Stachydrine_score:85.3		4520351_:(2E)-4-Amino-5-methyl-2-hexenoic acid_ppm:0_mzLogicScore:NA; 474013_:7-Methoxy-8-oxa-1-azabicyclo(5.1.0)octane_ppm:0_mzLogicScore:NA; 4518209_:N-[(3E)-2-Hydroxy-3-penten-1-yl]acetamide_ppm:0_mzLogicScore:NA; 21240345_:1,1-Dimethyl-2-pyrrolidiniumcarboxylate_ppm:0_mzLogicScore:NA; 115001_:8-Azabicyclo[3.2.1]octane-2,7-diol_ppm:0_mzLogicScore:NA; 4521277_:Ethyl (2E)-4-amino-2-pentenoate_pp…		~same in all; up in one E+ rep
143.105	C6 H13 N3 O	8.02		80000	100000	20000	87.5	90	10	1	0.3	0.2	0.58	-1.9	-2.48	0.82563	0.475623	0.27491	14	0	0			No matches found	No matches found	No matches found	No matches found	ddMS2 for preferred ion	C6 H13 N3 O_ppm:-3.06_Ifit:69MatchedIso.:2			7875813_:(2E)-2-Pentylidenehydrazinecarboxamide_ppm:0_mzLogicScore:21; 28562210_:1-(1-Pyrrolidinylmethyl)urea_ppm:0_mzLogicScore:21; 7875801_:(2E)-2-(3-Methylbutylidene)hydrazinecarboxamide_ppm:0_mzLogicScore:18; 479845_:N,N,3,3-Tetramethyl-1-diaziridinecarboxamide_ppm:0_mzLogicScore:17; 7833695_:(2E)-2-(2,2-Dimethylpropylidene)hydrazinecarboxamide_ppm:0_mzLogicScore:14; 310766_:1-(1-Piperidinyl)…		~same in all Rxes - big mess
143.92		22.027		3000000	3000000	2000000	10	3.33333	10	1	0.7	0.7	0	-0.55	-0.56	0.999687	0.0477624	0.0470725	2	7	0			No matches found	No matches found	No matches found	No matches found	ddMS2 for preferred ion		Probenecid_simScore:60.6; 5-Methoxy EPT_simScore:61.2; Amiodarone_simScore:62.3; N,N-Diethyl-N'-methylethylene-diamine_simScore:62.9; N1,N1-Dipropyl-4-(hydrazinocarbonyl)benzene-1-sulfonamide_simScore:63.4; Clomiphene_simScore:66.1; N,N-Diethylethanolamine_score:84.2		123046_:Dichloroethanethioic S-acid_ppm:0.001_mzLogicScore:11; 140610_:Oxidosulfanesulfonatato(3-) oxide_ppm:0_mzLogicScore:0		~same in all Rxes
144.042	C6 H8 O4	12.504		2000000	2000000	1000000	25	5	20	0.7	0.5	0.7	-0.44	-0.96	-0.52	0.28964	0.0500193	0.198443	87	18	0			No matches found	No matches found	No matches found	No matches found	ddMS2 for preferred ion	C6 H8 O4_ppm:-2.13_Ifit:73MatchedIso.:3	Milbemectin A3_simScore:79.4; 2-Ethylhexanoic acid_score:72.8; Caprylic acid_score:72.8		67152825_:3,5-Dihydroxy-6-methyl-3,4-dihydro-2H-pyran-2-one_ppm:0_mzLogicScore:29; 34559465_:1,2:3,4-cis-dianhydroinositol_ppm:0_mzLogicScore:24; 67496451_:(1E)-1-Propen-1-ylmalonic acid_ppm:0_mzLogicScore:20; 67159953_:(3-Hydroxy-2-oxopropyl)malonaldehyde_ppm:0_mzLogicScore:24; 67154891_:5,5-Dihydroxy-3,4-dimethyl-2(5H)-furanone_ppm:0_mzLogicScore:21; 67166858_:(2S)-2-(Hydroxymethyl)-2-oxiranyl …		~same in all Rxes
144.042	C6 H8 O4	11.291		50000	100000	300000	40	30	66.6667	3	6	2	1.35	2.63	1.28	0.269827	0.0772587	0.383393	87	5	0			No matches found	No matches found	No matches found	No matches found	ddMS2 for preferred ion	C6 H8 O4_ppm:-2.08_Ifit:85MatchedIso.:2	21-Amino-3,20-dihydroxy-2-docosanyl hexopyranoside_simScore:63.7; 3-Hydroxy-3,5,5-trimethyl-4-(3-oxo-1-buten-1-ylidene)cyclohexyl β-D-glucopyranoside_simScore:92.4; (R)-Prunasin_simScore:96.4; Amygdalin_simScore:96.9; D(-)-Amygdalin_simScore:97.6		67152825_:3,5-Dihydroxy-6-methyl-3,4-dihydro-2H-pyran-2-one_ppm:0_mzLogicScore:22; 34559465_:1,2:3,4-cis-dianhydroinositol_ppm:0_mzLogicScore:17; 67496451_:(1E)-1-Propen-1-ylmalonic acid_ppm:0_mzLogicScore:15; 67159953_:(3-Hydroxy-2-oxopropyl)malonaldehyde_ppm:0_mzLogicScore:17; 67154891_:5,5-Dihydroxy-3,4-dimethyl-2(5H)-furanone_ppm:0_mzLogicScore:16; 67166858_:(2S)-2-(Hydroxymethyl)-2-oxiranyl …		Highest in E+, present in all
145.074	C6 H11 N O3	6.879		2000000	800000	900000	15	7.5	11.1111	0.5	0.5	1	-1.03	-1	0.03	0.019175	0.0209146	0.981698	95	2	0			No matches found	No matches found	No matches found	No matches found	ddMS2 for preferred ion	C6 H11 N O3_ppm:-1.43_Ifit:95MatchedIso.:2	Sulfaquinoxaline_simScore:67.1; 1,3-Diiminoisoindoline_simScore:82.9		67024202_:(2E)-5-Amino-4-hydroxy-3-methyl-2-pentenoic acid_ppm:0_mzLogicScore:18; 66738918_:(2S)-4-Hydroxy-2-piperidinecarboxylic acid_ppm:0_mzLogicScore:23; 66424273_:3-Hydroxy-4-methyl-L-proline_ppm:0_mzLogicScore:20; 14030933_:N-(Tetrahydro-2-furanyl)glycine_ppm:0_mzLogicScore:17; 67497327_:N-Oxo-L-norleucine_ppm:0_mzLogicScore:20; 67177905_:Methyl N-oxo-L-norvalinate_ppm:0_mzLogicScore:18; 67…		up in C?
145.085	C5 H11 N3 O2	13.11		400000	400000	400000	1.5	7.5	50	0.9	0.9	1	-0.23	-0.09	0.13	0.783698	0.902506	0.965367	29	28	0			No matches found	No matches found	No matches found	No matches found	ddMS2 for preferred ion	C5 H11 N3 O2_ppm:-2.25_Ifit:67MatchedIso.:2	L-Glutathione (reduced)_simScore:91.3; Υ-Glutamylcysteine_simScore:94; 4-Acetamido-5-[2-(4-hydroxyphenyl)ethylamino]-5-oxopentanoic acid_simScore:95.2; L-Glutathione oxidized_simScore:96.9; N-Phenylacetylglutamine_simScore:97.2; D-(+)-Pyroglutamic Acid_score:93; L-Pyroglutamic acid_score:93.5; D-(-)-Glutamine_score:98.6; DL-Glutamine_score:99.7		67027907_:1,3-Dimethyl-1-(2-nitrosoethyl)urea_ppm:0_mzLogicScore:31; 19970002_:N-Nitroso-iso-butylurea_ppm:0_mzLogicScore:40; 19961055_:Nitrosodimethylethylurea_ppm:0_mzLogicScore:41; 13595499_:(2-Amino-1-imidazolidinyl)acetic acid_ppm:0_mzLogicScore:48; 66737606_:2-Acetyl-N,1-dimethylhydrazinecarboxamide_ppm:0_mzLogicScore:30; 67157588_:1-(Butyryloxy)guanidine_ppm:0_mzLogicScore:51; 67166724_:(2…		~same in all; one E+ rep up
145.146	C8 H19 N O	12.868		10000	70000	90000	60	2.85714	44.4444	5	6	1	2.3	2.59	0.29	0.0308472	0.0238172	0.877013	21	76	0			No matches found	No matches found	No matches found	No matches found	ddMS2 for preferred ion	C8 H19 N O_ppm:-2.28_Ifit:100MatchedIso.:1	L-Glutathione (reduced)_simScore:91.3; Υ-L-Glutamyl-L-glutamic acid_simScore:91.4; Υ-Glutamylcysteine_simScore:94; 4-Acetamido-5-[2-(4-hydroxyphenyl)ethylamino]-5-oxopentanoic acid_simScore:95.2; L-Glutathione oxidized_simScore:96.9; N-Phenylacetylglutamine_simScore:97.2; Acetylcholine_score:90.7; D-(+)-Pyroglutamic Acid_score:93; L-Pyroglutamic acid_score:93.5; D-(-)-Glutamine_score:98.6; DL-Glu…		67028826_:1-[Ethyl(2-methyl-2-propanyl)amino]ethanol_ppm:0_mzLogicScore:37; 67175150_:2-(Diisopropylammonio)ethanolate_ppm:0_mzLogicScore:37; 11189710_:Diisopropylethanolamine_ppm:0_mzLogicScore:51; 476298_:2-tert-Butoxy-N,N-dimethylethanamine_ppm:0_mzLogicScore:34; 476447_:N,N-Dimethyl-3-isopropoxypropylamine_ppm:0_mzLogicScore:34; 19971268_:Triethylaminoethanol_ppm:0_mzLogicScore:51; 466532_:N-…		Up in E+, E-; one E+ higher than rest
145.982		21.807		5000000	5000000	4000000	8	6	10	1	0.8	0.7	0.13	-0.31	-0.44	0.607787	0.177153	0.0796263	0	0	0			No matches found	No matches found	No matches found	No matches found	ddMS2 for preferred ion						~same in all Rxes
146.014	C5 H7 O3 P	12.955		100000	100000	30000	80	90	100	1	0.3	0.2	0.38	-1.7	-2.08	0.925972	0.400397	0.284502	1	56	0			No matches found	No matches found	No matches found	No matches found	ddMS2 for preferred ion	C5 H7 O3 P_ppm:4.26_Ifit:67MatchedIso.:2	L-Glutathione (reduced)_simScore:91.3; Υ-L-Glutamyl-L-glutamic acid_simScore:91.4; Υ-Glutamylcysteine_simScore:94; 4-Acetamido-5-[2-(4-hydroxyphenyl)ethylamino]-5-oxopentanoic acid_simScore:95.2; L-Glutathione oxidized_simScore:96.9; N-Phenylacetylglutamine_simScore:97.2; D-(+)-Pyroglutamic Acid_score:93; L-Pyroglutamic acid_score:93.5; D-(-)-Glutamine_score:98.6; DL-Glutamine_score:99.7		67032941_:1,2,4-Pentatrien-3-ylphosphonic acid_ppm:-0.001_mzLogicScore:17		~same in all, messy
146.015	C4 H6 N2 O2 S	11.608		200000	200000	300000	20	10	23.3333	1	2	2	0.27	0.85	0.59	0.634864	0.113313	0.25629	19	3	0			No matches found	No matches found	No matches found	No matches found	ddMS2 for preferred ion	C4 H6 N2 O2 S_ppm:-2.17_Ifit:64MatchedIso.:3	Acetylcholine_score:90.7		67030403_:4,5-Dihydro-1,2,3-thiadiazol-2-ium-2-ylacetate_ppm:0_mzLogicScore:18; 67496381_:4-Hydroxy-5-thioxotetrahydro-2(1H)-pyrimidinone_ppm:0_mzLogicScore:18; 67491097_:N-Cyano-L-cysteine_ppm:0_mzLogicScore:24; 67165227_:(2Z)-3-{[(E)-Hydrazonomethyl]sulfanyl}acrylic acid_ppm:0_mzLogicScore:18; 15401059_:1-(Methylsulfanyl)-2,4-imidazolidinedione_ppm:0_mzLogicScore:18; 32969944_:S-Cyano-L-cystein…		~same in all Rxes; up in one E+ rep
146.015	C4 H6 N2 O2 S	12.97		90000	200000	90000	77.7778	100	33.3333	3	1	0.4	1.36	-0.07	-1.43	0.418146	0.983907	0.487379	19	56	0			No matches found	No matches found	No matches found	No matches found	ddMS2 for preferred ion	C4 H6 N2 O2 S_ppm:-1.03_Ifit:54MatchedIso.:2	L-Glutathione (reduced)_simScore:91.3; Υ-Glutamylcysteine_simScore:94; 4-Acetamido-5-[2-(4-hydroxyphenyl)ethylamino]-5-oxopentanoic acid_simScore:95.2; L-Glutathione oxidized_simScore:96.9; N-Phenylacetylglutamine_simScore:97.2; D-(+)-Pyroglutamic Acid_score:93; L-Pyroglutamic acid_score:93.5; D-(-)-Glutamine_score:98.6; DL-Glutamine_score:99.7		67030403_:4,5-Dihydro-1,2,3-thiadiazol-2-ium-2-ylacetate_ppm:0_mzLogicScore:37; 67496381_:4-Hydroxy-5-thioxotetrahydro-2(1H)-pyrimidinone_ppm:0_mzLogicScore:35; 67491097_:N-Cyano-L-cysteine_ppm:0_mzLogicScore:52; 67165227_:(2Z)-3-{[(E)-Hydrazonomethyl]sulfanyl}acrylic acid_ppm:0_mzLogicScore:29; 15401059_:1-(Methylsulfanyl)-2,4-imidazolidinedione_ppm:0_mzLogicScore:35; 32969944_:S-Cyano-L-cystein…		~same in all; giant mess
146.99	C4 H6 N O P S	21.798		300000	300000	200000	6.66667	10	4	1	0.8	0.7	0.19	-0.34	-0.53	0.396598	0.134674	0.0464555	1	0	0			No matches found	No matches found	No matches found	No matches found	ddMS2 for preferred ion	C4 H6 N O P S_ppm:-1.79_Ifit:77MatchedIso.:2			178032_:5-(2-Chloroethyl)-1,3-thiazole_ppm:0_mzLogicScore:NA		~same in all Rxes
146.996		12.283		800000	1000000	1000000	3.75	5	30	1	1	0.9	0.48	0.3	-0.18	0.300377	0.615237	0.72238	0	1	0			No matches found	No matches found	No matches found	No matches found	ddMS2 for preferred ion		Diglycidyl ether_simScore:67.5				~same in all
147.089	C6 H13 N O3	10.631		1000000	1000000	300000	30	8	66.6667	1	0.2	0.2	0.07	-2.08	-2.16	0.992207	0.140337	0.127635	78	4	0			No matches found	No matches found	No matches found	No matches found	ddMS2 for preferred ion	C6 H13 N O3_ppm:-2.56_Ifit:79MatchedIso.:3	7-Methyladenine_score:98.3; N6-Methyladenine_score:98.3; 3-Methyladenine_score:98.6; 1-Methyladenine_score:98.6		66424393_:3-Amino-2,3,6-trideoxy-beta-L-arabino-hexopyranose_ppm:0_mzLogicScore:31; 66424717_:3-Amino-2,3,6-trideoxy-beta-L-ribo-hexopyranose_ppm:0_mzLogicScore:31; 21377618_:4-aminohex-5-ene-1,2,3-triol_ppm:0_mzLogicScore:31; 65569280_:5-Hydroxy-L-leucine_ppm:0_mzLogicScore:23; 60645104_:5-Amino-2,3,5-trideoxy-2-methylpentonic acid_ppm:0_mzLogicScore:23; 60645137_:5-Amino-2,3,5-trideoxy-3-methyl…		~same in all Rxes
147.089	C6 H13 N O3	9.578		6000000	6000000	5000000	50	66.6667	8	1	0.8	0.8	-0.07	-0.4	-0.33	0.983276	0.905259	0.964729	78	8	0			No matches found	No matches found	No matches found	No matches found	ddMS2 for preferred ion	C6 H13 N O3_ppm:-2.53_Ifit:68MatchedIso.:5	1H-Benzotriazole-5-carboxylic acid_simScore:84.2; 2-{[5-Hydroxy-4-(3-pyridinyl)-4H-1,2,4-triazol-3-yl]sulfanyl}-N-phenylacetamide_simScore:84.2; 2-(1H-1,2,3-Benzotriazol-1-yl)-N'-(2-thienylmethylene)acetohydrazide_simScore:84.5; O1-[4-(Trifluoromethoxy)benzoyl]-2-(3-cyclopropyl-3H-imidazo[4,5-b]pyridin-2-yl)ethanehydroximamide_simScore:91.5; N-(4,6-Dimethyl-2-pyrimidinyl)-4-[(E)-(2-hydroxybenzyli…		66424393_:3-Amino-2,3,6-trideoxy-beta-L-arabino-hexopyranose_ppm:0_mzLogicScore:27; 66424717_:3-Amino-2,3,6-trideoxy-beta-L-ribo-hexopyranose_ppm:0_mzLogicScore:27; 21377618_:4-aminohex-5-ene-1,2,3-triol_ppm:0_mzLogicScore:29; 65569280_:5-Hydroxy-L-leucine_ppm:0_mzLogicScore:29; 60645104_:5-Amino-2,3,5-trideoxy-2-methylpentonic acid_ppm:0_mzLogicScore:29; 60645137_:5-Amino-2,3,5-trideoxy-3-methyl…		~same in all; reps don't agree well
149.07	C6 H7 N5	9.853		2000000	800000	5000000	20	37.5	40	0.3	2	6	-1.61	1.07	2.67	0.0770939	0.222714	0.0218284	27	4	0	98.6		No matches found	No matches found	No matches found	No matches found	ddMS2 for preferred ion	C6 H7 N5_ppm:-2.75_Ifit:68MatchedIso.:5	7-Methyladenine_score:98.3; N6-Methyladenine_score:98.3; 3-Methyladenine_score:98.6; 1-Methyladenine_score:98.6		67153840_:1H-Pyrrolo[3,2-d]pyrimidine-2,4-diamine_ppm:0_mzLogicScore:48; 15212066_:3-Azido-1,2-benzenediamine_ppm:0_mzLogicScore:14; 67163190_:1,3-Dimethyl-1H-pyrazolo[4,3-e][1,2,4]triazine_ppm:0_mzLogicScore:18; 67166693_:4H-Pyrazolo[4,3-b]pyridine-3,5-diamine_ppm:0_mzLogicScore:31; 67168110_:4-Imino-2,4-dihydro-3H-pyrrolo[2,3-d]pyrimidin-3-amine_ppm:0_mzLogicScore:30; 67169465_:1H-Pyrazolo[3,4-…		Elevated in E+ but present in all, E+ >> C > E-
149.12	C10 H15 N	13.208		200000	10000	8000	150	2	5	0.05	0.04	0.8	-4.32	-4.65	-0.33	0.569635	0.501545	0.987999	99	15	0			No matches found	No matches found	No matches found	No matches found	ddMS2 for preferred ion	C10 H15 N_ppm:-2.32_Ifit:99MatchedIso.:2	Disperse Yellow 3_simScore:89.9; 7-Methyladenine_score:98.3; N6-Methyladenine_score:98.3; 3-Methyladenine_score:98.6; 1-Methyladenine_score:98.6		67172654_:N-[(1E)-1,3-Butadien-1-yl]cyclohexanimine_ppm:0_mzLogicScore:28; 67173428_:2-Methyl-1-[(1E)-1-penten-1-yl]-1H-pyrrole_ppm:0_mzLogicScore:26; 67171850_:2-Methyl-1-[(2E)-2-penten-1-yl]-1H-pyrrole_ppm:0_mzLogicScore:32; 67171895_:2-Methyl-1-[(2E)-2-penten-2-yl]-1H-pyrrole_ppm:0_mzLogicScore:27; 4517796_:(3E)-4,7-Dimethyl-3,6-octadienenitrile_ppm:0_mzLogicScore:18; 67038183_:1-Methyl-1,2,3,…		only in one C sample
152.047	C8 H8 O3	7.252		10000	20000	100000	20	10	80	1	10	9	0.36	3.48	3.12	0.810318	0.0185539	0.0252994	99	0	0			No matches found	No matches found	No matches found	No matches found	No MS2	C8 H8 O3_ppm:-0.79_Ifit:91MatchedIso.:2			67036959_:2-Phenyl-2,3-oxiranediol_ppm:0_mzLogicScore:NA; 14553834_:2-Oxepinylacetic acid_ppm:0_mzLogicScore:NA; 14627459_:Phenyl ethaneperoxoate_ppm:0_mzLogicScore:NA; 13312940_:2-(Hydroxymethoxy)benzaldehyde_ppm:0_mzLogicScore:NA; 60827314_:5-Methoxy-3-methyl-1,2-benzoquinone_ppm:0_mzLogicScore:NA; 60823536_:5-Acetyl-6-methyl-2H-pyran-2-one_ppm:0_mzLogicScore:NA; 67032659_:3-Methoxy-6-methyl-1,…		One peak is only in E+
152.047	C8 H8 O3	6.68		100000	100000	200000	1	30	35	1	2	2	-0.01	0.64	0.65	0.995416	0.307852	0.283573	99	0	0			No matches found	No matches found	No matches found	No matches found	No MS2	C8 H8 O3_ppm:-0.6_Ifit:88MatchedIso.:2			67036959_:2-Phenyl-2,3-oxiranediol_ppm:0_mzLogicScore:NA; 14553834_:2-Oxepinylacetic acid_ppm:0_mzLogicScore:NA; 14627459_:Phenyl ethaneperoxoate_ppm:0_mzLogicScore:NA; 13312940_:2-(Hydroxymethoxy)benzaldehyde_ppm:0_mzLogicScore:NA; 60827314_:5-Methoxy-3-methyl-1,2-benzoquinone_ppm:0_mzLogicScore:NA; 60823536_:5-Acetyl-6-methyl-2H-pyran-2-one_ppm:0_mzLogicScore:NA; 67032659_:3-Methoxy-6-methyl-1,…		~same in all Rxes; up in one E+ rep
152.095	C8 H12 N2 O	2.133		20000	20000	100000	50	50	100	0.9	5	5	-0.2	2.26	2.46	0.979253	0.35512	0.297575	85	0	0			No matches found	No matches found	No matches found	No matches found	ddMS2 for preferred ion	C8 H12 N2 O_ppm:-2.65_Ifit:96MatchedIso.:2			67028322_:2-(Dimethylamino)-6-methyl-4(3H)-pyridinone_ppm:0_mzLogicScore:32; 65998734_:2-(2-Methyl-2-propanyl)-3(2H)-pyridazinone_ppm:0_mzLogicScore:29; 67024581_:4-Isopropyl-2-methoxypyrimidine_ppm:0_mzLogicScore:36; 66000636_:1-Hydroxy-1-(2-phenylethyl)hydrazine_ppm:0_mzLogicScore:26; 66737839_:5-Isopropyl-4-methyl-2-pyrimidinol_ppm:0_mzLogicScore:33; 67496420_:1-[2-(Vinyloxy)ethyl]-1H-pyrrol-2…		Present in one E+ sample, weak in other; noise in C and E-
153.054	C6 H7 N3 O2	7.278		700000	900000	200000	71.4286	2.22222	45	1	0.2	0.2	0.39	-2.08	-2.48	0.767057	0.20985	0.115813	53	0	0			No matches found	No matches found	No matches found	No matches found	ddMS2 for preferred ion	C6 H7 N3 O2_ppm:-0.99_Ifit:87MatchedIso.:2			67171965_:4-(1,2,4-Oxadiazol-5-yl)-2-pyrrolidinone_ppm:0_mzLogicScore:22; 67490672_:(4-Amino-2-oxo-1,2-dihydro-5-pyrimidinyl)acetaldehyde_ppm:0_mzLogicScore:27; 67177569_:2-(Nitromethyl)-3-pyridinamine_ppm:0_mzLogicScore:14; 67155677_:(2Z)-2-(1,3,4-Oxadiazol-2-yl)-2-butenamide_ppm:0_mzLogicScore:17; 67160973_:6-[(E)-2-Aminovinyl]-2,4(1H,3H)-pyrimidinedione_ppm:0_mzLogicScore:24; 67160622_:4,6-Dim…		~same in all Rxes
153.126	C8 H15 N3	10.813		4000	200000	2000000	12.5	50	40	50	500	10	5.55	8.87	3.32	0.00456441	0.00114661	0.0180763	13	0	0			No matches found	No matches found	No matches found	No matches found	ddMS2 for preferred ion	C8 H15 N3_ppm:-2.35_Ifit:88MatchedIso.:3			19851049_:1,4-Diisopropyl-1H-1,2,3-triazole_ppm:0_mzLogicScore:NA; 67496323_:3-Azabicyclo[3.3.1]non-6-ene-1,5-diamine_ppm:0_mzLogicScore:NA; 466657_:2-{[2-(1-Aziridinyl)ethyl]amino}-2-methylpropanenitrile_ppm:0_mzLogicScore:NA; 472785_:3-{[3-(1-Aziridinyl)propyl]amino}propanenitrile_ppm:0_mzLogicScore:NA; 476026_:N,N-Dimethyl-2-(2-methyl-1H-imidazol-5-yl)ethanamine_ppm:0_mzLogicScore:NA; 515265_:…		Only in E+ and E-. E+ >> E-
153.978	C H3 N2 O5 P	9.592		200000	200000	100000	20	20	6	1	0.6	0.6	0.05	-0.65	-0.7	0.976278	0.155604	0.131412	1	0	0			No matches found	No matches found	No matches found	No matches found	ddMS2 for preferred ion	C2 H7 N2 P S2_ppm:-2.19_Ifit:82MatchedIso.:2; C H3 N2 O5 P_ppm:3.45_Ifit:74MatchedIso.:3			17091_:MFCD01728890_ppm:0_mzLogicScore:16		~same in all Rxes
155.01		12.561		50000	40000	30000	100	25	33.3333	0.8	0.7	0.9	-0.39	-0.58	-0.19	0.996302	0.993953	0.981025	3	10	0			No matches found	No matches found	No matches found	No matches found	ddMS2 for preferred ion		Sulfamerazine_simScore:78.9; Protirelin_simScore:80.6; Angiotensin IV_simScore:83.8; Bacitracin A_simScore:83.9; 1-{2-[(1-Methyl-4-nitro-1H-imidazol-5-yl)amino]ethyl}tetrahydro-2H-imidazol-2-one_simScore:85.1; N-Acetyl-L-carnosine_simScore:98.1; Carnosine_simScore:98.1; Methyl-L-histidinate_score:51.4; 2-Amino-4-methylpyrimidine_score:77.5; L-Histidine_score:99.9		67156708_:guanidino dihydrogen phosphate_ppm:-0.001_mzLogicScore:18; 5342115_:2,4-Dioxo-1,2,3,4-tetrahydro-5-pyrimidinecarboxylate_ppm:0_mzLogicScore:35; 1232048_:4,5-dihydroorotate_ppm:0_mzLogicScore:37		~same in all
156.053	C6 H8 N2 O3	10.062		20000	50000	400000	35	20	50	3	30	8	1.75	4.69	2.93	0.0884131	0.0066856	0.0263689	46	3	1	66.6	54.8	No matches found	Single match found	No matches found	No matches found	ddMS2 for preferred ion	C6 H8 N2 O3_ppm:-2.2_Ifit:92MatchedIso.:2	Unguisin E_simScore:70.4; Imidazolelactic acid_score:66.6	Imidazole lactate_score:54.8	15289212_:7-Oxo-1,3-diazabicyclo[3.2.0]heptane-2-carboxylic acid_ppm:0_mzLogicScore:27; 66424287_:1-(Aminoacetyl)-2,5-pyrrolidinedione_ppm:0_mzLogicScore:27; 67174869_:(3-Hydroxy-4-oxo-1,2,3,4-tetrahydro-3-pyridazinyl)acetaldehyde_ppm:0_mzLogicScore:21; 67161845_:5-Methoxy-2,3-dihydro-3-pyridazinecarboxylic acid_ppm:0_mzLogicScore:21; 14491787_:6-Methyl-2-oxo-1,2,3,4-tetrahydro-5-pyrimidinecarbox…		only in E+
156.076	C4 H8 N6 O	2.735		3000000	300000	400000	33.3333	13.3333	17.5	0.1	0.1	1	-3.29	-3.08	0.21	0.00534378	0.00645443	0.835135	3	0	0			No matches found	No matches found	No matches found	No matches found	ddMS2 for preferred ion	C4 H8 N6 O_ppm:-0.38_Ifit:50MatchedIso.:3			63483_:hydroxymethylmelamine_ppm:0_mzLogicScore:3; 479850_:1,1-Dimethyl-3-(2H-tetrazol-5-yl)urea_ppm:0_mzLogicScore:3; 3515961_:4-Amino-3-hydrazino-6-methyl-1,2,4-triazin-5(4H)-one_ppm:0_mzLogicScore:10		up in C
156.089		11.105		600000	700000	400000	8.33333	2.85714	50	1	0.6	0.5	0.08	-0.79	-0.87	0.987819	0.341905	0.298756	0	0	0			No matches found	No matches found	No matches found	No matches found	No MS2						~same in all
156.089	C7 H12 N2 O2	11.012		700000	700000	400000	10	4.28571	25	1	0.7	0.6	0.05	-0.61	-0.66	0.983256	0.218896	0.188218	45	23	0			No matches found	No matches found	No matches found	No matches found	ddMS2 for preferred ion	C7 H12 N2 O2_ppm:-3.12_Ifit:86MatchedIso.:2	Glycylproline_simScore:94.4; Leucylproline_simScore:95.3; L-Alanyl-L-proline_simScore:95.6; Captopril_simScore:96.4; Valylproline_simScore:96.6; Ornithine_simScore:98.6; Argininosuccinic acid_simScore:99.1; S-Methyl-L-thiocitrulline_simScore:99.1; DL-Arginine_score:98.1; Proline_score:98.4		4929798_:2,2,5-Trimethyl-4-nitroso-2,3-dihydro-1H-pyrrol-1-ol_ppm:0_mzLogicScore:26; 21376636_:1,5-diazabicyclo(3.3.0)octane-2-carboxylic acid_ppm:0_mzLogicScore:38; 67030878_:N-Hydroxy-4-methyl-2-nitroso-1-cyclohexen-1-amine_ppm:0_mzLogicScore:25; 66425232_:4-Ethyl-5-oxo-3-propyl-5H-1,2,3-oxadiazol-3-ium-2-ide_ppm:0_mzLogicScore:26; 60682906_:2,5-Dimethyl-1-nitroso-4-piperidinone_ppm:0_mzLogicSc…		~same in all Rxes
156.115	C9 H16 O2	2.388		200000	300000	200000	10	33.3333	15	1	1	0.9	0.29	0.08	-0.2	0.847132	0.976573	0.933956	230	0	0			No matches found	No matches found	No matches found	No matches found	ddMS2 for preferred ion	C9 H16 O2_ppm:-0.3_Ifit:75MatchedIso.:2			492580_:2-(2-Methoxyethyl)cyclohexanone_ppm:0_mzLogicScore:NA; 465984_:2-Pentanyl methacrylate_ppm:0_mzLogicScore:NA; 122259_:2-Oxecanone_ppm:0_mzLogicScore:NA; 474907_:2,4-Dimethyl-3,5-heptanedione_ppm:0_mzLogicScore:NA; 55251_:Methyl 2-octenoate_ppm:0_mzLogicScore:NA; 210047_:2-Isobutoxy-3,4-dihydro-2H-pyran_ppm:0_mzLogicScore:NA; 166687_:MFCD11502206_ppm:0_mzLogicScore:NA; 192305_:2,3-Dimethyl…		~same in all
158.02		8.96		9000	50000	200000	33.3333	60	15	5	30	5	2.39	4.66	2.28	0.106439	0.0151325	0.0830893	1	0	0			No matches found	No matches found	No matches found	No matches found	ddMS2 for preferred ion				118691_:2,6-Dioxo(4-~14~C)-1,2,3,6-tetrahydro-4-pyrimidinecarboxylic acid_ppm:0_mzLogicScore:14		Present in E+ and E-, probably not in C
158.044	C4 H6 N4 O3	11.753		40000	200000	600000	50	45	6.66667	5	10	3	2.19	3.73	1.54	0.0549431	0.0122053	0.115052	7	17	0			No matches found	No matches found	No matches found	No matches found	ddMS2 for preferred ion	C4 H6 N4 O3_ppm:-2.17_Ifit:83MatchedIso.:4	4-[2-(2-Thienylcarbonyl)hydrazino]benzenesulfonamide_simScore:64.4; Sulfadoxine_simScore:65.1; Sulpiride_simScore:65.5; Methyl 4-(anilinosulfonyl)-2,5-dimethyl-3-furoate_simScore:65.8; Sulfamethoxypyridazine_simScore:66.3; Darunavir_simScore:67.1; Sulfamethoxazole_simScore:67.2; Sulfathiazole_simScore:67.2; Benzenesulfonamide_simScore:67.2		9979696_:Ethyl 1-hydroxy-1H-tetrazole-5-carboxylate_ppm:0_mzLogicScore:28; 24203822_:Methyl 5-methoxy-2H-tetrazole-2-carboxylate_ppm:0_mzLogicScore:24; 10567339_:4-Methyl-1,2,5-oxadiazole-3-carbohydrazide 2-oxide_ppm:0_mzLogicScore:30; 10567338_:4-Methyl-1,2,5-oxadiazole-3-carbohydrazide 5-oxide_ppm:0_mzLogicScore:30; 388779_:(R)-(-)-allantoin_ppm:0_mzLogicScore:23; 388780_:(S)-(+)-allantoin_ppm:…		Up in E+, weak but present in all 3
158.057	C7 H10 O4	2.064		6000	100000	5000	13.3333	200	16	20	0.9	0.04	4.44	-0.23	-4.66	0.436176	0.993203	0.394606	57	3	0			No matches found	No matches found	No matches found	No matches found	ddMS2 for preferred ion	C7 H10 O4_ppm:-2.99_Ifit:81MatchedIso.:2	9-Nitrooleate_simScore:69.2; 2,2,6,6-Tetramethyl-4-piperidinol_score:88.8; 2,2,6,6-Tetramethyl-1-piperidinol (TEMPO)_score:94.9		67031305_:(2S)-2-(Hydroxymethyl)-2-oxiranyl methacrylate_ppm:0_mzLogicScore:15; 67494725_:1,3-Dioxolan-2-ylmethyl acrylate_ppm:0_mzLogicScore:11; 67491993_:1,4-Dioxonane-5,9-dione_ppm:0_mzLogicScore:21; 389418_:(5R,6R)-2,6-Dihydroxy-5-(hydroxymethyl)-2-cyclohexen-1-one_ppm:0_mzLogicScore:30; 10184351_:3-(Methacryloyloxy)propanoic acid_ppm:0_mzLogicScore:15; 5323201_:2,2-Dimethylpentanedioate_ppm:…		Onlyin E-
158.069	C6 H10 N2 O3	10.282		200000	300000	200000	50	10	40	2	1	0.8	0.84	0.52	-0.32	0.467149	0.672502	0.904161	32	0	0			No matches found	No matches found	No matches found	No matches found	ddMS2 for preferred ion	C6 H10 N2 O3_ppm:-2.72_Ifit:78MatchedIso.:2			67038584_:4-Nitro-2-azepanone_ppm:0_mzLogicScore:26; 65998990_:(2S)-Amino[(5S)-3-methyl-4,5-dihydro-1,2-oxazol-5-yl]acetic acid_ppm:0_mzLogicScore:26; 67171434_:Methyl 1-amino-5-oxo-3-pyrrolidinecarboxylate_ppm:0_mzLogicScore:16; 67157639_:1-Pyrrolidinyl N-oxoglycinate_ppm:0_mzLogicScore:13; 67160947_:Ethyl (2Z)-3-amino-2-carbamoylacrylate_ppm:0_mzLogicScore:14; 67159300_:4-(1-Nitrovinyl)morpholi…		~same in all
158.105	C7 H14 N2 O2	3.91		400000	500000	900000	7.5	12	11.1111	1	2	2	0.35	1.18	0.83	0.249824	0.0132011	0.0352631	40	0	0			No matches found	No matches found	No matches found	No matches found	ddMS2 for preferred ion	C7 H14 N2 O2_ppm:-2.54_Ifit:71MatchedIso.:2			67031939_:N-[(1E)-1-(Hydroxyimino)-2-methyl-2-propanyl]-N-isopropylideneamine oxide_ppm:0_mzLogicScore:15; 67036118_:Methyl 6-amino-6-iminohexanoate_ppm:0_mzLogicScore:32; 65792875_:(4R)-4-(1-Aminoethyl)-L-proline_ppm:0_mzLogicScore:40; 65793814_:N,N'-Bis(2-methoxyethyl)carbodiimide_ppm:0_mzLogicScore:15; 67177992_:1-Acetoxy-4-methylpiperazine_ppm:0_mzLogicScore:33; 67160012_:(2R)-2-(3-Aminopropy…		Highest in E+, present in C and E-
159.089	C7 H13 N O3	11.203		20000	60000	300000	35	33.3333	20	3	10	4	1.66	3.65	1.99	0.0662602	0.00754869	0.040209	74	3	0			No matches found	No matches found	No matches found	No matches found	ddMS2 for preferred ion	C7 H13 N O3_ppm:-2.36_Ifit:99MatchedIso.:2	Validamycin A_simScore:66.3; (5aS,9S,9aR)-9b-Hydroxy-6,6,9a-trimethyl-3-oxo-1,3,5,5a,6,7,8,9,9a,9b-decahydronaphtho[1,2-c]furan-9-yl N-acetylvalinate_simScore:76.5; Netilmicin_simScore:81.9		67034055_:1-(Methoxymethyl)-L-proline_ppm:0_mzLogicScore:29; 13360129_:4-(Hydroxymethyl)-1-piperidinecarboxylic acid_ppm:0_mzLogicScore:27; 67035254_:(1-Hydroxy-2-piperidinyl)acetic acid_ppm:0_mzLogicScore:33; 66000042_:3-Amino-4-methyl-2-oxohexanoic acid_ppm:0_mzLogicScore:34; 35014136_:8-Azabicyclo[3.2.1]octane-1,2,4-triol_ppm:0_mzLogicScore:34; 35013346_:8-Azabicyclo[3.2.1]octane-1,2,7-triol_p…		Only in E+, E-; not super clean
159.894		22.122		2000000	2000000	1000000	10	5	4	0.9	0.5	0.6	-0.16	-0.96	-0.81	0.405959	0.00540159	0.00897171	0	0	0			No matches found	No matches found	No matches found	No matches found	ddMS2 for preferred ion						~same in all Rxes
160.11	C8 H16 O3	3.193		40000000	7000000	1000000	25	14.2857	100	0.2	0.03	0.2	-2.71	-4.87	-2.16	0.0727948	0.0133369	0.0981969	104	0	0			No matches found	No matches found	No matches found	No matches found	ddMS2 for preferred ion	C8 H16 O3_ppm:-0.97_Ifit:73MatchedIso.:4			61040658_:2-(Tetrahydro-2H-pyran-2-yl)-1,2-propanediol_ppm:0_mzLogicScore:42; 60687834_:2,3-Dihydroxy-3-methyl-4-heptanone_ppm:0_mzLogicScore:35; 15347904_:2-Ethyl-6-hydroxyhexanoic acid_ppm:0_mzLogicScore:42; 10799173_:1-Isobutoxyethyl acetate_ppm:0_mzLogicScore:19; 469458_:1,3-Dioxolane, 2-methoxymethyl-2,4,5-trimethyl-_ppm:0_mzLogicScore:19; 9194341_:Butyl (3S)-3-hydroxybutanoate_ppm:0_mzLogic…		Highest in C, about equal in E- and E+
161.036	C5 H8 Cl N3 O	9.549		100000	200000	90000	20	10	22.2222	1	0.7	0.5	0.39	-0.48	-0.88	0.363116	0.270094	0.074163	4	0	0			No matches found	No matches found	No matches found	No matches found	ddMS2 for preferred ion	C4 H8 N3 O2 P_ppm:0.86_Ifit:100MatchedIso.:1; C5 H8 Cl N3 O_ppm:-0.24_Ifit:85MatchedIso.:2			10636066_:Diazo(phenyl)acetate_ppm:0_mzLogicScore:41; 3334438_:1H-Indazole-3-carboxylate_ppm:0_mzLogicScore:42; 21378663_:pyrrolo(2,3-c)pyridine-5-carboxylate_ppm:0_mzLogicScore:34; 2817363_:1H-Benzimidazole-5-carboxylate_ppm:0_mzLogicScore:39		~same in all Rxes
161.041		11.437		300000	200000	300000	66.6667	100	6.66667	0.7	1	1	-0.42	0.14	0.56	0.910506	0.923931	0.727234	0	12	0			No matches found	No matches found	No matches found	No matches found	ddMS2 for preferred ion		L(-)-Carnitine_score:99.6; D-Carnitine_score:99.6; DL-Carnitine_score:99.7				~same in all
161.042	C6 H12 N P S	11.412		900000	1000000	600000	8.88889	8	10	1	0.6	0.5	0.19	-0.74	-0.93	0.381979	0.0190577	0.00987106	1	12	0			No matches found	No matches found	No matches found	No matches found	ddMS2 for preferred ion	C6 H12 N P S_ppm:-2.31_Ifit:55MatchedIso.:2	L(-)-Carnitine_score:99.6; D-Carnitine_score:99.6; DL-Carnitine_score:99.7		78911_:3-cyanopropyldimethylchlorosilane_ppm:0_mzLogicScore:22		Gigantic mess. Hard to see what's going on.
161.047	C9 H7 N O2	7.6		20000	9000	100000	4	33.3333	80	0.4	5	10	-1.43	2.42	3.85	0.202372	0.0796447	0.0211631	112	0	0			No matches found	No matches found	No matches found	No matches found	No MS2	C3 H8 N5 O P_ppm:3.8_Ifit:100MatchedIso.:1; C9 H7 N O2_ppm:-2.61_Ifit:87MatchedIso.:2			14416731_:7,8-Isoquinolinediol_ppm:0_mzLogicScore:NA; 60735438_:3,5-Quinolinediol_ppm:0_mzLogicScore:NA; 61237931_:7-Amino-4H-chromen-4-one_ppm:0_mzLogicScore:NA; 4934349_:1-(2-Furyl)-1H-pyrrole-2-carbaldehyde_ppm:0_mzLogicScore:NA; 4521751_:(6E)-6-(1,2-Oxazol-5(2H)-ylidene)-2,4-cyclohexadien-1-one_ppm:0_mzLogicScore:NA; 37492624_:1-(2,1-Benzoxazol-3-yl)ethanone_ppm:0_mzLogicScore:NA; 11633037_:5…		Highest in E+, E+ >> C > E-
161.166		11.406		700000	300000	400000	14.2857	66.6667	25	0.5	0.5	1	-1.15	-0.91	0.24	0.277727	0.467743	0.840219	0	3	0			No matches found	No matches found	No matches found	No matches found	ddMS2 for preferred ion		L(-)-Carnitine_score:99.6; D-Carnitine_score:99.6; DL-Carnitine_score:99.7				~same in all
161.167		11.419		600000	1000000	700000	33.3333	40	5.71429	2	1	0.6	1.08	0.22	-0.85	0.172258	0.816828	0.297648	0	9	0			No matches found	No matches found	No matches found	No matches found	ddMS2 for preferred ion		L(-)-Carnitine_score:99.6; D-Carnitine_score:99.6; DL-Carnitine_score:99.7				huge mess
161.956		22.14		3000000	3000000	2000000	13.3333	10	2.5	1	0.6	0.6	-0.05	-0.82	-0.77	0.938125	0.0250069	0.0299048	0	0	0			No matches found	No matches found	No matches found	No matches found	ddMS2 for preferred ion						~same in all Rxes
162.052	C6 H10 O5	13.136		200000	200000	1000000	40	20	100	1	6	7	-0.06	2.68	2.74	0.999875	0.301778	0.297717	82	9	0			No matches found	No matches found	No matches found	No matches found	ddMS2 for preferred ion	C6 H10 O5_ppm:-2.47_Ifit:80MatchedIso.:3	L(-)-Carnitine_score:99.6; D-Carnitine_score:99.6; DL-Carnitine_score:99.7		67039439_:(2S)-2-Hydroxy-2-[(1R,2S)-1,2,3-trihydroxypropyl]cyclopropanone_ppm:0_mzLogicScore:29; 11200446_:2,3-Dihydroxypropyl 2-oxopropanoate_ppm:0_mzLogicScore:23; 58837573_:(3S,4S,5R)-3,4-Dihydroxy-5-[(1R)-1-hydroxyethyl]dihydro-2(3H)-furanone (non-preferred name)_ppm:0_mzLogicScore:35; 58837576_:6-Deoxy-alpha-D-arabino-hexopyranos-3-ulose_ppm:0_mzLogicScore:29; 58837673_:6-Deoxy-D-arabino-hex…		Only present in E+?
162.053	C6 H10 O5	11.319		70000	200000	600000	28.5714	5	66.6667	3	9	3	1.57	3.19	1.62	0.130853	0.0250267	0.154011	82	1	0			No matches found	No matches found	No matches found	No matches found	ddMS2 for preferred ion	C6 H10 O5_ppm:-1.82_Ifit:90MatchedIso.:2	Albendazole-2-aminosulfone_simScore:79		67039439_:(2S)-2-Hydroxy-2-[(1R,2S)-1,2,3-trihydroxypropyl]cyclopropanone_ppm:0_mzLogicScore:31; 11200446_:2,3-Dihydroxypropyl 2-oxopropanoate_ppm:0_mzLogicScore:30; 58837573_:(3S,4S,5R)-3,4-Dihydroxy-5-[(1R)-1-hydroxyethyl]dihydro-2(3H)-furanone (non-preferred name)_ppm:0_mzLogicScore:31; 58837576_:6-Deoxy-alpha-D-arabino-hexopyranos-3-ulose_ppm:0_mzLogicScore:34; 58837673_:6-Deoxy-D-arabino-hex…		Highest in E+, present in all?
162.053	C6 H10 O5	13.687		400000	100000	100000	75	100	40	0.4	0.4	1	-1.42	-1.4	0.02	0.369552	0.441337	0.97897	82	33	0			No matches found	No matches found	No matches found	No matches found	ddMS2 for preferred ion	C6 H10 O5_ppm:-1.78_Ifit:89MatchedIso.:2	Prulaurasin_simScore:62.3; 3-Ethyl-4-hydroxy-4-methylpentyl 6-O-[(2S,3R,4R)-3,4-dihydroxy-4-(hydroxymethyl)tetrahydro-2-furanyl]-β-D-glucopyranoside_simScore:63.4; Trigoneoside Xb_simScore:74.5; 2-(4-Methyl-3-cyclohexen-1-yl)-2-propanyl 6-O-(6-deoxy-α-L-mannopyranosyl)-β-D-glucopyranoside_simScore:78; (1S,2S,8ξ,9β,16α,17ξ)-1-(β-D-Glucopyranosyloxy)-2,16,20-trihydroxy-9,10,14-trimethyl-11,22-dioxo…		67039439_:(2S)-2-Hydroxy-2-[(1R,2S)-1,2,3-trihydroxypropyl]cyclopropanone_ppm:0_mzLogicScore:31; 11200446_:2,3-Dihydroxypropyl 2-oxopropanoate_ppm:0_mzLogicScore:32; 58837573_:(3S,4S,5R)-3,4-Dihydroxy-5-[(1R)-1-hydroxyethyl]dihydro-2(3H)-furanone (non-preferred name)_ppm:0_mzLogicScore:31; 58837576_:6-Deoxy-alpha-D-arabino-hexopyranos-3-ulose_ppm:0_mzLogicScore:35; 58837673_:6-Deoxy-D-arabino-hex…		Up in C
162.053	C6 H10 O5	12.48		5000000	3000000	2000000	20	16.6667	5	0.7	0.5	0.7	-0.54	-0.97	-0.44	0.288247	0.079725	0.373506	82	60	0			No matches found	No matches found	No matches found	No matches found	ddMS2 for preferred ion	C6 H10 O5_ppm:-1.76_Ifit:85MatchedIso.:3	Trigoneoside Xb_simScore:74.5; β-D-Glucopyranosyl-(1->2)-6-O-[(2E)-2-methyl-2-butenoyl]-α-D-glucopyranosyl β-D-glucopyranosyl-(1->2)-6-O-[(2E)-2-methyl-2-butenoyl]-D-glucopyranoside_simScore:75.3; (3β,5ξ,9ξ,18ξ)-22-Hydroxyolean-12-en-3-yl 6-deoxy-α-L-mannopyranosyl-(1->2)hexopyranosyl-(1->2)-β-D-glucopyranosiduronic acid_simScore:76.8; Albendazole-2-aminosulfone_simScore:79; Andrographiside_simSc…		67039439_:(2S)-2-Hydroxy-2-[(1R,2S)-1,2,3-trihydroxypropyl]cyclopropanone_ppm:0_mzLogicScore:45; 11200446_:2,3-Dihydroxypropyl 2-oxopropanoate_ppm:0_mzLogicScore:42; 58837573_:(3S,4S,5R)-3,4-Dihydroxy-5-[(1R)-1-hydroxyethyl]dihydro-2(3H)-furanone (non-preferred name)_ppm:0_mzLogicScore:45; 58837576_:6-Deoxy-alpha-D-arabino-hexopyranos-3-ulose_ppm:0_mzLogicScore:48; 58837673_:6-Deoxy-D-arabino-hex…		~same in all; up in one C rep
163.049	C6 H5 N5 O	9.423		50000	20000	100000	40	20	50	0.3	2	8	-1.72	1.23	2.95	0.0975344	0.187124	0.0232113	20	1	0			No matches found	No matches found	No matches found	No matches found	ddMS2 for preferred ion	C6 H13 N S2_ppm:0.23_Ifit:42MatchedIso.:2; C6 H5 N5 O_ppm:-2.65_Ifit:95MatchedIso.:2	3-Methoxy-1-({5-[(2-oxo-2-phenylethyl)thio]-1,3,4-oxadiazol-2-yl}methyl)-1,2-dihydropyridin-2-one_simScore:72.1		11510001_:4-(1H-1,2,4-Triazol-1-yl)-2(1H)-pyrimidinone_ppm:0_mzLogicScore:14; 67035963_:2,2-Bis(ethylsulfanyl)ethenamine_ppm:0_mzLogicScore:12; 65793326_:6-Amino[1,2,3]triazolo[4,5-b]azepin-5(4H)-one_ppm:0_mzLogicScore:23; 67027212_:6-(1H-1,2,3-Triazol-4-yl)-3(2H)-pyridazinone_ppm:0_mzLogicScore:18; 67170290_:2-(5-Methyl-1,2,4-oxadiazol-3-yl)-1,3,5-triazine_ppm:0_mzLogicScore:11; 67169733_:1,2,3-…		Highest in E+, then C, then E-
163.066	C6 H13 N O2 S	9.381		70000	200000	400000	42.8571	15	50	3	5	2	1.36	2.29	0.93	0.20511	0.0743133	0.482249	31	0	0			No matches found	No matches found	No matches found	No matches found	ddMS2 for preferred ion	C6 H13 N O2 S_ppm:-2.74_Ifit:65MatchedIso.:3			67496955_:(2R)-2-Amino-3-(ethylsulfanyl)butanoic acid_ppm:0_mzLogicScore:24; 67162651_:6-Nitro-1-hexanethiol_ppm:0_mzLogicScore:16; 18864269_:N-Methyl-3-sulfanyl-L-valine_ppm:0_mzLogicScore:24; 29369823_:(2R)-2-Amino-4-methyl-3-sulfanylpentanoic acid_ppm:0_mzLogicScore:24; 50366679_:S-Propyl-D-cysteine_ppm:0_mzLogicScore:20; 500502_:Carbomethoxy diethylamino sulfide_ppm:0_mzLogicScore:8; 85838_:S…		Highest in E+; reps don't agree well
163.12	C7 H17 N O3	16.689		60000	70000	600000	33.3333	2.85714	116.667	1	10	9	0.15	3.26	3.11	0.988037	0.200386	0.227838	5	0	0			No matches found	No matches found	No matches found	No matches found	ddMS2 for preferred ion	C7 H17 N O3_ppm:-2.1_Ifit:83MatchedIso.:3			480372_:2-[(2-Methoxyethoxy)amino]-2-methyl-1-propanol_ppm:0_mzLogicScore:12; 478147_:3-Methyl-3-dimethoxyamino-butan-1-ol_ppm:0_mzLogicScore:16; 88191_:1-[Bis(2-hydroxyethyl)amino]-2-propanol_ppm:0_mzLogicScore:25; 2286041_:2-(2-(2-Methoxyethoxy)ethoxy)ethylamine_ppm:0_mzLogicScore:12; 394944_:TRIS(HYDROXYETHYL)AMINOMETHANE_ppm:0_mzLogicScore:17		Only in E+, inconsistent across reps
163.91	C H2 Cl2 O3 S	3.522		100000	80000	400000	10	25	75	0.7	3	5	-0.43	1.8	2.23	0.843871	0.257042	0.157487	0	1	0			No matches found	No matches found	No matches found	No matches found	ddMS2 for preferred ion	C H2 Cl2 O3 S_ppm:-0.61_Ifit:81MatchedIso.:3	3-[2-({[(4-chloroanilino)carbonyl]oxy}imino)propyl]-1-(5-methylisoxazol-3-yl)-1H-1,2,4-triazole_simScore:77.9				Highest in E+, multiple peaks that are not well aligned
163.963	C3 H5 N2 P S2	9.592		1000000	2000000	900000	20	5	10	1	0.7	0.5	0.41	-0.47	-0.88	0.138196	0.101817	0.0199854	0	32	0			No matches found	No matches found	No matches found	No matches found	ddMS2 for preferred ion	C2 H N2 O5 P_ppm:3.48_Ifit:64MatchedIso.:2; C3 H5 N2 P S2_ppm:-1.81_Ifit:43MatchedIso.:3	Deschloro W-19_simScore:80.4; Aminorex_simScore:80.4; Anileridine_simScore:80.4; 4,4'-Methylenebis(2-methylaniline)_simScore:80.5; 1-(2-Hydroxy-2-phenylethyl)-3-[3-(trifluoromethyl)phenyl]urea_simScore:80.5; W-19_simScore:80.5; 5-Benzyl-3-phenylimidazolidine-2,4-dione_simScore:81.1; 5-[(2-Hydroxy-2-phenylethyl)amino]-5-oxo-3-phenylpentanoic acid_simScore:82.3; α-Aspartylphenylalanine_simScore:86;…				very messy, multiple peaks, in all samples
163.967	C7 H O3 P	21.804		3000000	3000000	2000000	10	2	10	1	0.7	0.8	-0.02	-0.43	-0.4	0.985658	0.0706407	0.0790261	0	0	0			No matches found	No matches found	No matches found	No matches found	ddMS2 for preferred ion	C7 H O3 P_ppm:4.29_Ifit:42MatchedIso.:2					~same in all Rxes
164.084	C3 H12 N6 S	2.822		200000	200000	100000	15	20	30	1	0.9	0.8	0.28	-0.13	-0.41	0.6333	0.894015	0.426744	245	1	0			No matches found	No matches found	No matches found	No matches found	ddMS2 for preferred ion	C10 H12 O2_ppm:-0.6_Ifit:72MatchedIso.:2; C3 H12 N6 S_ppm:-4.77_Ifit:83MatchedIso.:2	3-[2-({[(4-chloroanilino)carbonyl]oxy}imino)propyl]-1-(5-methylisoxazol-3-yl)-1H-1,2,4-triazole_simScore:77.9		745429_:4663842_ppm:0_mzLogicScore:35; 12128_:gamma-Thujaplicin_ppm:0_mzLogicScore:18; 125589_:2,6-Adamantandione_ppm:0_mzLogicScore:15; 77292_:1,2-Dihydroxytetralin_ppm:0_mzLogicScore:35; 5001889_:2-Hydroxy-5-isopropylbenzaldehyde_ppm:0_mzLogicScore:38; 70174_:2-Allyloxyanisole_ppm:0_mzLogicScore:37; 453371_:MFCD00157315_ppm:0_mzLogicScore:35; 88651_:((m-tolyloxy)methyl)oxirane_ppm:0_mzLogicScor…		~same in all
165.065	C6 H7 N5 O	8.809		30000	20000	100000	10	20	70	0.7	6	8	-0.42	2.53	2.95	0.668367	0.0269689	0.0173113	43	2	0	79.8		No matches found	No matches found	No matches found	No matches found	ddMS2 for preferred ion	C6 H15 N S2_ppm:0.41_Ifit:42MatchedIso.:2; C6 H7 N5 O_ppm:-2.43_Ifit:75MatchedIso.:3	1-Methylguanine_score:79.5; 7-Methylguanine_score:79.8		509412_:6,7-Dimethyltetrazolo[1,5-c]pyrimidin-5(6H)-one_ppm:0_mzLogicScore:26; 518579_:3-Methoxy-2-methyl-2H-pyrazolo[4,3-E][1,2,4]triazin_ppm:0_mzLogicScore:30; 518602_:7-Amino-6-methyl[1,2,4]triazolo[1,5-c]pyrimidin-5(6H)-one_ppm:0_mzLogicScore:30; 518634_:3-Methoxy-1-methyl-1H-pyrazolo[4,3-e][1,2,4]triazine_ppm:0_mzLogicScore:9; 518637_:1,6-Dimethyl[1,2,4]triazolo[3,4-c][1,2,4]triazin-5(1H)-on…		Highest in E+, maybe present in C and E-, but "peaks" could be noise
165.958	C3 H4 O4 P2	9.602		300000	400000	200000	30	20	10	1	0.7	0.6	0.37	-0.47	-0.84	0.42955	0.339038	0.101634	5	0	0			No matches found	No matches found	No matches found	No matches found	ddMS2 for other ion	C3 H4 O4 P2_ppm:-1.35_Ifit:79MatchedIso.:2			67039110_:5,5-Dichloro-4-pentene-2,3-dione_ppm:0.001_mzLogicScore:NA; 459796_:2-Propyn-1-yl dichloroacetate_ppm:0.001_mzLogicScore:NA; 10253985_:2,3-Dichloro-4-hydroxy-2-cyclopenten-1-one_ppm:0.001_mzLogicScore:NA; 473756_:2,2-Dichloro-1,3-cyclopentanedione_ppm:0.001_mzLogicScore:NA; 102929_:3-Chloro-4-(chloromethyl)-2(5H)-furanone_ppm:0.001_mzLogicScore:NA		~same in all Rxes
166.03	C7 H7 N2 O P	8.863		3000	8000	100000	26.6667	75	100	2	30	10	1.27	4.89	3.63	0.746079	0.101369	0.186927	7	0	0			No matches found	No matches found	No matches found	No matches found	ddMS2 for preferred ion	C5 H10 O4 S_ppm:-2.81_Ifit:66MatchedIso.:2; C7 H7 N2 O P_ppm:-0.52_Ifit:86MatchedIso.:2			67033605_:3-Methyltetrahydro-2,3-thiophenediol 1,1-dioxide_ppm:0_mzLogicScore:19; 61475859_:1-Thio-D-ribose_ppm:0_mzLogicScore:21; 5370347_:(3S,4S)-4-Methoxytetrahydro-3-thiopheneol 1,1-dioxide_ppm:0_mzLogicScore:19; 19013784_:2-(Methylsulfonyl)ethyl acetate_ppm:0_mzLogicScore:17; 276025_:3-Oxo-2-butanyl methanesulfonate_ppm:0_mzLogicScore:22; 473336_:Methyl 3-(methoxysulfinyl)propanoate_ppm:0_mz…		Only in E+
166.048	C5 H10 O6	2.249		300000	1000000	1000000	33.3333	2	100	4	3	0.8	1.85	1.59	-0.25	0.50565	0.884086	0.743955	10	1	0			No matches found	No matches found	No matches found	No matches found	ddMS2 for preferred ion	C5 H10 O6_ppm:1.37_Ifit:68MatchedIso.:2	3-[2-({[(4-chloroanilino)carbonyl]oxy}imino)propyl]-1-(5-methylisoxazol-3-yl)-1H-1,2,4-triazole_simScore:77.9		388393_:L-glycero-Pentonic acid_ppm:0_mzLogicScore:30; 559150_:L-Lyxonic acid_ppm:0_mzLogicScore:30; 5034778_:MFCD11974935_ppm:0_mzLogicScore:30; 5341919_:L-Ribonic acid_ppm:0_mzLogicScore:30; 5341922_:L-Xylonic acid_ppm:0_mzLogicScore:30; 134810_:D-Lyxonic acid_ppm:0_mzLogicScore:30; 4574162_:D-Ribonic acid_ppm:0_mzLogicScore:30; 9845_:Pentonic acid_ppm:0_mzLogicScore:30; 108861_:Arabonic Acid_p…		~same in all; up in one E+ rep
167.025	C7 H6 Cl N3	7.998		400000	300000	500000	12.5	26.6667	6	0.7	1	2	-0.54	0.28	0.82	0.24289	0.593751	0.101681	4	2	0	54.7		No matches found	No matches found	No matches found	No matches found	ddMS2 for preferred ion	C6 H6 N3 O P_ppm:1.16_Ifit:64MatchedIso.:2; C4 H9 N O4 S_ppm:-1.12_Ifit:80MatchedIso.:3	Quinolinic acid_score:54.5; 6-Chloro-5-methyl-1H-1,2,3-benzotriazole_score:54.7		465115_:5-(Methylsulfonyl)-1,3,5-dioxazinane_ppm:0_mzLogicScore:12; 142032_:MFCD00171284_ppm:0_mzLogicScore:12; 133447_:4-Morpholinesulfonic acid_ppm:0_mzLogicScore:12; 140553_:acetyltaurine_ppm:0_mzLogicScore:12		Highest in E+, but messy pattern (multiple peaks not well aligned)
167.069	C7 H9 N3 O2	12.103		200000	100000	100000	10	40	30	0.7	0.7	1	-0.53	-0.55	-0.01	0.391413	0.386014	0.99987	38	0	0			No matches found	No matches found	No matches found	No matches found	ddMS2 for preferred ion	C7 H9 N3 O2_ppm:-2.47_Ifit:69MatchedIso.:2			67039309_:1-Amino-1H-pyrazol-3-yl (2E)-2-butenoate_ppm:0_mzLogicScore:12; 20474683_:1-(3-Methoxyphenyl)-3-oxotriazane_ppm:0_mzLogicScore:13; 67492914_:(4E)-4-(Hydroxyimino)-4,5,6,7-tetrahydro-1H-benzimidazol-1-ol_ppm:0_mzLogicScore:28; 67162003_:1,4-Dihydro-3,5-pyridinedicarboxamide_ppm:0_mzLogicScore:22; 67166147_:1,2,3,5-Tetrahydropyrazolo[1,5-a]pyrimidine-7-carboxylic acid_ppm:0_mzLogicScore:2…		~same in all
167.105	C8 H13 N3 O	8.017		30000	200000	100000	100	50	100	5	3	0.7	2.29	1.76	-0.53	0.502358	0.774002	0.854491	17	0	0			No matches found	No matches found	No matches found	No matches found	ddMS2 for preferred ion	C8 H13 N3 O_ppm:-2.53_Ifit:89MatchedIso.:2			67028751_:(5Z)-2,3-Dimethyl-5-[2-(methylamino)ethylidene]-3,5-dihydro-4H-imidazol-4-one_ppm:0_mzLogicScore:10; 67176608_:(2E)-2-Cyano-3-(isopropylamino)-2-butenamide_ppm:0_mzLogicScore:8; 67156384_:1-{[2-(1H-Imidazol-4-yl)ethyl]amino}acetone_ppm:0_mzLogicScore:10; 60610231_:1,2,3,4,5a,6,7,8-Octahydro-5H-pyrido[2,3-e][1,4]diazepin-5-one_ppm:0_mzLogicScore:11; 60986971_:6-Butoxy-3-pyridazinamine_pp…		~same in all; big mess
167.142	C9 H17 N3	9.455		2000	3000	30000	30	33.3333	100	2	20	10	0.69	4.3	3.61	0.778049	0.0401837	0.062154	4	0	0			No matches found	No matches found	No matches found	No matches found	No MS2	C9 H17 N3_ppm:-2.39_Ifit:62MatchedIso.:2			67497871_:3-Methyl-3-azabicyclo[3.3.1]non-6-ene-1,5-diamine_ppm:0_mzLogicScore:NA; 479080_:4-Amino-4-cyano-1,2.5-trimethylpiperidine_ppm:0_mzLogicScore:NA; 474043_:N,N-Bis(1-aziridinylmethyl)cyclopropanamine_ppm:0_mzLogicScore:NA; 479422_:6-Amino-5-methyl-1,3-diazaadamantane_ppm:0_mzLogicScore:NA		Only in E+
167.938	C2 H2 O5 P2	21.814		8000000	7000000	5000000	7.5	5.71429	4	1	0.7	0.7	-0.03	-0.61	-0.58	0.924311	0.0121102	0.0141934	4	0	0			No matches found	No matches found	No matches found	No matches found	ddMS2 for preferred ion	C2 H2 O5 P2_ppm:3.26_Ifit:58MatchedIso.:3			67166044_:(2E)-3,4-Dichloro-4-oxo-2-butenoic acid_ppm:0_mzLogicScore:NA; 2005905_:AS7700000_ppm:0_mzLogicScore:NA; 2052308_:Mucochloric acid_ppm:0_mzLogicScore:NA; 82610_:3,4-Dichloro-5-hydroxy-2(5H)-furanone_ppm:0_mzLogicScore:NA		~same in all Rxes
167.964	C3 H5 O4 P S	21.856		6000000	7000000	5000000	15	0.714286	8	1	0.7	0.7	0.05	-0.44	-0.49	0.909649	0.0986129	0.0730021	0	0	0			No matches found	No matches found	No matches found	No matches found	ddMS2 for preferred ion	C3 H5 O4 P S_ppm:-1.92_Ifit:42MatchedIso.:3					~same in all Rxes
167.994	C2 H5 N2 O5 P	9.62		200000	200000	100000	20	5	4	1	0.6	0.5	0.15	-0.74	-0.89	0.673883	0.0582228	0.0338562	1	0	0			No matches found	No matches found	No matches found	No matches found	ddMS2 for preferred ion	C3 H N6 O P_ppm:-5.05_Ifit:100MatchedIso.:1; C2 H5 N2 O5 P_ppm:2.91_Ifit:100MatchedIso.:1			32995947_:1-Chloro-2,2-dinitropropane_ppm:0_mzLogicScore:NA		~same in all Rxes
168.001	C4 H9 O3 P S	2.13		1000000	700000	500000	60	128.571	60	0.5	0.4	0.7	-0.88	-1.43	-0.55	0.587443	0.785126	0.922739	10	0	0			No matches found	No matches found	No matches found	No matches found	ddMS2 for preferred ion	C6 H6 N2 P2_ppm:1.23_Ifit:100MatchedIso.:1; C4 H9 O3 P S_ppm:-1.04_Ifit:64MatchedIso.:3			67033603_:O-(3-Chloro-2-hydroxypropyl) ethanethioate_ppm:0_mzLogicScore:NA; 67035326_:5-Chloro-2-sulfanylpentanoic acid_ppm:0_mzLogicScore:NA; 465873_:Chlorocarbonyl t-butoxy sulfide_ppm:0_mzLogicScore:NA; 9052804_:Ethyl chloro(methylsulfanyl)acetate_ppm:0_mzLogicScore:NA; 19987799_:2-Chloro-4-(methylsulfanyl)butanoic acid_ppm:0_mzLogicScore:NA; 131035_:Hexafluoro-1-propanol_ppm:0_mzLogicScore:NA…		~same in all; reps don't agree well
168.042	C8 H8 O4	7.17		200000	30000	20000	50	20	25	0.2	0.1	0.7	-2.52	-3.08	-0.56	0.0610195	0.0351401	0.671166	86	0	0			No matches found	No matches found	No matches found	No matches found	ddMS2 for preferred ion	C8 H8 O4_ppm:-0.78_Ifit:100MatchedIso.:1			67154315_:Phenyl dihydroxyacetate_ppm:0_mzLogicScore:NA; 15167023_:1-Cyclohexene-1,2-dicarboxylate_ppm:0.001_mzLogicScore:NA; 67172838_:Hydroperoxy(hydroxy)phenylacetaldehyde_ppm:0_mzLogicScore:NA; 67495108_:1,6-Dioxaspiro[4.4]nona-3,7-diene-4-carboxylic acid_ppm:0_mzLogicScore:NA; 67160219_:(2Z)-4-(2-Furyl)-2-hydroxy-2-butenoic acid_ppm:0_mzLogicScore:NA; 10709152_:4-Cyclohexene-1,2-dicarboxylat…		~same in all
168.051	C3 H4 N8 O	12.956		4000000	4000000	1000000	25	7.5	100	0.9	0.3	0.4	-0.17	-1.62	-1.44	0.96858	0.134254	0.163408	4	1	0			No matches found	No matches found	No matches found	No matches found	ddMS2 for preferred ion	C3 H12 N4 S2_ppm:1.8_Ifit:33MatchedIso.:3; C3 H4 N8 O_ppm:-0.99_Ifit:35MatchedIso.:3	MJN110_simScore:70.8		61086870_:1-(Difluoromethyl)pyrrolo[1,2-a]pyrazine_ppm:-0.001_mzLogicScore:14; 2665325_:3-Methyl-5-(trifluoromethyl)-4,5-dihydro-1H-pyrazol-5-ol_ppm:0_mzLogicScore:16; 21431079_:1H-benzimidazole, 1-(difluoromethyl)-_ppm:-0.001_mzLogicScore:21; 519587_:2-(Difluoromethyl)-1H-benzimidazole_ppm:-0.001_mzLogicScore:21		~same in all Rxes
170.069	C7 H10 N2 O3	12.97		400000	300000	200000	22.5	1.33333	50	0.9	0.5	0.5	-0.12	-1.09	-0.97	0.984477	0.246038	0.285991	41	3	0			No matches found	No matches found	No matches found	No matches found	ddMS2 for preferred ion	C7 H10 N2 O3_ppm:-2.97_Ifit:96MatchedIso.:2	Ethyl 4-[(2-oxopiperidino)methyl]tetrahydropyrazine-1(2H)-carboxylate_simScore:81.9		67035456_:1,3-Diacetyl-4-imidazolidinone_ppm:0.001_mzLogicScore:21; 67035064_:Methyl 3-(2,5-dihydro-1H-imidazol-4-yl)-3-oxopropanoate_ppm:0.001_mzLogicScore:20; 65999982_:5-(2-Hydroxyethyl)-4-methoxy-2(1H)-pyrimidinone_ppm:0.001_mzLogicScore:10; 67495068_:5-Methoxy-3,6-dimethyl-2,4(1H,3H)-pyrimidinedione_ppm:0.001_mzLogicScore:20; 67497310_:3-Amino-2-(1,2-oxazol-3-ylmethyl)propanoic acid_ppm:0.00…		Highest in C, but reps don’t argee well
171.053	C7 H9 N O4	9.465		500000	1000000	400000	40	40	22.5	2	0.8	0.4	1.05	-0.36	-1.41	0.297517	0.842619	0.18007	21	1	0			No matches found	No matches found	No matches found	No matches found	ddMS2 for preferred ion	C7 H9 N O4_ppm:-2.8_Ifit:69MatchedIso.:4	Ethyl 4-[(2-oxopiperidino)methyl]tetrahydropyrazine-1(2H)-carboxylate_simScore:81.9		10670659_:2,6-Piperidinedicarboxylate_ppm:0.002_mzLogicScore:10; 20476031_:2-Amino-4,5-methanoadipate_ppm:0.002_mzLogicScore:10; 61501058_:N-[(3S)-2,6-Dioxotetrahydro-2H-pyran-3-yl]acetamide_ppm:0_mzLogicScore:11; 62805049_:3,6-Dihydroxy-4-methoxy-1-methyl-2(1H)-pyridinone_ppm:0_mzLogicScore:10; 30791684_:2-Formyloxymethylclavam_ppm:0_mzLogicScore:10; 11663579_:1,2-Piperidinedicarboxylate_ppm:0.0…		~ the same, multiple peaks
172.084	C7 H12 N2 O3	10.041		200000	100000	400000	25	40	75	0.9	2	3	-0.21	1.27	1.48	0.952954	0.379044	0.289571	20	0	0			No matches found	No matches found	No matches found	No matches found	ddMS2 for preferred ion	C7 H12 N2 O3_ppm:-2.11_Ifit:96MatchedIso.:2			67163823_:Allyl glycylglycinate_ppm:0_mzLogicScore:7; 467586_:2,5,5-Trimethyl-2,5-dihydro-1,3,4-oxadiazol-2-yl acetate_ppm:0_mzLogicScore:8; 511181_:2-(Trimethoxymethyl)-1H-imidazole_ppm:0_mzLogicScore:5; 30798929_:Ethyl 3-oxo-2-piperazinecarboxylate_ppm:0_mzLogicScore:8; 21412411_:N,N'-(2-Oxo-1,1-propanediyl)diacetamide_ppm:0_mzLogicScore:5; 103053_:1-Nitroso-2-piperidinyl acetate_ppm:0_mzLogicS…		Present in one E+ sample, weak in other; noise in C and E-
172.121	C8 H16 N2 O2	3.74		20000	60000	200000	30	1.66667	10	4	10	4	1.86	3.85	1.99	0.0172738	0.00221338	0.0153711	40	0	0			No matches found	No matches found	No matches found	No matches found	ddMS2 for preferred ion	C8 H16 N2 O2_ppm:-2.26_Ifit:80MatchedIso.:2			67160329_:N-Acetyl-L-isoleucinamide_ppm:0_mzLogicScore:18; 67160643_:2-Butyl-2-methylmalonamide_ppm:0_mzLogicScore:13; 67168548_:Octahydro-1,4-quinoxalinediol_ppm:0_mzLogicScore:18; 10466242_:1,5-Diazocan-1-ylacetic acid_ppm:0_mzLogicScore:11; 65323748_:2-Acetamido-2-ethylbutanamide_ppm:0_mzLogicScore:14; 7875887_:1-Cyclopentyl-2-propoxydiazene 1-oxide_ppm:0_mzLogicScore:9; 7876261_:Cyclohexyl(et…		Highest in E+ (low abundance), also in E-, no C peak
173.036	C6 H8 Cl N3 O	9.546		200000	400000	200000	10	22.5	20	2	1	0.5	0.95	0.06	-0.89	0.0764879	0.982494	0.0868382	2	0	0			No matches found	No matches found	No matches found	No matches found	ddMS2 for preferred ion	C5 H8 N3 O2 P_ppm:0.57_Ifit:88MatchedIso.:2; C6 H8 Cl N3 O_ppm:-0.45_Ifit:85MatchedIso.:4			512404_:2-Chloro-4-ethoxy-5-pyrimidinamine_ppm:0_mzLogicScore:29; 506133_:2-[(6-Chloro-3-pyridazinyl)amino]ethanol_ppm:0_mzLogicScore:30		~same in all Rxes
173.08	C6 H11 N3 O3	12.602		40000000	40000000	20000000	5	25	50	0.9	0.6	0.7	-0.17	-0.78	-0.62	0.916654	0.313443	0.450945	10	1	0			No matches found	No matches found	No matches found	No matches found	ddMS2 for preferred ion	C6 H11 N3 O3_ppm:-2.22_Ifit:72MatchedIso.:5	Nicotinaldehyde N-(6,7-dihydro-5H-cyclopenta[d][1,2,4]triazolo[1,5-a]pyrimidin-8-yl)hydrazone_simScore:65.8		65793907_:N-Carbamimidoyl-3-oxonorvaline_ppm:0_mzLogicScore:NA; 4515563_:2-Hydroxy-N'-[(2E)-3-nitroso-2-buten-2-yl]acetohydrazide_ppm:0_mzLogicScore:NA; 474815_:Methyl 1-methyl-3-(methylcarbamoyl)-3-diaziridinecarboxylate_ppm:0_mzLogicScore:NA; 168628_:N-Carbamimidoyl-N-(2-oxiranylmethyl)glycine_ppm:0_mzLogicScore:NA; 498917_:1-Carbamimidoyl-4-hydroxyproline_ppm:0_mzLogicScore:NA; 135756_:1-Ethyl…		~same in all; reps don't agree well
173.116	C7 H15 N3 O2	10.254		40000	50000	200000	17.5	8	25	1	4	3	0.1	1.89	1.79	0.940349	0.018345	0.0215112	20	0	0			No matches found	No matches found	No matches found	No matches found	ddMS2 for preferred ion	C7 H15 N3 O2_ppm:-2.39_Ifit:82MatchedIso.:2			19985450_:Nitroso-n-hexylurea_ppm:0_mzLogicScore:NA; 67026605_:1-(6-Nitrosohexyl)urea_ppm:0_mzLogicScore:NA; 67174062_:2-Acetoxy-1,1,3,3-tetramethylguanidine_ppm:0_mzLogicScore:NA; 67177895_:(2S)-2,5-Diamino-7-iminoheptanoic acid_ppm:0_mzLogicScore:NA; 67164803_:1-(1-Nitrosopropyl)-1-propylurea_ppm:0_mzLogicScore:NA; 35031650_:(2S)-6-Amino-2-[(E)-(hydroxymethylene)amino]hexanimidic acid_ppm:0_mzL…		Highest in E+, maybe present in other Rxes as well
174.1	C7 H14 N2 O3	11.725		30000	70000	300000	66.6667	0.428571	30	3	10	4	1.4	3.27	1.87	0.201647	0.0331843	0.155419	45	1	0			No matches found	No matches found	No matches found	No matches found	ddMS2 for preferred ion	C7 H14 N2 O3_ppm:-2.47_Ifit:91MatchedIso.:2	Netilmicin_simScore:81.9		58837229_:N-[(2S)-2-Pyrrolidinylmethoxy]glycine_ppm:0_mzLogicScore:26; 67026614_:N,N,4,4-Tetramethyl-1,3,2-dioxazolidine-2-carboxamide_ppm:0_mzLogicScore:13; 67491468_:N-Carbamoyl-D-isoleucine_ppm:0_mzLogicScore:43; 13600398_:N~2~-Formyllysine_ppm:0_mzLogicScore:43; 65791819_:(2S)-2,5-Diamino-6-oxoheptanoic acid_ppm:0_mzLogicScore:38; 19993991_:N-(4,5-Dihydroxy-3-piperidinyl)acetamide_ppm:0_mzLog…		Only in E+ and E-
175.03	C6 H9 N O3 S	6.879		50000	90000	400000	80	55.5556	75	2	8	4	0.77	2.93	2.15	0.773931	0.182735	0.342517	7	0	0			No matches found	No matches found	No matches found	No matches found	ddMS2 for preferred ion	C8 H6 N3 P_ppm:-0.4_Ifit:66MatchedIso.:2; C6 H9 N O3 S_ppm:-2.57_Ifit:78MatchedIso.:4			67039021_:(2-Hydroxy-4-methyl-2,3-dihydro-1,3-thiazol-2-yl)acetic acid_ppm:0_mzLogicScore:15; 67171324_:2,4,5-Trimethyl-1,2-thiazol-3(2H)-one 1,1-dioxide_ppm:0_mzLogicScore:14; 48458862_:3-(2-Hydroxypropyl)-1,3-thiazolidine-2,4-dione_ppm:0_mzLogicScore:16; 9564600_:3-Acetyl-1,3-thiazolidine-2-carboxylic acid_ppm:0_mzLogicScore:15; 26469055_:3-Ethoxy-2-(methylsulfonyl)acrylonitrile_ppm:0_mzLogicSc…		Highest in E+, reps don't agree well
175.048	C6 H9 N O5	13.644		400000	200000	200000	75	45	40	0.6	0.5	0.9	-0.65	-0.88	-0.23	0.877	0.739502	0.958192	22	0	0			No matches found	No matches found	No matches found	No matches found	ddMS2 for preferred ion	C6 H9 N O5_ppm:-2.45_Ifit:73MatchedIso.:4			10733615_:2,2'-[(2-Hydroxyethyl)imino]diacetate_ppm:0.002_mzLogicScore:29; 67024671_:Hydroxy[(2R,3S,4R,5R)-3,4,5-trihydroxytetrahydro-2-furanyl]acetonitrile (non-preferred name)_ppm:0_mzLogicScore:22; 66424097_:3-Acetyl-L-aspartic acid_ppm:0_mzLogicScore:38; 13634414_:N-(Carboxyacetyl)alanine_ppm:0_mzLogicScore:38; 62916375_:O-Pyruvoyl-L-serine_ppm:0_mzLogicScore:24; 61394081_:(5R)-5-[(1S)-2-Amin…		~same in all; one C rep up
175.132	C7 H17 N3 O2	9.657		60000	200000	2000000	16.6667	30	3.5	4	30	8	1.89	4.86	2.97	0.0159457	0.00104156	0.0041979	3	5	0			No matches found	No matches found	No matches found	No matches found	ddMS2 for preferred ion	C7 H17 N3 O2_ppm:-2.55_Ifit:76MatchedIso.:3	Carbetamide_simScore:96.3; Bicine_simScore:96.8; 5-Aminovaleric acid_score:96.9; Betaine_score:98.8; Valine_score:99.1		30791495_:2-Amino-4-[(3-aminopropyl)amino]butanoic acid_ppm:0_mzLogicScore:23; 67158522_:3,3,4-Triaminoheptanoic acid_ppm:0_mzLogicScore:17; 7833827_:N-Ethyl-N-[(Z)-propoxy-NNO-azoxy]ethanamine_ppm:0_mzLogicScore:23		highest in E+, looks like it's there in E-, maybe there in C as well
175.868		22.175		900000	600000	300000	11.1111	16.6667	16.6667	0.7	0.3	0.5	-0.44	-1.53	-1.09	0.256768	0.0124261	0.0319607	0	0	0			No matches found	No matches found	No matches found	No matches found	ddMS2 for preferred ion						~same in all Rxes
176.105	C8 H16 O4	6.866		400000	200000	200000	2.5	10	15	0.4	0.6	1	-1.25	-0.82	0.42	0.00872184	0.0276071	0.148215	27	0	0			No matches found	No matches found	No matches found	No matches found	ddMS2 for preferred ion	C8 H16 O4_ppm:-0.92_Ifit:80MatchedIso.:2			11539429_:4-(1,2-Dihydroxyethyl)-1,2-cyclohexanediol_ppm:0_mzLogicScore:59; 65793135_:2,6-Dideoxy-1-C-methyl-3-O-methyl-L-arabino-hexopyranose_ppm:0_mzLogicScore:51; 67176379_:(3R)-5,5-Dimethoxy-3-methylpentanoic acid_ppm:0_mzLogicScore:58; 67497041_:5-Methoxy-2-pentanyl methyl carbonate_ppm:0_mzLogicScore:42; 67158147_:2,2-Bis(hydroxymethyl)-5-hexene-1,3-diol_ppm:0_mzLogicScore:52; 67168008_:Met…		~same in all Rxes
177.051	C4 H3 N9	12.702		2000000	2000000	1000000	45	2.5	70	1	0.5	0.6	-0.04	-0.89	-0.85	0.998089	0.452707	0.429476	2	0	0			No matches found	No matches found	No matches found	No matches found	ddMS2 for preferred ion	C4 H3 N9_ppm:-1.2_Ifit:39MatchedIso.:2			67170825_:N-(1,2,3,4-Tetrazin-5-yl)-1,2,3,4-tetrazin-5-amine_ppm:0_mzLogicScore:NA; 67171353_:N-(1,2,4,5-Tetrazin-3-yl)-1,2,4,5-tetrazin-3-amine_ppm:0_mzLogicScore:NA		~same in all
177.063	C6 H11 N O5	11.7		800000	1000000	1000000	75	2	0.6	2	1	0.7	0.78	0.35	-0.43	0.443084	0.713138	0.843151	12	0	0			No matches found	No matches found	No matches found	No matches found	ddMS2 for preferred ion	C6 H11 N O5_ppm:-2.55_Ifit:94MatchedIso.:3			67172629_:(3S,4S,5R)-2-[(E)-(Oxido-lambda~5~-azanylidene)methyl]tetrahydro-2H-pyran-3,4,5-triol (non-preferred name)_ppm:0_mzLogicScore:30; 67176991_:N-(Carboxymethyl)threonine_ppm:0_mzLogicScore:32; 67161085_:[2-(2-Amino-2-oxoethoxy)ethoxy]acetic acid_ppm:0_mzLogicScore:26; 67164297_:2-(Carboxymethoxy)-N-methylalanine_ppm:0_mzLogicScore:29; 57558138_:(2S)-2,2'-(Hydroxyimino)dipropanoic acid (non…		~same in all
177.978	C3 H3 N2 O5 P	9.589		800000	1000000	600000	25	60	3.33333	2	0.7	0.5	0.68	-0.44	-1.11	0.399122	0.60426	0.15963	0	0	0			No matches found	No matches found	No matches found	No matches found	ddMS2 for preferred ion	C4 H7 N2 P S2_ppm:-1.87_Ifit:41MatchedIso.:2; C3 H3 N2 O5 P_ppm:3.01_Ifit:58MatchedIso.:2					~same in all Rxes
179.044	C6 H5 N5 O2	12.212		40000	10000	100000	22.5	20	40	0.3	3	10	-1.83	1.49	3.31	0.0344894	0.0618513	0.00664795	16	4	0	88.6		No matches found	No matches found	No matches found	No matches found	ddMS2 for preferred ion	C5 H9 N O6_ppm:4.77_Ifit:68MatchedIso.:2; C6 H5 N5 O2_ppm:-2.7_Ifit:62MatchedIso.:2	Xanthopterin_score:88.4; Isoxanthopterin_score:88.6		67030789_:5-Methylpyrimido[4,5-e][1,2,4]triazine-6,8(5H,7H)-dione_ppm:0_mzLogicScore:23; 65792599_:2-(Hydroxyamino)-4(3H)-pteridinone_ppm:0_mzLogicScore:31; 67176224_:1,2,3,3-Tetrahydroxy-L-proline_ppm:-0.001_mzLogicScore:24; 67174911_:2-Amino-6-oxo-6,7-dihydro-3H-purine-3-carbaldehyde_ppm:0_mzLogicScore:55; 67166957_:2-Amino-1-methyl-1H-purine-6,8-dione_ppm:0_mzLogicScore:36; 29435943_:2-Amino-4…		Highest in E+, but also present in C (E+ > C > E-)
179.058	C9 H9 N O3	6.863		300000	200000	100000	1	100	0.9	0.6	0.4	0.6	-0.64	-1.37	-0.74	0.530041	0.315942	0.840441	76	0	0			No matches found	No matches found	No matches found	No matches found	ddMS2 for preferred ion	C3 H10 N5 O2 P_ppm:4.85_Ifit:100MatchedIso.:1; C9 H9 N O3_ppm:-0.91_Ifit:80MatchedIso.:2			67033247_:4-Phenoxy-1,2-oxazolidin-3-one_ppm:0_mzLogicScore:24; 67154575_:4-Oxo-2-(3-pyridinyl)butanoic acid_ppm:0_mzLogicScore:23; 67035026_:1,5-Dihydro-2H-pyrano[4,3-b]pyridine-3-carboxylic acid_ppm:0_mzLogicScore:16; 67037324_:3-Nitroso-3-phenylpropanoic acid_ppm:0_mzLogicScore:29; 58838027_:4-(6-Hydroxy-3-pyridinyl)-4-oxobutanal_ppm:0_mzLogicScore:27; 67175174_:2-Amino-7-methyl-4H,5H-pyrano[4…		~same in all; reps don't agree well
179.079	C6 H13 N O5	11.295		200000	400000	1000000	40	5	80	3	7	2	1.47	2.77	1.3	0.265915	0.0884327	0.461597	47	28	0			No matches found	No matches found	No matches found	No matches found	ddMS2 for preferred ion	C6 H13 N O5_ppm:-3.8_Ifit:90MatchedIso.:2	Melezitose_simScore:93.4; (3β,5ξ,9ξ,16α,18ξ)-16-Hydroxy-13,28-epoxyoleanan-3-yl 6-deoxy-α-L-mannopyranosyl-(1->2)-β-D-galactopyranosyl-(1->3)-[β-D-glucopyranosyl-(1->2)]-β-D-glucopyranosiduronic acid_simScore:93.7; Linustatin_simScore:94.9; (R)-Prunasin_simScore:96.4; α-Cyclodextrin_simScore:96.5; Octyl glucoside_simScore:97.1; D(-)-Amygdalin_simScore:97.6; Maltotriose_simScore:97.7; Stevioside_s…		67175424_:(2S,3R,4R,5S)-2,3,4,5-Tetrahydroxyhexanamide (non-preferred name)_ppm:0.001_mzLogicScore:49; 67155095_:1-({[1,3-Dihydroxy-2-(hydroxymethyl)-2-propanyl]amino}oxy)ethanone_ppm:0.001_mzLogicScore:22; 62917630_:(2R,3R,4R,5S)-6-Imino-1,2,3,4,5-hexanepentol (non-preferred name)_ppm:0.001_mzLogicScore:54; 62990008_:3-Amino-3-deoxy-D-altrose_ppm:0.001_mzLogicScore:49; 62990224_:(1E,2R,3S,4R,5S)…		Highest in E+, present in all
179.079	C6 H13 N O5	12.467		1000000	800000	600000	30	25	13.3333	0.8	0.6	0.7	-0.41	-0.86	-0.44	0.606426	0.223848	0.564308	47	9	0			No matches found	No matches found	No matches found	No matches found	ddMS2 for preferred ion	C6 H13 N O5_ppm:-2.73_Ifit:84MatchedIso.:2	CP 24,879_simScore:63; N-(1-Adamantylcarbonyl)-N'-allylurea_simScore:63.1; Homo-anatoxin_simScore:63.2; (R)-Prunasin_simScore:96.4; Amygdalin_simScore:96.9; D(-)-Amygdalin_simScore:97.6; Xanthopterin_score:88.4; Isoxanthopterin_score:88.6; D-(+)-Glucose_score:97.3		67175424_:(2S,3R,4R,5S)-2,3,4,5-Tetrahydroxyhexanamide (non-preferred name)_ppm:0_mzLogicScore:47; 67155095_:1-({[1,3-Dihydroxy-2-(hydroxymethyl)-2-propanyl]amino}oxy)ethanone_ppm:0_mzLogicScore:27; 62917630_:(2R,3R,4R,5S)-6-Imino-1,2,3,4,5-hexanepentol (non-preferred name)_ppm:0_mzLogicScore:43; 62990008_:3-Amino-3-deoxy-D-altrose_ppm:0_mzLogicScore:46; 62990224_:(1E,2R,3S,4R,5S)-1-(Hydroxyimino…		~same in all
179.079	C6 H13 N O5	9.654		20000	70000	400000	25	1.42857	25	4	20	6	2.05	4.57	2.52	0.0243527	0.00259079	0.0150239	47	0	0			No matches found	No matches found	No matches found	No matches found	ddMS2 for preferred ion	C6 H13 N O5_ppm:-1.1_Ifit:91MatchedIso.:2			67175424_:(2S,3R,4R,5S)-2,3,4,5-Tetrahydroxyhexanamide (non-preferred name)_ppm:0_mzLogicScore:27; 67155095_:1-({[1,3-Dihydroxy-2-(hydroxymethyl)-2-propanyl]amino}oxy)ethanone_ppm:0_mzLogicScore:27; 62917630_:(2R,3R,4R,5S)-6-Imino-1,2,3,4,5-hexanepentol (non-preferred name)_ppm:0_mzLogicScore:21; 62990008_:3-Amino-3-deoxy-D-altrose_ppm:0_mzLogicScore:27; 62990224_:(1E,2R,3S,4R,5S)-1-(Hydroxyimino…		Highest in E+, probably present in E-, probably not present in C
179.08	C6 H13 N O5	7.502		200000	200000	1000000	20	10	60	0.6	4	7	-0.63	2.13	2.76	0.524258	0.0596906	0.0292841	83	1	0	67.1		No matches found	No matches found	No matches found	No matches found	ddMS2 for preferred ion	C6 H13 N O5_ppm:4.85_Ifit:79MatchedIso.:3; C7 H9 N5 O_ppm:-2.62_Ifit:76MatchedIso.:4	Kanosamine_score:67.1		58838095_:2-(6-Amino-1H-purin-1-yl)ethanol_ppm:0_mzLogicScore:26; 67025304_:(2Z)-2-[(6E)-6-(Hydroxyimino)-2,4-cyclohexadien-1-ylidene]hydrazinecarboximidamide_ppm:0_mzLogicScore:21; 67025811_:2-(Methyleneamino)-5,6,7,8-tetrahydro-4(3H)-pteridinone_ppm:0_mzLogicScore:20; 66424201_:N-Methyl-N-(7H-purin-2-yloxy)methanamine_ppm:0_mzLogicScore:17; 67175424_:(2S,3R,4R,5S)-2,3,4,5-Tetrahydroxyhexanamide…		Highest in E+, present in E- and C as well
179.094	C4 H14 N5 O P	7.769		200000	100000	100000	10	60	50	0.6	0.5	0.8	-0.64	-1.02	-0.38	0.564722	0.311822	0.796828	215	0	0			No matches found	No matches found	No matches found	No matches found	ddMS2 for preferred ion	C10 H13 N O2_ppm:-2.64_Ifit:56MatchedIso.:2; C4 H14 N5 O P_ppm:3.12_Ifit:48MatchedIso.:2			631893_:N-Benzyl-L-alanine_ppm:0_mzLogicScore:NA; 507647_:Ethyl 5,6-Dimethylnicotinate_ppm:0_mzLogicScore:NA; 387104_:Benzyl alaninate_ppm:0_mzLogicScore:NA; 77780_:2-Hydroxy-2-phenylbutanamide_ppm:0_mzLogicScore:NA; 20395_:Propyl phenylcarbamate_ppm:0_mzLogicScore:NA; 81145_:N-(4-Hydroxy-3,5-dimethylphenyl)acetamide_ppm:0_mzLogicScore:NA; 634719_:Benzyl L-alaninate_ppm:0_mzLogicScore:NA; 460241_…		~same in all
179.974	C4 H6 O4 P2	9.581		400000	500000	300000	22.5	20	10	1	0.7	0.5	0.41	-0.45	-0.87	0.396085	0.368907	0.101875	8	0	0			No matches found	No matches found	No matches found	No matches found	ddMS2 for preferred ion	C4 H6 O4 P2_ppm:-1.25_Ifit:63MatchedIso.:2			58837608_:(1R,2R)-3,5-Dichloro-3,5-cyclohexadiene-1,2-diol_ppm:0.001_mzLogicScore:NA; 58837610_:(1R,2S)-4,5-Dichloro-3,5-cyclohexadiene-1,2-diol_ppm:0.001_mzLogicScore:NA; 58837736_:3,4-Dichloro-3,5-cyclohexadiene-1,2-diol_ppm:0.001_mzLogicScore:NA; 10743937_:2,2'-Sulfanediylbis(hydroxyacetate)_ppm:0_mzLogicScore:NA; 462669_:3-Butyn-2-yl dichloroacetate_ppm:0.001_mzLogicScore:NA; 7822068_:3,6-dic…		~same in all Rxes
181.096	C7 H11 N5 O	8.956		400000	2000000	5000000	50	35	12	4	10	3	2.03	3.6	1.58	0.0782368	0.016501	0.132449	13	8	0			No matches found	No matches found	No matches found	No matches found	ddMS2 for preferred ion	C6 H15 N O5_ppm:4.95_Ifit:63MatchedIso.:3; C7 H11 N5 O_ppm:-2.43_Ifit:85MatchedIso.:3	Trimethoprim impurity B_simScore:97.5; Inosine-5'-monophosphate (IMP)_simScore:98.4; 2',3'-Dideoxyinosine_simScore:98.4; 4-Amino-N'-hydroxypyrimidine-5-carboximidamide_simScore:98.6; 2'-Deoxyinosine_score:78; Inosine_score:99.6; Allopurinol_score:99.7; Hypoxanthine_score:99.9		67492315_:5,6,7,8-Tetrahydroimidazo[1,2-a]pyrimidine-2-carbohydrazide_ppm:0_mzLogicScore:40; 20169994_:3,7-dimethylguanine_ppm:0_mzLogicScore:45; 523537_:8-Methyl-2-(methylamino)-7,8-dihydroimidazo[1,2-a][1,3,5]triazin-4(6H)-one_ppm:0_mzLogicScore:40; 9107281_:2-(methylamino)-5,6,7,8-tetrahydropteridin-4-ol_ppm:0_mzLogicScore:40; 24215404_:2-amino-6-methyl-1,2,3,4-tetrahydropteridin-4-ol_ppm:0_mz…		Highest in E+, present in all 3
182.116	C8 H14 N4 O	14.011		400000	400000	300000	22.5	10	26.6667	1	0.9	0.9	0.04	-0.14	-0.18	0.979611	0.901668	0.812971	10	8	0			No matches found	No matches found	No matches found	No matches found	ddMS2 for preferred ion	C8 H14 N4 O_ppm:-2.38_Ifit:82MatchedIso.:2	Bisacodyl_simScore:94.5; 1-Benzyl-3-[(benzylimino)(2-furyl)methyl]-6-(2-furyl)-1,2,3,4-tetrahydro-1,3,5-triazine-2,4-dithione_simScore:95.1; 3-[(4-Bromoanilino)methylidene]pentane-2,4-dione_simScore:95.1; Bumetanide_simScore:95.1; 5-(5-Amino-1-phenyl-1H-pyrazol-4-yl)-4-(2,4-dichlorophenyl)-2,4-dihydro-3H-1,2,4-triazole-3-thione_simScore:95.2; DL-Dipalmitoylphosphatidylcholine_simScore:97.4; Palmi…		67159797_:(2S)-2-Amino-1-[5-(2-aminoethyl)-1H-imidazol-1-yl]-1-propanone_ppm:0_mzLogicScore:27; 61050585_:5-(1-Methyl-2-piperidinyl)-1,2,4-oxadiazol-3-amine_ppm:0_mzLogicScore:28; 479062_:4-(4-Methyl-1-piperazinyl)-1,5-dihydro-2H-imidazol-2-one_ppm:0_mzLogicScore:22; 17283646_:2-{[(4-Amino-2-methyl-5-pyrimidinyl)methyl]amino}ethanol_ppm:0_mzLogicScore:23; 510676_:6-Amino-5-(butylamino)-4(1H)-pyri…		~same in all
182.921		9.589		200000	300000	100000	50	33.3333	20	1	0.6	0.5	0.09	-0.79	-0.88	0.971698	0.512757	0.418423	2	0	0			No matches found	No matches found	No matches found	No matches found	No MS2				58181409_:1,3-Thiazole-5-sulfonyl chloride_ppm:0.001_mzLogicScore:NA; 8758987_:1,3-Thiazole-4-sulfonyl chloride_ppm:0.001_mzLogicScore:NA		~same in all
182.985	C4 H7 Cl N O3 P	9.563		200000	200000	100000	20	25	10	1	0.7	0.5	0.33	-0.56	-0.9	0.560155	0.31407	0.120035	4	0	0			No matches found	No matches found	No matches found	No matches found	ddMS2 for preferred ion	C3 H7 N O4 P2_ppm:-0.9_Ifit:100MatchedIso.:1; C4 H7 Cl N O3 P_ppm:-1.87_Ifit:53MatchedIso.:2			67033955_:(1Z)-N-[(Chlorocarbonyl)oxy]butanimidoyl chloride_ppm:0.001_mzLogicScore:NA; 66738683_:1,2-Dichloroproline_ppm:0.001_mzLogicScore:NA; 8550554_:5-(dichloromethyl)-3-methyl-4,5-dihydroisoxazol-5-ol_ppm:0.001_mzLogicScore:NA; 246741_:4,4-Bis(chloromethyl)-1,3-oxazolidin-2-one_ppm:0.001_mzLogicScore:NA		~same in all Rxes
183.066	C5 H14 N O4 P	13.75		20000000	5000000	3000000	100	6	100	0.2	0.2	0.7	-2.06	-2.67	-0.61	0.599857	0.307445	0.751824	1	8	0			No matches found	No matches found	No matches found	No matches found	ddMS2 for preferred ion	C5 H14 N O4 P_ppm:-2.26_Ifit:79MatchedIso.:4	Bisacodyl_simScore:94.5; 1-Benzyl-3-[(benzylimino)(2-furyl)methyl]-6-(2-furyl)-1,2,3,4-tetrahydro-1,3,5-triazine-2,4-dithione_simScore:95.1; 3-[(4-Bromoanilino)methylidene]pentane-2,4-dione_simScore:95.1; Bumetanide_simScore:95.1; 5-(5-Amino-1-phenyl-1H-pyrazol-4-yl)-4-(2,4-dichlorophenyl)-2,4-dihydro-3H-1,2,4-triazole-3-thione_simScore:95.2; DL-Dipalmitoylphosphatidylcholine_simScore:97.4; Palmi…		119298_:Phosphocholine_ppm:0_mzLogicScore:44		~same in all; up in one C rep
183.1	C8 H13 N3 O2	10.61		20000	3000000	10000000	45	30	60	100	600	4	7.13	9.15	2.02	0.00211668	0.00106069	0.0747977	19	4	0			No matches found	No matches found	No matches found	No matches found	ddMS2 for preferred ion	C8 H13 N3 O2_ppm:-2.5_Ifit:54MatchedIso.:4	N'-Cyclohexylidenaminomethanehydrazonamide_simScore:71.7; Zolazepam_simScore:72.1; 5-[3-(1H-Imidazol-1-yl)propyl]-1,3,5-triazinane-2-thione_simScore:72.3; 1,3-Dimethyl-N-(3-morpholinopropyl)-4-nitro-1H-pyrazol-5-amine_simScore:74.9		66425131_:2-[4-(2-Aminoethyl)-1H-imidazol-1-yl]propanoic acid_ppm:0_mzLogicScore:22; 67162728_:N-Butyl-N-carbamoyl-2-cyanoacetamide_ppm:0_mzLogicScore:19; 67157637_:1-Amino-3-butyl-2,4(1H,3H)-pyrimidinedione_ppm:0_mzLogicScore:22; 44256634_:2-[(4-Methoxy-6-methyl-2-pyrimidinyl)amino]ethanol_ppm:0_mzLogicScore:10; 21379179_:1-oxa-2,8-diazaspiro(4.5)dec-2-ene-7-carboxamide_ppm:0_mzLogicScore:13; 66…		Only in E+ and E-, much higher in E+
183.1	C8 H13 N3 O2	9.841		30000	600000	2000000	3.33333	0.833333	40	20	80	4	4.57	6.4	1.83	0.00148348	0.000594376	0.0220398	19	0	0			No matches found	No matches found	No matches found	No matches found	ddMS2 for preferred ion	C8 H13 N3 O2_ppm:-2.11_Ifit:97MatchedIso.:2			66425131_:2-[4-(2-Aminoethyl)-1H-imidazol-1-yl]propanoic acid_ppm:0_mzLogicScore:22; 67162728_:N-Butyl-N-carbamoyl-2-cyanoacetamide_ppm:0_mzLogicScore:19; 67157637_:1-Amino-3-butyl-2,4(1H,3H)-pyrimidinedione_ppm:0_mzLogicScore:22; 44256634_:2-[(4-Methoxy-6-methyl-2-pyrimidinyl)amino]ethanol_ppm:0_mzLogicScore:9; 21379179_:1-oxa-2,8-diazaspiro(4.5)dec-2-ene-7-carboxamide_ppm:0_mzLogicScore:12; 660…		Only in E+ and E-
183.125	C10 H17 N O2	12.04		60000	20000	200000	10	20	25	0.4	3	8	-1.4	1.66	3.06	0.0416846	0.0280389	0.00481815	44	1	0	73.9		No matches found	No matches found	No matches found	No matches found	ddMS2 for preferred ion	C10 H17 N O2_ppm:-2.23_Ifit:87MatchedIso.:2	Methyprylon_score:73.9		67029475_:{[4-(2-Furyl)-2-methyl-2-butanyl]amino}methanol_ppm:0_mzLogicScore:31; 67174329_:3,3,6-Trimethyl-4,5,6,7-tetrahydro-2,1-benzoxazol-3a(3H)-ol_ppm:0_mzLogicScore:31; 67176970_:(4S)-4-(Hydroxyamino)-4,7,7-trimethylbicyclo[4.1.0]heptan-3-one_ppm:0_mzLogicScore:36; 67497954_:(3E)-4-Methyl-5-(4-morpholinyl)-3-penten-2-one_ppm:0_mzLogicScore:35; 4934724_:(1R)-1-Methoxy-7-(methoxymethyl)-2,3,5,…		low abundance, most in E+, looks like real peak in C (E+ > C > E-)
183.912		22.002		300000	300000	200000	6.66667	1.33333	20	0.9	0.7	0.7	-0.09	-0.55	-0.46	0.816631	0.0638718	0.0992334	1	16	0			No matches found	No matches found	No matches found	No matches found	ddMS2 for preferred ion		Sulfoaildenafil_simScore:62.5; Thiohomo sildenafil_simScore:62.6; Sildenafil analogue III_simScore:63.6; Thiodimethyl sildenafil_simScore:63.6; Thiomethisosildenafil_simScore:63.9; Sildenafil analogue_simScore:64.7; Dimethylsildenafil_simScore:64.7; Thioproperazine_simScore:64.9; Trifluoperazine_simScore:65.9; 7-[2-Hydroxy-3-(4-methylpiperazino)propyl]-1,3-dimethyl-8-morpholino-2,3,6,7-tetrahydro…		13225_:Bromo(dinitro)methane_ppm:0_mzLogicScore:9		~same in all Rxes
183.938		22.086		1000000	1000000	700000	20	1	1	1	0.8	0.6	0.33	-0.38	-0.71	0.190976	0.155684	0.0320855	2	0	0			No matches found	No matches found	No matches found	No matches found	ddMS2 for preferred ion				144381_:2-(Iodomethyl)oxirane_ppm:0_mzLogicScore:NA; 68871_:iodoacetone_ppm:0_mzLogicScore:NA		~same in all Rxes
185.152	C9 H19 N3 O	9.965		100000	30000	40000	80	33.3333	50	0.3	0.4	1	-1.69	-1.3	0.39	0.421567	0.588108	0.924606	8	4	0			No matches found	No matches found	No matches found	No matches found	ddMS2 for preferred ion	C9 H19 N3 O_ppm:-2.36_Ifit:75MatchedIso.:2	Didecyldimethylammonium_simScore:72.2; Dodecylamine_score:79.2; Nonyltrimethylammonium_score:89.8; Tributylamine_score:90		66424692_:(2E)-1-(1,3-Dimethyl-2-triazanyl)-2-methyl-2-hexen-1-one_ppm:0_mzLogicScore:10; 32852484_:(2E)-2-Octylidenehydrazinecarboxamide_ppm:0_mzLogicScore:10; 499477_:N'-Isopropyl-4-piperidinecarbohydrazide_ppm:0_mzLogicScore:20; 18866905_:2,2-Dimethyl-3-[(2R)-2-piperazinyl]propanamide_ppm:0_mzLogicScore:20; 4886461_:(1Z)-3-(1-Azepanyl)-N'-hydroxypropanimidamide_ppm:0_mzLogicScore:30; 11202036_…		~same in all; one C rep up
185.214	C12 H27 N	9.855		200000	200000	200000	5	50	5	0.8	0.7	0.8	-0.28	-0.52	-0.24	0.707065	0.552464	0.949615	12	6	0	90		No matches found	No matches found	No matches found	No matches found	ddMS2 for preferred ion	C12 H27 N_ppm:-2.91_Ifit:89MatchedIso.:2	Dodecylamine_score:79.2; Nonyltrimethylammonium_score:89.8; Tributylamine_score:90		516013_:N,3-Diethyl-3-octanamine_ppm:0.001_mzLogicScore:19; 493786_:N-Ethyl-3-methyl-3-nonanamine_ppm:0.001_mzLogicScore:19; 505843_:N,4-Diethyl-4-octanamine_ppm:0.001_mzLogicScore:19; 459378_:N-Ethyl-N-pentyl-1-pentanamine_ppm:0.001_mzLogicScore:32; 499959_:4-Methyl-N-(4-methylpentyl)-1-pentanamine_ppm:0.001_mzLogicScore:26; 202097_:N-Methyl-1-undecanamine_ppm:0.001_mzLogicScore:16; 499928_:N,N-…		~same in all
185.975	C3 H7 O5 P S	21.811		8000000	8000000	6000000	12.5	1.25	8.33333	1	0.7	0.7	0.02	-0.44	-0.47	0.975201	0.0898948	0.0771901	10	0	0			No matches found	No matches found	No matches found	No matches found	ddMS2 for preferred ion	C3 H7 O5 P S_ppm:-2.09_Ifit:31MatchedIso.:3			14083118_:1,2-Dichloro-1H-benzimidazole_ppm:0_mzLogicScore:NA; 478383_:Bis(trifluoromethyl)trioxidane_ppm:0_mzLogicScore:NA; 525285_:3,4-dichlorophenylcyanamide_ppm:0_mzLogicScore:NA; 10447910_:3,5-dichlorophenylcyanamide_ppm:0_mzLogicScore:NA; 23978110_:2,4-Dichloro-1H-benzimidazole_ppm:0_mzLogicScore:NA; 15394438_:5,7-Dichloro-1H-indazole_ppm:0_mzLogicScore:NA; 4514040_:4,6-Dichloro-1H-pyrrolo[…		~same in all Rxes
186.029	C5 H11 Cl O5	9.511		300000	100000	500000	133.333	20	80	0.4	2	5	-1.29	0.91	2.2	0.857902	0.575213	0.848394	1	0	0			No matches found	No matches found	No matches found	No matches found	ddMS2 for preferred ion	C7 H10 N2 S2_ppm:4.23_Ifit:39MatchedIso.:2; C7 H2 N6 O_ppm:1.71_Ifit:39MatchedIso.:2; C4 H11 O6 P_ppm:0.01_Ifit:71MatchedIso.:2; C5 H11 Cl O5_ppm:-0.94_Ifit:54MatchedIso.:4			67038564_:(1xi)-1-C-Chloro-D-xylitol_ppm:0_mzLogicScore:27		Reps all over the place; up in C and E+ but not E-?
186.064	C7 H10 N2 O4	7.338		800000	500000	80000	37.5	6	37.5	0.6	0.1	0.2	-0.63	-3.21	-2.58	0.530738	0.0131583	0.0225811	22	0	0			No matches found	No matches found	No matches found	No matches found	ddMS2 for preferred ion	C7 H10 N2 O4_ppm:-1.06_Ifit:73MatchedIso.:2			67490630_:3-(5-Hydroxy-4-methyl-1,2-oxazol-3-yl)alanine_ppm:0_mzLogicScore:28; 67165381_:3-(2-Amino-5-methyl-3-oxo-2,3-dihydro-1,2-oxazol-4-yl)propanoic acid_ppm:0_mzLogicScore:28; 50076450_:3-(2,3-Dihydroxypropyl)-2,4(1H,3H)-pyrimidinedione_ppm:0_mzLogicScore:19; 20476307_:pyroglutamylglycine_ppm:0_mzLogicScore:28; 65793769_:3-(4-Amino-3-hydroxy-1,2-oxazol-5-yl)-2-methylpropanoic acid_ppm:0_mzLo…		Highest in C and E-, present but low in E+. Messy!
186.1	C8 H14 N2 O3	9.806		40000	100000	600000	50	30	50	3	10	4	1.77	3.73	1.96	0.170027	0.033041	0.182592	23	0	0			No matches found	No matches found	No matches found	No matches found	ddMS2 for preferred ion	C8 H14 N2 O3_ppm:-2.5_Ifit:59MatchedIso.:4			67030423_:2,2,3,3-Tetramethyl-1-nitrocyclopropanecarboxamide_ppm:0_mzLogicScore:NA; 67030475_:N-Hydroxy-4-isobutyl-4,5-dihydro-1,3-oxazole-4-carboxamide_ppm:0_mzLogicScore:NA; 67038574_:L-Prolylalanine_ppm:0_mzLogicScore:NA; 66424272_:N-(Ethoxycarbonyl)-L-prolinamide_ppm:0_mzLogicScore:NA; 61491181_:Ethyl 4-methyl-2-oxohexahydro-5-pyrimidinecarboxylate_ppm:0_mzLogicScore:NA; 471561_:(1-Methyl-6-o…		High in E+, present in all 3
186.125	C10 H18 O3	2.77		10000000	2000000	200000	50	4.5	35	0.1	0.02	0.2	-2.91	-5.58	-2.67	0.0127108	0.00186571	0.0149745	146	0	0			No matches found	No matches found	No matches found	No matches found	ddMS2 for preferred ion	C10 H18 O3_ppm:-0.62_Ifit:98MatchedIso.:2			163936_:1,3,3-Trimethyl-2-oxabicyclo[2.2.2]octane-4,6-diol_ppm:0_mzLogicScore:30; 391463_:(5S)-6-Hydroxy-5-isopropenyl-2-methylhexanoate_ppm:0_mzLogicScore:25; 391458_:(3S)-6-Hydroxy-3-isopropenyl-heptanoate_ppm:0_mzLogicScore:29; 391447_:(5R)-6-Hydroxy-5-isopropenyl-2-methylhexanoate_ppm:0_mzLogicScore:25; 391443_:(3R)-6-Hydroxy-3-isopropenyl-heptanoate_ppm:0_mzLogicScore:29; 468448_:2,2,4-Trime…		Highest in C, present in E-, probably not in E+
187.027	C10 H5 N O3	11.397		2000000	2000000	400000	10	100	125	0.9	0.2	0.2	-0.21	-2.26	-2.05	0.846916	0.368337	0.604371	7	1	0			No matches found	No matches found	No matches found	No matches found	ddMS2 for preferred ion	C10 H5 N O3_ppm:2.32_Ifit:64MatchedIso.:2	Fluoxastrobin_simScore:75.9		10266907_:Furo[3,4-f][1,3]benzodioxole-5-carbonitrile_ppm:0_mzLogicScore:NA; 9943942_:2-(2-Oxovinyl)-1H-isoindole-1,3(2H)-dione_ppm:0_mzLogicScore:NA; 60834522_:7-Hydroxy-2-oxo-2H-chromene-6-carbonitrile_ppm:0_mzLogicScore:NA; 44819446_:2-Isocyanato-4H-chromen-4-one_ppm:0_mzLogicScore:NA; 166934_:7H-Furo[2,3-b]pyrano[3,2-e]pyridin-7-one_ppm:0_mzLogicScore:NA; 10365988_:4-Hydroxy-2-oxo-2H-chromene…		down in E+
187.051	C7 H10 Cl N3 O	9.515		40000	200000	90000	125	10	22.2222	4	2	0.6	2.04	1.17	-0.86	0.336137	0.48529	0.914543	3	0	0			No matches found	No matches found	No matches found	No matches found	ddMS2 for preferred ion	C6 H10 N3 O2 P_ppm:0.77_Ifit:74MatchedIso.:2; C7 H10 Cl N3 O_ppm:-0.18_Ifit:76MatchedIso.:3			10607797_:Bis(1-cyanoethyl) phosphoramidoite_ppm:0_mzLogicScore:6; 10637877_:Bis(2-cyanoethyl) phosphoramidoite_ppm:0_mzLogicScore:6; 505773_:N-[2-(4-Chloro-1H-imidazol-5-yl)ethyl]acetamide_ppm:0_mzLogicScore:15		~same in all
187.12	C9 H17 N O3	4.857		400000	500000	1000000	25	0.8	100	1	3	2	0.23	1.4	1.16	0.963795	0.685472	0.818765	54	0	0			No matches found	No matches found	No matches found	No matches found	ddMS2 for preferred ion	C9 H17 N O3_ppm:-1.61_Ifit:88MatchedIso.:2			67033195_:4-Methyl-7-(methylamino)-7-oxoheptanoic acid_ppm:0_mzLogicScore:28; 67027415_:N-(4-Methylhexanoyl)glycine_ppm:0_mzLogicScore:33; 67034067_:5-Amino-2-isopropyl-4-oxohexanoic acid_ppm:0_mzLogicScore:28; 67152723_:2-Methyl-2-propanyl 5-amino-4-oxopentanoate_ppm:0_mzLogicScore:23; 67036084_:Methyl 2-methyl-3-{[2-(vinyloxy)ethyl]amino}propanoate_ppm:0_mzLogicScore:33; 67493465_:(9E)-9-(Hydro…		Maybe only in E+
188.045	C7 H4 N6 O	10.728		2000000	2000000	1000000	30	25	20	0.8	0.7	0.9	-0.4	-0.52	-0.13	0.592057	0.470959	0.962202	4	0	0			No matches found	No matches found	No matches found	No matches found	ddMS2 for preferred ion	C7 H4 N6 O_ppm:0.84_Ifit:36MatchedIso.:2			67037517_:Di-1,2,3-triazin-4-ylmethanone_ppm:0_mzLogicScore:13; 67494171_:2-Azidobenzoyl azide_ppm:0_mzLogicScore:13; 67492645_:(4-Oxo-3,4-dihydro-2-pteridinyl)cyanamide_ppm:0_mzLogicScore:18; 67493531_:4-Azidobenzoyl azide_ppm:0_mzLogicScore:13		~same in all; up in one C rep
188.079	C7 H12 N2 O4	9.507		600000	1000000	500000	50	50	20	2	0.8	0.4	0.97	-0.41	-1.38	0.327289	0.838639	0.195596	27	0	0			No matches found	No matches found	No matches found	No matches found	ddMS2 for preferred ion	C9 H17 P S_ppm:2.71_Ifit:39MatchedIso.:2; C7 H12 N2 O4_ppm:-1.81_Ifit:55MatchedIso.:4			67036907_:3-(2-Amino-3-hydroxy-5-methyl-2,3-dihydro-1,2-oxazol-4-yl)propanoic acid_ppm:0_mzLogicScore:54; 66423996_:4-(1H-Imidazol-2-yl)-1,1,1,4-butanetetrol_ppm:0_mzLogicScore:46; 66000943_:(2S)-2-(2-Amino-3-hydroxy-5-methyl-2,3-dihydro-1,2-oxazol-4-yl)propanoic acid_ppm:0_mzLogicScore:40; 67493027_:3-(2-Amino-3-hydroxy-5-methyl-2,3-dihydro-1,3-oxazol-4-yl)propanoic acid_ppm:0_mzLogicScore:41; 6…		~same in all Rxes
188.116	C8 H16 N2 O3	11.267		50000	100000	400000	20	40	17.5	3	8	3	1.64	3.02	1.39	0.0347105	0.00610036	0.0519186	46	5	0			No matches found	No matches found	No matches found	No matches found	ddMS2 for preferred ion	C8 H16 N2 O3_ppm:-2.77_Ifit:93MatchedIso.:2	Spectinomycin_simScore:63.6; 2-NP-AMOZ_simScore:66.1; Tilmicosin_simScore:68.3; Azithromycin impurity A_simScore:72.7; Diethyl iminodiacetate_score:90.8		67029030_:Ethyl [(3E)-3-(hydroxyimino)-2-methyl-2-butanyl]carbamate_ppm:0.001_mzLogicScore:18; 19960557_:N-Nitrosobutylcarboxypropylamine_ppm:0.001_mzLogicScore:27; 67025292_:4-[(4-Nitrosobutyl)amino]butanoic acid_ppm:0.001_mzLogicScore:22; 66737831_:(4S)-4,8-Diamino-3-oxooctanoic acid_ppm:0.001_mzLogicScore:29; 67497641_:4-Methyl-4-nitro-1-(vinyloxy)-3-pentanamine_ppm:0.001_mzLogicScore:23; 6715…		Present in E+, maybe present in C and E-
188.116	C8 H16 N2 O3	9.504		10000	40000	100000	100	75	50	4	10	3	2.02	3.65	1.63	0.296665	0.0862102	0.400816	46	13	0			No matches found	No matches found	No matches found	No matches found	ddMS2 for preferred ion	C8 H16 N2 O3_ppm:-2.73_Ifit:81MatchedIso.:2	3-{[1-(2-Carbamoylanilino)-1-oxopropan-2-yl]amino}-3-oxopropanoic acid_simScore:69.6; Υ-Glutamylcysteine_simScore:94; 4-Acetamido-5-[2-(4-hydroxyphenyl)ethylamino]-5-oxopentanoic acid_simScore:95.2; L-Glutathione oxidized_simScore:96.9; N-Phenylacetylglutamine_simScore:97.2; D-(+)-Pyroglutamic Acid_score:93; L-Pyroglutamic acid_score:93.5; D-(-)-Glutamine_score:98.6; DL-Glutamine_score:99.7		67029030_:Ethyl [(3E)-3-(hydroxyimino)-2-methyl-2-butanyl]carbamate_ppm:0.001_mzLogicScore:38; 19960557_:N-Nitrosobutylcarboxypropylamine_ppm:0.001_mzLogicScore:54; 67025292_:4-[(4-Nitrosobutyl)amino]butanoic acid_ppm:0.001_mzLogicScore:43; 66737831_:(4S)-4,8-Diamino-3-oxooctanoic acid_ppm:0.001_mzLogicScore:47; 67497641_:4-Methyl-4-nitro-1-(vinyloxy)-3-pentanamine_ppm:0.001_mzLogicScore:41; 6715…		Highest in E+, present in E- and one C
189.063	C7 H11 N O5	13.309		90000	50000	40000	66.6667	8	50	0.6	0.4	0.7	-0.82	-1.29	-0.47	0.742099	0.395547	0.752155	19	1	0			No matches found	No matches found	No matches found	No matches found	ddMS2 for preferred ion	C2 H8 N9 P_ppm:-4.44_Ifit:100MatchedIso.:1; C7 H11 N O5_ppm:-2.82_Ifit:86MatchedIso.:2	Diethyl iminodiacetate_score:90.8		11435345_:3,4,5-Trihydroxy-6-(hydroxymethyl)tetrahydro-2H-pyran-2-carbonitrile_ppm:0.001_mzLogicScore:23; 62887937_:Dimethyl 1,2-oxazolidine-3,3-dicarboxylate_ppm:0.001_mzLogicScore:28; 505958_:Dimethyl 2-[ethyl(oxido)imino]malonate_ppm:0.001_mzLogicScore:19; 7991228_:(1R,2S,3R)-2-[(S)-Amino(carboxy)methyl]-3-(hydroxymethyl)cyclopropanecarboxylic acid_ppm:0.001_mzLogicScore:33; 479120_:Dimethyl 1…		~same in all; one C rep up
189.1	C8 H15 N O4	6.708		200000	50000	300000	10	80	2.33333	0.2	1	6	-2.05	0.57	2.61	0.14097	0.809042	0.0864471	48	0	0			No matches found	No matches found	No matches found	No matches found	ddMS2 for preferred ion	C8 H15 N O4_ppm:-0.22_Ifit:89MatchedIso.:2			35014168_:8-Methyl-8-azabicyclo[3.2.1]octane-1,2,3,4-tetrol_ppm:0_mzLogicScore:26; 59664336_:N-[(2S)-2-Hydroxypropanoyl]valine_ppm:0_mzLogicScore:18; 67156745_:N-Isopropylidene-D-ribofuranosylamine_ppm:0_mzLogicScore:23; 29779844_:Ethyl N-acetyl-L-allothreoninate_ppm:0_mzLogicScore:23; 65328522_:3-Methyl-N-propylaspartic acid_ppm:0_mzLogicScore:19; 65328520_:N-Isopropyl-3-methylaspartic acid_ppm:…		Present in C and E+, messy peak
189.136	C9 H19 N O3	11.204		20000	90000	100000	5	33.3333	40	5	7	1	2.37	2.89	0.52	0.0185795	0.0105394	0.467802	9	3	0			No matches found	No matches found	No matches found	No matches found	ddMS2 for preferred ion	C9 H19 N O3_ppm:-2.89_Ifit:69MatchedIso.:2	Tilmicosin_simScore:68.3; Azithromycin impurity A_simScore:72.7; Diethyl iminodiacetate_score:90.8		67028116_:2,2-Diethyl-4,5-dihydroxypentanamide_ppm:0.001_mzLogicScore:15; 21375548_:5-Amino-3-hydroxy-7-methyloctanoic acid_ppm:0.001_mzLogicScore:19; 473533_:2-Nitro-4-nonanol_ppm:0.001_mzLogicScore:14; 500655_:2,4-Dihydroxy-N-isopropyl-3,3-dimethylbutanamide_ppm:0.001_mzLogicScore:20; 476774_:2-Methoxy-N-(2-methoxypropyl)-N-methylpropanamide_ppm:0.001_mzLogicScore:26; 79965_:Nonyl nitrate_ppm:0…		Only present in E+ and E-
189.946		21.81		7000000	7000000	5000000	10	5.71429	6	1	0.7	0.7	-0.01	-0.53	-0.52	0.994721	0.0304998	0.032163	1	0	0			No matches found	No matches found	No matches found	No matches found	ddMS2 for preferred ion				480226_:MFCD00795989_ppm:0.001_mzLogicScore:NA		~same in all Rxes
190.042	C6 H12 N2 O P2	10.729		700000	500000	500000	28.5714	20	1	0.8	0.7	1	-0.41	-0.45	-0.04	0.468417	0.444153	0.998034	4	0	0			No matches found	No matches found	No matches found	No matches found	ddMS2 for preferred ion	C6 H10 N2 O3 S_ppm:3.58_Ifit:43MatchedIso.:3; C6 H12 N2 O P2_ppm:-3.12_Ifit:88MatchedIso.:2			34559461_:(1s,2R,3R,4s,5S,6S)-2,3,4,5,6-Pentafluorocyclohexanol_ppm:0_mzLogicScore:30; 208226_:1,1,1,2,2-Pentafluoro-4-methyl-3-pentanone_ppm:0_mzLogicScore:28; 2016140_:3-(Trifluoromethyl)phenylboronic acid_ppm:-0.001_mzLogicScore:27; 2016141_:(4-Trifluoromethylphenyl)boronic acid_ppm:-0.001_mzLogicScore:27		~same in all; one C rep up
190.095	C7 H14 N2 O4	12.352		200000	1000000	6000000	45	4	33.3333	6	30	5	2.65	4.86	2.21	0.0226354	0.0042961	0.0424954	29	0	0			No matches found	No matches found	No matches found	No matches found	ddMS2 for preferred ion	C7 H14 N2 O4_ppm:-2.6_Ifit:65MatchedIso.:4			67034694_:O-[(E)-(1-Ethoxyethylidene)amino]-L-serine_ppm:0_mzLogicScore:22; 15295732_:N~2~-(Carboxymethyl)ornithine_ppm:0_mzLogicScore:31; 67156352_:Ethyl glycyl-L-serinate_ppm:0_mzLogicScore:22; 11344952_:3-(3-Aminopropyl)aspartic acid_ppm:0_mzLogicScore:39; 65328508_:N-(2-Aminoethyl)-3-methylaspartic acid_ppm:0_mzLogicScore:26; 62782116_:N~5~-(Carboxymethyl)-L-ornithine_ppm:0_mzLogicScore:31; 6…		Huge in E+, present in E-, maybe present in C (very weak peak)
191.066	C9 H6 N2 O2	10.932		600000	500000	300000	16.6667	40	23.3333	1	0.5	0.6	-0.07	-0.87	-0.8	0.971261	0.294537	0.362923	1	2	0	88		No matches found	No matches found	No matches found	No matches found	ddMS2 for preferred ion	C4 H9 N5 O4_ppm:5.04_Ifit:100MatchedIso.:1; C5 H5 N9_ppm:-1.96_Ifit:100MatchedIso.:1	Carbendazim_score:73.3; 2,6-Toluene diisocyanate_score:88		67031480_:1,5-Dinitro-1,3,5-triazepane_ppm:-0.001_mzLogicScore:NA		~same in all; mess
191.994	C4 H5 N2 O5 P	9.599		400000	600000	300000	20	16.6667	23.3333	1	0.7	0.6	0.33	-0.42	-0.75	0.538638	0.400574	0.143218	4	0	0			No matches found	No matches found	No matches found	No matches found	ddMS2 for preferred ion	C5 H9 N2 P S2_ppm:-1.77_Ifit:42MatchedIso.:2; C5 H N6 O P_ppm:-4.21_Ifit:62MatchedIso.:3; C4 H5 N2 O5 P_ppm:2.76_Ifit:80MatchedIso.:3			14672246_:2-(Cyanomethyl)benzenecarbodithioate_ppm:0.001_mzLogicScore:NA; 66737965_:Nickel(2+) diimidazol-1-ide_ppm:0_mzLogicScore:NA; 67026319_:2-Amino-3-pyridinyl perchlorate_ppm:0_mzLogicScore:NA; 370111_:[1,3]Thiazolo[2,3-b][1,3]benzothiazol-4-ium_ppm:-0.001_mzLogicScore:NA		~same in all Rxes
192.027	C6 H8 O7	9.507		1000000	1000000	200000	40	20	15	0.9	0.2	0.2	-0.15	-2.73	-2.58	0.910813	0.00707875	0.00818967	22	0	0			No matches found	No matches found	No matches found	No matches found	ddMS2 for preferred ion	C6 H8 O7_ppm:-0.57_Ifit:86MatchedIso.:3			67159005_:7,8-Dihydroxy-7,8-dimethyl-1,2,4,5-tetraoxaspiro[2.5]octan-6-one_ppm:0_mzLogicScore:36; 67157197_:(5S)-3,4-Dihydroxy-5-(1,1,2-trihydroxyethyl)-2(5H)-furanone_ppm:0_mzLogicScore:36; 4450365_:4-Deoxy-D-xylo-hexarate_ppm:0.001_mzLogicScore:36; 35015997_:L-erythro-Hexo-2,3-diulosonic acid_ppm:0_mzLogicScore:36; 58837655_:(3aS,6S,6aR)-3,3,3a,6-Tetrahydroxytetrahydrofuro[3,2-b]furan-2(3H)-one…		present in all samples, lowest (potentially) in E+
193.06	C6 H11 N O6	10.498		4000	7000	70000	22.5	71.4286	71.4286	2	20	10	0.94	4.22	3.28	0.73338	0.0533066	0.0911271	35	0	0			No matches found	No matches found	No matches found	No matches found	ddMS2 for preferred ion	C7 H7 N5 O2_ppm:-2.08_Ifit:74MatchedIso.:2; C6 H11 N O6_ppm:4.84_Ifit:56MatchedIso.:3			67031838_:(2Z,3Z)-N,N'-Dihydroxy-1,4-dihydropyrido[2,3-b]pyrazine-2,3-diimine_ppm:0_mzLogicScore:NA; 67139852_:(3E,4S,5R)-3-(Hydroxyimino)-2-(hydroxymethyl)tetrahydro-2H-pyran-2,4,5-triol (non-preferred name)_ppm:-0.001_mzLogicScore:NA; 67024301_:5-(Hydroxymethyl)-4-(1H-1,2,3-triazol-4-yl)-3(2H)-pyridazinone_ppm:0_mzLogicScore:NA; 67026643_:2-Amino-2-deoxy-D-taluronic acid_ppm:-0.001_mzLogicScore…		Only in E+, low abundance
193.095	C7 H15 N O5	12.488		90000	70000	70000	33.3333	28.5714	42.8571	0.8	0.8	1	-0.34	-0.39	-0.05	0.86699	0.782708	0.983556	18	0	0			No matches found	No matches found	No matches found	No matches found	ddMS2 for preferred ion	C7 H15 N O5_ppm:-2.71_Ifit:65MatchedIso.:2			67038970_:1,1-Diethoxy-3-nitro-2-propanol_ppm:0.001_mzLogicScore:NA; 67153784_:5-Methyl-3-nitro-1,2,3-hexanetriol_ppm:0.001_mzLogicScore:NA; 66424405_:(1S,2S,4S,5S)-5-Amino-1-(hydroxymethyl)-1,2,3,4-cyclohexanetetrol_ppm:0.001_mzLogicScore:NA; 18710349_:N-Methyl-D-glucopyranosylamine_ppm:0.001_mzLogicScore:NA; 61690470_:2-Amino-2-deoxy-6-O-methyl-D-glucopyranose_ppm:0.001_mzLogicScore:NA; 6642383…		~same in all
193.989	C5 H8 O4 P2	9.583		200000	200000	100000	15	15	10	1	0.7	0.5	0.34	-0.54	-0.88	0.411568	0.19504	0.063346	5	0	0			No matches found	No matches found	No matches found	No matches found	ddMS2 for preferred ion	C6 H2 N4 O2 S_ppm:-1.71_Ifit:61MatchedIso.:2; C5 H8 O4 P2_ppm:-1.38_Ifit:67MatchedIso.:2			58837604_:(1R,2R)-3,4-Dichloro-6-methyl-3,5-cyclohexadiene-1,2-diol_ppm:0.001_mzLogicScore:14; 58837606_:(1S,2S)-4,6-Dichloro-3-methyl-3,5-cyclohexadiene-1,2-diol_ppm:0.001_mzLogicScore:14; 58837609_:(1S,2R)-3,6-Dichloro-4-methyl-3,5-cyclohexadiene-1,2-diol_ppm:0.001_mzLogicScore:14; 7822171_:(1R,2R)-4,6-Dichloro-3-methyl-3,5-cyclohexadiene-1,2-diol_ppm:0.001_mzLogicScore:14; 470514_:1-(1,3,5-Tri…		~same in all Rxes
194.08	C8 H10 N4 O2	7.929		500000	1000000	400000	40	60	0.5	2	0.8	0.4	1.03	-0.3	-1.33	0.374426	0.913013	0.258248	39	0	0			No matches found	No matches found	No matches found	No matches found	No MS2	C8 H10 N4 O2_ppm:-1.23_Ifit:88MatchedIso.:2			67033840_:3,8,9-Trimethyl-3,9-dihydro-1H-purine-2,6-dione_ppm:0_mzLogicScore:NA; 67152791_:1-Methyl-N-nitroso-2-phenylhydrazinecarboxamide_ppm:0_mzLogicScore:NA; 67038338_:2-Ethoxy-7-methyl-1,7-dihydro-6H-purin-6-one_ppm:0_mzLogicScore:NA; 67174646_:1,1-Dimethyl-3-(5-nitroso-2-pyridinyl)urea_ppm:0_mzLogicScore:NA; 67169633_:2-(3-Acetyl-2-pyridinyl)hydrazinecarboxamide_ppm:0_mzLogicScore:NA; 67163…		~same in all Rxes - big mess
194.091	C7 H10 N6 O	8.964		20000	100000	600000	30	100	3.33333	6	30	5	2.48	4.72	2.24	0.133955	0.019351	0.0996003	6	0	0			No matches found	No matches found	No matches found	No matches found	ddMS2 for preferred ion	C6 H14 N2 O5_ppm:4.24_Ifit:58MatchedIso.:2; C7 H10 N6 O_ppm:-2.65_Ifit:68MatchedIso.:2			67028658_:2-(2,2-Dimethylhydrazino)-1,7-dihydro-6H-purin-6-one_ppm:0.001_mzLogicScore:11; 67028001_:(2R,3R,4R,5S,6E)-6-Hydrazono-1,2,3,4,5-hexanepentol (non-preferred name)_ppm:-0.001_mzLogicScore:14; 474368_:1,3,7-Trimethyl-1,2-dihydro-6H-[1,2,4]triazino[4,3-b][1,2,4,5]tetrazin-6-one_ppm:0.001_mzLogicScore:14; 517960_:2-(4,6-Diamino-1H-pyrazolo[3,4-d]pyrimidin-1-yl)ethanol_ppm:0.001_mzLogicScore…		Highest in E+, looks present in all 3
195.075	C7 H9 N5 O2	8.1		30000	30000	80000	10	13.3333	12.5	1	2	2	-0.04	1.28	1.31	0.969725	0.00968677	0.00886948	60	0	0			No matches found	No matches found	No matches found	No matches found	ddMS2 for preferred ion	C6 H13 N O6_ppm:4.82_Ifit:72MatchedIso.:2; C7 H9 N5 O2_ppm:-2.03_Ifit:81MatchedIso.:2			11590764_:4-O-Aminohexose_ppm:-0.001_mzLogicScore:12; 67028364_:2-C-Amino-D-gulose_ppm:-0.001_mzLogicScore:12; 65791638_:1-(Aminomethyl)-3-methyl-3,7-dihydro-1H-purine-2,6-dione_ppm:0_mzLogicScore:14; 65793895_:(2S,3R,4S,5S,6R)-2-Amino-6-(hydroxymethyl)tetrahydro-2H-pyran-2,3,4,5-tetrol (non-preferred name)_ppm:-0.001_mzLogicScore:14; 66738860_:(1R,2R,3R,4S,5S,6R)-1-Amino-1,2,3,4,5,6-cyclohexaneh…		Highest in E+ (still v. low abundance), but looks present in E- and C as well
197.08	C8 H11 N3 O3	9.495		200000	200000	200000	30	40	50	0.9	0.8	1	-0.17	-0.24	-0.07	0.943974	0.862449	0.97732	27	1	0			No matches found	No matches found	No matches found	No matches found	ddMS2 for preferred ion	C8 H11 N3 O3_ppm:-2.45_Ifit:72MatchedIso.:3	Amphomycin_simScore:66.5		67029878_:2-(Allyloxy)-4,6-dimethoxy-1,3,5-triazine_ppm:0_mzLogicScore:17; 20480990_:2-[(2-Amino-5-nitrophenyl)amino]ethanol_ppm:0_mzLogicScore:22; 67024599_:2-[1-(4-Nitrophenyl)hydrazino]ethanol_ppm:0_mzLogicScore:22; 66001048_:1-Acetyl-3-[(1E)-ethanehydrazonoyl]-4-hydroxy-1,5-dihydro-2H-pyrrol-2-one_ppm:0_mzLogicScore:34; 67161216_:4-(Methoxymethyl)-5-nitro-1,3-benzenediamine_ppm:0_mzLogicScore…		~same in all; reps don't agree well
197.081	C13 H11 N O	13.166		1000000	700000	700000	60	0.857143	71.4286	0.6	0.5	0.9	-0.77	-0.88	-0.11	0.714694	0.513359	0.914434	3	4	0	54.1		No matches found	No matches found	No matches found	No matches found	ddMS2 for preferred ion	C6 H16 N O4 P_ppm:-2.51_Ifit:89MatchedIso.:3	CUDA_simScore:81.6; 12-Aminododecanoic acid_simScore:81.8; Benzanilide_score:54.1; Laurolactam_score:92.5		67034309_:amino diisopropyl phosphate_ppm:0_mzLogicScore:8; 144616_:Methyl 2-(trimethylammonio)ethyl phosphate_ppm:0_mzLogicScore:10; 465140_:6-aminohexyl phosphate_ppm:0_mzLogicScore:24		~same in all; reps don't agree well
197.082	C7 H16 Cl N O3	11.391		100000	40000	30000	40	22.5	66.6667	0.3	0.2	0.7	-1.62	-2.07	-0.46	0.187301	0.0908692	0.66796	3	0	0			No matches found	No matches found	No matches found	No matches found	ddMS2 for preferred ion	C6 H16 N O4 P_ppm:-0.95_Ifit:85MatchedIso.:2; C7 H16 Cl N O3_ppm:-1.85_Ifit:88MatchedIso.:3			67034309_:amino diisopropyl phosphate_ppm:0_mzLogicScore:NA; 144616_:Methyl 2-(trimethylammonio)ethyl phosphate_ppm:0_mzLogicScore:NA; 465140_:6-aminohexyl phosphate_ppm:0_mzLogicScore:NA		up in C
197.089	C6 H12 O6	11.294		400000	1000000	2000000	50	10	50	3	6	2	1.49	2.59	1.1	0.197695	0.0670673	0.438192	4	1	0	57.4		No matches found	No matches found	No matches found	No matches found	ddMS2 for preferred ion	C6 H15 N O6_ppm:-2.5_Ifit:67MatchedIso.:3	D-(+)-Glucose_score:97.3		67153417_:(1xi)-1-C-Amino-D-galactitol_ppm:0_mzLogicScore:54; 67034448_:(1xi)-1-C-Amino-L-iditol_ppm:0_mzLogicScore:54; 65998326_:(1xi)-1-C-Amino-D-allitol_ppm:0_mzLogicScore:54; 67495934_:(1xi)-1-C-Amino-L-altritol_ppm:0_mzLogicScore:54		Highest in E+, present in E- and C as well
197.089	C6 H12 O6	12.438		6000000	4000000	3000000	5	12.5	16.6667	0.7	0.5	0.7	-0.51	-0.97	-0.46	0.139807	0.0276021	0.168331	4	7	0	60.1		No matches found	No matches found	No matches found	No matches found	ddMS2 for preferred ion	C6 H15 N O6_ppm:-2.36_Ifit:74MatchedIso.:3	CUDA_simScore:81.6; 12-Aminododecanoic acid_simScore:81.8; Laurolactam_score:92.5; D-(+)-Glucose_score:97.3		67153417_:(1xi)-1-C-Amino-D-galactitol_ppm:0_mzLogicScore:55; 67034448_:(1xi)-1-C-Amino-L-iditol_ppm:0_mzLogicScore:55; 65998326_:(1xi)-1-C-Amino-D-allitol_ppm:0_mzLogicScore:55; 67495934_:(1xi)-1-C-Amino-L-altritol_ppm:0_mzLogicScore:55		Highest in C; one non-integrated peak that's highest in E+
197.105	C10 H15 N O3	2.128		40000	10000	1000000	50	2	70	0.3	20	80	-1.73	4.59	6.32	0.244084	0.0242772	0.00988031	59	3	0			No matches found	No matches found	No matches found	No matches found	ddMS2 for preferred ion	C10 H15 N O3_ppm:-2.31_Ifit:78MatchedIso.:2	CUDA_simScore:81.6; 12-Aminododecanoic acid_simScore:81.8; Laurolactam_score:92.5		25991614_:Methyl (2S,5S,6R)-6-ethyl-7-oxo-1-azabicyclo[3.2.0]heptane-2-carboxylate_ppm:0_mzLogicScore:34; 66737813_:1,1'-(1-Oxido-3,4-dihydro-2H-pyrrole-2,2-diyl)di(1-propanone)_ppm:0_mzLogicScore:24; 26597665_:Methyl (2R)-8-methyl-3-oxo-8-azabicyclo[3.2.1]octane-2-carboxylate_ppm:0_mzLogicScore:33; 473979_:5-Hydroxy-1,2,2-trimethyl-4-propionyl-1,2-dihydro-3H-pyrrol-3-one_ppm:0_mzLogicScore:25; 1…		Highest in E+, but looks present in E- and C as well
197.116	C9 H15 N3 O2	4.318		20000	600000	3000000	15	50	30	20	100	5	4.6	6.83	2.22	0.00627837	0.00192437	0.0426029	15	1	0			No matches found	No matches found	No matches found	No matches found	ddMS2 for preferred ion	C9 H15 N3 O2_ppm:-2.58_Ifit:70MatchedIso.:2	Zolazepam_simScore:72.1		65792824_:4-[2-(1H-Pyrazol-3-yloxy)ethyl]morpholine_ppm:0.001_mzLogicScore:12; 67176832_:(2Z,4Z)-4-{(2E)-[(3Z)-3-(Hydroxyimino)-2-butanylidene]hydrazono}-2-penten-2-ol_ppm:0.001_mzLogicScore:12; 67495854_:7-Amino-1,3-diazaspiro[4.6]undecane-2,4-dione_ppm:0.001_mzLogicScore:33; 67498345_:3-Acetoxy-1,1-diallylguanidine_ppm:0.001_mzLogicScore:16; 67163484_:N-(2,2-Dimethoxyethyl)-N-methyl-2-pyrimidin…		only in E+ and E-, highest in E+
197.116	C9 H15 N3 O2	10.821		60000	5000000	40000000	83.3333	40	50	80	700	9	6.28	9.53	3.25	0.0153638	0.00477537	0.0935391	15	0	0			No matches found	No matches found	No matches found	No matches found	ddMS2 for preferred ion	C9 H15 N3 O2_ppm:-2.34_Ifit:31MatchedIso.:4			65792824_:4-[2-(1H-Pyrazol-3-yloxy)ethyl]morpholine_ppm:0_mzLogicScore:16; 67176832_:(2Z,4Z)-4-{(2E)-[(3Z)-3-(Hydroxyimino)-2-butanylidene]hydrazono}-2-penten-2-ol_ppm:0_mzLogicScore:11; 67495854_:7-Amino-1,3-diazaspiro[4.6]undecane-2,4-dione_ppm:0_mzLogicScore:23; 67498345_:3-Acetoxy-1,1-diallylguanidine_ppm:0_mzLogicScore:17; 67163484_:N-(2,2-Dimethoxyethyl)-N-methyl-2-pyrimidinamine_ppm:0_mzLo…		only in E+ and E-, highest in E+
197.116	C9 H15 N3 O2	9.522		10000	500000	3000000	50	100	10	40	200	5	5.32	7.57	2.25	0.0194028	0.00607151	0.113205	15	0	0			No matches found	No matches found	No matches found	No matches found	ddMS2 for preferred ion	C9 H15 N3 O2_ppm:-2.34_Ifit:72MatchedIso.:4			65792824_:4-[2-(1H-Pyrazol-3-yloxy)ethyl]morpholine_ppm:0_mzLogicScore:21; 67176832_:(2Z,4Z)-4-{(2E)-[(3Z)-3-(Hydroxyimino)-2-butanylidene]hydrazono}-2-penten-2-ol_ppm:0_mzLogicScore:15; 67495854_:7-Amino-1,3-diazaspiro[4.6]undecane-2,4-dione_ppm:0_mzLogicScore:31; 67498345_:3-Acetoxy-1,1-diallylguanidine_ppm:0_mzLogicScore:21; 67163484_:N-(2,2-Dimethoxyethyl)-N-methyl-2-pyrimidinamine_ppm:0_mzLo…		Only in E+, E-, very abundant
198.162	C12 H22 O2	2.2		500000	400000	400000	6	50	10	0.8	0.7	0.9	-0.29	-0.45	-0.16	0.714905	0.671074	0.996062	196	0	0			No matches found	No matches found	No matches found	No matches found	ddMS2 for preferred ion	C12 H22 O2_ppm:-0.93_Ifit:94MatchedIso.:2			4934161_:ethyl 3-decenoate_ppm:0_mzLogicScore:NA; 206233_:3-Ethyl-3-methyl-1,5-dioxaspiro[5.5]undecane_ppm:0_mzLogicScore:NA; 485234_:2,2-Dimethylpropyl cyclohexanecarboxylate_ppm:0_mzLogicScore:NA; 493007_:5-Heptyl-4-methyldihydro-2(3H)-furanone_ppm:0_mzLogicScore:NA; 21105882_:UNII:4DAS66OCPK_ppm:0_mzLogicScore:NA; 455778_:Methyl 1-butylcyclohexanecarboxylate_ppm:0_mzLogicScore:NA; 26676_:4,4,5…		~same in all; reps don't agree well
199.12	C10 H17 N O3	10.824		8000	10000	90000	2.5	20	44.4444	2	10	7	0.74	3.5	2.76	0.216399	0.00396826	0.00794144	68	0	0			No matches found	No matches found	No matches found	No matches found	No MS2	C10 H17 N O3_ppm:-4.17_Ifit:80MatchedIso.:2			18707253_:N-Methacryloyl-L-leucine_ppm:0.001_mzLogicScore:NA; 28542160_:4-Carboxylate-2,2,6,6-tetramethylpiperidine-N-oxyl_ppm:0.001_mzLogicScore:NA; 66424003_:5-[1-Hydroxy-2-(methylamino)ethyl]-1-methyl-2,4-cyclohexadiene-1,2-diol_ppm:0.001_mzLogicScore:NA; 67497930_:Ethyl 2-ethyl-3-methyl-2,3-dihydro-1H-pyrrole-2-carboxylate 1-oxide_ppm:0.001_mzLogicScore:NA; 67497940_:Ethyl 3-ethyl-2-methyl-2,…		only in E+
199.157	C11 H21 N O2	2.4		20000	100000	90000	40	100	100	5	4	0.7	2.32	1.82	-0.5	0.727765	0.781906	0.99394	23	0	0			No matches found	No matches found	No matches found	No matches found	No MS2	C11 H21 N O2_ppm:-2.84_Ifit:74MatchedIso.:2			10765124_:2-Isopropyl-5-methylcyclohexyl carbamate_ppm:0.001_mzLogicScore:NA; 67037317_:1-(1-Isopropoxyethyl)-2-azepanone_ppm:0.001_mzLogicScore:NA; 61052523_:4-(4,4,6-Trimethyl-5,6-dihydro-4H-1,3-oxazin-2-yl)-2-butanol_ppm:0.001_mzLogicScore:NA; 4516633_:6-Nitroundec-5-ene_ppm:0.001_mzLogicScore:NA; 524568_:Ethyl (2-tert-butyl-3-methyl-1-aziridinyl)acetate_ppm:0.001_mzLogicScore:NA; 492962_:1-[2…		Up in one E+, one E-, low in others, blank high
199.193	C12 H25 N O	2.249		20000	300000	20000	15	20	50	20	1	0.07	4.27	0.33	-3.94	0.0056876	0.858819	0.00678154	19	0	0			No matches found	No matches found	No matches found	No matches found	ddMS2 for preferred ion	C12 H25 N O_ppm:-3.33_Ifit:94MatchedIso.:2			67032380_:2,2-Diethyloctanamide_ppm:0.001_mzLogicScore:26; 67497072_:2,2,6,6-Tetramethyl-5-(methylamino)-3-heptanone_ppm:0.001_mzLogicScore:18; 57581669_:N-Hydroxy-1-dodecanimine_ppm:0.001_mzLogicScore:35; 4523498_:4-Dibutylaminobut-2-en-1-ol_ppm:0.001_mzLogicScore:12; 480061_:N-(3-Methyl-3-nonanyl)acetamide_ppm:0.001_mzLogicScore:23; 505122_:4-(5-Butyl-2-pyrrolidinyl)-1-butanol_ppm:0.001_mzLogic…		highest in E-, maybe in E+, C looks like noise. Very messy.
199.886		22.094		300000	300000	200000	33.3333	33.3333	5	1	0.7	0.7	-0.02	-0.44	-0.42	0.998367	0.653877	0.681884	0	0	0			No matches found	No matches found	No matches found	No matches found	ddMS2 for preferred ion						~same in all
200.014	C8 H8 O4 S	3.555		80000	70000	100000	50	100	200	0.8	2	2	-0.24	0.87	1.11	0.917607	0.996628	0.885687	11	0	0			No matches found	No matches found	No matches found	No matches found	ddMS2 for preferred ion	C10 H5 N2 O P_ppm:0.82_Ifit:90MatchedIso.:2; C8 H8 O4 S_ppm:-1.08_Ifit:97MatchedIso.:2			10607549_:Acetic phenyl anhydride_ppm:0_mzLogicScore:11; 9462098_:2,4-Dioxa-3-thiatetracyclo[5.2.1.1~5,8~.0~1,5~]undec-7-ene 3,3-dioxide_ppm:0_mzLogicScore:32; 4932200_:4-vinylphenol sulfate_ppm:0_mzLogicScore:4; 117595_:3-Hydroxy-4-methoxy-5-sulfanylbenzoic acid_ppm:0_mzLogicScore:11; 279829_:2-Oxo-2-phenylethanesulfonic acid_ppm:0_mzLogicScore:7; 680331_:Methyl 2,3-dihydrothieno[3,4-b][1,4]diox…		~same in all; up in one E+ rep
201.061	C4 H7 N7 O3	11.808		700000	600000	300000	10	11.6667	6.66667	0.8	0.5	0.6	-0.34	-1.09	-0.74	0.192181	0.0106487	0.0310107	18	21	0			No matches found	No matches found	No matches found	No matches found	ddMS2 for preferred ion	C12 H11 N S_ppm:-2.2_Ifit:63MatchedIso.:2; C4 H7 N7 O3_ppm:-1.29_Ifit:80MatchedIso.:2	(5ξ,6α,7α,9ξ,16ξ)-16-(β-D-Glucopyranosyloxy)-6,7,17-trihydroxykauran-19-oic acid_simScore:95.2; Agnuside_simScore:95.2; Scutellarioside II_simScore:95.2; (2E)-5-{(1R,4aS,5S,6R,8aS)-5-[(β-D-Glucopyranosyloxy)methyl]-6-hydroxy-5,8a-dimethyl-2-methylenedecahydro-1-naphthalenyl}-3-methyl-2-penten-1-yl β-D-glucopyranoside_simScore:95.2; 4-[(β-D-Glucopyranosyloxy)methyl]-6,7-dihydroxy-7-(hydroxymethyl)…		67159425_:8-[(1Z)-1-Propen-1-ylsulfanyl]quinoline_ppm:0_mzLogicScore:17; 14327898_:5,6-Dihydro-4H-benzo[6,7]cyclohepta[1,2-d][1,3]thiazole_ppm:0_mzLogicScore:20; 60816282_:4-[(E)-2-(2-Thienyl)vinyl]aniline_ppm:0_mzLogicScore:20; 67154774_:3-Vinyl-2-(vinylsulfanyl)-1H-indole_ppm:0_mzLogicScore:19; 500589_:9-Isothiocyanatotricyclo[6.2.1.0~2,7~]undeca-2,4,6-triene_ppm:0_mzLogicScore:21; 9042647_:5,1…		~same in all Rxes
201.111	C8 H15 N3 O3	9.982		70000	60000	200000	57.1429	50	5	0.9	4	4	-0.16	1.82	1.98	0.988891	0.145061	0.129432	9	0	0			No matches found	No matches found	No matches found	No matches found	ddMS2 for preferred ion	C8 H15 N3 O3_ppm:-2.26_Ifit:87MatchedIso.:2			67174949_:1-Oxa-4,7,10-triazacyclododecane-3,11-dione_ppm:0_mzLogicScore:27; 67163688_:3-Amino-4-(3-methyl-4-morpholinyl)-1,3-oxazolidin-2-one_ppm:0_mzLogicScore:46; 23254852_:3-(3-Amino-5-methyl-4-morpholinyl)-1,3-oxazolidin-2-one_ppm:0_mzLogicScore:25; 21187458_:N-Acetylalanyl-L-alaninamide_ppm:0_mzLogicScore:12; 471923_:N-Acetylglycyl-N-methylalaninamide_ppm:0_mzLogicScore:16; 493516_:N-[2-(4-…		Highest in E+, present in all 3
201.136	C10 H19 N O3	3.894		400000	200000	10000	22.5	100	10	0.5	0.03	0.05	-0.92	-5.21	-4.29	0.455922	0.0249854	0.0542967	41	0	0			No matches found	No matches found	No matches found	No matches found	ddMS2 for preferred ion	C10 H19 N O3_ppm:-0.79_Ifit:66MatchedIso.:2			67494765_:Methyl (9E)-9-(hydroxyimino)nonanoate_ppm:0_mzLogicScore:24; 67168032_:2-(1,3-Oxazolidin-3-yl)ethyl valerate_ppm:0_mzLogicScore:23; 29330306_:4-[(1E)-1-Buten-1-yl]-2,4,5-trideoxy-2-(methylamino)-L-xylonic acid_ppm:0_mzLogicScore:22; 9162496_:(2R,3S)-3-Amino-4-cyclohexyl-2-hydroxybutanoic acid_ppm:0_mzLogicScore:23; 61699572_:N-[(2R,3R,6S)-6-Ethoxy-2-methyltetrahydro-2H-pyran-3-yl]acetam…		Weakly present in C and E-; absent one E- and both E+
201.172	C11 H23 N O2	6.798		40000	200000	100000	7.5	50	40	4	4	0.8	2.13	1.87	-0.27	0.281394	0.259072	0.995292	17	0	0			No matches found	No matches found	No matches found	No matches found	ddMS2 for preferred ion	C11 H23 N O2_ppm:-2.62_Ifit:74MatchedIso.:2			67152756_:2-(2-Hydroxyethyl)nonanamide_ppm:0.001_mzLogicScore:NA; 67035788_:4-Ethyl-2,2,6,6-tetramethyl-4-piperidinol 1-oxide_ppm:0.001_mzLogicScore:NA; 67155329_:3-Hydroxy-8-methyldecanamide_ppm:0.001_mzLogicScore:NA; 67497581_:2-Hydroxy-N,N-dimethylnonanamide_ppm:0.001_mzLogicScore:NA; 480042_:3-Hydroxy-N,N-dimethylnonanamide_ppm:0.001_mzLogicScore:NA; 500091_:Isopropyl N-isopropylvalinate_ppm:…		up in E-, E+
202.045	C4 H6 N6 O4	11.331		500000	1000000	2000000	60	5	45	3	4	1	1.44	1.86	0.42	0.160616	0.102694	0.845365	3	7	0			No matches found	No matches found	No matches found	No matches found	ddMS2 for preferred ion	C6 H11 N4 P S_ppm:3.05_Ifit:42MatchedIso.:2; C4 H6 N6 O4_ppm:-1.15_Ifit:67MatchedIso.:3	(5ξ,6α,7α,9ξ,16ξ)-16-(β-D-Glucopyranosyloxy)-6,7,17-trihydroxykauran-19-oic acid_simScore:95.2; Agnuside_simScore:95.2; Scutellarioside II_simScore:95.2; (2E)-5-{(1R,4aS,5S,6R,8aS)-5-[(β-D-Glucopyranosyloxy)methyl]-6-hydroxy-5,8a-dimethyl-2-methylenedecahydro-1-naphthalenyl}-3-methyl-2-penten-1-yl β-D-glucopyranoside_simScore:95.2; 4-[(β-D-Glucopyranosyloxy)methyl]-6,7-dihydroxy-7-(hydroxymethyl)…		67026163_:2-(3,5-Dinitro-1H-1,2,4-triazol-1-yl)ethanamine_ppm:0_mzLogicScore:NA; 67491874_:1-(5-Nitro-2,4-dioxo-1-imidazolidinyl)guanidine_ppm:0_mzLogicScore:NA; 468176_:(2Z,4Z)-6-Amino-2,4-diimino-5-nitro-1,3(2H,4H)-pyrimidinediol_ppm:0_mzLogicScore:NA		Highest in E+; present in all
202.045	C4 H6 N6 O4	12.378		10000000	10000000	10000000	30	10	30	0.9	0.8	0.9	-0.09	-0.27	-0.18	0.975944	0.73161	0.838029	3	14	0			No matches found	No matches found	No matches found	No matches found	ddMS2 for preferred ion	C4 H6 N6 O4_ppm:-0.99_Ifit:44MatchedIso.:3	(5ξ,6α,7α,9ξ,16ξ)-16-(β-D-Glucopyranosyloxy)-6,7,17-trihydroxykauran-19-oic acid_simScore:95.2; Agnuside_simScore:95.2; Scutellarioside II_simScore:95.2; (2E)-5-{(1R,4aS,5S,6R,8aS)-5-[(β-D-Glucopyranosyloxy)methyl]-6-hydroxy-5,8a-dimethyl-2-methylenedecahydro-1-naphthalenyl}-3-methyl-2-penten-1-yl β-D-glucopyranoside_simScore:95.2; 4-[(β-D-Glucopyranosyloxy)methyl]-6,7-dihydroxy-7-(hydroxymethyl)…		67026163_:2-(3,5-Dinitro-1H-1,2,4-triazol-1-yl)ethanamine_ppm:0_mzLogicScore:NA; 67491874_:1-(5-Nitro-2,4-dioxo-1-imidazolidinyl)guanidine_ppm:0_mzLogicScore:NA; 468176_:(2Z,4Z)-6-Amino-2,4-diimino-5-nitro-1,3(2H,4H)-pyrimidinediol_ppm:0_mzLogicScore:NA		~same in all
202.095	C8 H14 N2 O4	8.6		50000	100000	40000	120	10	7.5	2	0.8	0.4	1.02	-0.39	-1.41	0.474581	0.946576	0.622343	29	10	0			No matches found	No matches found	No matches found	No matches found	ddMS2 for preferred ion	C10 H19 P S_ppm:1.7_Ifit:85MatchedIso.:2; C8 H14 N2 O4_ppm:-2.51_Ifit:68MatchedIso.:2	3-{[1-(2-Carbamoylanilino)-1-oxopropan-2-yl]amino}-3-oxopropanoic acid_simScore:69.6; N-Acetyl-1-aspartylglutamic acid_simScore:84.4; Υ-Glutamylcysteine_simScore:94; L-Glutathione oxidized_simScore:96.9; N-Phenylacetylglutamine_simScore:97.2; D-(+)-Pyroglutamic Acid_score:93; L-Pyroglutamic acid_score:93.5; D-(-)-Glutamine_score:98.6; DL-Glutamine_score:99.7		67038994_:1-(3-Amino-3-carboxypropyl)-2-azetidinecarboxylic acid_ppm:0.001_mzLogicScore:64; 67153620_:Methyl N-acetyl-L-alanylglycinate_ppm:0.001_mzLogicScore:50; 35032797_:4-Hydroxyprolylalanine_ppm:0.001_mzLogicScore:65; 66739037_:2,2'-[(E)-1,2-Diazenediyl]bis(2-methylpropanoic acid)_ppm:0.001_mzLogicScore:49; 66424643_:2,3-Diformyllysine_ppm:0.001_mzLogicScore:69; 10608448_:(NE)-N-(1-isopropyl…		~same in all
202.12	C10 H18 O4	4.828		200000	40000	200000	35	75	100	0.3	1	5	-1.89	0.52	2.41	0.234647	0.910702	0.164067	91	0	0			No matches found	No matches found	No matches found	No matches found	ddMS2 for preferred ion	C10 H18 O4_ppm:-0.81_Ifit:74MatchedIso.:2			67033643_:1,4-Hexanediyl diacetate_ppm:0_mzLogicScore:41; 67152693_:4a,8a-Dimethoxyoctahydro-1,4-benzodioxine_ppm:0_mzLogicScore:46; 67037358_:3,6-Dimethyloctanedioic acid_ppm:0_mzLogicScore:53; 65793269_:3-(2-Hydroxy-2-propanyl)-6-oxoheptanoic acid_ppm:0_mzLogicScore:58; 65998115_:10-Hydroxy-2-oxodecanoic acid_ppm:0_mzLogicScore:52; 59664335_:(2S,5S)-2-[(2R)-2-Butanyl]-5-hydroxy-4-oxohexanoic ac…		~same in all Rxes
202.131	C9 H18 N2 O3	10.937		300000	200000	500000	16.6667	1	4	0.8	2	2	-0.27	0.69	0.96	0.360605	0.0451945	0.0190623	27	23	0			No matches found	No matches found	No matches found	No matches found	ddMS2 for preferred ion	C9 H18 N2 O3_ppm:-2.75_Ifit:64MatchedIso.:3	4-{2-[(4-Chlorophenyl)sulfonyl]ethyl}morpholine_simScore:62.1; Halofuginone_simScore:62.2; N1-Acetylspermine_simScore:62.2; 1-(4-methylphenyl)-3-morpholinopropan-1-one_simScore:62.6; PDMP_simScore:62.6; Pramocaine_simScore:63.5; Furaltadone_simScore:65.9; 2-NP-AMOZ_simScore:66.1; Flupentixol_simScore:70.1; Zuclopenthixol_simScore:70.3		67036106_:1-Hydroxy-3-(hydroxyamino)-2,2,6,6-tetramethyl-4-piperidinone_ppm:0.001_mzLogicScore:31; 67027294_:Ethyl [(3E)-3-(hydroxyimino)-2-methyl-2-butanyl]methylcarbamate_ppm:0.001_mzLogicScore:25; 66738239_:(2S)-2,6-Diamino-7-oxononanoic acid_ppm:0.001_mzLogicScore:27; 67173698_:N,N~2~-Diethyl-L-glutamine_ppm:0.001_mzLogicScore:32; 67498460_:2-(2-Aminopropanoyl)norleucine_ppm:0.001_mzLogicScor…		Slightly elevated in E+, also present E-, C (low abundance)
203.081	C9 H9 N5 O	8.034		900000	900000	400000	55.5556	22.2222	50	1	0.5	0.5	0	-1.04	-1.04	0.985405	0.451686	0.389911	22	0	0			No matches found	No matches found	No matches found	No matches found	ddMS2 for preferred ion	C3 H10 N9 P_ppm:4.29_Ifit:100MatchedIso.:1; C9 H9 N5 O_ppm:-0.79_Ifit:99MatchedIso.:2			67174397_:N-Benzyl-N-nitroso-1H-1,2,4-triazol-1-amine_ppm:0_mzLogicScore:29; 67175139_:2-(5-Phenyl-5H-tetrazol-5-yl)acetamide_ppm:0_mzLogicScore:46; 67496652_:7-(1H-1,2,3-Triazol-1-yl)-1,5,6,7-tetrahydro-4H-indazol-4-one_ppm:0_mzLogicScore:44; 7876799_:(1E)-N'-(1H-Benzimidazol-2-yl)-N-oxoethanehydrazonamide_ppm:0_mzLogicScore:31; 8854994_:9-(2-Hydroxyethyl)-2-methyl-9H-purine-6-carbonitrile_ppm:0…		~same in all, messy
203.116	C9 H17 N O4	6.532		300000	300000	1000000	3.33333	26.6667	2	1	4	4	0	1.93	1.93	0.991588	0.0111818	0.0106525	36	0	0			No matches found	No matches found	No matches found	No matches found	ddMS2 for preferred ion	C9 H17 N O4_ppm:-0.56_Ifit:86MatchedIso.:2			67030207_:4-[(2-Carboxyethyl)(methyl)amino]-2-methylbutanoic acid_ppm:0_mzLogicScore:42; 67492553_:(3S)-3-Hydroxy-4-oxo-3-[(trimethylammonio)methyl]pentanoate_ppm:0_mzLogicScore:52; 67491884_:[(2-Methyl-2-propanyl)oxy]carbonyl 2-methylalaninate_ppm:0_mzLogicScore:35; 55869974_:N-(3-Methylbutanoyl)-L-homoserine_ppm:0_mzLogicScore:42; 65328523_:N-Butyl-3-methylaspartic acid_ppm:0_mzLogicScore:51; 6…		Highest in E+, present in C, maybe E- as well
204.061	C4 H8 N6 O4	11.706		1000000	800000	2000000	10	12.5	40	0.6	2	3	-0.64	0.71	1.35	0.29912	0.280919	0.0660457	1	1	0			No matches found	No matches found	No matches found	No matches found	ddMS2 for preferred ion	C6 H13 N4 P S_ppm:3.48_Ifit:40MatchedIso.:2; C4 H8 N6 O4_ppm:-0.68_Ifit:44MatchedIso.:3	N1-(4-Chlorophenyl)-2-{amino[5-(trifluoromethyl)-2-pyridyl]methylidene}hydrazine-1-carboxamide_simScore:94.5		106544_:1,1'-(1,2-Ethanediyl)bis(1-nitrosourea)_ppm:0_mzLogicScore:NA		~same in all Rxes
204.111	C8 H16 N2 O4	12.309		40000	70000	200000	25	11.4286	50	2	5	3	0.93	2.46	1.53	0.277426	0.0343837	0.122352	53	0	0			No matches found	No matches found	No matches found	No matches found	ddMS2 for preferred ion	C10 H21 P S_ppm:1.43_Ifit:77MatchedIso.:2; C8 H16 N2 O4_ppm:-2.73_Ifit:67MatchedIso.:3			11446478_:2,2-Diamino-4-[(2-methyl-2-propanyl)oxy]-4-oxobutanoic acid_ppm:0.001_mzLogicScore:22; 13442527_:2,6-Diaminooctanedioic acid_ppm:0.001_mzLogicScore:18; 18584342_:N~2~-(Methoxycarbonyl)-L-lysine_ppm:0.001_mzLogicScore:18; 35014900_:3-[3,4-Dihydroxy-2-(hydroxymethyl)-1-pyrrolidinyl]propanamide_ppm:0.001_mzLogicScore:17; 67174856_:N-(1,2,2-Trihydroxy-3-azepanyl)acetamide_ppm:0.001_mzLogicS…		Highest in E+, but in all three (maybe)
204.136	C8 H16 O2	4.859		10000000	4000000	3000000	10	50	66.6667	0.4	0.4	0.9	-1.39	-1.51	-0.12	0.183377	0.144809	0.956755	25	0	1		71.4	No matches found	Single match found	No matches found	No matches found	ddMS2 for preferred ion	C10 H20 O4_ppm:-0.62_Ifit:83MatchedIso.:2		2-Ethylhexanoic acid_score:71.4	35014730_:5-(1,2-Dihydroxy-2-propanyl)-2-methyl-1,3-cyclohexanediol_ppm:0_mzLogicScore:NA; 67170177_:3,9-Dihydroxydecanoic acid_ppm:0_mzLogicScore:NA; 67496330_:Ethyl (1-butoxyethoxy)acetate_ppm:0_mzLogicScore:NA; 67160372_:2,2-Dihydroxydecanoic acid_ppm:0_mzLogicScore:NA; 9427723_:1,4,7,10-Tetraoxacyclotetradecane_ppm:0_mzLogicScore:NA; 459297_:2-(2-Isobutoxyethoxy)ethyl acetate_ppm:0_mzLogicSco…		up in C
205.144		15.807		40000	70000	200000	0.25	14.2857	100	1	4	3	0.54	1.94	1.39	0.856085	0.381638	0.614102	0	0	0			No matches found	No matches found	No matches found	No matches found	ddMS2 for preferred ion						~same in all; up in one E+ rep
205.92	C3 H N2 O3 P3	22.024		500000	500000	400000	6	2	10	1	0.7	0.7	0.03	-0.56	-0.59	0.949309	0.020303	0.0175809	3	0	0			No matches found	No matches found	No matches found	No matches found	ddMS2 for preferred ion	C H2 O8 S2_ppm:4.55_Ifit:39MatchedIso.:3; C H4 O6 P2 S_ppm:-1.64_Ifit:39MatchedIso.:3; C3 H N2 O3 P3_ppm:0.21_Ifit:54MatchedIso.:3			67026733_:2,4,5-Trichloronicotinonitrile_ppm:0_mzLogicScore:NA; 67169384_:1,2-Digermaspiro[2.3]hexane_ppm:0.001_mzLogicScore:NA; 2016071_:5-Bromo-2-thienylboronic acid_ppm:0.001_mzLogicScore:NA		~same in all Rxes
207.056	C7 H13 N O4 S	8.58		200000	200000	50000	50	5	40	0.9	0.3	0.3	-0.19	-1.95	-1.76	0.990784	0.105791	0.116802	15	5	0			No matches found	No matches found	No matches found	No matches found	ddMS2 for preferred ion	C3 H11 N7 P2_ppm:4.04_Ifit:100MatchedIso.:1; C9 H10 N3 O P_ppm:-0.95_Ifit:92MatchedIso.:2; C7 H13 N O4 S_ppm:-2.78_Ifit:88MatchedIso.:4	CP-544439_simScore:71.3; N-Acetyl-D-galactosamine_simScore:72; 2-Aminoadipic acid_simScore:74.3; Muramic acid_simScore:74.8; Kanosamine_score:67.1		10608293_:3-Propyl-3-sulfanylaspartic acid_ppm:0.001_mzLogicScore:29; 56052199_:S-(2-Ethoxy-2-oxoethyl)-D-cysteine_ppm:0.001_mzLogicScore:18; 56635_:2-(Acryloylamino)-2-butanesulfonic acid_ppm:0.001_mzLogicScore:18; 18517356_:S-(2-CARBOXY-1-METHYLETHYL)-L-CYSTEINE_ppm:0.001_mzLogicScore:18; 67164237_:3-Amino-3-oxo-1-propen-2-yl 2-methyl-1-propanesulfonate_ppm:0.001_mzLogicScore:15; 64857048_:S-(2…		Messy, highest in C but in all 3
207.11	C8 H17 N O5	11.425		70000	80000	60000	14.2857	0.25	50	1	0.9	0.8	0.15	-0.12	-0.28	0.91443	0.894009	0.693232	10	5	0			No matches found	No matches found	No matches found	No matches found	ddMS2 for preferred ion	C8 H17 N O5_ppm:-1.93_Ifit:87MatchedIso.:2	Misoprostol acid_simScore:60.4; Irganox 330_simScore:61.8; 2,6-di-tert-Butylphenol_simScore:61.8; 2,4-di-tert-Butylphenol_simScore:61.8; Irganox 1010_simScore:61.8		11639725_:O-[2-(2-Methoxyethoxy)ethyl]serine_ppm:0_mzLogicScore:16; 388874_:N-Ethylglycocyamine_ppm:0_mzLogicScore:21; 391761_:2-Deoxy-2-(dimethylamino)-alpha-D-glucopyranose_ppm:0_mzLogicScore:22; 66000188_:3,5-Dihydroxy-2-(2-hydroxyethyl)-2-(hydroxymethyl)pentanimidic acid (non-preferred name)_ppm:0_mzLogicScore:28; 473982_:Methyl N-(2-hydroxyethoxy)-N-methoxy-2-methylalaninate_ppm:0_mzLogicSco…		~same in all
207.957		21.815		6000000	6000000	4000000	11.6667	5	7.5	1	0.7	0.7	0	-0.51	-0.51	0.999998	0.0589642	0.0590398	0	0	0			No matches found	No matches found	No matches found	No matches found	ddMS2 for preferred ion						~same in all Rxes
208.019	C4 H9 N4 O2 P S	3.722		100000	50000	100000	200	100	100	0.5	0.9	2	-1.12	-0.15	0.97	0.99719	0.988784	0.975099	5	0	0			No matches found	No matches found	No matches found	No matches found	No MS2	C2 H4 N6 O6_ppm:-0.48_Ifit:59MatchedIso.:2; C12 H5 N2 P_ppm:0.47_Ifit:67MatchedIso.:2; C10 H8 O3 S_ppm:-1.36_Ifit:73MatchedIso.:2; C4 H11 N4 P3_ppm:-2.51_Ifit:90MatchedIso.:2; C4 H9 N4 O2 P S_ppm:3.61_Ifit:90MatchedIso.:2			4524283_:(2E)-2-[Hydroxy(methoxy)methylene]-1-benzothiophen-3(2H)-one_ppm:0_mzLogicScore:NA; 8010014_:1-Azulenesulfonic acid_ppm:0_mzLogicScore:NA; 118275_:3-Methylene-2,3-dihydro-4H-thiochromen-4-one 1,1-dioxide_ppm:0_mzLogicScore:NA; 6553_:naphthalenesulfonic acid_ppm:0_mzLogicScore:NA; 8113_:2-Naphthalenesulfonic acid_ppm:0_mzLogicScore:NA		~same in all; reps don't agree well
208.058	C7 H12 O7	8.68		70000	100000	200000	42.8571	4	10	1	4	3	0.54	1.87	1.33	0.428301	0.0427946	0.113208	23	0	0			No matches found	No matches found	No matches found	No matches found	ddMS2 for preferred ion	C7 H12 O7_ppm:-0.95_Ifit:92MatchedIso.:2			18997210_:2,6-Anhydro-6-(hydroxymethyl)hexonic acid_ppm:0_mzLogicScore:NA; 66424513_:(4R,5R,6R)-4,5,6,7-Tetrahydroxy-2-oxoheptanoic acid_ppm:0_mzLogicScore:NA; 67159899_:4-O-Methyl-D-galacturonic acid_ppm:0_mzLogicScore:NA; 67169345_:1-C-Methyl-alpha-D-glucopyranuronic acid_ppm:0_mzLogicScore:NA; 18552895_:Methyl D-glucopyranosiduronic acid_ppm:0_mzLogicScore:NA; 9688773_:Methyl D-glucopyranurona…		Up in E+, weak but present in all 3
208.094	C8 H16 O6	7.21		80000	200000	300000	2.5	10	66.6667	2	4	2	1.28	1.98	0.7	0.176061	0.076001	0.578719	22	0	0			No matches found	No matches found	No matches found	No matches found	ddMS2 for preferred ion	C5 H8 N10_ppm:4.11_Ifit:67MatchedIso.:2; C8 H16 O6_ppm:-2.36_Ifit:90MatchedIso.:2			67032046_:3,4-Di-C-methyl-D-fructose_ppm:0_mzLogicScore:NA; 67494957_:(5S)-5-(2-Hydroxy-2-propanyl)-D-lyxopyranose_ppm:0_mzLogicScore:NA; 494007_:3,4,5-Trimethoxytetrahydro-2H-pyran-2,6-diol_ppm:0_mzLogicScore:NA; 4926742_:Methyl 2-O-methylhexopyranoside_ppm:0_mzLogicScore:NA; 4926961_:2,6-Di-O-methylhexopyranose_ppm:0_mzLogicScore:NA; 481910_:Methyl 3-O-methylhexopyranoside_ppm:0_mzLogicScore:NA…		~same in all; up in one E+ rep
208.094	C8 H16 O6	7.581		500000	100000	1000000	60	40	2	0.2	2	10	-2.35	1.11	3.46	0.0612521	0.243154	0.0194646	22	0	0			No matches found	No matches found	No matches found	No matches found	ddMS2 for other ion	C8 H16 O6_ppm:-1.26_Ifit:88MatchedIso.:2			67032046_:3,4-Di-C-methyl-D-fructose_ppm:0_mzLogicScore:32; 67494957_:(5S)-5-(2-Hydroxy-2-propanyl)-D-lyxopyranose_ppm:0_mzLogicScore:37; 494007_:3,4,5-Trimethoxytetrahydro-2H-pyran-2,6-diol_ppm:0_mzLogicScore:29; 4926742_:Methyl 2-O-methylhexopyranoside_ppm:0_mzLogicScore:33; 4926961_:2,6-Di-O-methylhexopyranose_ppm:0_mzLogicScore:33; 481910_:Methyl 3-O-methylhexopyranoside_ppm:0_mzLogicScore:33…		Very noisy, elevated in E+ compared to C, not in E-?
209.126	C8 H19 N O5	8.376		100000	200000	100000	6	35	40	1	0.9	0.7	0.34	-0.11	-0.44	0.878887	0.952253	0.731337	3	0	0			No matches found	No matches found	No matches found	No matches found	No MS2	C8 H19 N O5_ppm:-1.65_Ifit:64MatchedIso.:2			13337720_:2,2'-[(2-Hydroxyethyl)imino]di(1,3-propanediol)_ppm:0_mzLogicScore:NA; 9739078_:1-Deoxy-1-(dimethylamino)-D-glucitol_ppm:0_mzLogicScore:NA; 73505_:Bis-tris methane_ppm:0_mzLogicScore:NA		~same in all
209.127	C9 H15 N5 O	8.974		200000	700000	2000000	50	57.1429	10	5	10	3	2.25	3.59	1.34	0.119366	0.0358	0.304554	14	0	0			No matches found	No matches found	No matches found	No matches found	ddMS2 for preferred ion	C8 H19 N O5_ppm:3.79_Ifit:90MatchedIso.:2; C9 H15 N5 O_ppm:-2.6_Ifit:93MatchedIso.:2			8618489_:(6S)-2-Amino-6-propyl-5,6,7,8-tetrahydro-4(1H)-pteridinone_ppm:0.001_mzLogicScore:NA; 510855_:4-Methoxy-6-(1-pyrrolidinylmethyl)-1,3,5-triazin-2-amine_ppm:0.001_mzLogicScore:NA; 13337720_:2,2'-[(2-Hydroxyethyl)imino]di(1,3-propanediol)_ppm:-0.001_mzLogicScore:NA; 4524450_:2-(Diethylamino)-6,7-dihydroimidazo[1,2-a][1,3,5]triazin-4(1H)-one_ppm:0.001_mzLogicScore:NA; 7876265_:N'-(3-Methyl-1…		Highest in E+, then E-, then C
211.095	C9 H13 N3 O3	8.903		1000000	600000	600000	30	50	33.3333	0.5	0.6	1	-0.9	-0.8	0.11	0.312456	0.39718	0.962417	14	0	0			No matches found	No matches found	No matches found	No matches found	ddMS2 for preferred ion	C9 H13 N3 O3_ppm:-3.17_Ifit:67MatchedIso.:3			478178_:1,3-Dioxacyclohex-4-en-6-one, 4-azidomethyl-2-t-butyl-_ppm:0.001_mzLogicScore:NA; 20129840_:1-(2,5-Diamino-3-nitrophenyl)-1-propanol_ppm:0.001_mzLogicScore:NA; 65324029_:3-Amino-4-(2-cyano-1-pyrrolidinyl)-4-oxobutanoic acid_ppm:0.001_mzLogicScore:NA; 491169_:5-(2-Hydroxyethyl)-4,5,6,7-tetrahydro-3H-imidazo[4,5-c]pyridine-6-carboxylic acid_ppm:0.001_mzLogicScore:NA; 514622_:N-(2-Oxo-2,3-di…		~same in all; reps don't agree well
211.131	C10 H17 N3 O2	9.453		3000	70000	600000	33.3333	85.7143	83.3333	20	200	10	4.57	7.85	3.28	0.0887719	0.0192904	0.151206	22	0	0			No matches found	No matches found	No matches found	No matches found	ddMS2 for preferred ion	C10 H17 N3 O2_ppm:-2.74_Ifit:73MatchedIso.:3			67490440_:3-[(1E)-Ethanehydrazonoyl]-4-hydroxy-5-isobutyl-1,5-dihydro-2H-pyrrol-2-one_ppm:0.001_mzLogicScore:NA; 67493732_:Methyl N-[2-(5-methyl-1H-pyrazol-1-yl)ethyl]-beta-alaninate_ppm:0.001_mzLogicScore:NA; 25947102_:6-Azidohexyl methacrylate_ppm:0.001_mzLogicScore:NA; 515523_:(6Z)-5-Ethyl-6-imino-1-methyl-5-propyldihydro-2,4(1H,3H)-pyrimidinedione_ppm:0.001_mzLogicScore:NA; 10298935_:Ethyl 5-…		Only in E+, E-
212.115	C10 H16 N2 O3	9.844		90000	300000	300000	11.1111	33.3333	100	3	4	1	1.64	1.97	0.34	0.361474	0.337174	0.99675	18	2	0			No matches found	No matches found	No matches found	No matches found	ddMS2 for preferred ion	C10 H16 N2 O3_ppm:-3.35_Ifit:76MatchedIso.:2	4-(1-Methyl-4-nitro-1H-imidazol-5-yl)morpholine_simScore:75.6; Harmine_simScore:76.9		67037773_:1,3-Diacetyl-4-ethyl-5-methyl-2-imidazolidinone_ppm:0.001_mzLogicScore:NA; 65791808_:1-(2-Methyl-2-pentanyl)-2,4,6(1H,3H,5H)-pyrimidinetrione_ppm:0.001_mzLogicScore:NA; 67031988_:(2E,2'E)-N,N'-[Oxybis(methylene)]bis(2-butenamide)_ppm:0.001_mzLogicScore:NA; 13888887_:3-Ethyl-8-methyl-1-oxa-3,8-diazaspiro[4.5]decane-2,4-dione_ppm:0.001_mzLogicScore:NA; 531381_:5-Methoxycarbonyl-1,3-diazaa…		~same in all; one E+ rep up
212.115	C10 H16 N2 O3	10.093		100000	100000	400000	20	60	75	0.9	3	3	-0.09	1.67	1.76	0.968401	0.223015	0.181063	18	4	0			No matches found	No matches found	No matches found	No matches found	ddMS2 for preferred ion	C10 H16 N2 O3_ppm:-2.88_Ifit:64MatchedIso.:3	4-(1-Methyl-4-nitro-1H-imidazol-5-yl)morpholine_simScore:75.6; Harmine_simScore:76.9		67037773_:1,3-Diacetyl-4-ethyl-5-methyl-2-imidazolidinone_ppm:0.001_mzLogicScore:NA; 65791808_:1-(2-Methyl-2-pentanyl)-2,4,6(1H,3H,5H)-pyrimidinetrione_ppm:0.001_mzLogicScore:NA; 67031988_:(2E,2'E)-N,N'-[Oxybis(methylene)]bis(2-butenamide)_ppm:0.001_mzLogicScore:NA; 13888887_:3-Ethyl-8-methyl-1-oxa-3,8-diazaspiro[4.5]decane-2,4-dione_ppm:0.001_mzLogicScore:NA; 531381_:5-Methoxycarbonyl-1,3-diazaa…		really messy, up in one E+ sample, others look crapppy
212.141	C12 H20 O3	2.555		900000	10000	30000	44.4444	3	100	0.02	0.03	2	-6.1	-4.87	1.23	0.0138265	0.0215866	0.632587	91	0	0			No matches found	No matches found	No matches found	No matches found	ddMS2 for preferred ion	C12 H20 O3_ppm:-0.87_Ifit:94MatchedIso.:2			67032445_:3-(3-Octanyl)dihydro-2,5-furandione_ppm:0_mzLogicScore:27; 67031773_:(3E)-2-Oxo-3-decen-5-yl acetate_ppm:0_mzLogicScore:25; 67153785_:2-(Dimethoxymethyl)-1-(2-propyn-1-yl)cyclohexanol_ppm:0_mzLogicScore:25; 67035599_:7,7,8-Trimethyl-6-oxo-8-nonenoic acid_ppm:0_mzLogicScore:26; 67037800_:Ethyl 5-isopropyl-2,5-dimethyl-4,5-dihydro-3-furancarboxylate_ppm:0_mzLogicScore:26; 67036536_:Ethyl …		Only in C
213.245	C14 H31 N	9.853		2000000	2000000	1000000	10	45	40	1	0.7	0.6	0.09	-0.56	-0.64	0.998352	0.458434	0.436592	14	0	0			No matches found	No matches found	No matches found	No matches found	ddMS2 for preferred ion	C14 H31 N_ppm:-2.76_Ifit:75MatchedIso.:3			459377_:N-Butyl-N-pentyl-1-pentanamine_ppm:0.001_mzLogicScore:NA; 8528625_:12-Methyl-1-tridecanamine_ppm:0.001_mzLogicScore:NA; 520195_:N-Ethyl-4-propyl-4-nonanamine_ppm:0.001_mzLogicScore:NA; 516107_:N-Ethyl-5-propyl-5-nonanamine_ppm:0.001_mzLogicScore:NA; 493513_:N-Butyl-2-decanamine_ppm:0.001_mzLogicScore:NA; 505864_:N,4-Diethyl-4-decanamine_ppm:0.001_mzLogicScore:NA; 505839_:N-Ethyl-5-methyl-…		~same in all
214.131	C10 H18 N2 O3	9.478		7000	30000	300000	42.8571	66.6667	66.6667	4	40	10	1.96	5.44	3.48	0.313195	0.0232666	0.0648815	10	0	0			No matches found	No matches found	No matches found	No matches found	No MS2	C10 H18 N2 O3_ppm:-2.82_Ifit:74MatchedIso.:3			67176218_:6-Acetamido-N-acetylhexanamide_ppm:0.001_mzLogicScore:NA; 67493553_:1-(4,5-Dihydro-1H-pyrazol-1-yl)-3-[2-(vinyloxy)ethoxy]-2-propanol_ppm:0.001_mzLogicScore:NA; 492611_:2,3-Dimethyl-4-nitro-1-(1-pyrrolidinyl)-1-butanone_ppm:0.001_mzLogicScore:NA; 18618498_:N~2~-Methacryloyl-L-lysine_ppm:0.001_mzLogicScore:NA; 4183098_:Val-pro_ppm:0.001_mzLogicScore:NA; 126137_:Prolylvaline_ppm:0.001_mzL…		Only in E+ and one E-
214.157	C12 H22 O3	2.494		10000000	1000000	100000	60	5	40	0.09	0.009	0.1	-3.43	-6.79	-3.37	0.0105751	0.00140522	0.0101942	62	0	0			No matches found	No matches found	No matches found	No matches found	ddMS2 for preferred ion	C12 H22 O3_ppm:-0.5_Ifit:66MatchedIso.:3			13389784_:3-Dodecenoic acid, 6-hydroxy-_ppm:0_mzLogicScore:41; 67154046_:Methyl 6-(5-methyltetrahydro-2-furanyl)hexanoate_ppm:0_mzLogicScore:43; 67035666_:(2S,4R)-2-Ethoxy-1-methyl-4-(2-methyl-2-oxiranyl)cyclohexanol_ppm:0_mzLogicScore:40; 67034493_:1-[(4aS,8aR)-1-Hydroxydecahydro-1-naphthalenyl]-1,2-ethanediol_ppm:0_mzLogicScore:41; 67036370_:Butyl (2Z)-3-butoxy-2-butenoate_ppm:0_mzLogicScore:29…		Highest in C, lower in E-, lowest in E+ (gone)
215.115	C10 H17 N O4	6.615		1000000	300000	800000	30	33.3333	37.5	0.3	0.9	3	-1.68	-0.2	1.48	0.0793997	0.911203	0.107648	41	0	0			No matches found	No matches found	No matches found	No matches found	ddMS2 for preferred ion	C10 H17 N O4_ppm:-1.36_Ifit:75MatchedIso.:2			67037782_:3-Nitro-2-oxodecanal_ppm:0_mzLogicScore:27; 25991608_:(2S,6S)-6-[(1R)-1-Carboxypropyl]-2-piperidinecarboxylic acid_ppm:0_mzLogicScore:34; 25991609_:(2S,6S)-6-[(1S)-1-Carboxypropyl]-2-piperidinecarboxylic acid_ppm:0_mzLogicScore:34; 67025473_:Diisopropyl (2Z)-2-amino-2-butenedioate_ppm:0_mzLogicScore:20; 65328516_:N-Cyclopentyl-3-methylaspartic acid_ppm:0_mzLogicScore:20; 466805_:Dimethy…		Present in E+ and C, huge mess
215.163	C10 H21 N3 O2	12.508		400000	100000	100000	12.5	30	60	0.3	0.4	1	-1.62	-1.35	0.27	0.0563921	0.0819984	0.851251	4	0	0			No matches found	No matches found	No matches found	No matches found	ddMS2 for preferred ion	C10 H21 N3 O2_ppm:-2.78_Ifit:83MatchedIso.:2			67038152_:3-(Carbamoylamino)nonanamide_ppm:0.001_mzLogicScore:36; 14308462_:9-Carbamimidamidononanoic acid_ppm:0.001_mzLogicScore:36; 21378953_:(4,7-Dimethyl-1,4,7-triazonan-1-yl)acetic acid_ppm:0.001_mzLogicScore:35; 142138_:N,N-Diethyl-4-methyl-1-piperazinecarboxamide 4-oxide_ppm:0.001_mzLogicScore:34		~same in all; reps don't agree well
215.86		22.127		200000	200000	80000	5	4	8.75	0.9	0.5	0.5	-0.2	-1.15	-0.95	0.271948	0.00324323	0.00568047	2	0	0			No matches found	No matches found	No matches found	No matches found	ddMS2 for preferred ion				10686989_:Dibromo(dimethyl)silane_ppm:0.001_mzLogicScore:NA; 35808018_:(2,2-Dibromoethyl)silane_ppm:0.001_mzLogicScore:NA		~same in all Rxes
216.04	C6 H13 Cl O6	11.28		5000000	8000000	10000000	20	12.5	60	2	3	2	0.59	1.45	0.85	0.391849	0.0731026	0.246012	4	66	0			No matches found	No matches found	No matches found	No matches found	ddMS2 for preferred ion	C5 H13 O7 P_ppm:-0.55_Ifit:39MatchedIso.:2; C6 H13 Cl O6_ppm:-1.37_Ifit:52MatchedIso.:5	Asperulosidic acid_simScore:85.6; 2-(hydroxymethyl)-6-[(E)-4-(1,2,4-trihydroxy-2,6,6-trimethylcyclohexyl)but-3-en-2-yl]oxyoxane-3,4,5-triol_simScore:90.5; Lamiide_simScore:90.7; 2-[3,8-Dihydroxy-8-(hydroxymethyl)-3-methyl-2-oxodecahydro-5-azulenyl]-2-propanyl hexopyranoside_simScore:91.3; 3-Hydroxy-3,5,5-trimethyl-4-(3-oxo-1-buten-1-ylidene)cyclohexyl β-D-glucopyranoside_simScore:92.4; 1-O-(1,3,2…		30_:2,3,4-Trihydroxy-3-methylbutyl dihydrogen phosphate_ppm:0_mzLogicScore:42; 4450713_:1-HYDROXY-PENTANE-3,4-DIOL-5-PHOSPHATE_ppm:0_mzLogicScore:48; 61716018_:1-Deoxy-5-O-phosphono-D-ribitol_ppm:0_mzLogicScore:48; 391470_:2-C-methylerythritol 4-phosphate_ppm:0_mzLogicScore:42		Highest in E+, present in all 3
216.111	C9 H16 N2 O4	7.603		400000	200000	200000	25	50	20	0.5	0.6	1	-1.09	-0.72	0.37	0.30996	0.621958	0.733493	18	1	0			No matches found	No matches found	No matches found	No matches found	ddMS2 for preferred ion	C11 H21 P S_ppm:1.81_Ifit:79MatchedIso.:2; C9 H16 N2 O4_ppm:-2.12_Ifit:81MatchedIso.:2	N-Phenylacetylglutamine_simScore:97.2		65999381_:N~2~-Pyruvoyl-L-lysine_ppm:0_mzLogicScore:72; 66738584_:(4S)-4,6-Diamino-5,9-dioxononanoic acid_ppm:0_mzLogicScore:71; 67173123_:(4E)-5-Amino-4-[(4-hydroxy-2-oxobutyl)imino]pentanoic acid_ppm:0_mzLogicScore:69; 36562648_:4-[(N-Acetylglycyl)amino]-3-methylbutanoic acid_ppm:0_mzLogicScore:54; 17279441_:L-Prolyl-L-threonine_ppm:0_mzLogicScore:64; 474330_:Methyl 1-hydroxy-2,2,5,5-tetramethy…		~same in all; up in one C rep
216.112	C9 H16 N2 O4	7.684		200000	200000	100000	2.5	10	20	0.9	0.7	0.8	-0.19	-0.6	-0.41	0.422698	0.0417895	0.111019	18	0	0			No matches found	No matches found	No matches found	No matches found	ddMS2 for preferred ion	C9 H16 N2 O4_ppm:3.12_Ifit:81MatchedIso.:2			65999381_:N~2~-Pyruvoyl-L-lysine_ppm:-0.001_mzLogicScore:23; 66738584_:(4S)-4,6-Diamino-5,9-dioxononanoic acid_ppm:-0.001_mzLogicScore:18; 67173123_:(4E)-5-Amino-4-[(4-hydroxy-2-oxobutyl)imino]pentanoic acid_ppm:-0.001_mzLogicScore:16; 36562648_:4-[(N-Acetylglycyl)amino]-3-methylbutanoic acid_ppm:-0.001_mzLogicScore:16; 17279441_:L-Prolyl-L-threonine_ppm:-0.001_mzLogicScore:24; 474330_:Methyl 1-h…		Messy, weak peaks for all
216.136	C11 H20 O4	2.714		500000	40000	8000	40	50	25	0.09	0.02	0.2	-3.48	-5.93	-2.45	0.0144751	0.00315982	0.0390495	72	0	0			No matches found	No matches found	No matches found	No matches found	ddMS2 for preferred ion	C11 H20 O4_ppm:-0.37_Ifit:77MatchedIso.:2			67032005_:3,7-Dimethylnonanedioic acid_ppm:0_mzLogicScore:37; 67033636_:3,3,6-Trimethyloctanedioic acid_ppm:0_mzLogicScore:35; 67033664_:Methyl 3-[5-(3-hydroxypropyl)tetrahydro-2-furanyl]propanoate_ppm:0_mzLogicScore:42; 67037650_:5,5-Dimethylnonanedioic acid_ppm:0_mzLogicScore:37; 13704365_:1,1-Diethoxypropyl methacrylate_ppm:0_mzLogicScore:22; 67174159_:3-Hydroxy-2-oxobutyl heptanoate_ppm:0_mzL…		Highest in C, not in E- and E+?
216.154		2.25		50000	200000	50000	12	50	6	3	1	0.4	1.54	0.05	-1.49	0.478743	0.998197	0.503421	18	0	0			No matches found	No matches found	No matches found	No matches found	No MS2				67033641_:[2-(5,5-Dimethyl-1,3-dioxan-4-yl)ethyl](trimethyl)silane_ppm:0_mzLogicScore:NA; 67157941_:[(1E)-3,3-Diisobutoxy-1-propen-1-yl]silane_ppm:0_mzLogicScore:NA; 525421_:Triethylsilyl valerate_ppm:0_mzLogicScore:NA; 516634_:Butyl(dimethyl)(tetrahydro-2-furanylmethoxy)silane_ppm:0_mzLogicScore:NA; 516883_:1-Ethoxy-1-(pentyloxy)silolane_ppm:0_mzLogicScore:NA; 8902809_:4-{[Dimethyl(2-methyl-2-pr…		~same in all
216.172	C12 H24 O3	2.53		2000000	200000	200000	50	30	15	0.1	0.1	0.9	-3.1	-3.19	-0.09	0.0201343	0.0187824	0.987998	47	0	0			No matches found	No matches found	No matches found	No matches found	ddMS2 for preferred ion	C12 H24 O3_ppm:-1.48_Ifit:98MatchedIso.:2			13775586_:3-Hydroxy-2-methylundecanoic acid_ppm:0_mzLogicScore:40; 14380716_:3-(Nonyloxy)propanoic acid_ppm:0_mzLogicScore:38; 14380719_:4-(Octyloxy)butanoic acid_ppm:0_mzLogicScore:35; 62827221_:(2E)-4,6,6-Triethoxy-2-hexene_ppm:0_mzLogicScore:29; 35614159_:2-Butyl-3-hydroxyoctanoic acid_ppm:0_mzLogicScore:40; 469668_:Methyl 8-isopropoxyoctanoate_ppm:0_mzLogicScore:37; 8352272_:10-Hydroxydodecan…		up in C
217.131	C10 H19 N O4	6.9		300000	80000	100000	16.6667	37.5	6	0.3	0.4	1	-1.82	-1.31	0.51	0.0388258	0.0985242	0.435221	41	0	0			No matches found	No matches found	No matches found	No matches found	ddMS2 for preferred ion	C10 H19 N O4_ppm:-2.08_Ifit:98MatchedIso.:2			67027813_:N-(8-Hydroxyoctanoyl)glycine_ppm:0_mzLogicScore:34; 67029774_:N-(7-Hydroxyoctanoyl)glycine_ppm:0_mzLogicScore:34; 65998292_:(3S,4S)-4-Acetamido-3-hydroxy-6-methylheptanoic acid_ppm:0_mzLogicScore:33; 67491518_:1-Methyl 4-(2-methyl-2-propanyl) 2-methylaspartate_ppm:0_mzLogicScore:27; 18666049_:N-(Butoxycarbonyl)-L-valine_ppm:0_mzLogicScore:25; 65328524_:3-Methyl-N-pentylaspartic acid_ppm…		~same in all; maybe highest in C
218.055	C3 H7 Cl N10	11.688		100000	50000	100000	20	40	70	0.4	1	3	-1.49	0.05	1.54	0.169778	0.992376	0.187508	2	0	0			No matches found	No matches found	No matches found	No matches found	ddMS2 for preferred ion	C9 H17 P3_ppm:3.82_Ifit:74MatchedIso.:2; C8 H6 N6 O2_ppm:-0.37_Ifit:82MatchedIso.:2; C3 H7 Cl N10_ppm:3.56_Ifit:39MatchedIso.:3			43034517_:8-(1H-Pyrazol-4-yl)-3,9-dihydro-1H-purine-2,6-dione_ppm:0_mzLogicScore:24; 43034662_:8-(1H-Pyrazol-5-yl)-3,9-dihydro-1H-purine-2,6-dione_ppm:0_mzLogicScore:24		~same in all Rxes
219.012	C9 H7 N3 P2	7.619		20000	50000	60000	100	40	83.3333	3	3	1	1.39	1.53	0.13	0.476816	0.54892	0.985698	3	0	0			No matches found	No matches found	No matches found	No matches found	No MS2	C7 H10 N O3 P S_ppm:-0.28_Ifit:61MatchedIso.:2; C9 H7 N3 P2_ppm:1.46_Ifit:72MatchedIso.:2			66000785_:2,4,6,8,10,12,14,16-Heptadecaoctaynenitrile_ppm:-0.001_mzLogicScore:NA; 505861_:2-Acetoxy-5-(2-chloroethyl)-4-methylthiazol_ppm:0_mzLogicScore:NA; 111977_:4-amino-3-(5-chloro-2-thienyl)butyric acid_ppm:0_mzLogicScore:NA		Present in both E+, maybe in one E-, messy
219.075	C9 H17 N O S2	7.282		20000	30000	60000	45	30	33.3333	1	2	2	0.21	1.31	1.1	0.903396	0.157759	0.22871	20	0	0			No matches found	No matches found	No matches found	No matches found	No MS2	C3 H10 N9 O P_ppm:1.85_Ifit:100MatchedIso.:1; C9 H9 N5 O2_ppm:-2.86_Ifit:89MatchedIso.:2; C8 H13 N O6_ppm:3.25_Ifit:92MatchedIso.:2; C9 H17 N O S2_ppm:-0.72_Ifit:67MatchedIso.:3			67173127_:4-Phenyl-1,2,5-oxadiazole-3-carbohydrazonamide 2-oxide_ppm:0.001_mzLogicScore:NA; 67494733_:Methyl [2-(1H-tetrazol-5-yl)phenyl]carbamate_ppm:0.001_mzLogicScore:NA; 4515980_:(4E)-4-{[(5-Amino-1H-1,2,4-triazol-3-yl)amino]methylene}-3-hydroxy-2,5-cyclohexadien-1-one_ppm:0.001_mzLogicScore:NA; 4522562_:(4E)-2-Methoxy-4-[(1H-tetrazol-1-ylamino)methylene]-2,5-cyclohexadien-1-one_ppm:0.001_mzL…		Higher in E+, present in all 3
219.11	C9 H17 N O5	7.629		40000000	50000000	70000000	20	6	8.57143	1	2	1	0.16	0.67	0.5	0.618868	0.0581073	0.11924	15	1	0			No matches found	No matches found	No matches found	No matches found	ddMS2 for preferred ion	C9 H17 N O5_ppm:-2.06_Ifit:48MatchedIso.:4	trans-Zeatin_simScore:84.6		67496680_:N-Allyl-alpha-D-mannopyranosylamine_ppm:0_mzLogicScore:16; 62906914_:N-Allyl-beta-D-glucopyranosylamine_ppm:0_mzLogicScore:16; 7875826_:1-{5-[(E)-(Hydroxyimino)methyl]-2,2-dimethyl-1,3-dioxolan-4-yl}-2-methoxyethanol_ppm:0_mzLogicScore:12; 476790_:N-Hydroxy-2,3-O-isopropylidene-5-O-methylpentofuranosylamine_ppm:0_mzLogicScore:11; 511066_:Diethyl 3-(aminooxy)pentanedioate_ppm:0_mzLogicSc…		~same in all Rxes
219.158	C9 H21 N3 O3	9.66		4000	20000	200000	5	30	10	5	40	9	2.25	5.36	3.11	0.00693941	0.000563922	0.00254661	4	2	0			No matches found	No matches found	No matches found	No matches found	ddMS2 for preferred ion	C9 H21 N3 O3_ppm:-3.14_Ifit:78MatchedIso.:2	Ethyl 2-[(2-morpholinoanilino)carbothioyl]hydrazine-1-carboxylate_simScore:85.5		10801188_:1,3,5-TRIHYDROXYETHYLHEXAHYDROTRIAZINE_ppm:0.001_mzLogicScore:12; 4423293_:1,3,5-triamino-2,4,6-trimethoxycyclohexane_ppm:0.001_mzLogicScore:12; 19614_:2,2',2''-(1,3,5-Triazinane-2,4,6-triyl)triethanol_ppm:0.001_mzLogicScore:12; 94391_:Actane_ppm:0.001_mzLogicScore:15		potentially only in E+ and E- (weird C peak, but not aligned)
219.209		7.613		80000	30000	90000	37.5	133.333	111.111	0.4	1	3	-1.38	0.21	1.59	0.57339	0.967492	0.697375	0	1	0			No matches found	No matches found	No matches found	No matches found	ddMS2 for preferred ion		trans-Zeatin_simScore:84.6				~same in all
220.022	C7 H8 O8	6.796		300000	1000000	200000	16.6667	30	50	3	0.5	0.1	1.73	-1.01	-2.74	0.114801	0.263552	0.031839	2	0	0			No matches found	No matches found	No matches found	No matches found	ddMS2 for preferred ion	C2 H5 N8 O3 P_ppm:-2.47_Ifit:41MatchedIso.:2; C10 H9 N2 P S_ppm:-3.3_Ifit:38MatchedIso.:2; C11 H10 O P2_ppm:4.5_Ifit:66MatchedIso.:2; C7 H8 O8_ppm:-1.08_Ifit:74MatchedIso.:3			127_:2-Hydroxy-4-oxo-1,2,4-butanetricarboxylic acid_ppm:0_mzLogicScore:41; 200990_:1,1,3,3-Propanetetracarboxylic acid_ppm:0_mzLogicScore:31		Highest in E-
221.091	C14 H10 F N O2	8.161		2000000	400000	1000000	100	25	50	0.2	0.6	3	-2.26	-0.8	1.46	0.661306	0.999998	0.662392	57	1	0	94.9		No matches found	No matches found	No matches found	No matches found	ddMS2 for other ion	C3 H12 N9 O P_ppm:2.04_Ifit:32MatchedIso.:2; C8 H15 N O6_ppm:3.42_Ifit:42MatchedIso.:2; C9 H19 N O S2_ppm:-0.5_Ifit:39MatchedIso.:3; C9 H11 N5 O2_ppm:-2.63_Ifit:82MatchedIso.:3	2-Fluoro-6-(4-methoxyphenoxy)benzonitrile_score:94.9		67031206_:7-[(Allyloxy)methyl]-2-amino-1,7-dihydro-6H-purin-6-one_ppm:0.001_mzLogicScore:NA; 67028326_:2-{[(Allyloxy)methyl]amino}-1,7-dihydro-6H-purin-6-one_ppm:0.001_mzLogicScore:NA; 67035271_:3-Acetamido-3-deoxy-D-galactose_ppm:-0.001_mzLogicScore:NA; 67024352_:2-Amino-2-(9H-purin-9-yl)butanoic acid_ppm:0.001_mzLogicScore:NA; 66423826_:2-C-Acetamido-6-deoxy-D-altrose_ppm:-0.001_mzLogicScore:NA…		~same in all
221.894		22.117		400000	300000	200000	5	13.3333	0.5	0.9	0.5	0.6	-0.15	-1.01	-0.86	0.475853	0.0064691	0.0103659	0	0	0			No matches found	No matches found	No matches found	No matches found	ddMS2 for preferred ion						~same in all Rxes
223.051	C7 H13 N O5 S	7.456		2000000	1000000	200000	10	40	50	0.4	0.07	0.2	-1.37	-3.8	-2.43	0.261328	0.0245514	0.0802021	3	3	0			No matches found	No matches found	No matches found	No matches found	ddMS2 for preferred ion	C9 H10 N3 O2 P_ppm:-0.17_Ifit:42MatchedIso.:3; C7 H13 N O5 S_ppm:-1.87_Ifit:81MatchedIso.:4	7-(tert-Butyl)-2-(methylthio)pyrazolo[1,5-a][1,3,5]triazin-4-amine_simScore:68.1; Acamprosate_simScore:68.9; 2-Amino-6-methylmercaptopurine_simScore:69		65999127_:1-(4-Morpholinyl)-2-oxo-1-propanesulfonic acid_ppm:0_mzLogicScore:NA; 67026647_:[1-Amino-1-hydroxy-3-(methylsulfanyl)propyl]methylperoxyanhydride_ppm:0_mzLogicScore:NA; 134689_:S-(2-Carboxy-2-hydroxyethyl)-L-homocysteine_ppm:0_mzLogicScore:NA		Highest in C, lowest in E+
223.105	C8 H17 N O6	11.427		600000	800000	600000	8.33333	10	33.3333	1	0.9	0.8	0.26	-0.08	-0.35	0.661046	0.910465	0.464454	7	9	0			No matches found	No matches found	No matches found	No matches found	ddMS2 for preferred ion	C8 H17 N O6_ppm:-1.88_Ifit:77MatchedIso.:3	Prulaurasin_simScore:62.3; 3-Ethyl-4-hydroxy-4-methylpentyl 6-O-[(2S,3R,4R)-3,4-dihydroxy-4-(hydroxymethyl)tetrahydro-2-furanyl]-β-D-glucopyranoside_simScore:63.4; (1R,2R,3R,3aS,5aS,6R,7R,10R,10aR,10cR)-1,2,6,7-Tetrahydroxy-3,7,10a,10c-tetramethyl-4-oxo-2,3,3a,4,5a,6,6a,7,10,10a,10b,10c-dodecahydro-1H-phenanthro[10,1-bc]furan-10-yl β-D-glucopyranoside_simScore:65.8; Lamalbid_simScore:70; Trigoneo…		67157961_:6-Deoxy-6-[(2-hydroxyethyl)amino]-alpha-L-sorbofuranose_ppm:0_mzLogicScore:33; 8118243_:1-Acetamido-1-deoxy-D-glucitol_ppm:0_mzLogicScore:35; 9667090_:2-Aminoethyl alpha-D-mannopyranoside_ppm:0_mzLogicScore:44; 480025_:2,3,4,5,6-Pentahydroxy-N,N-dimethylhexanamide_ppm:0_mzLogicScore:36; 145374_:MFCD00133566_ppm:0_mzLogicScore:35; 144830_:N-Acetyl-D-glucosaminitol_ppm:0_mzLogicScore:35; …		~same in all; one E+ rep up
223.106	C9 H13 N5 O2	8.97		30000	60000	300000	23.3333	83.3333	0.233333	2	8	4	0.85	3.02	2.17	0.853879	0.0863419	0.130715	26	11	0			No matches found	No matches found	No matches found	No matches found	ddMS2 for preferred ion	C9 H21 N O S2_ppm:-1_Ifit:78MatchedIso.:2; C8 H17 N O6_ppm:2.9_Ifit:80MatchedIso.:2; C9 H13 N5 O2_ppm:-3.1_Ifit:77MatchedIso.:2	1,11,21-Trihydroxy-1,6,11,16,21,26-hexaazacyclohentriacontane-2,5,12,15,22,25-hexone_simScore:60.2; N-Imino(morpholino)methyl-N'-propylthiourea_simScore:60.5; 3-Morpholino-2,3-dihydro-1H-1λ6-benzo[b]thiophene-1,1-dione_simScore:67; Aminoethylethanolamine_simScore:67.2; Decanamide_simScore:67.4; N4-{2-Fluoro-3-[(morpholinocarbonyl)amino]phenyl}morpholine-4-carboxamide_simScore:67.5; 2-{[5-Hydroxy-…		16142380_:2-Amino-7-(2-ethoxyethyl)-1,7-dihydro-6H-purin-6-one_ppm:0.001_mzLogicScore:NA; 58837799_:(7S)-6-[(1R)-1-Hydroxyethyl]-2-imino-7-methyl-1,2,7,8-tetrahydro-4-pteridinol_ppm:0.001_mzLogicScore:NA; 13897312_:7-Amino-8-ethyl-1,3-dimethyl-3,7-dihydro-1H-purine-2,6-dione_ppm:0.001_mzLogicScore:NA; 13908832_:3-(Aminomethyl)phthalohydrazide_ppm:0.001_mzLogicScore:NA; 67025783_:1-(3-Aminopropyl)…		Only in E+, E-
224.118	C9 H21 O4 P	2.757		200000	10000	7000	50	10	28.5714	0.06	0.04	0.6	-4.06	-4.82	-0.76	0.00863422	0.00515891	0.390289	8	0	0			No matches found	No matches found	No matches found	No matches found	ddMS2 for preferred ion	C9 H21 O4 P_ppm:-0.46_Ifit:100MatchedIso.:1			515190_:Ethyl 1-methoxy-2-propanyl isopropylphosphonate_ppm:0_mzLogicScore:18; 511313_:Ethyl methyl 1,2,2-trimethylpropyl phosphate_ppm:0_mzLogicScore:18; 472424_:Ethyl 1-methoxy-2-propanyl propylphosphonate_ppm:0_mzLogicScore:18; 27865_:Diethyl pentyl phosphate_ppm:0_mzLogicScore:22; 73680_:Dibutyl methyl phosphate_ppm:0_mzLogicScore:20; 344861_:Diisopropyl (2-hydroxy-2-propanyl)phosphonate_ppm:…		Highest in C
224.127	C10 H16 N4 O2	9.175		200000	90000	100000	15	44.4444	2	0.4	0.7	2	-1.28	-0.56	0.72	0.0963163	0.480365	0.283607	20	0	0			No matches found	No matches found	No matches found	No matches found	ddMS2 for preferred ion	C9 H20 O6_ppm:3.45_Ifit:94MatchedIso.:2; C10 H16 N4 O2_ppm:-2.52_Ifit:46MatchedIso.:3			67027641_:(3S,4R,5S,6R)-2-Methyl-2,3,4,5,6,7-octanehexol_ppm:-0.001_mzLogicScore:20; 67029585_:(3S,4R,5R,6R)-2-Methyl-2,3,4,5,6,7-octanehexol_ppm:-0.001_mzLogicScore:20; 26001479_:[4-(2-Hydroxy-2-propanyl)-1H-1,2,3-triazol-1-yl](1-pyrrolidinyl)methanone_ppm:0.001_mzLogicScore:31; 13532058_:1-Butyl-1-(4-methyl-6-oxo-1,6-dihydro-2-pyrimidinyl)urea_ppm:0.001_mzLogicScore:30; 67172830_:2,4,6-Tri-O-me…		Highest in C
225.075	C9 H11 N3 O4	7.418		2000000	1000000	200000	25	30	30	0.6	0.1	0.2	-0.77	-3.13	-2.35	0.329387	0.0121303	0.026733	14	1	0			No matches found	No matches found	No matches found	No matches found	ddMS2 for preferred ion	C3 H12 N7 O3 P_ppm:3.4_Ifit:100MatchedIso.:1; C11 H16 N P S_ppm:2.59_Ifit:87MatchedIso.:2; C9 H11 N3 O4_ppm:-1.18_Ifit:93MatchedIso.:2	N-(1,1-Dioxotetrahydro-1H-1λ6-thiophen-3-yl)-2,1,3-benzoxadiazole-4-sulfonamide_simScore:69.1		14950797_:6-amino-2-(2-carboxyethyl)-5-methyl-pyrimidine-4-carboxylic acid_ppm:0_mzLogicScore:NA; 67497646_:4-Amino-1-[3-hydroxy-5-(hydroxymethyl)-2,3-dihydro-2-furanyl]-2(1H)-pyrimidinone_ppm:0_mzLogicScore:NA; 67161929_:N-(4-Amino-3-nitrophenyl)-L-alanine_ppm:0_mzLogicScore:NA; 67162810_:4-Amino-3-nitro-L-phenylalanine_ppm:0_mzLogicScore:NA; 7877207_:3-[(4-Nitro-phenyl)-hydrazono]-propane-1,2-d…		Highest in C, then E-, then E+
225.111	C10 H15 N3 O3	8.099		300000	90000	80000	30	22.2222	0.5	0.3	0.3	1	-1.6	-1.67	-0.07	0.0408845	0.0371503	0.985012	25	0	0			No matches found	No matches found	No matches found	No matches found	ddMS2 for preferred ion	C4 H16 N7 O2 P_ppm:2.2_Ifit:100MatchedIso.:1; C10 H15 N3 O3_ppm:-2.39_Ifit:80MatchedIso.:2			15369120_:1-[2-(3-Amino-2-hydroxypropoxy)phenyl]urea_ppm:0.001_mzLogicScore:17; 67171858_:(1Z,2Z)-2-(2-Acetyl-1-cyclohexen-1-yl)-N'-hydroxy-2-(hydroxyimino)ethanimidamide_ppm:0.001_mzLogicScore:20; 67498181_:2-[(4-Methoxy-6-methyl-2-pyrimidinyl)amino]ethyl acetate_ppm:0.001_mzLogicScore:18; 67163517_:4-[Methyl(nitro)amino]-4-(3-pyridinyl)-1-butanol_ppm:0.001_mzLogicScore:23; 65324901_:4-Amino-5-(…		up in C
226.131	C11 H18 N2 O3	9.612		1000000	1000000	700000	10	20	57.1429	0.7	0.5	0.6	-0.45	-1.09	-0.64	0.695381	0.208077	0.450414	18	33	0			No matches found	No matches found	No matches found	No matches found	ddMS2 for preferred ion	C5 H19 N6 O2 P_ppm:1.72_Ifit:34MatchedIso.:3; C11 H18 N2 O3_ppm:-2.84_Ifit:81MatchedIso.:4	(+/-)-threo-3,4-Dichloromethylphenidate_simScore:64.4; (+/-)-threo-Ethylnaphthidate_simScore:64.4; 3-[(3-Amino-1H-1,2,4-triazol-5-yl)amino]azepan-2-one_simScore:64.4; L-Lysine_simScore:64.7; L-Saccharopine_simScore:64.9; Acetyl norfentanyl_simScore:65.2; DL-Lysine_simScore:65.2; Norfentanyl_simScore:65.3; N6,N6,N6-Trimethyl-L-lysine_score:66.3; Pipecolic acid_score:79.5		65999641_:5-(5-Methylhexyl)-2,4,6(1H,3H,5H)-pyrimidinetrione_ppm:0.001_mzLogicScore:NA; 67162504_:4,4-Dimethyl-1-(2-methyl-2-propanyl)-2,5-dioxo-3-pyrrolidinecarboxamide_ppm:0.001_mzLogicScore:NA; 67162533_:2-(Dimethylamino)ethyl (2E)-4-carbamoyl-2-methyl-2,4-pentadienoate_ppm:0.001_mzLogicScore:NA; 465719_:N-Hydroxy-2,2-dimethyl-3-nitroso-1-oxaspiro[4.5]dec-3-en-4-amine_ppm:0.001_mzLogicScore:NA…		Highest in C
226.193	C14 H26 O2	2.138		3000000	3000000	2000000	33.3333	66.6667	5	1	0.8	0.7	0.13	-0.3	-0.44	0.992992	0.94453	0.90292	116	0	0			No matches found	No matches found	No matches found	No matches found	ddMS2 for preferred ion	C14 H26 O2_ppm:-0.59_Ifit:86MatchedIso.:2			19954256_:5,5,6-Trimethyl-3-undecyne-2,2-diol_ppm:0_mzLogicScore:38; 9271456_:7-Vinyldecyl acetate_ppm:0_mzLogicScore:38; 4509661_:(4Z)-4-Decen-1-yl butyrate_ppm:0_mzLogicScore:39; 4517118_:2-Octen-1-ol, 3,7-dimethyl-, isobutyrate, (Z)-_ppm:0_mzLogicScore:35; 4509712_:Z-4-dodecenyl acetate_ppm:0_mzLogicScore:41; 4509353_:Methyl (9E)-9-tridecenoate_ppm:0_mzLogicScore:44; 4445798_:(2E)-2,4-Dimethyl…		~same in all; reps don't agree well
227.079	C10 H13 N O5	7.278		100000	300000	70000	6	1.66667	57.1429	2	0.7	0.3	1.31	-0.57	-1.89	0.152442	0.450591	0.0558538	11	0	0			No matches found	No matches found	No matches found	No matches found	ddMS2 for preferred ion	C5 H10 N9 P_ppm:-3.88_Ifit:93MatchedIso.:2; C4 H14 N5 O4 P_ppm:2.01_Ifit:81MatchedIso.:2; C10 H13 N O5_ppm:-2.53_Ifit:67MatchedIso.:2			66000940_:Methyl (7S)-3a,7-dimethyl-4-oxo-3a,4,6,7-tetrahydro[1,2]oxazolo[3,2-c][1,4]oxazine-2-carboxylate_ppm:0.001_mzLogicScore:17; 67159704_:6-[(1S)-2-Amino-1-hydroxyethyl]-2,3-dihydroxyphenyl acetate_ppm:0.001_mzLogicScore:10; 67159909_:3,5-Dihydroxy-O-methyl-L-tyrosine_ppm:0.001_mzLogicScore:12; 166371_:4-Hydroxy-4-(4-hydroxyphenyl)threonine_ppm:0.001_mzLogicScore:14; 2338364_:1-(beta-D-Ribo…		~same in all Rxes
227.1	C7 H17 N O7	11.914		30000	50000	200000	10	20	10	1	6	4	0.55	2.52	1.97	0.212804	0.00383115	0.00764996	0	0	0			No matches found	No matches found	No matches found	No matches found	ddMS2 for preferred ion	C11 H19 N P2_ppm:2.96_Ifit:52MatchedIso.:2; C7 H17 N O7_ppm:-2.45_Ifit:69MatchedIso.:2					Highest in E+, but (probably) also present in C (E+ > C = E-)
227.188	C13 H25 N O2	2.278		400000	1000000	1000000	50	200	100	4	3	0.7	1.9	1.33	-0.57	0.8675	0.999697	0.856776	14	20	0			No matches found	No matches found	No matches found	No matches found	ddMS2 for preferred ion	C13 H25 N O2_ppm:-2.57_Ifit:92MatchedIso.:2	Milbemectin A4_simScore:61.6; Ergosterol peroxide_simScore:61.7; (1R,3R,4R,4aS)-4-Hydroxy-3,4a,8,8-tetramethyl-4-[2-(5-oxo-2,5-dihydro-3-furanyl)ethyl]decahydro-1-naphthalenyl acetate_simScore:62.3; 10-Nitrolinoleate_simScore:72.9; Ricinoleic acid methyl ester_simScore:73.8; (5ξ,9ξ,16ξ)-17-Hydroxykauran-19-oic acid_simScore:73.8; (3S)-3-Methyl-5-[(1S,8aR)-2,5,5,8a-tetramethyl-4-oxo-1,4,4a,5,6,7,8…		65999785_:3-Decyl-1,3-oxazolidin-2-one_ppm:0.001_mzLogicScore:23; 67493259_:1-(1-Hydroxy-2-piperidinyl)-1-octanone_ppm:0.001_mzLogicScore:27; 65324620_:1-Hydroxy-2,2,6-trimethyl-6-pentyl-4-piperidinone_ppm:0.001_mzLogicScore:26; 492047_:1-[6-(2-Hydroxypropyl)-1-methyl-1,2,3,6-tetrahydro-2-pyridinyl]-2-butanol_ppm:0.001_mzLogicScore:26; 4930624_:Ethyl 4-(2-ethyl-1-piperidinyl)butanoate_ppm:0.001_m…		Up in one E+, one E-, low in others, blank high
228.111	C10 H16 N2 O4	7.077		20000	40000	200000	30	50	40	2	8	5	0.61	2.93	2.32	0.61669	0.0290952	0.0523366	38	0	0			No matches found	No matches found	No matches found	No matches found	ddMS2 for preferred ion	C12 H21 P S_ppm:3.58_Ifit:85MatchedIso.:2; C10 H16 N2 O4_ppm:-0.14_Ifit:96MatchedIso.:2			67027879_:1-Acetyl-L-prolyl-L-alanine_ppm:0_mzLogicScore:28; 35032807_:4-Hydroxyprolylproline_ppm:0_mzLogicScore:31; 66000321_:(2S)-2,6-Diamino-7-oxo-7-(2-propyn-1-yloxy)heptanoic acid_ppm:0_mzLogicScore:37; 67162802_:6-(2,5-Dioxo-1-pyrrolidinyl)norleucine_ppm:0_mzLogicScore:33; 67168541_:1-(Dinitromethyl)bicyclo[3.3.1]nonane_ppm:0_mzLogicScore:35; 57568175_:N-Acetyl-L-alanyl-L-proline_ppm:0_mzLo…		Present in one E+ sample, weak in other; noise in C and E-
229.178	C11 H23 N3 O2	12.867		100000	30000	30000	10	13.3333	26.6667	0.2	0.2	1	-2.19	-2.23	-0.04	0.00746289	0.00686517	0.967973	2	1	0			No matches found	No matches found	No matches found	No matches found	ddMS2 for preferred ion	C11 H23 N3 O2_ppm:-2.7_Ifit:93MatchedIso.:2	L-Ergothioneine_score:88.5		25944163_:diacetylspermidine_ppm:0.001_mzLogicScore:33; 15579243_:10-Carbamimidamidodecanoic acid_ppm:0.001_mzLogicScore:30		up in C
229.938	C3 H4 O8 P2	21.809		3000000	2000000	2000000	6.66667	3.5	2.5	1	0.7	0.7	-0.06	-0.49	-0.42	0.719902	0.0157849	0.023095	2	0	0			No matches found	No matches found	No matches found	No matches found	ddMS2 for preferred ion	C3 H4 O8 P2_ppm:1.32_Ifit:72MatchedIso.:3			67160515_:2,3-Dihydroxy-3,3-bis[oxido(oxo)phosphoranyl]propanoic acid_ppm:0_mzLogicScore:NA; 67030701_:2,3-Bis{[oxido(oxo)phosphoranyl]oxy}propanoic acid_ppm:0_mzLogicScore:NA		Highest in C, E- ~= E+
229.979	C5 H11 Br O5	9.476		40000	10000	30000	100	100	66.6667	0.3	0.7	3	-1.94	-0.42	1.52	0.450387	0.983017	0.526102	1	0	0			No matches found	No matches found	No matches found	No matches found	No MS2	C2 H8 N4 O3 P2 S_ppm:-2.2_Ifit:100MatchedIso.:1; C4 H5 N6 P3_ppm:-0.54_Ifit:100MatchedIso.:1; C10 H2 N2 O3 S_ppm:0.51_Ifit:79MatchedIso.:2; C5 H11 Br O5_ppm:-1.12_Ifit:92MatchedIso.:2			66000803_:(Butylselanyl)(chloro)dimethylsilane_ppm:0.001_mzLogicScore:NA		~same in all
230.126	C10 H18 N2 O4	7.061		200000	100000	90000	15	30	22.2222	0.4	0.4	0.9	-1.16	-1.38	-0.22	0.0545848	0.0358048	0.777725	20	0	0			No matches found	No matches found	No matches found	No matches found	ddMS2 for preferred ion	C12 H23 P S_ppm:1.6_Ifit:80MatchedIso.:2; C10 H18 N2 O4_ppm:-2.09_Ifit:89MatchedIso.:2			67037888_:2-Amino-1,3-dioxa-2-azacyclotridecane-4,13-dione_ppm:0_mzLogicScore:54; 35032811_:4-Hydroxyprolylvaline_ppm:0_mzLogicScore:54; 67496384_:1-{2-Hydroxy-3-[2-(vinyloxy)ethoxy]propyl}-2-imidazolidinone_ppm:0_mzLogicScore:27; 57471724_:[(1-Hydroxy-2,2,5,5-tetramethyl-3-pyrrolidinyl)amino](oxo)acetic acid_ppm:0_mzLogicScore:45; 8418431_:Valyl-4-hydroxyproline_ppm:0_mzLogicScore:63; 7878611_:M…		~same in all
230.137	C14 H18 N2 O	11.557		300000	300000	300000	26.6667	66.6667	16.6667	0.7	1	1	-0.45	-0.02	0.43	0.673993	0.999896	0.681065	4	1	0	72.9		No matches found	No matches found	No matches found	No matches found	ddMS2 for preferred ion	C9 H18 N4 O3_ppm:-2.58_Ifit:96MatchedIso.:2	Propyphenazone_score:72.9		9399248_:(2E)-2-(Hydroxyimino)-N,N-bis[(2E)-2-(hydroxyimino)propyl]-1-propanamine_ppm:0.001_mzLogicScore:24; 493585_:2-Methyl-2-propanyl (2-{[(2Z)-2-amino-2-iminoethyl]amino}-2-oxoethyl)carbamate_ppm:0.001_mzLogicScore:24; 5385191_:Methyl N~2~-acetyl-N~5~-(diaminomethylene)-L-ornithinate_ppm:0.001_mzLogicScore:53; 68380_:Nitrilotripropionamide_ppm:0.001_mzLogicScore:24		~same in all
230.151	C12 H22 O4	4.135		3000000	500000	600000	66.6667	16	66.6667	0.2	0.2	1	-2.5	-2.35	0.15	0.0816621	0.0832026	0.999617	59	0	0			No matches found	No matches found	No matches found	No matches found	ddMS2 for preferred ion	C12 H22 O4_ppm:-1.33_Ifit:93MatchedIso.:2			67032763_:Bis(3-methylbutyl)peroxyanhydride_ppm:0_mzLogicScore:27; 67174526_:3-Hydroxy-2-oxobutyl octanoate_ppm:0_mzLogicScore:39; 21418733_:9-Ethyl-3-(hydroxymethyl)-1,7-dioxaspiro[5.5]undecan-4-ol_ppm:0_mzLogicScore:40; 4936240_:Dimethyl 2-(2-hexanyl)succinate_ppm:0_mzLogicScore:36; 9474157_:Methyl 9-acetoxynonanoate_ppm:0_mzLogicScore:40; 29786417_:2-(2-Acetoxyethyl)hexyl acetate_ppm:0_mzLogic…		Kind of up in C
232.055	C16 H8 O2	11.929		200000	200000	900000	15	30	5.55556	1	5	4	0.53	2.43	1.9	0.284205	0.00607482	0.0120426	24	1	0	51.6		No matches found	No matches found	No matches found	No matches found	ddMS2 for preferred ion	C7 H13 N4 O P S_ppm:2.27_Ifit:38MatchedIso.:2; C4 H12 N2 O9_ppm:4.38_Ifit:76MatchedIso.:3; C5 H8 N6 O5_ppm:-1.38_Ifit:92MatchedIso.:3	Aceanthrenequinone_score:51.6		13780318_:3-[(2-Phenylethyl)sulfanyl]-2H-pyran-2-one_ppm:0.001_mzLogicScore:NA; 67025770_:Phenoxy(phenyl)silanediol_ppm:0_mzLogicScore:NA; 67162873_:2-(3-Sulfanylpropyl)-1,4-naphthoquinone_ppm:0.001_mzLogicScore:NA; 31108833_:(2E)-3-(5-Ethyl-2-furyl)-1-(3-thienyl)-2-propen-1-one_ppm:0.001_mzLogicScore:NA; 15430737_:[4-(1-Hydroxyethyl)phenyl](2-thienyl)methanone_ppm:0.001_mzLogicScore:NA; 30776881…		Highest in E+, but in all samples
233.126	C10 H19 N O5	6.991		20000	100000	500000	50	30	18	4	20	5	2.1	4.53	2.43	0.0842516	0.0114828	0.0654548	17	0	0			No matches found	No matches found	No matches found	No matches found	ddMS2 for preferred ion	C5 H16 N9 P_ppm:-3.4_Ifit:63MatchedIso.:2; C10 H19 N O5_ppm:-2.09_Ifit:88MatchedIso.:2			67032373_:Methyl 3-methyl-3-(1,3,6,2-trioxazocan-2-yl)butanoate_ppm:0_mzLogicScore:NA; 67139947_:3-{[(2R)-2,4-Dihydroxy-3,3-dimethylbutanoyl]amino}-2-methylpropanoic acid_ppm:0_mzLogicScore:NA; 66424509_:4-Aminobutanoic (2R)-2,4-dihydroxy-3,3-dimethylbutanoic anhydride_ppm:0_mzLogicScore:NA; 67493945_:3-Hydroxy-3-methyl-4-nitrobutyl pivalate_ppm:0_mzLogicScore:NA; 13554581_:Bis(2-methyl-2-propany…		only in E+ and E-
234.084	C8 H14 N2 O6	10.728		200000	300000	200000	4.5	0.666667	30	1	1	0.7	0.54	0.1	-0.44	0.14455	0.910796	0.205045	9	0	0			No matches found	No matches found	No matches found	No matches found	ddMS2 for preferred ion	C3 H11 N10 O P_ppm:-4.63_Ifit:65MatchedIso.:2; C10 H21 P3_ppm:-5.13_Ifit:65MatchedIso.:2; C10 H19 O2 P S_ppm:0.31_Ifit:65MatchedIso.:2; C8 H14 N2 O6_ppm:-3.32_Ifit:73MatchedIso.:2			35032072_:beta-Aspartylthreonine_ppm:0.001_mzLogicScore:NA; 66738221_:(4R)-4-Amino-5-[(2-aminopropanoyl)peroxy]-5-oxopentanoic acid_ppm:0.001_mzLogicScore:NA; 4476496_:gamma-Glutamylserine_ppm:0.001_mzLogicScore:NA; 14986881_:asp-thr_ppm:0.001_mzLogicScore:NA; 2529564_:thr-asp_ppm:0.001_mzLogicScore:NA; 10701742_:3,4-Diamino-3-(carboxymethyl)hexanedioic acid_ppm:0.001_mzLogicScore:NA; 2848904_:Se…		~same in all Rxes
234.147	C11 H22 O5	2.708		800000	50000	7000	50	6	28.5714	0.07	0.01	0.1	-3.85	-6.67	-2.82	0.0135384	0.00263726	0.0286774	6	0	0			No matches found	No matches found	No matches found	No matches found	No MS2	C6 H19 N8 P_ppm:-2.46_Ifit:64MatchedIso.:2; C12 H26 S2_ppm:-4.87_Ifit:88MatchedIso.:2; C11 H22 O5_ppm:-1.16_Ifit:91MatchedIso.:2			67037252_:2,2-Bis(butylsulfanyl)butane_ppm:0.001_mzLogicScore:NA; 9174124_:3-Hydroxy-2,2-bis(hydroxymethyl)propyl hexanoate_ppm:0_mzLogicScore:NA; 4929881_:1,2-Bis(ethylthio)octane_ppm:0.001_mzLogicScore:NA; 472175_:3-O-Acetyl-2,4-dideoxy-1-O-(methoxymethyl)-2,4-dimethylpentitol_ppm:0_mzLogicScore:NA; 16495602_:1,1-Dodecanedithiol_ppm:0.001_mzLogicScore:NA; 74608_:Hexyl disulfide_ppm:0.001_mzLogi…		High in C, present in E-, absent in E+(?)
235.07	C8 H13 N O7	8.66		7000	3000	60000	14.2857	1.66667	50	0.4	8	20	-1.37	2.91	4.28	0.12021	0.01812	0.00593638	26	0	0			No matches found	No matches found	No matches found	No matches found	No MS2	C3 H10 N9 O2 P_ppm:1.75_Ifit:100MatchedIso.:1; C9 H17 N O2 S2_ppm:-0.65_Ifit:85MatchedIso.:2; C9 H9 N5 O3_ppm:-2.64_Ifit:85MatchedIso.:2; C8 H13 N O7_ppm:3.05_Ifit:89MatchedIso.:2			67031368_:N-Acetyl-N-(6-oxo-6,7-dihydro-1H-purin-2-yl)acetamide_ppm:0.001_mzLogicScore:NA; 65998442_:(2E)-2-[(4-Nitrophenyl)hydrazono]-4-imidazolidinone_ppm:0.001_mzLogicScore:NA; 24605009_:2-[2-(2-Aminoethoxy)-2-oxoethyl]-2-hydroxysuccinic acid_ppm:-0.001_mzLogicScore:NA; 67024476_:(5R)-5-Amino-2-(1,2-dihydroxyethyl)-2-hydroxy-1,3-dioxocane-4,8-dione_ppm:-0.001_mzLogicScore:NA; 66738963_:(2E)-2-…		highest in E+, possibly present in other two (E+> C =~ E-)
235.141	C10 H21 N O5	10.327		1000000	800000	500000	0.6	25	20	0.7	0.4	0.6	-0.51	-1.34	-0.83	0.353261	0.0487729	0.15935	1	0	0			No matches found	No matches found	No matches found	No matches found	ddMS2 for preferred ion	C10 H21 N O5_ppm:-2.71_Ifit:85MatchedIso.:3			67175967_:1-Ethoxy-N-[ethoxy(methylsilyl)methyl]-N-methyl-1-(methylsilyl)methanamine_ppm:0.001_mzLogicScore:NA		Highest in C, lowest in E+
235.153	C9 H21 N3 O4	9.663		8000	60000	300000	100	13.3333	6.66667	7	40	5	2.76	5.15	2.39	0.0797815	0.0178249	0.14861	2	5	0			No matches found	No matches found	No matches found	No matches found	ddMS2 for preferred ion	C11 H26 N P S_ppm:0.6_Ifit:92MatchedIso.:2; C9 H21 N3 O4_ppm:-3.01_Ifit:85MatchedIso.:2	Carbetamide_simScore:96.3; Bicine_simScore:96.8; 5-Aminovaleric acid_score:96.9; Betaine_score:98.8; Valine_score:99.1		475549_:N-Isopropyl-P,P-bis(2-methyl-2-propanyl)phosphinothioic amide_ppm:0_mzLogicScore:15; 503153_:N,P-Di-tert-butyl-P-isopropylphosphinothioic amide_ppm:0_mzLogicScore:15		Present in E+, maybe present in E- and C, but ambiguous
239.09	C4 H14 N7 O3 P	7.494		500000	300000	40000	18	10	50	0.6	0.09	0.2	-0.74	-3.44	-2.7	0.379284	0.00959408	0.0184695	12	0	0			No matches found	No matches found	No matches found	No matches found	ddMS2 for preferred ion	C4 H14 N7 O3 P_ppm:3.84_Ifit:100MatchedIso.:1			65999903_:1-(2-{[Chloro(vinyl)silyl]methyl}phenyl)-N,N-dimethylmethanamine_ppm:-0.001_mzLogicScore:31; 7875786_:N'-[(E)-(5-Nitro-2-furyl)methylene]pentanehydrazide_ppm:0_mzLogicScore:23; 530976_:N-sec-Butyl-2,6-dinitroaniline_ppm:0_mzLogicScore:30; 499373_:4-Amino-1-[4,5-dihydroxy-3-(hydroxymethyl)-2-cyclopenten-1-yl]-2(1H)-pyrimidinone_ppm:0_mzLogicScore:25; 65791274_:4-Amino-1-(2-deoxy-2-methyl…		~same in all Rxes
239.101	C9 H13 N5 O3	8.975		100000	300000	800000	60	66.6667	25	3	7	2	1.72	2.89	1.17	0.223854	0.060425	0.333926	30	5	0			No matches found	No matches found	No matches found	No matches found	ddMS2 for preferred ion	C9 H21 N O2 S2_ppm:-0.62_Ifit:42MatchedIso.:2; C8 H17 N O7_ppm:3.01_Ifit:87MatchedIso.:2; C9 H13 N5 O3_ppm:-2.58_Ifit:95MatchedIso.:2	D-Alanine methyl ester_score:60.4; DL-3-Aminoisobutyric acid_score:88; L(+)-2-Aminobutyric acid_score:95.9; N,N-Dimethylglycine_score:97; Υ-Aminobutyric acid (GABA)_score:99.8		67037369_:(1xi)-1-C-Acetamido-L-iditol_ppm:-0.001_mzLogicScore:26; 67171904_:N'~2~,N'~6~-Dimethyl-2,6-pyridinedicarbohydrazide 1-oxide_ppm:0.001_mzLogicScore:17; 65792031_:2-[(4,4-Dihydroxybutyl)amino]-1,7-dihydro-6H-purin-6-one_ppm:0.001_mzLogicScore:26; 161_:1-(2-Amino-4-oxo-3,4,4a,5,6,7,8,8a-octahydro-6-pteridinyl)-1,2-propanedione_ppm:0.001_mzLogicScore:34; 58837697_:2-Hydroxy-1-[(6R)-4-hydro…		Slightly up in E+. Present in all
240.147	C17 H20 O	9.63		10000000	6000000	10000000	20	33.3333	4	0.6	1	2	-0.72	0.09	0.81	0.169336	0.948318	0.131276	22	4	0	99.5		No matches found	No matches found	No matches found	No matches found	ddMS2 for preferred ion	C6 H21 N6 O2 P_ppm:1.28_Ifit:33MatchedIso.:2; C12 H20 N2 O3_ppm:-3.02_Ifit:89MatchedIso.:3	Pirbuterol_score:88.2; 2-(Cyclohexylmethylidene)-1,2,3,4-tetrahydronaphthalen-1-one_score:99.5		66424401_:6-sec-Butyl-1,5-dihydroxy-3-isobutyl-2(1H)-pyrazinone_ppm:0.001_mzLogicScore:NA; 26050927_:N-Boc-(+)-norloline_ppm:0.001_mzLogicScore:NA; 389764_:(1S)-6-Acetamidooctahydro-1-indolizinyl acetate_ppm:0.001_mzLogicScore:NA; 21377396_:prolyl-4-piperidinylacetic acid_ppm:0.001_mzLogicScore:NA; 65325823_:N-{2-[2-(2-Methoxyethoxy)ethoxy]ethyl}-4-pyridinamine_ppm:0.001_mzLogicScore:NA; 4380428_…		~same in all Rxes (looks like Hades' hair in Hercules)
240.172	C14 H24 O3	2.427		200000	20000	20000	50	10	30	0.09	0.1	1	-3.42	-3.05	0.37	0.0143909	0.0196885	0.780517	23	0	0			No matches found	No matches found	No matches found	No matches found	ddMS2 for preferred ion	C14 H24 O3_ppm:-0.64_Ifit:66MatchedIso.:2			67175962_:(6Z)-3,7-Dimethyl-10-oxo-6-decen-1-yl acetate_ppm:0_mzLogicScore:15; 67177399_:(2E,4E)-3-Hydroxy-2,4-tetradecadienoic acid_ppm:0_mzLogicScore:15; 67031783_:(3E,10E)-1-Hydroxy-3,10-dodecadien-1-yl acetate_ppm:0_mzLogicScore:15; 4934544_:(E)-5-Hydroxy-2-isopropenyl-5-methyl-hex-3-enyl isobutyrate_ppm:0_mzLogicScore:18; 4934536_:4-Hydroxy-2-isopropenyl-5-methylhex-5-enyl isobutyrate_ppm:0_…		up in C
241.276	C16 H35 N	9.857		100000	200000	100000	20	20	3	1	1	0.7	0.42	-0.04	-0.47	0.427797	0.993821	0.388793	10	0	0			No matches found	No matches found	No matches found	No matches found	No MS2	C16 H35 N_ppm:-3.36_Ifit:78MatchedIso.:2			516120_:N-Ethyl-5-propyl-5-undecanamine_ppm:0.001_mzLogicScore:NA; 511403_:N-(2,2-Dimethylhexyl)-2,2-dimethyl-1-hexanamine_ppm:0.001_mzLogicScore:NA; 4930153_:Butyldihexylamine_ppm:0.001_mzLogicScore:NA; 14566128_:Hexyldecylamine_ppm:0.001_mzLogicScore:NA; 505824_:8-Hexadecanamine_ppm:0.001_mzLogicScore:NA; 360515_:Dodecylamine, N,N-diethyl-_ppm:0.001_mzLogicScore:NA; 7919_:1748246_ppm:0.001_mzLo…		~same in all
242.127	C11 H18 N2 O4	6.767		30000	60000	100000	30	6.66667	60	2	4	2	0.92	2	1.08	0.288651	0.0621202	0.267989	14	0	0			No matches found	No matches found	No matches found	No matches found	ddMS2 for preferred ion	C5 H19 N6 O3 P_ppm:4.22_Ifit:67MatchedIso.:2; C13 H23 P S_ppm:3.46_Ifit:78MatchedIso.:2; C11 H18 N2 O4_ppm:-0.04_Ifit:75MatchedIso.:2			67029429_:7-(2,4-Dioxotetrahydro-1(2H)-pyrimidinyl)heptanoic acid_ppm:0_mzLogicScore:19; 67172595_:3-(Allyloxy)-1-(2-hydroxypropyl)-5,5-dimethyl-2,4-imidazolidinedione_ppm:0_mzLogicScore:9; 4934966_:Methyl 4-(5-methoxy-5-oxopentyl)-4,5-dihydro-1H-pyrazole-3-carboxylate_ppm:0_mzLogicScore:29; 8880670_:Ethyl 5-[methoxy(methyl)carbamoyl]-3,6-dihydro-1(2H)-pyridinecarboxylate_ppm:0_mzLogicScore:14; 9…		Only in E+
242.188	C14 H26 O3	2.445		400000	60000	20000	50	66.6667	30	0.1	0.04	0.3	-2.85	-4.49	-1.64	0.0605204	0.0208317	0.280756	30	0	0			No matches found	No matches found	No matches found	No matches found	No MS2	C14 H26 O3_ppm:-0.73_Ifit:81MatchedIso.:2			67153101_:1,5-Dioxacyclohexadecan-2-one_ppm:0_mzLogicScore:NA; 67034083_:8-(3-Butyl-2-oxiranyl)octanoic acid_ppm:0_mzLogicScore:NA; 67156654_:4-Butyl-2-methoxy-2,6-dimethyl-3,5-heptanedione_ppm:0_mzLogicScore:NA; 67158815_:(2E)-3-Hydroxy-2-tetradecenoic acid_ppm:0_mzLogicScore:NA; 4521955_:(3E)-5-Hydroxy-5-isopropyl-6,6-dimethyl-3-hepten-2-yl acetate_ppm:0_mzLogicScore:NA; 4926182_:Ethyl 10-undec…		Highest in C
242.224	C15 H30 O2	2.108		4000000	3000000	2000000	50	6.66667	5	0.8	0.4	0.5	-0.26	-1.35	-1.09	0.879605	0.0881045	0.127778	69	0	0			No matches found	No matches found	No matches found	No matches found	ddMS2 for preferred ion	C15 H30 O2_ppm:-0.98_Ifit:76MatchedIso.:3			67153454_:2-Hydroxy-7-pentadecanone_ppm:0_mzLogicScore:38; 67035265_:Butyl 2-ethylnonanoate_ppm:0_mzLogicScore:36; 35015210_:2,6,10-Trimethyldodecanoic acid_ppm:0_mzLogicScore:37; 35015072_:2,10-Dimethyl-6-methylene-1,4-dodecanediol_ppm:0_mzLogicScore:36; 58837231_:(3S)-3-Hydroxy-4-pentadecanone_ppm:0_mzLogicScore:37; 67154861_:2-Undecanyl butyrate_ppm:0_mzLogicScore:36; 67164632_:2-Octanyl hepta…		Highest in C, messy
243.071	C6 H9 N7 O4	12.418		1000000	1000000	900000	60	2	33.3333	1	0.9	0.8	0.22	-0.15	-0.36	0.822909	0.997212	0.787427	17	10	0			No matches found	No matches found	No matches found	No matches found	ddMS2 for preferred ion	C6 H17 N3 O3 S2_ppm:0.3_Ifit:37MatchedIso.:2; C5 H13 N3 O8_ppm:3.88_Ifit:56MatchedIso.:2; C6 H19 N3 O P2 S_ppm:-4.94_Ifit:67MatchedIso.:2; C7 H20 N O2 P3_ppm:2.13_Ifit:74MatchedIso.:2; C8 H14 N5 P S_ppm:1.87_Ifit:77MatchedIso.:2; C14 H13 N O S_ppm:-2.38_Ifit:60MatchedIso.:2; C6 H9 N7 O4_ppm:-1.63_Ifit:67MatchedIso.:2	(5ξ,6α,7α,9ξ,16ξ)-16-(β-D-Glucopyranosyloxy)-6,7,17-trihydroxykauran-19-oic acid_simScore:95.2; Agnuside_simScore:95.2; Scutellarioside II_simScore:95.2; 4-[(β-D-Glucopyranosyloxy)methyl]-6,7-dihydroxy-7-(hydroxymethyl)-1,4a,5,6,7,7a-hexahydrocyclopenta[c]pyran-1-yl 3-methylbutanoate_simScore:95.4; Benzaldehyde 1-[2-(tert-butyl)-5-(trifluoromethyl)pyrazolo[1,5-a]pyrimidin-7-yl]hydrazone_simScore:…		67174297_:2-[(E)-(4-Methoxybenzylidene)amino]benzenethiol_ppm:0.001_mzLogicScore:NA; 67171821_:2-[(2-Methyl-2-propen-1-yl)sulfanyl]-3-quinolinecarbaldehyde_ppm:0.001_mzLogicScore:NA; 67493262_:8-Phenyl-4,6,7,8-tetrahydro-5H-thieno[3,2-b]azepin-5-one_ppm:0.001_mzLogicScore:NA; 62998011_:3-Ethoxy-10H-phenothiazine_ppm:0.001_mzLogicScore:NA; 29753475_:2-({[2-(Methylsulfanyl)phenyl]imino}methyl)pheno…		~same in all
243.256	C15 H33 N O	9.859		3000000	4000000	2000000	23.3333	75	15	2	0.8	0.5	0.64	-0.35	-0.99	0.890946	0.913937	0.688815	6	0	0			No matches found	No matches found	No matches found	No matches found	ddMS2 for preferred ion	C15 H33 N O_ppm:-2.97_Ifit:79MatchedIso.:3			67153406_:2-(2-Dodecanyloxy)-N-methylethanamine_ppm:0.001_mzLogicScore:NA; 13433897_:1-(Dodecyloxy)-1-propanamine_ppm:0.001_mzLogicScore:NA; 4930627_:N-Hexyl-N-(2-methoxyethyl)-1-hexanamine_ppm:0.001_mzLogicScore:NA; 2284227_:1-(Dodecylamino)-2-propanol_ppm:0.001_mzLogicScore:NA; 111052_:Dimethyl(2-tridecanyl)amine oxide_ppm:0.001_mzLogicScore:NA; 59037_:Laurixamine_ppm:0.001_mzLogicScore:NA		~same in all
244.066	C5 H8 N8 O4	13.395		60000	90000	200000	16.6667	4.44444	15	1	3	2	0.52	1.58	1.07	0.171689	0.0102749	0.0317057	14	1	0			No matches found	No matches found	No matches found	No matches found	ddMS2 for preferred ion	C14 H13 O2 P_ppm:4.57_Ifit:55MatchedIso.:2; C5 H18 N4 O P2 S_ppm:-5.01_Ifit:71MatchedIso.:2; C4 H12 N4 O8_ppm:3.77_Ifit:60MatchedIso.:3; C6 H19 N2 O2 P3_ppm:2.03_Ifit:87MatchedIso.:2; C7 H13 N6 P S_ppm:1.77_Ifit:98MatchedIso.:2; C13 H12 N2 O S_ppm:-2.46_Ifit:59MatchedIso.:2; C5 H8 N8 O4_ppm:-1.71_Ifit:66MatchedIso.:3	N1-(2-Pyridylmethyl)-4-methylbenzene-1-sulfonamide_simScore:78.3		65999223_:1-Methyl-1,4-dihydro[1]benzothieno[2,3-b]pyridine-3-carboxamide_ppm:0.001_mzLogicScore:18; 67024565_:2-(3H-Naphtho[1,2-d]imidazol-2-ylsulfanyl)ethanol_ppm:0.001_mzLogicScore:15; 525319_:4-(2-Hydroxyethylamino)-1-naphthyl thiocyanate_ppm:0.001_mzLogicScore:19; 24735740_:O-(4-Pyridinylmethyl) phenylcarbamothioate_ppm:0.001_mzLogicScore:16; 3878573_:1-Hydroxy-1,3-diphenylthiourea_ppm:0.001…		Highest in E+, present in C and E-
244.116	C9 H16 N4 O4	11.31		400000	200000	10000	25	25	50	0.6	0.04	0.07	-0.8	-4.65	-3.85	0.374375	0.004787	0.00803424	5	1	0			No matches found	No matches found	No matches found	No matches found	ddMS2 for preferred ion	C11 H21 N2 P S_ppm:0.44_Ifit:73MatchedIso.:2; C9 H16 N4 O4_ppm:-3.04_Ifit:82MatchedIso.:2	Drofenine_simScore:64.5		67495953_:(1R,2R,3S,4S,5R,6S)-5,6-Dihydroxybicyclo[2.2.1]heptane-2,3-dicarbohydrazide_ppm:0.001_mzLogicScore:NA; 67496086_:(1R,2R,3S,4S,5S,6S)-5,6-Dihydroxybicyclo[2.2.1]heptane-2,3-dicarbohydrazide_ppm:0.001_mzLogicScore:NA; 4517283_:(2Z,2'Z)-N,N'-[Methylenebis(oxy)]bis(3-nitroso-2-buten-2-amine)_ppm:0.001_mzLogicScore:NA; 65998162_:N,N'-Dicarbamoyl-2,2-diethylmalonamide_ppm:0.001_mzLogicScore:N…		Present in C > E-, absent in E+
244.153	C10 H20 N4 O3	10.508		4000000	2000000	3000000	25	50	3	0.6	0.8	2	-0.86	-0.26	0.6	0.392007	0.935277	0.535723	0	0	0			No matches found	No matches found	No matches found	No matches found	ddMS2 for preferred ion	C10 H20 N4 O3_ppm:-2.66_Ifit:58MatchedIso.:4					~same in all
244.178	C12 H24 N2 O3	7.047		30000	10000	200000	66.6667	40	50	0.4	7	20	-1.28	2.73	4	0.780643	0.162969	0.0943977	22	0	0			No matches found	No matches found	No matches found	No matches found	No MS2	C12 H24 N2 O3_ppm:-2.6_Ifit:89MatchedIso.:2			67154086_:2-(2-Amino-2-oxoethoxy)-N,N-bis(2-methyl-2-propanyl)acetamide_ppm:0.001_mzLogicScore:NA; 67493173_:2-Methyl-2-propanyl (4-aminobutyl)(3-oxopropyl)carbamate_ppm:0.001_mzLogicScore:NA; 67167571_:2-(2-Amino-2-oxoethoxy)decanamide_ppm:0.001_mzLogicScore:NA; 66424413_:(2S)-2-Amino-4-methylpentanoic anhydride (non-preferred name)_ppm:0.001_mzLogicScore:NA; 460006_:Butyl N~2~-acetyllysinate_pp…		Probably only in E+
245.033	C5 H7 N7 O3 S	7.445		200000	70000	10000	30	28.5714	60	0.4	0.08	0.2	-1.28	-3.58	-2.3	0.199799	0.0145945	0.0470629	7	0	0			No matches found	No matches found	No matches found	No matches found	ddMS2 for preferred ion	C13 H3 N5 O_ppm:-4.32_Ifit:60MatchedIso.:2; C13 H11 N S2_ppm:-2.41_Ifit:60MatchedIso.:2; C12 H7 N O5_ppm:1.14_Ifit:63MatchedIso.:2; C7 H4 N9 P_ppm:-0.11_Ifit:82MatchedIso.:2; C6 H18 N O P3 S_ppm:2.07_Ifit:88MatchedIso.:2; C4 H11 N3 O7 S_ppm:3.8_Ifit:95MatchedIso.:2; C4 H13 N3 O5 P2_ppm:-1.4_Ifit:94MatchedIso.:2; C5 H7 N7 O3 S_ppm:-1.66_Ifit:94MatchedIso.:2			66000802_:[(Dichlorosilyl)imino](diethyl)propylphosphorane_ppm:0_mzLogicScore:7; 67170935_:2,4,6-Triazido-5-fluoronicotinonitrile_ppm:0_mzLogicScore:12; 67155482_:9,9(10H)-Acridinedithiol_ppm:0.001_mzLogicScore:19; 7877574_:2H-Furo[2,3-H]chromene-2,8,9-trione, 4-methyl-, 8-oxime_ppm:0_mzLogicScore:24; 21107176_:3-(Methylsulfanyl)-4-(2-propyn-1-ylsulfanyl)quinoline_ppm:0.001_mzLogicScore:14; 49123…		Highest in C, E-; also in E+ but lower
245.066	C6 H16 N O7 P	13.634		200000	100000	60000	100	30	116.667	0.5	0.2	0.5	-1.08	-2.02	-0.94	0.867442	0.375657	0.5932	9	0	0			No matches found	No matches found	No matches found	No matches found	ddMS2 for preferred ion	C8 H11 N3 O6_ppm:4.37_Ifit:60MatchedIso.:3; C6 H16 N O7 P_ppm:-2.38_Ifit:76MatchedIso.:3			66738990_:(1S)-1,4-Anhydro-1-(3,5-dioxo-2,3,4,5-tetrahydro-1,2,4-triazin-6-yl)-D-ribitol_ppm:-0.001_mzLogicScore:25; 471734_:1-Pentofuranosyl-1H-1,2,4-triazole-3-carboxylic acid_ppm:-0.001_mzLogicScore:34; 295602_:1,4-Anhydro-1-(5-carbamoyl-1,2,4-oxadiazol-3-yl)pentitol_ppm:-0.001_mzLogicScore:26; 65793383_:1-[(3R,4R,5R)-3,4-Dihydroxy-5-(hydroxymethyl)-1,2-oxazolidin-2-yl]-2,4(1H,3H)-pyrimidinedi…		~same in all; up in one C rep
245.126	C6 H16 N9 P	6.645		400000	200000	800000	5	2	25	0.6	2	3	-0.78	1.02	1.8	0.0759102	0.0401146	0.00808525	19	0	0			No matches found	No matches found	No matches found	No matches found	No MS2	C11 H19 N O5_ppm:-1.75_Ifit:68MatchedIso.:2; C6 H16 N9 P_ppm:-2.99_Ifit:74MatchedIso.:3			67030660_:1-[(2R)-2,4-Dihydroxy-3,3-dimethylbutanoyl]-L-proline_ppm:0_mzLogicScore:NA; 19761847_:2-Acetamido-1-allyl-1,5-anhydro-2-deoxyhexitol_ppm:0_mzLogicScore:NA; 65791967_:(3R)-3-Hydroxy-4,6-dioxo-3-[(trimethylammonio)methyl]heptanoate_ppm:0_mzLogicScore:NA; 66001285_:(1-Amino-2-methylpropyl)(2-methylbutanoyl)peroxyanhydride_ppm:0_mzLogicScore:NA; 67167792_:N-(3-Oxoheptanoyl)-L-homoserine_pp…		Highest in E+, really messy trace, looks also present in C, maybe in E-
245.177		2.197		100000	60000	50000	100	33.3333	6	0.4	0.4	0.9	-1.25	-1.44	-0.19	0.677179	0.599602	0.987178	45	9	0			No matches found	No matches found	No matches found	No matches found	ddMS2 for preferred ion		PPG Acrylate n13_simScore:60.7; PPG Acrylate n5_simScore:62.5; PPG Acrylate n12_simScore:62.6; PPG Acrylate n11_simScore:62.6; PPG Acrylate n8_simScore:62.7; PPG Acrylate n9_simScore:62.8; PPG Acrylate n10_simScore:62.9; PPG Acrylate n7_simScore:79; PPG Acrylate n6_simScore:79.3		58837685_:2-Heptyl-1,4-dihydro-4-quinolinol_ppm:0.001_mzLogicScore:10; 67025670_:1-Heptyl-1,2-dihydro-4-quinolinol_ppm:0.001_mzLogicScore:10; 67495757_:2-Methoxy-5,5a-dimethyl-5,5a,6,7,8,9,10,10a-octahydrocyclohepta[b]indole_ppm:0.001_mzLogicScore:13; 59650547_:(2E)-N-(2-Methylbutyl)-2-undecene-8,10-diynamide_ppm:0.001_mzLogicScore:10; 487617_:Methyl (1Z)-N-cyclohexyl-3-phenylpropanimidate_ppm:0.…		~same in all
246.085	C9 H14 N2 O6	8.876		50000	100000	400000	6	0.2	10	2	8	4	0.91	2.94	2.03	0.00376074	2.35393e-05	0.000362149	7	0	0			No matches found	No matches found	No matches found	No matches found	ddMS2 for preferred ion	C4 H11 N10 O P_ppm:-2.37_Ifit:100MatchedIso.:1; C11 H21 P3_ppm:-2.85_Ifit:80MatchedIso.:2; C11 H19 O2 P S_ppm:2.32_Ifit:58MatchedIso.:3; C9 H14 N2 O6_ppm:-1.13_Ifit:58MatchedIso.:3			67031151_:N,O-Diacetyl-L-serylglycine_ppm:0_mzLogicScore:12; 67154182_:1-{(1R)-1-[(1,3-Dihydroxy-2-propanyl)oxy]-2-hydroxyethyl}-2,4(1H,3H)-pyrimidinedione_ppm:0_mzLogicScore:12; 4521903_:(5Z)-3-[(2,3-Dihydroxypropoxy)methyl]-5-[hydroxy(methoxy)methylene]-1,5-dihydro-4H-pyrazol-4-one_ppm:0_mzLogicScore:21; 35032068_:alpha-Aspartyl-4-hydroxyproline_ppm:0_mzLogicScore:24; 471597_:1-{[(1,3,4-Trihydr…		very abundant in E+, may be present in low amounts in both C and E-
246.146	C12 H22 O5	2.075		600000	500000	4000000	16.6667	40	125	0.8	6	8	-0.36	2.61	2.97	0.966691	0.709207	0.582904	12	9	0			No matches found	No matches found	No matches found	No matches found	ddMS2 for preferred ion	C12 H22 O5_ppm:-2.62_Ifit:78MatchedIso.:3	PPG Acrylate n13_simScore:60.7; PPG Acrylate n5_simScore:62.5; PPG Acrylate n12_simScore:62.6; PPG Acrylate n11_simScore:62.6; PPG Acrylate n8_simScore:62.7; PPG Acrylate n9_simScore:62.8; PPG Acrylate n10_simScore:62.9; PPG Acrylate n7_simScore:79; PPG Acrylate n6_simScore:79.3		15078426_:Oxybis(methylene) bis(2,2-dimethylpropanoate)_ppm:0.001_mzLogicScore:9; 67169887_:1,2,3-Trihydroxy-4,5-dodecanedione_ppm:0.001_mzLogicScore:11; 67169348_:Dimethyl (2S)-2-hydroxydecanedioate_ppm:0.001_mzLogicScore:11; 479639_:1,2-Dibutyroxy-1-ethoxyethane_ppm:0.001_mzLogicScore:18; 17226058_:ascr#2_ppm:0.001_mzLogicScore:20; 505425_:6-Hydroxydodecanedioic acid_ppm:0.001_mzLogicScore:9; 1…		~same in all; up in one E+ rep
247.051	C4 H10 N9 P S	6.789		100000	20000	20000	70	50	35	0.1	0.2	1	-3.16	-2.58	0.58	0.0523615	0.100502	0.649945	4	0	0			No matches found	No matches found	No matches found	No matches found	No MS2	C11 H10 N3 O2 P_ppm:0.27_Ifit:69MatchedIso.:2; C5 H11 N7 O P2_ppm:4.45_Ifit:97MatchedIso.:2; C10 H17 N S3_ppm:-4.78_Ifit:51MatchedIso.:3; C9 H13 N O5 S_ppm:-1.27_Ifit:65MatchedIso.:3; C4 H10 N9 P S_ppm:-2.5_Ifit:69MatchedIso.:3			67172406_:Ethyl (5,6-dihydroxy-4-sulfinyl-1,4,5,6-tetrahydro-2-pyridinyl)acetate_ppm:0_mzLogicScore:NA; 21233674_:3-methoxytyramine sulfate_ppm:0_mzLogicScore:NA; 113503_:2-Hydroxy-4-[2-(methylamino)ethyl]phenyl hydrogen sulfate_ppm:0_mzLogicScore:NA; 113502_:2-Hydroxy-5-[2-(methylamino)ethyl]phenyl hydrogen sulfate_ppm:0_mzLogicScore:NA		up in C
247.064	C9 H15 Cl N3 O P	11.116		500000	500000	300000	40	1.6	26.6667	1	0.5	0.5	0.19	-0.93	-1.12	0.85284	0.328054	0.20115	36	1	0			No matches found	No matches found	No matches found	No matches found	ddMS2 for preferred ion	C9 H9 N7 S_ppm:-0.08_Ifit:51MatchedIso.:2; C4 H13 N3 O9_ppm:-4.8_Ifit:76MatchedIso.:2; C8 H15 N3 O2 P2_ppm:0.18_Ifit:54MatchedIso.:2; C9 H15 Cl N3 O P_ppm:-0.54_Ifit:57MatchedIso.:3	Triflusulfuron-methyl_simScore:74.7		67035485_:1H-Naphtho[2,3-g]indole-6,11-dione_ppm:-0.001_mzLogicScore:NA; 67035845_:2-Amino-1-ethynyl-9,10-anthraquinone_ppm:-0.001_mzLogicScore:NA; 67176442_:1-Pyrenyl nitrite_ppm:-0.001_mzLogicScore:NA; 67171893_:1H-Naphtho[2,3-f]indole-4,11-dione_ppm:-0.001_mzLogicScore:NA; 67172229_:4H-Pyrano[2,3-a]acridin-4-one_ppm:-0.001_mzLogicScore:NA; 67490295_:4H-Naphtho[2,3-f]indole-5,10-dione_ppm:-0.00…		~same in all Rxes
247.064	C9 H15 Cl N3 O P	9.544		300000	400000	300000	3.33333	5	23.3333	1	0.9	0.7	0.41	-0.2	-0.61	0.264057	0.606686	0.111364	36	0	0			No matches found	No matches found	No matches found	No matches found	ddMS2 for preferred ion	C4 H13 N3 O9_ppm:-3.89_Ifit:100MatchedIso.:1; C16 H9 N O2_ppm:3.6_Ifit:55MatchedIso.:2; C9 H9 N7 S_ppm:0.82_Ifit:86MatchedIso.:2; C8 H15 N3 O2 P2_ppm:1.08_Ifit:89MatchedIso.:2; C10 H15 Cl2 N3_ppm:-0.34_Ifit:44MatchedIso.:4; C9 H15 Cl N3 O P_ppm:0.37_Ifit:75MatchedIso.:4			67035485_:1H-Naphtho[2,3-g]indole-6,11-dione_ppm:-0.001_mzLogicScore:35; 67035845_:2-Amino-1-ethynyl-9,10-anthraquinone_ppm:-0.001_mzLogicScore:35; 67176442_:1-Pyrenyl nitrite_ppm:-0.001_mzLogicScore:33; 67171893_:1H-Naphtho[2,3-f]indole-4,11-dione_ppm:-0.001_mzLogicScore:36; 67172229_:4H-Pyrano[2,3-a]acridin-4-one_ppm:-0.001_mzLogicScore:36; 67490295_:4H-Naphtho[2,3-f]indole-5,10-dione_ppm:-0.00…		~same in all Rxes
249.043	C8 H15 N3 S3	22.162		500000	500000	300000	40	8	2	1	0.6	0.6	0.1	-0.75	-0.85	0.893918	0.229983	0.155621	4	0	0			No matches found	No matches found	No matches found	No matches found	ddMS2 for preferred ion	C7 H11 N3 O5 S_ppm:4.2_Ifit:81MatchedIso.:2; C8 H7 N7 O S_ppm:-1.17_Ifit:75MatchedIso.:2; C7 H13 N3 O3 P2_ppm:-0.91_Ifit:81MatchedIso.:2; C8 H15 N3 S3_ppm:0.72_Ifit:62MatchedIso.:3			67033413_:(3Z)-3,5,5,5-Tetrafluoro-4-(fluoromethyl)-2-methyl-3-penten-2-yl nitrate_ppm:-0.001_mzLogicScore:NA; 67171011_:Anthra[2,1-d][1,3]oxazole-6,11-dione_ppm:0_mzLogicScore:NA; 538206_:5-(4-Fluorophenoxy)-2-nitrophenol_ppm:0.001_mzLogicScore:NA; 322904_:Anthra[1,2-c][1,2]oxazole-6,11-dione_ppm:0_mzLogicScore:NA		~same in all Rxes
249.085	C10 H11 N5 O3	7.325		80000	50000	200000	25	40	35	0.7	2	3	-0.57	1.16	1.73	0.554761	0.214777	0.0864495	20	22	0			No matches found	No matches found	No matches found	No matches found	ddMS2 for preferred ion	C4 H12 N9 O2 P_ppm:1.43_Ifit:100MatchedIso.:1; C10 H19 N O2 S2_ppm:-0.83_Ifit:36MatchedIso.:3; C9 H15 N O7_ppm:2.66_Ifit:79MatchedIso.:3; C10 H11 N5 O3_ppm:-2.71_Ifit:63MatchedIso.:3	Nicotinic acid adenine dinucleotide_simScore:73.8; Zeatin-7-N-glucoside_simScore:78.3; S-Adenosylmethionine_simScore:79.4; Adenosine 5'-monophosphate_simScore:84.3; Nicotinamide adenine dinucleotide (NAD+)_simScore:84.5; Adenosine triphosphate (ATP)_simScore:84.8; Cyclic ADP-ribose_simScore:85.3; Nicotinamide adenine dinucleotide phosphate (NADP+)_simScore:85.3; 2'-O-Methyladenosine_simScore:85.4…		65792863_:2-C-(Acryloylamino)-D-glucose_ppm:-0.001_mzLogicScore:26; 65793878_:(2R,3S,4R,5R)-N-Acryloyl-2,3,4,5,6-pentahydroxyhexanamide (non-preferred name)_ppm:-0.001_mzLogicScore:26; 66000767_:N-(2,5-Dioxo-1-pyrrolidinyl)-6-hydrazinonicotinamide_ppm:0.001_mzLogicScore:15; 67495783_:(1R,11S,13S)-7-Amino-15-oxa-2,4,6,9-tetraazatetracyclo[10.2.1.0~2,10~.0~3,8~]pentadeca-3,5,7,9-tetraene-11,13-diol…		Highest in E+, present in all 3
251.115	C7 H18 N5 O3 P	6.95		20000	80000	50000	50	87.5	14	4	3	0.6	2.17	1.53	-0.63	0.262753	0.347896	0.948652	56	0	0			No matches found	No matches found	No matches found	No matches found	No MS2	C7 H18 N5 O3 P_ppm:2.75_Ifit:100MatchedIso.:1			67029342_:1-(D-Ribofuranosyl)indoline_ppm:0_mzLogicScore:NA; 67039043_:Methyl 3-hydroxy-4,4-dimethyl-5-phenyl-1,3-oxazolidine-2-carboxylate_ppm:0_mzLogicScore:NA; 65999750_:Dimethyl (2Z)-2-(5-ethyl-1-methyl-1H-pyrrol-2-yl)-2-butenedioate_ppm:0_mzLogicScore:NA; 67024471_:Ethyl 3-(2-ethoxy-6-methyl-3-pyridinyl)-3-oxopropanoate_ppm:0_mzLogicScore:NA; 66737890_:N-Acetyl-N-(4-methoxybenzyl)-L-alanine_…		~same in all; reps don't agree well
251.92		21.816		1000000	1000000	700000	7	10	0.714286	0.9	0.6	0.7	-0.11	-0.72	-0.62	0.581521	0.0110748	0.0175457	3	0	0			No matches found	No matches found	No matches found	No matches found	ddMS2 for preferred ion				276058_:1-Chloro-4-(iodomethyl)benzene_ppm:0_mzLogicScore:NA; 91309_:2-Iodobenzyl chloride_ppm:0_mzLogicScore:NA; 125065_:4-Chloro-2-iodo-1-methylbenzene_ppm:0_mzLogicScore:NA		~same in all Rxes
251.946	C2 H N6 O5 P S	21.816		300000	300000	200000	10	6.66667	4	1	0.7	0.7	-0.01	-0.48	-0.47	0.996845	0.0528133	0.0554099	2	0	0			No matches found	No matches found	No matches found	No matches found	ddMS2 for preferred ion	C2 H N6 O5 P S_ppm:-1.15_Ifit:100MatchedIso.:1			65998915_:(3-Chloropropyl)(3,3,3-trichloropropyl)silane_ppm:0_mzLogicScore:NA; 105855_:Bis(3-chloropropyl)dichlorosilane_ppm:0_mzLogicScore:NA		~same in all Rxes
252.113	C9 H20 N2 O4 S	8.544		60000	60000	20000	116.667	8.33333	20	1	0.3	0.3	0.01	-1.75	-1.77	0.829161	0.798437	0.50012	4	0	0			No matches found	No matches found	No matches found	No matches found	No MS2	C5 H18 N8 P2_ppm:1.93_Ifit:60MatchedIso.:2; C13 H12 N6_ppm:4.39_Ifit:73MatchedIso.:2; C11 H25 P S2_ppm:-0.31_Ifit:83MatchedIso.:2; C11 H17 N4 O P_ppm:-2.17_Ifit:83MatchedIso.:2; C10 H21 O5 P_ppm:3.14_Ifit:88MatchedIso.:2; C9 H20 N2 O4 S_ppm:-3.68_Ifit:75MatchedIso.:3			62895975_:4-(Diethoxyphosphoryl)butyl acetate_ppm:-0.001_mzLogicScore:NA; 199405_:NSC 22423_ppm:-0.001_mzLogicScore:NA; 247668_:Ethyl 4-(diethoxyphosphoryl)butanoate_ppm:-0.001_mzLogicScore:NA; 76886_:HEPPS_ppm:0.001_mzLogicScore:NA		~same in all; up in one C rep
252.169	C11 H20 N6 O	7.496		10000	10000	50000	40	10	60	0.7	4	5	-0.46	1.82	2.28	0.733437	0.104652	0.0601092	2	0	0			No matches found	No matches found	No matches found	No matches found	No MS2	C10 H24 N2 O5_ppm:2.96_Ifit:72MatchedIso.:2; C11 H20 N6 O_ppm:-2.35_Ifit:73MatchedIso.:3			536165_:Methyl 4,6-bis(isopropylamino)-1,3,5-triazine-2-carboximidate_ppm:0.001_mzLogicScore:NA; 65324046_:1-[4-Amino-5-(2-cyano-1-pyrrolidinyl)-5-oxopentyl]guanidine_ppm:0.001_mzLogicScore:NA		Highest in E+, there in C and E- as well?
253.152	C10 H23 N O6	7.229		10000	40000	100000	90	20	10	4	9	2	1.98	3.21	1.22	0.109418	0.0361857	0.343231	0	0	0			No matches found	No matches found	No matches found	No matches found	No MS2	C5 H20 N9 O P_ppm:-4.07_Ifit:100MatchedIso.:1; C10 H23 N O6_ppm:-2.87_Ifit:79MatchedIso.:2					Moderately up in E+
254.089	C11 H14 N2 O5	17.908		800000	500000	3000000	12.5	20	33.3333	0.6	3	5	-0.8	1.64	2.44	0.370253	0.108261	0.0376479	23	18	0			No matches found	No matches found	No matches found	No matches found	ddMS2 for preferred ion	C13 H19 O P S_ppm:0.37_Ifit:45MatchedIso.:3; C11 H14 N2 O5_ppm:-2.97_Ifit:65MatchedIso.:4	1,5-Dimethyl-N-[4-(1,3-oxazol-5-yl)phenyl]-1H-pyrazole-3-carboxamide_simScore:64.8; Metronidazole-OH_simScore:64.9; N-[(2-Chloro-6-fluorobenzyl)oxy]-2-cyano-3-(dimethylamino)acrylamide_simScore:84.3; 1-(2,4-Dimethyl-1,3-oxazol-5-yl)ethan-1-one 1-(2,4,6-trichlorophenyl)hydrazone_simScore:84.3; Methyl 2-cyano-3-(dimethylamino)acrylate_simScore:84.4; N1-Methyl-2-cyano-3-(dimethylamino)acrylamide_sim…		67032860_:2-Amino-3-(1-amino-3-methyl-2,5-dioxo-3-cyclohexen-1-yl)-2-methyl-3-oxopropanoic acid_ppm:0.001_mzLogicScore:25; 65792541_:2'-Deoxy-1'-vinyluridine_ppm:0.001_mzLogicScore:30; 14234583_:1-(2-Deoxy-2-methylenepentofuranosyl)-5-methyl-2,4(1H,3H)-pyrimidinedione_ppm:0.001_mzLogicScore:32; 66424986_:(1xi)-1,4-Anhydro-1-(3-carbamoyl-2-pyridinyl)-D-ribitol_ppm:0.001_mzLogicScore:35; 67497680_:…		Highest in E+, present in C and E-
254.1	C9 H18 O8	11.603		9000	10000	100000	55.5556	70	4	2	10	9	0.72	3.81	3.09	0.505472	0.0143655	0.0257827	13	33	0			No matches found	No matches found	No matches found	No matches found	ddMS2 for preferred ion	C12 H19 N2 P S_ppm:-3.88_Ifit:39MatchedIso.:2; C13 H20 O P2_ppm:2.88_Ifit:71MatchedIso.:2; C6 H10 N10 O2_ppm:3.35_Ifit:32MatchedIso.:2; C9 H18 O8_ppm:-1.96_Ifit:95MatchedIso.:2	2-(4-Methyl-3-cyclohexen-1-yl)-2-propanyl 6-O-(6-deoxy-α-L-mannopyranosyl)-β-D-glucopyranoside_simScore:78; (1S,2S,8ξ,9β,16α,17ξ)-1-(β-D-Glucopyranosyloxy)-2,16,20-trihydroxy-9,10,14-trimethyl-11,22-dioxo-4,9-cyclo-9,10-secocholest-5-en-25-yl acetate_simScore:79; 8-Oxo-9-(3,4,5-trimethoxyphenyl)-5,5a,6,8,8a,9-hexahydrofuro[3',4':6,7]naphtho[2,3-d][1,3]dioxol-5-yl hexopyranoside_simScore:79.5; (3β…		67032408_:Ethyl (2S,3R,4R,5S,6S)-2,3,4,5,6,7-hexahydroxyheptanoate_ppm:0.001_mzLogicScore:52; 67160732_:(1xi)-1,5-Anhydro-1-(1,2,3-trihydroxy-2-propanyl)-D-galactitol_ppm:0.001_mzLogicScore:46; 29369464_:2,3-Dihydroxypropyl D-galactopyranoside_ppm:0.001_mzLogicScore:61; 8396152_:2,3-Dihydroxypropyl beta-D-glucopyranoside_ppm:0.001_mzLogicScore:61; 9981874_:(2S)-2,3-Dihydroxypropyl beta-D-galactop…		High in E+, way below threshold in E- and C (not sure if real)
255.073	C11 H13 N O6	11.671		100000	30000	20000	50	20	50	0.3	0.2	0.7	-1.88	-2.5	-0.62	0.142602	0.0625901	0.563929	5	3	0			No matches found	No matches found	No matches found	No matches found	ddMS2 for preferred ion	C6 H10 N9 O P_ppm:-4.27_Ifit:100MatchedIso.:1; C5 H14 N5 O5 P_ppm:0.97_Ifit:100MatchedIso.:1; C7 H19 N3 O P2 S_ppm:4.3_Ifit:50MatchedIso.:2; C11 H13 N O6_ppm:-3.07_Ifit:88MatchedIso.:2	21-Desacetyl deflazacort_simScore:65.7; 6β-Hydroxy-21-desacetyl deflazacort_simScore:66.6; (3,5-Dimethylisoxazol-4-yl)[4-(2-methoxyphenyl)piperazino]methanone_simScore:88.2		67490363_:3-[2-Formyl-5-(hydroxymethyl)-1H-pyrrol-1-yl]pentanedioic acid_ppm:0.001_mzLogicScore:21; 67036107_:[1-Amino-2-(2,4-dihydroxyphenyl)ethyl]methylperoxyanhydride_ppm:0.001_mzLogicScore:37; 4522653_:Ethyl (5E)-5-[ethoxy(hydroxy)methylene]-2,6-dioxo-1,2,5,6-tetrahydro-3-pyridinecarboxylate_ppm:0.001_mzLogicScore:23; 530556_:2-(4,5-Dimethoxy-2-nitrophenyl)-1,3-dioxolane_ppm:0.001_mzLogicScor…		up in C
256.066	C5 H12 N4 O8	10.732		100000	200000	100000	1	0.4	30	1	1	0.7	0.53	0.04	-0.49	0.14286	0.993883	0.155677	33	0	0			No matches found	No matches found	No matches found	No matches found	ddMS2 for preferred ion	C8 H13 N6 P S_ppm:1.57_Ifit:64MatchedIso.:2; C7 H19 N2 O2 P3_ppm:1.82_Ifit:68MatchedIso.:2; C6 H8 N8 O4_ppm:-1.74_Ifit:73MatchedIso.:2; C6 H16 N4 O3 S2_ppm:0.09_Ifit:73MatchedIso.:2; C5 H12 N4 O8_ppm:3.48_Ifit:77MatchedIso.:2			67034008_:2-(Ethylamino)-3H-phenothiazin-3-one_ppm:0.001_mzLogicScore:NA; 67025569_:1-(Methylamino)-10H-phenothiazine-10-carbaldehyde_ppm:0.001_mzLogicScore:NA; 67490882_:N-{(E)-[4-(Methylsulfanyl)phenyl]methylene}nicotinamide_ppm:0.001_mzLogicScore:NA; 67491554_:1,2-Dihydrobenzo[h]quinazolin-2-ylethanethioic O-acid_ppm:0.001_mzLogicScore:NA; 67161969_:3-Oxo-N-phenyl-3-(2-pyridinyl)propanethioami…		~same in all Rxes
256.115	C13 H22 O P2	2.138		90000	70000	30000	111.111	10	16.6667	0.8	0.4	0.5	-0.28	-1.38	-1.1	0.956333	0.807658	0.660252	1	6	0			No matches found	No matches found	No matches found	No matches found	ddMS2 for preferred ion	C6 H12 N10 O2_ppm:2.68_Ifit:100MatchedIso.:1; C9 H20 O8_ppm:-2.58_Ifit:57MatchedIso.:2; C13 H22 O P2_ppm:2.22_Ifit:65MatchedIso.:2	2-Fluoro palmitic acid_simScore:94.4; Δ2-cis-Hexadecenoic acid_score:99.3; cis-7-Hexadecenoic acid_score:99.3; Palmitoleic acid_score:99.3; Δ2-trans-Hexadecenoic acid_score:99.3; Palmitelaidic acid_score:99.3		366629_:3,3'-(1,6-Hexanediyl)bis(5-oxo-2,5-dihydro-1,2,3-oxadiazol-3-ium)_ppm:0.001_mzLogicScore:25		~same in all
256.24	C16 H32 O2	2.114		30000000	20000000	6000000	66.6667	25	11.6667	0.7	0.2	0.3	-0.57	-2.18	-1.61	0.890409	0.157077	0.233982	65	5	0			No matches found	No matches found	No matches found	No matches found	ddMS2 for other ion	C16 H32 O2_ppm:-0.76_Ifit:70MatchedIso.:4	Ascorbyl palmitate_simScore:85.8; R-Palmitoyl-(1-methyl) Ethanolamide_simScore:87.2; Ethyl myristate_simScore:87.2; Sorbitan monopalmitate_simScore:87.3; 2-Amino-1,3,4-octadecanetriol_simScore:88.1		67038590_:(2S)-2-Tetradecanyl acetate_ppm:0_mzLogicScore:46; 67173711_:8,8-Diisopropoxy-2,6-dimethyl-2-octene_ppm:0_mzLogicScore:27; 67159822_:(2R)-2-Hexanyl decanoate_ppm:0_mzLogicScore:40; 67160422_:(2S)-2-Hexanyl decanoate_ppm:0_mzLogicScore:40; 21375887_:9,13-Dimethyltetradecanoic acid_ppm:0_mzLogicScore:47; 11271262_:2,13-Dimethyltetradecanoic acid_ppm:0_mzLogicScore:47; 11271454_:8-Methylpe…		Highest in C
257.1	C10 H15 N3 O5	10.575		200000	80000	100000	20	25	50	0.5	0.7	2	-1.13	-0.45	0.68	0.130008	0.515161	0.376184	34	6	0			No matches found	No matches found	No matches found	No matches found	ddMS2 for preferred ion	C4 H16 N7 O4 P_ppm:1.1_Ifit:100MatchedIso.:1; C6 H21 N5 P2 S_ppm:4.4_Ifit:66MatchedIso.:2; C12 H20 N O P S_ppm:0.39_Ifit:87MatchedIso.:2; C10 H15 N3 O5_ppm:-2.91_Ifit:97MatchedIso.:2	Gonyautoxin-6_simScore:87.2; Neosaxitoxin_simScore:88.6; 2,4-Dimethoxybenzaldehyde 1-(4-methyl-6-oxo-1,6-dihydropyrimidin-2-yl)hydrazone_simScore:88.6; Decarbamoyl-neosaxitoxin_simScore:88.7; Sulfamonomethoxine_simScore:88.8; 5-Methylcytosine_score:70		67033688_:2-Amino-5-methyl-1-(beta-D-xylofuranosyl)-4(1H)-pyrimidinone_ppm:0.001_mzLogicScore:29; 29354171_:1,4-Di-O-acetyl-3-azido-2,3,6-trideoxy-beta-L-lyxo-hexopyranose_ppm:0.001_mzLogicScore:13; 67492449_:4-Amino-1-(3-deoxy-beta-D-erythro-hex-2-ulofuranosyl)-2(1H)-pyrimidinone_ppm:0.001_mzLogicScore:33; 19201287_:4-Amino-1-[(5xi)-6-deoxy-beta-D-ribo-hexofuranosyl]-2(1H)-pyrimidinone_ppm:0.001…		~same in all
259.033	C12 H10 N3 P S	6.809		20000	200000	30000	45	20	10	10	1	0.2	3.26	0.54	-2.72	0.0054894	0.357361	0.00963781	0	0	0			No matches found	No matches found	No matches found	No matches found	No MS2	C3 H10 N5 O7 P_ppm:3.49_Ifit:100MatchedIso.:1; C4 H6 N9 O3 P_ppm:-1.67_Ifit:100MatchedIso.:1; C9 H9 N O8_ppm:-0.49_Ifit:84MatchedIso.:2; C13 H11 N O P2_ppm:4.26_Ifit:90MatchedIso.:2; C10 H13 N O3 S2_ppm:-3.84_Ifit:91MatchedIso.:2; C12 H10 N3 P S_ppm:-2.38_Ifit:94MatchedIso.:2					Highest in E-, present in C and E+
260.198	C14 H28 O4	2.87		300000	20000	20000	33.3333	100	20	0.09	0.06	0.7	-3.49	-3.95	-0.46	0.0409013	0.034702	0.956086	7	0	0			No matches found	No matches found	No matches found	No matches found	No MS2	C14 H28 O4_ppm:-1.58_Ifit:72MatchedIso.:2			13775598_:2,3-Dihydroxytetradecanoic acid_ppm:0_mzLogicScore:NA; 67026967_:2,3-Dihydroxy-12-methyltridecanoic acid_ppm:0_mzLogicScore:NA; 8236722_:1,1-Bis(methylperoxy)cyclododecane_ppm:0_mzLogicScore:NA; 4446050_:Ipurolic Acid_ppm:0_mzLogicScore:NA; 468353_:2-(tert-Butylperoxy)-2-ethylbutyl butyrate_ppm:0_mzLogicScore:NA; 474565_:Butyl dibutoxyacetate_ppm:0_mzLogicScore:NA; 68836_:MFCD00084800_p…		up in C
261.912	C2 H5 N2 O5 P3 S	22.133		200000	100000	70000	3	30	10	0.9	0.5	0.5	-0.22	-1.13	-0.91	0.505933	0.0187549	0.0355297	2	0	0			No matches found	No matches found	No matches found	No matches found	ddMS2 for preferred ion	C2 H5 N2 O5 P3 S_ppm:-3.12_Ifit:69MatchedIso.:3			28674840_:3-Chloro-1,1,3,3-tetrafluoro-2-oxopropyl sulfurofluoridate_ppm:0_mzLogicScore:NA; 67702_:477013_ppm:0_mzLogicScore:NA		~same in all Rxes
262.066	C11 H10 N4 O4	12.14		60000	100000	200000	6.66667	20	5	2	3	2	0.64	1.63	0.99	0.0632042	0.00452496	0.0182244	10	1	0	92.4		No matches found	No matches found	No matches found	No matches found	ddMS2 for preferred ion	C5 H14 N2 O10_ppm:3.23_Ifit:68MatchedIso.:2; C8 H15 N4 O2 P S_ppm:1.36_Ifit:89MatchedIso.:2; C16 H11 N2 P_ppm:-1.13_Ifit:62MatchedIso.:2; C14 H14 O3 S_ppm:-2.58_Ifit:68MatchedIso.:2; C6 H10 N6 O6_ppm:-1.88_Ifit:78MatchedIso.:2; C8 H17 N4 P3_ppm:-3.5_Ifit:90MatchedIso.:2	Carbadox_score:92.4		515261_:2-[(Benzylsulfanyl)(hydroxy)methylene]-1,3-cyclohexanedione_ppm:0.001_mzLogicScore:NA; 488715_:Bis(4-methylphenyl) sulfite_ppm:0.001_mzLogicScore:NA; 495364_:2-[(1-Phenylethyl)sulfonyl]phenol_ppm:0.001_mzLogicScore:NA; 498854_:2-Isopropoxyphenyl 2-thiophenecarboxylate_ppm:0.001_mzLogicScore:NA; 9600372_:2-(3,4-Dimethoxyphenyl)-1-(2-thienyl)ethanone_ppm:0.001_mzLogicScore:NA; 453873_:2,2'-…		Only in E+, low abundance
264.168	C11 H24 N2 O5	7.643		1000000	1000000	1000000	4	30	3	1	1	1	0.06	0.22	0.16	0.98571	0.646072	0.729703	6	2	0			No matches found	No matches found	No matches found	No matches found	ddMS2 for preferred ion	C13 H29 O P S_ppm:0.45_Ifit:75MatchedIso.:2; C6 H21 N10 P_ppm:-3.92_Ifit:49MatchedIso.:3; C11 H24 N2 O5_ppm:-2.77_Ifit:86MatchedIso.:3	Zeatin-7-N-glucoside_simScore:78.3; trans-Zeatin_simScore:84.6		525393_:1-Dimethyl(3-chloropropyl)silyloxyoctane_ppm:0_mzLogicScore:14; 519316_:2-Ethyl-1-dimethyl(3-chloropropyl)silyloxyhexane_ppm:0_mzLogicScore:14; 490736_:4-Dimethyl(3-chloropropyl)silyloxyoctane_ppm:0_mzLogicScore:14; 482120_:6-Ethyl-3-dimethyl(chloromethyl)silyloxyoctane_ppm:0_mzLogicScore:14; 482503_:(Chloromethyl)(decyloxy)dimethylsilane_ppm:0_mzLogicScore:14; 485107_:10-Chlorodecyl trim…		~same in all
265.152	C11 H23 N O6	16.991		100000	60000	700000	10	66.6667	42.8571	0.6	7	10	-0.72	2.87	3.59	0.500069	0.0511388	0.0251048	1	0	0			No matches found	No matches found	No matches found	No matches found	ddMS2 for preferred ion	C11 H23 N O6_ppm:-2.34_Ifit:74MatchedIso.:3			11606489_:15-amino-4,7,10,13-tetraoxapentadecanoic acid_ppm:0.001_mzLogicScore:NA		High in E+, present in C and E-
266.051	C9 H11 N6 P S	10.651		20000	60000	200000	2	5	15	3	10	4	1.44	3.39	1.95	0.0025208	0.000150625	0.00108808	9	2	0			No matches found	No matches found	No matches found	No matches found	ddMS2 for preferred ion	C16 H11 O2 P_ppm:3.45_Ifit:67MatchedIso.:2; C6 H10 N4 O8_ppm:2.71_Ifit:64MatchedIso.:2; C8 H17 N2 O2 P3_ppm:1.12_Ifit:83MatchedIso.:2; C15 H10 N2 O S_ppm:-3_Ifit:71MatchedIso.:2; C7 H14 N4 O3 S2_ppm:-0.55_Ifit:76MatchedIso.:2; C7 H6 N8 O4_ppm:-2.31_Ifit:74MatchedIso.:2; C9 H11 N6 P S_ppm:0.88_Ifit:90MatchedIso.:2	Cytidine 5'-monophosphate (hydrate)_simScore:91.8; Cytidine_score:88.8		67031761_:1,1,1-Trinitro-2-(nitromethyl)pentane_ppm:-0.001_mzLogicScore:8; 67033662_:1,1,1,3-Tetranitrohexane_ppm:-0.001_mzLogicScore:8; 67170377_:2H-[1,2]Thiazino[6,5-a]acridine 1-oxide_ppm:0.001_mzLogicScore:16; 67169164_:3-(Thieno[2,3-b]pyridin-2-yl)-2H-1,2-benzoxazine_ppm:0.001_mzLogicScore:16; 10580352_:2-(1,2-Oxazol-5-yl)-10H-phenothiazine_ppm:0.001_mzLogicScore:17; 412634_:5H-Indolo[3,2-b]…		present in all samples, though most abundant in E+
267.096	C10 H13 N5 O4	10.221		30000	10000	200000	33.3333	100	50	0.4	5	10	-1.37	2.36	3.72	0.539214	0.403393	0.144266	65	8	0			No matches found	No matches found	No matches found	No matches found	ddMS2 for preferred ion	C4 H14 N9 O3 P_ppm:1.48_Ifit:100MatchedIso.:1; C10 H21 N O3 S2_ppm:-0.63_Ifit:42MatchedIso.:2; C12 H18 N3 P S_ppm:0.79_Ifit:82MatchedIso.:2; C9 H17 N O8_ppm:2.62_Ifit:90MatchedIso.:2; C10 H13 N5 O4_ppm:-2.38_Ifit:91MatchedIso.:2	Trimethoprim impurity B_simScore:97.5; Inosine-5'-monophosphate (IMP)_simScore:98.4; 2',3'-Dideoxyinosine_simScore:98.4; 4-Amino-N'-hydroxypyrimidine-5-carboximidamide_simScore:98.6; 2'-Deoxyinosine_score:78; Inosine_score:99.6; Allopurinol_score:99.7; Hypoxanthine_score:99.9		67038149_:(2S)-2-Amino-3-({(2R,3R,4R,5S)-5-[(1R)-1,2-dihydroxyethyl]-3,4-dihydroxytetrahydro-2-furanyl}oxy)propanoic acid (non-preferred name)_ppm:-0.001_mzLogicScore:17; 65792879_:(1xi)-1-(6-Amino-7H-purin-2-yl)-1,5-anhydro-D-xylitol_ppm:0.001_mzLogicScore:23; 65793521_:(1xi)-1-(6-Amino-7H-purin-2-yl)-1,5-anhydro-D-arabinitol_ppm:0.001_mzLogicScore:23; 65793564_:2-Amino-9-(2-deoxy-L-threo-pentof…		Highest in E+, but looks also present in C
267.132	C5 H18 N9 O2 P	9.724		7000	10000	200000	28.5714	20	100	2	20	10	0.69	4.55	3.86	0.765565	0.0455723	0.0728721	8	22	0			No matches found	No matches found	No matches found	No matches found	ddMS2 for preferred ion	C11 H25 N O2 S2_ppm:-1.35_Ifit:61MatchedIso.:2; C10 H21 N O7_ppm:1.91_Ifit:64MatchedIso.:2; C11 H17 N5 O3_ppm:-3.1_Ifit:62MatchedIso.:2; C5 H18 N9 O2 P_ppm:0.76_Ifit:91MatchedIso.:2	Adenosine 5'-monophosphate_simScore:84.3; Nicotinamide adenine dinucleotide (NAD+)_simScore:84.5; trans-Zeatin_simScore:84.6; Adenosine triphosphate (ATP)_simScore:84.8; 2'-Deoxyadenosine_simScore:85.2; Cyclic ADP-ribose_simScore:85.3; 2'-O-Methyladenosine_simScore:85.4; Sinefungin_simScore:85.4; Adenosine_score:97.8; Adenine_score:98.9		65998803_:(2R,3S,4R,5R)-2,3,4,5,6-Pentahydroxy-2-(3-methoxypropyl)hexanamide (non-preferred name)_ppm:-0.001_mzLogicScore:11; 67492446_:2'-Deoxy-6-methyl-8-hydroadenosine_ppm:0.001_mzLogicScore:24; 562641_:6-{[3-Oxo-3-(1-piperidinyl)propyl]amino}-1,2,4-triazine-3,5(2H,4H)-dione_ppm:0.001_mzLogicScore:15; 466538_:N-(4-Amino-1,2,5-oxadiazol-3-yl)-2-(1-azabicyclo[2.2.2]oct-3-yloxy)acetamide_ppm:0.00…		Only in E+
268.109	C9 H20 N2 O5 S	7.45		400000	200000	30000	2	45	23.3333	0.5	0.07	0.1	-0.87	-3.77	-2.9	0.169759	0.00415803	0.00934825	2	21	0			No matches found	No matches found	No matches found	No matches found	ddMS2 for preferred ion	C11 H25 O P S2_ppm:0.81_Ifit:37MatchedIso.:2; C10 H21 O6 P_ppm:4.05_Ifit:76MatchedIso.:2; C11 H17 N4 O2 P_ppm:-0.94_Ifit:71MatchedIso.:2; C5 H18 N8 O P2_ppm:2.91_Ifit:59MatchedIso.:2; C9 H20 N2 O5 S_ppm:-2.36_Ifit:72MatchedIso.:3	Malonyl-coenzyme A_simScore:67.9; Cordycepin_simScore:70.4; Zeatin-7-N-glucoside_simScore:78.3; Adenosine 5'-monophosphate_simScore:84.3; trans-Zeatin_simScore:84.6; 2'-Deoxyadenosine_simScore:85.2; Cyclic ADP-ribose_simScore:85.3; 2'-O-Methyladenosine_simScore:85.4; Sinefungin_simScore:85.4; Adenosine_score:97.8		8300868_:2-Hydroxy-1-[4-(2-hydroxyethyl)-1-piperazinyl]-1-propanesulfonic acid_ppm:0.001_mzLogicScore:18; 90557_:HEPPSO_ppm:0.001_mzLogicScore:18		In all samples, lowest in E+, peaks poorly aligned
268.128	C10 H16 N6 O3	2.097		9000	20000	100000	11.1111	100	200	3	10	6	1.34	3.81	2.47	0.885037	0.62784	0.86958	1	0	0			No matches found	No matches found	No matches found	No matches found	ddMS2 for preferred ion	C18 H20 S_ppm:-2.67_Ifit:62MatchedIso.:2; C10 H26 N2 P2 S_ppm:-4.99_Ifit:78MatchedIso.:2; C11 H27 O P3_ppm:1.42_Ifit:76MatchedIso.:2; C10 H24 N2 O2 S2_ppm:-0.24_Ifit:79MatchedIso.:2; C9 H20 N2 O7_ppm:3_Ifit:76MatchedIso.:2; C10 H16 N6 O3_ppm:-1.99_Ifit:77MatchedIso.:2			505014_:4-Amino-N'-[2-(1-piperidinyl)acetoxy]-1,2,5-oxadiazole-3-carboximidamide_ppm:0.001_mzLogicScore:15		~same in all; up in one E+ rep
268.24	C17 H32 O2	2.074		3000000	2000000	600000	33.3333	15	50	0.5	0.2	0.3	-0.9	-2.42	-1.52	0.460666	0.056529	0.151687	97	2	0			No matches found	No matches found	No matches found	No matches found	ddMS2 for other ion	C17 H32 O2_ppm:-1.07_Ifit:100MatchedIso.:2	Sorbitan monooleate_simScore:78; Oleic acid_score:99		67033712_:5,7-Dipropyl-2,10-undecanedione_ppm:0_mzLogicScore:22; 67035033_:(7Z)-7-Pentadecen-1-yl acetate_ppm:0_mzLogicScore:34; 66737617_:16-Heptadecyne-1,1-diol_ppm:0_mzLogicScore:22; 66424527_:(9Z)-10-Methyl-9-hexadecenoic acid_ppm:0_mzLogicScore:42; 67168929_:4-(2-Decylcyclopropyl)butanoic acid_ppm:0_mzLogicScore:24; 67161292_:(8E)-6-Methyl-8-hexadecenoic acid_ppm:0_mzLogicScore:37; 67160275_…		Highest in C, but reps don’t argee well
269.14	C11 H20 N5 O P	11.191		90000	100000	80000	11.1111	50	37.5	2	0.9	0.6	0.66	-0.16	-0.82	0.505708	0.900782	0.339974	61	0	0			No matches found	No matches found	No matches found	No matches found	ddMS2 for preferred ion	C10 H24 N O5 P_ppm:4.08_Ifit:68MatchedIso.:2; C9 H23 N3 O4 S_ppm:-2.31_Ifit:71MatchedIso.:2; C11 H20 N5 O P_ppm:-0.89_Ifit:65MatchedIso.:2			30774153_:4-(-5-Phenyl-1,4-oxazepan-3-yl)phenol_ppm:0.001_mzLogicScore:NA; 66738597_:(2R)-2-{2-[(Methylamino)methyl]phenyl}-3-phenylpropanoic acid_ppm:0.001_mzLogicScore:NA; 67172924_:4-[(E)-2-(4-Methoxyphenyl)vinyl]-6,6-dimethyl-5,6-dihydro-2H-pyran-3-carbonitrile_ppm:0.001_mzLogicScore:NA; 67171144_:(2,2-Dimethyl-1,2,3,4-tetrahydrobenzo[f]isoquinolin-4-yl)acetic acid_ppm:0.001_mzLogicScore:NA; …		~same in all; mess
269.307	C18 H39 N	9.861		100000	100000	60000	10	1	0.5	1	0.6	0.6	0.01	-0.73	-0.74	0.992251	0.0130827	0.0124584	11	0	0			No matches found	No matches found	No matches found	No matches found	No MS2	C18 H39 N_ppm:-3_Ifit:82MatchedIso.:2			520284_:N-Ethyl-6-propyl-6-tridecanamine_ppm:0.001_mzLogicScore:NA; 516106_:N-Methyl-N-octyl-1-nonanamine_ppm:0.001_mzLogicScore:NA; 4931005_:Diheptylisobutylamine_ppm:0.001_mzLogicScore:NA; 516105_:N,N-Dimethyl-8-hexadecanamine_ppm:0.001_mzLogicScore:NA; 3338817_:N,N-Dipropyl-1-dodecanamine_ppm:0.001_mzLogicScore:NA; 2865009_:butyldiheptylamine_ppm:0.001_mzLogicScore:NA; 534264_:N,N-Dibutyl-1-de…		~same in all Rxes
270.067	C5 H17 N6 O P3	7.678		20000	90000	50000	150	111.111	40	4	2	0.5	2.01	1.07	-0.95	0.893844	0.78782	0.972656	20	0	0			No matches found	No matches found	No matches found	No matches found	ddMS2 for preferred ion	C15 H6 N6_ppm:4.71_Ifit:53MatchedIso.:2; C13 H19 P S2_ppm:0.33_Ifit:58MatchedIso.:2; C12 H15 O5 P_ppm:3.55_Ifit:60MatchedIso.:2; C11 H14 N2 O4 S_ppm:-2.81_Ifit:63MatchedIso.:2; C3 H10 N8 O7_ppm:-2.14_Ifit:83MatchedIso.:2; C7 H12 N8 P2_ppm:2.41_Ifit:80MatchedIso.:2; C5 H15 N6 O3 P S_ppm:1.01_Ifit:92MatchedIso.:2; C13 H11 N4 O P_ppm:-1.41_Ifit:58MatchedIso.:2; C5 H17 N6 O P3_ppm:-3.71_Ifit:92Matche…			67164511_:6-Chloro-N-(4-methylphenyl)pyrido[3,2-d]pyrimidin-4-amine_ppm:0.001_mzLogicScore:NA; 23325696_:7-Chloro-4-[(2E)-2-(1H-pyrrol-2-ylmethylene)hydrazino]quinoline_ppm:0.001_mzLogicScore:NA; 9240667_:Difluoro(1-naphthyl)phenylsilane_ppm:0.001_mzLogicScore:NA; 541339_:7-Chloro-5-phenyl-4H-1,3,4-benzotriazepin-2-amine_ppm:0.001_mzLogicScore:NA; 30791706_:S-(Hydroxyphenylacetothiohydroximoyl)-L…		Only present in half of samples
270.219	C16 H30 O3	2.12		500000	300000	100000	20	3.33333	100	0.6	0.2	0.4	-0.72	-2.17	-1.45	0.901035	0.257059	0.382895	33	0	0			No matches found	No matches found	No matches found	No matches found	No MS2	C16 H30 O3_ppm:-1.37_Ifit:90MatchedIso.:2			67031906_:(1E)-1-Hydroxy-1-tetradecen-1-yl acetate_ppm:0_mzLogicScore:NA; 67153334_:2-Hydroxy-3-oxohexadecanal_ppm:0_mzLogicScore:NA; 67153477_:1,5-Dioxacyclooctadecan-2-one_ppm:0_mzLogicScore:NA; 67035723_:10-(3-Butyl-2-oxiranyl)decanoic acid_ppm:0_mzLogicScore:NA; 67156423_:9-Methyl-5-oxopentadecanoic acid_ppm:0_mzLogicScore:NA; 16165933_:Acetic tetradecanoic anhydride_ppm:0_mzLogicScore:NA; 49…		~same in all; up in one C rep
270.256	C17 H34 O2	2.061		500000	600000	40000	40	116.667	12.5	1	0.08	0.07	0.17	-3.61	-3.78	0.823526	0.338062	0.581817	64	0	0			No matches found	No matches found	No matches found	No matches found	No MS2	C17 H34 O2_ppm:-0.55_Ifit:88MatchedIso.:2			67031996_:(2R)-2-Pentadecanyl acetate_ppm:0_mzLogicScore:NA; 67152884_:2,2,3-Trimethyltetradecanoic acid_ppm:0_mzLogicScore:NA; 11271476_:2,14-Dimethylpentadecanoic acid_ppm:0_mzLogicScore:NA; 65998320_:3-Octanyl nonanoate_ppm:0_mzLogicScore:NA; 66738642_:16-Heptadecene-1,1-diol_ppm:0_mzLogicScore:NA; 67159796_:Methyl 2,6-dimethyltetradecanoate_ppm:0_mzLogicScore:NA; 21231768_:3-Methylhexadecanoi…		~same in all
271.126	C9 H21 N O8	11.604		20000	40000	300000	50	25	6.66667	2	20	8	1.06	4.12	3.07	0.263301	0.0107092	0.0258554	0	0	0			No matches found	No matches found	No matches found	No matches found	ddMS2 for preferred ion	C13 H23 N O P2_ppm:1.89_Ifit:62MatchedIso.:2; C12 H22 N3 P S_ppm:-4.45_Ifit:66MatchedIso.:2; C9 H21 N O8_ppm:-2.65_Ifit:79MatchedIso.:3					High in E+, present in C and E-
271.152	C12 H21 N3 O4	9.528		3000	20000	100000	66.6667	100	50	7	60	9	2.72	5.86	3.14	0.644702	0.0921183	0.197848	3	13	0			No matches found	No matches found	No matches found	No matches found	ddMS2 for preferred ion	C6 H22 N7 O3 P_ppm:0.84_Ifit:100MatchedIso.:1; C14 H26 N P S_ppm:0.17_Ifit:85MatchedIso.:2; C12 H21 N3 O4_ppm:-2.96_Ifit:95MatchedIso.:2	Microcystin-WR_simScore:71.8; Microcystin-HiLR_simScore:71.9; Microcystin-HtyR_simScore:71.9; Microcystin-LR_simScore:76.9; Cyclo(glycyltryptophylprolylglycylvalylglycyl-β-hydroxytyrosyl)_simScore:80.3; Microcystin LF_simScore:81.3; Microcystin LY_simScore:85.5; Microcystin RR_simScore:85.8; Microcystin-YR_simScore:86.7; Microcystin LA_simScore:87.3		32674466_:2-(3-(3-Methyloxiran-2-yl)propoxy)ethyl 4-azidobutanoate_ppm:0.001_mzLogicScore:13; 7871039_:(3E)-3-[(Methoxyacetyl)hydrazono]-N-(tetrahydro-2-furanylmethyl)butanamide_ppm:0.001_mzLogicScore:19; 5731051_:({N-[(2S)-2-Pyrrolidiniumylcarbonyl]-L-valyl}amino)acetate_ppm:0.001_mzLogicScore:36		Only in E+, one E- sample
271.178	C14 H25 N O4	9.845		70000	80000	60000	10	5	33.3333	1	0.8	0.7	0.32	-0.25	-0.57	0.47151	0.575262	0.177415	21	0	0			No matches found	No matches found	No matches found	No matches found	No MS2	C14 H25 N O4_ppm:-2.75_Ifit:75MatchedIso.:2			67491668_:Octyl(2-pyrrolidinyl)peroxyanhydride_ppm:0.001_mzLogicScore:NA; 21176430_:(2S,4S)-1-tert-butoxycarbonyl-4-tert-butyl-pyrrolidine-2-carboxylic acid_ppm:0.001_mzLogicScore:NA; 9120779_:Dimethyl (2,2,6,6-tetramethyl-1-piperidinyl)malonate_ppm:0.001_mzLogicScore:NA; 4517204_:Methyl (2E)-6-methyl-4-({[(2-methyl-2-propanyl)oxy]carbonyl}amino)-2-heptenoate_ppm:0.001_mzLogicScore:NA; 4517223_:E…		~same in all Rxes
271.251	C16 H33 N O2	6.725		70000	60000	300000	10	16.6667	66.6667	0.9	4	4	-0.15	2	2.16	0.980439	0.26174	0.221401	15	0	0			No matches found	No matches found	No matches found	No matches found	ddMS2 for preferred ion	C16 H33 N O2_ppm:-2.15_Ifit:86MatchedIso.:3			67159495_:1-Nitrohexadecane_ppm:0.001_mzLogicScore:NA; 477069_:N-Dodecyl-2-methoxypropanamide_ppm:0.001_mzLogicScore:NA; 482071_:(1E)-N-Dodecyl-2,2-dimethoxyethanimine_ppm:0.001_mzLogicScore:NA; 2806843_:N-Tetradecylglycine_ppm:0.001_mzLogicScore:NA; 10652776_:LAURYLDIMETHYLAMMONIOACETATE_ppm:0.001_mzLogicScore:NA; 492796_:1-(Octyloxy)-3-(1-piperidinyl)-2-propanol_ppm:0.001_mzLogicScore:NA; 36683…		Higher in E+, present in all 3
271.287	C17 H37 N O	9.86		300000	600000	300000	23.3333	83.3333	6.66667	2	0.8	0.5	0.8	-0.28	-1.09	0.767262	0.933331	0.584633	0	0	0			No matches found	No matches found	No matches found	No matches found	ddMS2 for preferred ion	C17 H37 N O_ppm:-3.12_Ifit:64MatchedIso.:3					~same in all; up in one E- rep
272.14	C11 H21 N4 O2 P	15.733		60000	80000	300000	16.6667	25	33.3333	1	4	3	0.29	2.09	1.8	0.795315	0.0366551	0.0548221	3	0	0			No matches found	No matches found	No matches found	No matches found	ddMS2 for preferred ion	C13 H16 N6 O_ppm:4.22_Ifit:76MatchedIso.:2; C11 H21 N4 O2 P_ppm:-1.86_Ifit:82MatchedIso.:2			523567_:1,2,3,4-Tetrahydro-1,7-dimethyl-3-(4-methylphenyl)(6H)[1,2,4]triazino[4,3-b][1,2,4,5]tetrazin-6-one_ppm:-0.001_mzLogicScore:NA; 500994_:1,2,3,4-Tetrahydro-1,3,7-trimethyl-3-phenyl(6H)[1,2,4]triazino[4,3-b][1,2,4,5]tetrazin-6-one_ppm:-0.001_mzLogicScore:NA; 319751_:Tris(1-methyl-1H-imidazol-2-yl)methanol_ppm:-0.001_mzLogicScore:NA		Highest in E+, also present in C and E-
272.246	C15 H32 N2 O2	2.285		20000	100000	50000	100	100	100	6	2	0.4	2.63	1.24	-1.4	0.360954	0.764524	0.677179	2	0	0			No matches found	No matches found	No matches found	No matches found	No MS2	C15 H32 N2 O2_ppm:-2.33_Ifit:70MatchedIso.:2			8032459_:N-[3-(Oxido-lambda~5~-azanyl)propyl]dodecanamide_ppm:0.001_mzLogicScore:NA; 505150_:Isopropyl N~2~,N~6~-diisopropyllysinate_ppm:0.001_mzLogicScore:NA		~same in all
273.084	C11 H15 N O7	11.788		300000	300000	100000	2	6.66667	30	0.9	0.4	0.5	-0.08	-1.21	-1.13	0.897758	0.0155531	0.0190598	2	4	0			No matches found	No matches found	No matches found	No matches found	ddMS2 for preferred ion	C5 H16 N5 O6 P_ppm:1.06_Ifit:100MatchedIso.:1; C15 H17 N P2_ppm:1.78_Ifit:76MatchedIso.:2; C7 H21 N3 O2 P2 S_ppm:4.17_Ifit:55MatchedIso.:2; C11 H15 N O7_ppm:-2.72_Ifit:91MatchedIso.:2	3-{[(2-furylmethylidene)amino]oxy}propanenitrile_simScore:94.9; 6-Hydroxypicolinic acid_simScore:96; 3-Hydroxypicolinic acid_simScore:96; Pyrrole-2-carboxylic acid_simScore:96		520349_:Methyl (5-acetamido-2,2-dimethyl-4,6-dioxo-1,3-dioxan-5-yl)acetate_ppm:0.001_mzLogicScore:19; 113189_:1-{[5-(2-Hydroxyethoxy)-4-oxopentanoyl]oxy}-2,5-pyrrolidinedione_ppm:0.001_mzLogicScore:20		~same in all Rxes
273.928	C4 H4 O10 P2	21.816		5000000	5000000	4000000	8	4	2.25	1	0.7	0.7	-0.04	-0.52	-0.49	0.896172	0.0143021	0.0174626	1	0	0			No matches found	No matches found	No matches found	No matches found	ddMS2 for preferred ion	C5 H8 O5 P2 S2_ppm:-2.19_Ifit:32MatchedIso.:2; C4 H4 O10 P2_ppm:0.98_Ifit:76MatchedIso.:3			98870_:1H,1H,2H,2H-Perfluorobutyl iodide_ppm:0_mzLogicScore:NA		~same in all Rxes
276.081	C12 H12 N4 O4	11.608		50000	100000	800000	40	40	7.5	3	20	7	1.32	4.06	2.74	0.117307	0.00577075	0.0176554	11	1	0	98.8		No matches found	No matches found	No matches found	No matches found	ddMS2 for preferred ion	C6 H16 N2 O10_ppm:3.12_Ifit:52MatchedIso.:3; C15 H16 O3 S_ppm:-2.39_Ifit:32MatchedIso.:2; C8 H16 N6 O S2_ppm:-4.87_Ifit:39MatchedIso.:3; C9 H17 N4 O2 P S_ppm:1.35_Ifit:40MatchedIso.:3; C7 H12 N6 O6_ppm:-1.73_Ifit:66MatchedIso.:3; C9 H19 N4 P3_ppm:-3.27_Ifit:95MatchedIso.:2	2,5,6,8-Tetramethyl-4,5,6,7,8,9-hexahydropyrimido[5',4' 5,6]pyrido[3,4-d][1,3]oxazole-4,7,9-trione_score:98.8		25945525_:(3Z)-3-[1-(2,5-Dimethyl-3-thienyl)ethylidene]-4-isopropylidenedihydro-2,5-furandione_ppm:0.001_mzLogicScore:NA; 65326922_:1-Phenyl-2-propanyl benzenesulfonate_ppm:0.001_mzLogicScore:NA; 66424101_:(2E,2'Z)-2,2'-[(1E,2Z)-3-Ethoxy-1,2-butanediylidene]dihydrazinecarbothioamide_ppm:0.001_mzLogicScore:NA; 518849_:7,8,9,10-Tetrahydrocyclohepta[de]naphthalen-8-yl methanesulfonate_ppm:0.001_mzLo…		Highest in E+, probably present in E- and C
277.163	C11 H23 N3 O5	7.628		200000	200000	400000	40	10	10	1	2	2	-0.07	0.63	0.7	0.992498	0.223232	0.20171	2	26	0			No matches found	No matches found	No matches found	No matches found	ddMS2 for preferred ion	C13 H28 N O P S_ppm:0.22_Ifit:80MatchedIso.:2; C11 H23 N3 O5_ppm:-2.85_Ifit:89MatchedIso.:2	Diundecyl phthalate_simScore:74.2; Permethrin_simScore:74.3; Octyl decyl phthalate_simScore:74.3; Diisobutylphthalate_simScore:74.3; Decyl hexyl phthalate_simScore:74.3; Hexyl octyl phthalate_simScore:74.3; Didecyl phthalate_simScore:74.3; 2-({[2-Acetyl-5-(tert-butyl)-3-thienyl]amino}carbonyl)benzoic acid_simScore:74.5; Dioctyl phthalate_simScore:74.9; Diisooctyl phthalate_simScore:74.9		479421_:1-Methyl-3,3-diphenyltetrahydro-3H-pyrrolo[1,2-c][1,3,2]oxazaborole_ppm:0.001_mzLogicScore:16; 8014210_:(R)-(+)-2-methyl-CBS-oxazaborolidine_ppm:0.001_mzLogicScore:16		~same in all Rxes
279.095	C10 H17 N O8	9.381		60000	30000	60000	33.3333	33.3333	83.3333	0.5	0.9	2	-1.01	-0.08	0.93	0.574977	0.920254	0.775395	4	0	0			No matches found	No matches found	No matches found	No matches found	No MS2	C5 H14 N9 O3 P_ppm:-1.99_Ifit:58MatchedIso.:2; C14 H19 N O P2_ppm:3.51_Ifit:85MatchedIso.:2; C13 H18 N3 P S_ppm:-2.64_Ifit:88MatchedIso.:2; C11 H21 N O3 S2_ppm:-4_Ifit:95MatchedIso.:2; C10 H17 N O8_ppm:-0.89_Ifit:100MatchedIso.:2			67034054_:Ethyl {[(2S,3R,4S,5R)-2,3,4,5-tetrahydroxy-6-oxohexanoyl]amino}acetate (non-preferred name)_ppm:0_mzLogicScore:NA; 67025889_:2-Acetamido-1-C-(carboxymethyl)-2-deoxy-D-glucopyranose_ppm:0_mzLogicScore:NA; 21377506_:2-[(3-Carboxypropanoyl)amino]-2-deoxy-D-glucose_ppm:0_mzLogicScore:NA; 514887_:S-(2-([3-(2-Cyclohexen-1-yl)propyl]amino)ethyl) hydrogen thiosulfate_ppm:0.001_mzLogicScore:NA		~same in all
279.204	C13 H29 N O5	2.087		200000	300000	300000	100	13.3333	33.3333	2	2	1	0.77	0.7	-0.07	0.573523	0.613659	0.99631	1	0	0			No matches found	No matches found	No matches found	No matches found	No MS2	C8 H26 N9 P_ppm:-4.1_Ifit:70MatchedIso.:2; C13 H29 N O5_ppm:-3_Ifit:90MatchedIso.:2			505661_:1-Deoxy-1-(heptylamino)hexitol_ppm:0.001_mzLogicScore:NA		~same in all
279.24		2.108		80000	100000	10000	112.5	100	0.5	2	0.1	0.09	0.59	-2.94	-3.54	0.971056	0.523266	0.426294	0	0	0			No matches found	No matches found	No matches found	No matches found	No MS2						~same in all
279.255		2.268		20000	100000	30000	10	100	100	5	1	0.3	2.35	0.52	-1.83	0.798608	0.996577	0.83737	8	25	0			No matches found	No matches found	No matches found	No matches found	ddMS2 for preferred ion		Dihexyl phthalate_simScore:65.3; AB-FUBINACA metabolite 3_simScore:65.3; Dipentyl phthalate_simScore:68.8; n-Pentyl isopentyl phthalate_simScore:71.5; Diundecyl phthalate_simScore:74.2; Decyl hexyl phthalate_simScore:74.3; Hexyl octyl phthalate_simScore:74.3; Didecyl phthalate_simScore:74.3; Dioctyl phthalate_simScore:74.9; Diisooctyl phthalate_simScore:74.9		67154221_:12-Oxooctadecanenitrile_ppm:0.001_mzLogicScore:24; 67170946_:(2E,4E)-N-Isobutyl-2,4-tetradecadienamide_ppm:0.001_mzLogicScore:20; 4927759_:4,4-Dimethyl-2-[(8E)-8-tridecen-1-yl]-4,5-dihydro-1,3-oxazole_ppm:0.001_mzLogicScore:27; 8283203_:9-Octadecynamide_ppm:0.001_mzLogicScore:21; 465597_:4'-Pentyl-1,1'-bi(cyclohexyl)-4-carboxamide_ppm:0.001_mzLogicScore:24; 8906721_:(2E,4E)-N-Isobutyl-2…		~same in all
[truncated: 208 more rows]

## Sheet: All_data_C
Molecular Weight	Putative Formula	Retention time [min]	Putative ID	Mean C	Mean NS	Mean S	CV% C	CV% NS	CV% S	NS/C	S/C	NS/S	Log2(NS/C)	Log2(S/C)	Log2(NS/S)	P-value NS/C	P-value S/C	P-value NS/S	# ChemSpider Results	# mzCloud Results	# mzVault Results	# Metabolika Pathways	Metabolika Pathways	mzCloud Best Match	mzVault Best Match	mzVault Library Match: Bamba lab 34 lipid mediators library stepped NCE 10 30 45	mzVault Library Match: Bamba lab 598 polar metabolites stepped NCE 10 30 45	mzVault Library Match: Lipids022020	mzVault Library Match: MassBankAll02_2020	MS2	Manual chromatogram check
[truncated: 387 more rows]

## Sheet: Overlap
Significant	Infected-specific	Summiting_specific	MW (M)	MW (C)	Mass diff [ppm]	Tentative ID (M)	Tentative ID (C)	Tentative Formula (M)	Tentative Formula (C)	Same tentative formula?	S/NS (M)	S/NS (C)	Same sign?	log2(S/NS) (M)	log2(S/NS) (C)	pValue (M)	pValue (C)	Weight fold avg
[truncated: 168 more rows]
